# Supplementary material for: A systematic review of the effectiveness of protected areas at reducing threats to biodiversity
Source: Research Square preprint supplement (doi:10.21203/rs.3.rs-7046705/v1), 2025-07-11
Supplement: Supplementary file 1 [file 3671c63da8c47c9d787bc82a.xlsx]

## Sheet: Excluded_full_text.csv 
Title	Authors	Abstract	Published Year	Published Month	Journal	Volume	Issue	Pages	Accession Number	DOI	Ref	Covidence #	Study	Notes	Tags
Monitoring of fire incidences in vegetation types and Protected Areas of India: Implications on carbon emissions	Reddy, C. S.; Alekhya, V. V. L. P.; Saranya, K. R. L.; Athira, K.; Jha, C. S.; Diwakar, P. G.; Dadhwal, V. K.	Carbon emissions released from forest fires have been identified as an environmental issue in the context of global warming. This study provides data on spatial and temporal patterns of fire incidences, burnt area and carbon emissions covering natural vegetation types (forest, scrub and grassland) and Protected Areas of India. The total area affected by fire in the forest, scrub and grasslands ha…	2017	Feb	JOURNAL OF EARTH SYSTEM SCIENCE	126	1		WOS:000397298500011	ARTN 11_x000D_10.1007/s12040-016-0791-x		#1	Reddy 2017	Exclusion reason: Missing comparator; Katherine Pulido Chadid (2024-07-26 20:31:05)(Select): Effect of fires on PAs but not the impact of PAs;
Effectiveness of China's Protected Areas in Mitigating Human Activity Pressure	Chen, J.; Shi, H.; Wang, X.; Zhang, Y.; Zhang, Z.	Global protected areas are the key factor in maintaining biodiversity and ecosystem services. However, few studies use human activity pressure to assess the effectiveness of protected areas. This study constructed a human activity pressure index to assess the effectiveness of China's protected areas, and predicted the change trend in 2050 under the SSP scenarios. The results are as follows: (1) F…	2022	1930-07-01	Int J Environ Res Public Health	19	15		35954691	10.3390/ijerph19159335		#2	Chen 2022	Exclusion reason: Limitations in outcome measurement;
Mapping and Evaluating Human Pressure Changes in the Qilian Mountains	Duan, Q. T.; Luo, L. H.; Zhao, W. Z.; Zhuang, Y. L.; Liu, F.	Human activities have dramatically changed ecosystems. As an irreplaceable ecological barrier in western China, the Qilian Mountains (QLM) provide various ecosystem services for humans. To evaluate the changes in the intensity of human activities in the QLM and their impact on the ecosystem, the human footprint (HF) method was used to conduct a spatial dataset of human activity intensity. In our …	2021	Jun	REMOTE SENSING	13	12		WOS:000666384900001	ARTN 2400_x000D_10.3390/rs13122400		#3	Duan 2021	Exclusion reason: No comparator - No control or implemented intervention;
Driven by data: Improved protected area effectiveness in Royal Manas National Park, Bhutan	Wangmo, S.; Wangdi, S.; Wyatt, A.; Tenzin, K.; Lhendup, J.; Singh, R.	The necessity of rangers and other frontline staff for ensuring the protection and effective management of protected areas is well documented. The Spatial Monitoring and Reporting Tool (SMART) was developed as a law enforcement monitoring tool with the aim of assisting management in the allocation of resources and strategic deployment of ranger patrols. The ability of SMART to contribute to impro…	2021	Oct	CONSERVATION SCIENCE AND PRACTICE	3	10		WOS:000674868500001	ARTN e503_x000D_10.1111/csp2.503		#7	Wangmo 2021	Exclusion reason: No comparator - No control or implemented intervention;
An integrated approach to measure hunting intensity and assess its impacts on mammal populations	Dobbins, M.; Sollmann, R.; Menke, S.; Zambrano, A. A.; Broadbent, E.	Unsustainable hunting of wildlife is one of the greatest threats to diverse and healthy forests, yet our understanding of hunting activity is limited by our methods of accurately identifying its intensity and distribution. Several methods have been used to quantify hunting in past studies (e.g. interviews, ranger patrols and camera traps). However, none of these alone have been able to produce pr…	2020	Nov	JOURNAL OF APPLIED ECOLOGY	57	11	2100-2111	WOS:000574835500001	10.1111/1365-2664.13750		#11	Dobbins 2020	Exclusion reason: Biodiversity metric only;
What are the main human pressures affecting Iranâ€™s protected areas?	Rahimi, Ehsan; Dong, Pinliang	More than 75% of terrestrial ecosystems are affected by human activities. To protect biodiversity, humans have created protected areas around the world. However, these areas are also not safe from human activities. In this regard, determining the degree of vulnerability of protected areas to human footprint can provide valuable information to the managers of these areas and help better protect an…	2022		JOURNAL OF ENVIRONMENTAL STUDIES AND SCIENCES	12	4	682-691		10.1007/s13412-022-00785-7		#13	Rahimi 2022	Exclusion reason: Does not meet inclusion criteria ;
Comparison of plant communities on the Ibity and Itremo massifs, Madagascar, with contrasting conservation histories and current status	Alvarado, S. T.; Buisson, E.; Rabarison, H.; Rajeriarison, C.; Birkinshaw, C.; Lowry, P. P.	Background: Deforestation processes and species extinction on islands have made them the focus of substantial efforts to create and strengthen local environmental organisations, establish new protected areas and improve natural resource management. In Madagascar, despite promising new policies, the flora and fauna are under serious threat. More than 80% of the island shows a significant loss of n…	2014	Oct 2	Plant Ecology & Diversity	7	4	497-508	WOS:000343905400003	10.1080/17550874.2013.804131		#14	Alvarado 2014	Exclusion reason: Biodiversity metric only;
Spatiotemporal Patterns of Light Pollution on the Tibetan Plateau over Three Decades at Multiple Scales: Implications for Conservation of Natural Habitats	Wang, Y. H.; Lv, C. F.; Pan, X. H.; Liu, Z. W.; Xia, P.; Zhang, C. N.; Liu, Z. F.	Light pollution (LP), induced by human activities, has become a crucial threat to biodiversity on the Tibetan plateau (TP), but few studies have explored its coverage and dynamics. In this study, we intended to measure the spatiotemporal patterns of LP on the TP from 1992 to 2018. First, we extracted the annual extent of LP from time-series nighttime light data. After that, we analyzed its spatio…	2022	Nov	REMOTE SENSING	14	22		WOS:000887687900001	ARTN 5755_x000D_10.3390/rs14225755		#17	Wang 2022	Exclusion reason: Limitations in outcome measurement;
Cetacean sensitivity and threats analysis to assess effectiveness of protection measures: an example of integrated approach for cetacean conservation in the Bonifacio Bouches	Campana, I.; Angeletti, D.; Giovani, G.; Paraboschi, M.; Arcangeli, A.	The conservation of the highly mobile marine mammals species is challenging. One of the primary tools for conservation of marine species and the maintenance of ecosystem processes is the establishment of marine protected areas which is based on the identification of areas of high ecological value, or the identification of effective mitigation measures for the main threats. Bonifacio Bouches is ma…	2022	Feb	Biodiversity and Conservation	31	2	517-541	WOS:000739826500002	10.1007/s10531-021-02346-w		#19	Campana 2022	Exclusion reason: Does not meet inclusion criteria ;
Profiling unauthorized natural resource users for better targeting of conservation interventions	Harrison, M.; Baker, J.; Twinamatsiko, M.; Milner-Gulland, E. J.	Unauthorized use of natural resources is a key threat to many protected areas. Approaches to reducing this threat include law enforcement and integrated conservation and development (ICD) projects, but for such ICDs to be targeted effectively, it is important to understand who is illegally using which natural resources and why. The nature of unauthorized behavior makes it difficult to ascertain t…	2015	Dec	Conserv Biol	29	6	1636-46	26238261	10.1111/cobi.12575		#20	Harrison 2015	Exclusion reason: Does not meet inclusion criteria ;
Local hunting and the conservation of large mammals in India	Madhusudan, M. D.; Karanth, K. U.	Hunting by local communities is among the most widespread threats to Indian wildlife, yet, the understanding of its nature, extent, and impacts on wildlife has been poor. We surveyed 2 protected areas--Kudremukha and Nagara-hole--in southern India to assess the impacts of local hunting on large mammals. Detailed interviews with retired and active hunters were employed to describe hunting patterns…	2002	Feb	Ambio	31	1	49-54	11928358	10.1579/0044-7447-31.1.49		#24	Madhusudan 2002	Exclusion reason: No comparator - No control or implemented intervention;
Analysis of Landscape Change and Its Driving Mechanism in Chagan Lake National Nature Reserve	Li, Z. Y.; Jiang, Z. L.; Qu, Y. K.; Cao, Y. D.; Sun, F. H.; Dai, Y. D.	Lake ecosystems play an important role in regional ecological security and the sustainable development of the economy and society. In order to study the evolution of landscape patterns and the main driving forces in the Chagan Lake Nature Reserve in recent years, we used landscape type data from 2005, 2010, 2015, and 2019 to study the characteristics of the regional landscape's structural changes…	2022	May	SUSTAINABILITY	14	9		WOS:000794384600001	ARTN 5675_x000D_10.3390/su14095675		#27	Li 2022	Exclusion reason: No comparator - No control or implemented intervention;
The Effect of Rural Buildings on Landscape Fragmentation in Natura 2000 Sites: A Case Study in Sardinia	Ledda, A.; Serra, V.; De Montis, A.	Landscape fragmentation (LF) is the process where habitat patches tend to become smaller and more isolated over time. It is mainly due to human activities and affects habitats, biodiversity, ecosystem balance, and ecological networks. Transport and mobility infrastructures and urbanized areas-also in the form of suburban and rural sprawl-contribute to LF and can be localized close to (or included…	2019	2001-09-01	SUSTAINABILITY	11	17		WOS:000486877700183	ARTN 4695_x000D_10.3390/su11174695		#31	Ledda 2019	Exclusion reason: Does not meet inclusion criteria ;
Quantifying the erosion of natural darkness in the global protected area system	Gaston, K. J.; Duffy, J. P.; Bennie, J.	The nighttime light environment of much of the earth has been transformed by the introduction of electric lighting. This impact continues to spread with growth in the human population and extent of urbanization. This has profound consequences for organismal physiology and behavior and affects abundances and distributions of species, community structure, and likely ecosystem functions and processe…	2015	Aug	Conserv Biol	29	4	1132-1141	25693660	10.1111/cobi.12462		#32	Gaston 2015	Exclusion reason: Does not meet inclusion criteria ;
The Impact of Recreational Activities on Aquatic Vegetation in Alpine Lakes	Dynowski, P.; Senetra, A.; ZrÃ³bek-Sokolnik, A.; Kozlowski, J.	Tourism pressure on protected areas with attractive landscapes leads to environmental modifications. Eutrophication poses the main threat to the quality of water in alpine lakes. Even small inflows of biogenic elements can disrupt the ecological balance of these ecosystems. The aim of this study was to verify the hypothesis that recreational activities and easy access to alpine lakes contribute t…	2019	Jan	WATER	11	1		WOS:000459735100171	ARTN 173_x000D_10.3390/w11010173		#36	Dynowski 2019	Exclusion reason: No comparator - No control or implemented intervention;
Wildfires disproportionately affected jaguars in the Pantanal	de Barros, A. E.; Morato, R. G.; Fleming, C. H.; Pardini, R.; Oliveira-Santos, L. G. R.; Tomas, W. M.; Kantek, D. L. Z.; Tortato, F. R.; Fragoso, C. E.; Azevedo, F. C. C.; Thompson, J. J.; Prado, P. I.	The Pantanal wetland harbours the second largest population of jaguars in the world. Alongside climate and land-use changes, the recent mega-fires in the Pantanal may pose a threat to the jaguars' long-term survival. To put these growing threats into perspective, we addressed the reach and intensity of fires that have affected jaguar conservation in the Pantanal ecoregion over the last 16 years. …	2022	Oct 13	Commun Biol	5	1	1028	36229543	10.1038/s42003-022-03937-1		#37	deBarros 2022	Exclusion reason: No comparator - No control or implemented intervention;
Changes in Light Pollution and the Causing Factors in China's Protected Areas, 1992-2012	Xiang, W. L.; Tan, M. H.	The natural nighttime light environment of the earth has been significantly transformed by human activities. Such light pollution has a profound influence on ecosystems. Protected areas (PAs) play key ecological functions and are only effective at low light pollution levels or without any light pollution. In China, with rapid population growth and high urbanization rates, light pollution in PAs c…	2017	Oct	REMOTE SENSING	9	10		WOS:000414650600056	ARTN 1026_x000D_10.3390/rs9101026		#38	Xiang 2017	Exclusion reason: No comparator - No control or implemented intervention;
Four decades of forest succession in the oak-dominated forest reserves in Slovakia	Saniga, M.; Balanda, M.; Kucbel, S.; Pittner, J.	Species composition, production and the recovery processes were analyzed in three protected areas dominated by natural oak forests in Slovakia over four decades after the cessation of human impact. In each forest reserve, three permanent plots of 0.5 ha were established and monitored regularly every 10 years. As expected, a decrease of oaks in all investigated areas was observed, regardless of th…	2014	2017-04-01	Iforest-Biogeosciences and Forestry	7		324-332	WOS:000341156300001	10.3832/ifor0996-007		#39	Saniga 2014	Exclusion reason: Does not meet inclusion criteria ;
Impacts of disturbance on soil properties in a dry tropical forest in Southern India	Mehta, V. K.; Sullivan, P. J.; Walter, M. T.; Krishnaswamy, J.; DeGloria, S. D.	Grazing. fuelwood extraction and burning are common human activities in Indian forests. These activities can represent forest disturbances that drive the degradation of natural deciduous forest cover to scrub forest, with concurrent impacts on soils. The effects of human forest use on ecosystem functions were investigated in Bandipur National Park (BNP) in Peninsular India. This paper reports the…	2008	Jul	ECOHYDROLOGY	1	2	161-175	WOS:000260000500006	10.1002/eco.15		#41	Mehta 2008	Exclusion reason: Does not meet inclusion criteria ;
Housing growth in and near United States protected areas limits their conservation value	Radeloff, V. C.; Stewart, S. I.; Hawbaker, T. J.; Gimmi, U.; Pidgeon, A. M.; Flather, C. H.; Hammer, R. B.; Helmers, D. P.	Protected areas are crucial for biodiversity conservation because they provide safe havens for species threatened by land-use change and resulting habitat loss. However, protected areas are only effective when they stop habitat loss within their boundaries, and are connected via corridors to other wild areas. The effectiveness of protected areas is threatened by development; however, the extent o…	2010	2012-01-01	Proc Natl Acad Sci U S A	107	2	940-5	20080780	10.1073/pnas.0911131107		#43	Radeloff 2010	Exclusion reason: Missing comparator;
The Implications of Fire Management in the Andean Paramo: A Preliminary Assessment Using Satellite Remote Sensing	Borrelli, P.; Armenteras, D.; Panagos, P.; Modugno, S.; SchÃ¼tt, B.	The upper ranges of the northern Andes are characterized by unique Neotropical, high altitude ecosystems known as paramos. These tundra-like grasslands are widely recognized by the scientific community for their biodiversity and their important ecosystem services for the local human population. Despite their remoteness, limited accessibility for humans and waterlogged soils, paramos are highly fl…	2015	Sep	REMOTE SENSING	7	9	11061-11082	WOS:000362511400003	10.3390/rs70911061		#44	Borrelli 2015	Exclusion reason: No comparator - No control or implemented intervention; Katherine Pulido Chadid (2024-08-23 23:46:35)(Included): They don't really have an outside, but they made the statement that half of the fire occurred inside the NP. ; Jonas Geldmann (2024-08-23 19:46:36)(Select): does have an inside outside - but no matching it seems;	I; Missing comparator: No control / implemented intervention
Targeting conservation action through assessment of protection and exurban threats	Theobald, D. M.	Landscape-level assessments of biodiversity strive to guide land-use planning and conservation activities by providing information about areas of high biodiversity value and low protection status. I developed a methodology to assess the level of threat to conservation of biodiversity to help guide conservation action. This method incorporates socioeconomic indicators of risk, including developed …	2003	Dec	CONSERVATION BIOLOGY	17	6	1624-1637	WOS:000186869700022	DOI 10.1111/j.1523-1739.2003.00250.x		#46	Theobald 2003	Exclusion reason: Does not meet inclusion criteria ;
Anthropogenic impact on past and present fire regimes in a boreal forest landscape of southeastern Norway	Groven, R.; Niklasson, M.	Fire-scarred wood samples from 50 stumps, snags, and living trees of Scots pine (Pinus sylvestris L.) were dendrochronologically cross-dated to describe an 800 year long fire history of Eldferdalen Nature Reserve (similar to 6 ha) and its surroundings (similar to 4000 ha) in southeastern Norway. In the western part of the study area, we recorded 55 different fires within a 200 ha area around the …	2005	Nov	Canadian Journal of Forest Research	35	11	2719-2726	WOS:000234653000018	10.1139/X05-186		#47	Groven 2005	Exclusion reason: Does not meet inclusion criteria ;
Protected area safeguard tree and shrub communities from degradation and invasion: a case study in eastern Madagascar	Brown, K. A.; Carter Ingram, J.; Flynn, D. F.; Razafindrazaka, R.; Jeannoda, V.	Despite their prevalence in both developed and developing countries, there have been surprisingly few field assessments of the ecological effectiveness of protected areas. This study aimed to assess the effectiveness of a key protected area in eastern Madagascar, Ranomafana National Park (RNP). We established paired 100 x 4-m vegetation transects (400 m(2)) within RNP and in remnant forests in th…	2009	Jul	Environ Manage	44	1	136-48	19224275	10.1007/s00267-008-9257-5		#48	Brown 2009	Exclusion reason: Biodiversity metric only;
Beyond Climatic Variation: Human Disturbances Alter the Effectiveness of a Protected Area to Reduce Fires in a Tropical Peatland	Imron, M. A.; Widyastuti, K.; Al Bihad, D.; Satria, R. A.; Prayoga, W.; Pradopo, S. T.; Suryatmojo, H.; Sopha, B. M.; Harrison, M. E.; Berger, U.	Fire is considered a major threat to biodiversity in many habitats and the occurrence of fire has frequently been used to investigate the effectiveness of protected areas. Yet, despite the known importance of tropical peatlands for biodiversity conservation and serious threat that anthropogenically induced fires pose to this ecosystem, the influence of protected area designation on fire occurrenc…	2022	2014-04-01	FRONTIERS IN FORESTS AND GLOBAL CHANGE	5			WOS:000796248100001	ARTN 788023_x000D_10.3389/ffgc.2022.788023		#49	Imron 2022	Exclusion reason: No comparator - No control or implemented intervention;
Assessing possible visitor-use impacts on water quality in Yosemite National Park, California	Clow, D. W.; Peavler, R. S.; Roche, J.; Panorska, A. K.; Thomas, J. M.; Smith, S.	There is concern that visitor-use associated activities, such as bathing, dish washing, wastewater production, and stock animal use near lakes and streams, could cause degradation of water quality in Yosemite National Park. A study was conducted during 2004-2007 to assess patterns in nutrient and Escherichia coli (E. coli) concentrations in the Merced and Tuolumne Rivers and characterize natural …	2011	Dec	Environ Monit Assess	183	2025-04-01	197-215	21336482	10.1007/s10661-011-1915-z		#50	Clow 2011	Exclusion reason: No comparator - No control or implemented intervention;
The oil industry as an underlying factor in the bushmeat crisis in Central Africa	Thibault, M.; Blaney, S.	Although deforestation and habitat loss are considered the main causes of wildlife depletion, the bushmeat trade is one of the foremost threats to biodiversity conservation in central Africa. In 1997 and 1998, we set up a bushmeat trade monitoring program in the town of Gamba to assess the pressure exerted on wildlife by the human population attracted by the oil industry in the Gamba Protected Ar…	2003	Dec	CONSERVATION BIOLOGY	17	6	1807-1813	WOS:000186869700038	DOI 10.1111/j.1523-1739.2003.00159.x		#51	Thibault 2003	Exclusion reason: Does not meet inclusion criteria ;
Tracking change in a human-dominated landscape: developing conservation guidelines using freshwater fish	Carey, M. P.; Mather, M. E.	1. To conserve biodiversity in a human-dominated landscape, a science-based inventory and monitoring plan is needed that quantifies existing resources, isolates drivers that maintain natural Communities, determines harmful stressors, and links ecological drivers and human stressors. A tactical approach is proposed for conservation planning using freshwater fish at the Cape Cod National Seashore._…	2008	Sep-Oct	AQUATIC CONSERVATION-MARINE AND FRESHWATER ECOSYSTEMS	18	6	877-890	WOS:000259544200007	10.1002/aqc.921		#52	Carey 2008	Exclusion reason: Does not meet inclusion criteria ;
Analysis of Forest Cover Change and Its Drivers in Biodiversity Hotspot Areas of the Semien Mountains National Park, Northwest Ethiopia	Debebe, B.; Senbeta, F.; Teferi, E.; Diriba, D.; Teketay, D.	Forests provide multiple ecosystem services ranging from local livelihoods and socio-economic benefits to global ecological services. Despite these benefits, human activities have put immense strain on forest resources, resulting in forest degradation, impoverishment of the environment, and loss of livelihoods. Hence, monitoring forest cover change and identifying its drivers are essential for de…	2023	Feb	SUSTAINABILITY	15	4		WOS:000941388000001	ARTN 3001_x000D_10.3390/su15043001		#53	Debebe 2023	Exclusion reason: No comparator - No control or implemented intervention; Katherine Pulido Chadid (2024-07-18 00:49:38)(Select): Mentions in and around but there is no comparison with "around";
Investigation of Long-Term Forest Dynamics in Protected Areas of Northeast China Using Landsat Data	Wang, J. B.; He, Z. Y.; Wang, C. L.; Feng, M.; Pang, Y.; Yu, T.; Li, X.	Forest dynamics, including forest loss and gain, are long-term complex ecological processes affected by nature and human activities. It is particularly important to understand the long-term forest dynamics of protected areas to evaluate their conservation efforts. This study adopted the Landsat tree-canopy cover (TCC) method to derive annual TCC data for the period 1984-2020 for the protected are…	2022	Jul	REMOTE SENSING	14	13		WOS:000824693900001	ARTN 2988_x000D_10.3390/rs14132988		#54	Wang 2022	Exclusion reason: Missing comparator; Jonas Geldmann (2024-08-23 20:37:36)(Select): I;
Modelling land cover change in the Brazilian Amazon: temporal changes in drivers and calibration issues	Rosa, I. M.; Purves, D.; Carreiras, J. M.; Ewers, R. M.	Land cover change (LCC) models are used in many studies of human impacts on the environment, but knowing how well these models predict observed changes in the landscape is a challenge. We used nearly three decades of LCC maps to run several LCC simulations to: (1) determine which parameters associated with drivers of LCC (e.g. roads) get selected for which transition (forest to deforested, regene…	2015		Reg Environ Change	15	1	123-137	25821401	10.1007/s10113-014-0614-z		#57	Rosa 2015	Exclusion reason: Does not meet inclusion criteria ;
Detecting Trends in Landuse and Landcover Change of Nech Sar National Park, Ethiopia	Fetene, A.; Hilker, T.; Yeshitela, K.; Prasse, R.; Cohen, W.; Yang, Z.	Nech Sar National Park (NSNP) is one of the most important biodiversity centers in Ethiopia. In recent years, a widespread decline of the terrestrial ecosystems has been reported, yet to date there is no comprehensive assessment on degradation across the park. In this study, changes in landcover were analyzed using 30 m spatial resolution Landsat imagery. Interannual variations of normalized diff…	2016	Jan	Environ Manage	57	1	137-47	26298672	10.1007/s00267-015-0603-0		#59	Fetene 2016	Exclusion reason: No comparator - No control or implemented intervention;
Monitoring Land Cover Change and Disturbance of the Mount Wutai World Cultural Landscape Heritage Protected Area, Based on Remote Sensing Time-Series Images from 1987 to 2018	Bai, X. Y.; Du, P. J.; Guo, S. C.; Zhang, P.; Lin, C.; Tang, P. F.; Zhang, C.	The contextual-based multi-source time-series remote sensing and proposed Comprehensive Heritage Area Threats Index (CHATI) index are used to analyze the spatiotemporal land use/land cover (LULC) and threats to the Mount Wutai World Heritage Area. The results show disturbances, such as forest coverage, vegetation conditions, mining area, and built-up area, in the research area changed dramaticall…	2019	2001-06-01	REMOTE SENSING	11	11		WOS:000472648000075	ARTN 1332_x000D_10.3390/rs11111332		#60	Bai 2019	Exclusion reason: Missing comparator;	Missing comparator
Comparing pressures on national parks in Ghana and Tanzania: The case of Mole and Tarangire National Parks	Abukari, H.; Mwalyosi, R. B.	Protected areas do not have immunity against biodiversity loss as their name may suggest. Different protected areas suffer different pressures based on location and the benefits and services expected from them. This paper tried to identify and compare the pressures and threats on the Mole National Park in Ghana and the Tarangire National Park in Tanzania. A section of the Rapid Assessment and Pri…	2018	Jul	GLOBAL ECOLOGY AND CONSERVATION	15			WOS:000446625900002	ARTN e00405_x000D_10.1016/j.gecco.2018.e00405		#62	Abukari 2018	Exclusion reason: Limitations in outcome measurement;
Monitoring human activity in an area dedicated to the protection of the endangered Mediterranean monk seal	Karamanlidis, A. A.; Dendrinos, P.; Tounta, E.; Kotomatas, S.	Mediterranean monk seal populations have declined dramatically and survive in subpopulations scattered throughout their original distribution. The National Marine Park of Alonnisos, Northern Sporades is the first marine protected Area dedicated to the protection of the species in the Mediterranean. A Monitoring and Awareness Project has been carried out in the area from 1993 to 2000, the results …	2004	Jul-Sep	Coastal Management	32	3	293-306	WOS:000221521600005	10.1080/08920750490448523		#63	Karamanlidis 2004	Exclusion reason: Does not meet inclusion criteria ;
Effects of human trampling on macro- and meiofauna communities associated with intertidal algal turfs and implications for management of protected areas on rocky shores (Southern California)	Huff, T. M.	Human visitation to coastal rocky shore ecosystems has numerous impacts via activities such as harvesting, rock-turning, pollution, and trampling. Human trampling, in particular, has been suggested to decrease the density and diversity of rocky shore organisms, especially large foliose algae. Inconsistent results have been seen in studies of the effects of human trampling on coralline algal turfs…	2011	Sep	MARINE ECOLOGY-AN EVOLUTIONARY PERSPECTIVE	32	3	335-345	WOS:000293560400009	10.1111/j.1439-0485.2011.00467.x		#64	Huff 2011	Exclusion reason: Biodiversity metric only;
The Efficacy of Management Measures to Reduce Vessel Noise in Critical Habitat of Southern Resident Killer Whales in the Salish Sea	Burnham, R. E.; Vagle, S.; O'Neill, C.; Trounce, K.	The inland waters around southern Vancouver Island and northern Washington State, known as the Salish Sea, host critical habitat for endangered southern resident killer whales (SRKW). This is, however, a highly traversed area, with approaches to industrial ports and coastal cities, international shipping lanes, ferry routes, and considerable recreational vessel traffic. Vessel noise is a key thre…	2021	1930-07-01	FRONTIERS IN MARINE SCIENCE	8			WOS:000686134400001	ARTN 664691_x000D_10.3389/fmars.2021.664691		#65	Burnham 2021	Exclusion reason: Missing intervention: No PAs involved;
The comparative analyses of selected aspects of conservation and management of Vietnam's national parks	An, L. T.; Markowski, J.; Bartos, M.	The national parks in Vietnam are protected areas in the national system of special-use forests created to protect natural resources and biodiversity. In order to improve the effectiveness of management of national parks, the study assesses some current aspects of conservation and management of natural resources with respect to management plans, financial sources, staff, cooperative activities, c…	2018	2025-01-01	NATURE CONSERVATION-BULGARIA	25	25	1930-01-01	WOS:000423321800001	10.3897/natureconservation.25.19973		#67	An 2018	Exclusion reason: Does not meet inclusion criteria ;
Evolution of a Mediterranean coastal zone: human impacts on the marine environment of Cape Creus	Lloret, J.; Riera, V.	This study presents an integrated analysis of the evolution of the marine environment and the human uses in Cape Creus, a Mediterranean coastal area where intense commercial fisheries and recreational uses have coexisted over the last fifty years. The investigation synthesizes the documented impacts of human activities on the marine environment of Cap de Creus and integrates them with new data. I…	2008	Dec	Environ Manage	42	6	977-88	18800202	10.1007/s00267-008-9196-1		#69	Lloret 2008	Exclusion reason: Does not meet inclusion criteria ;
Forest Habitat Fragmentation in Mountain Protected Areas Using Historical Corona KH-9 and Sentinel-2 Satellite Imagery	Olariu, B.; VÃ®rghileanu, M.; Mihai, B. A.; Savulescu, I.; Toma, L.; Savulescu, M. G.	Forest habitat fragmentation is one of the global environmental issues of concern as a result of forest management practices and socioeconomic drivers. In this context, a constant evaluation of natural habitat conditions still remains a challenge in order to achieve a general image of the environmental state of a protected area for proper sustainable management. The purpose of our study was to ev…	2022	Jun	REMOTE SENSING	14	11		WOS:000809156000001	ARTN 2593_x000D_10.3390/rs14112593		#70	Olariu 2022	Exclusion reason: Missing comparator;
The road to deforestation: Edge effects in an endemic ecosystem in Sumatra, Indonesia	Poor, E. E.; Jati, V. I. M.; Imron, M. A.; Kelly, M. J.	Worldwide, roads are a main driver of deforestation and degradation as they increase forest access along the forest edge. In many tropical areas, unofficial roads go unreported and unrecorded, resulting in inaccurate estimates of intact forested areas. This is the case in central Sumatra, which boasts populations of critically endangered Sumatran elephants (Elephas maximus sumatrensis), tigers (P…	2019		PLoS One	14	7	e0217540	31260478	10.1371/journal.pone.0217540		#71	Poor 2019	Exclusion reason: Does not meet inclusion criteria ;
Human land uses reduce climate connectivity across North America	Parks, S. A.; Carroll, C.; Dobrowski, S. Z.; Allred, B. W.	Climate connectivity, the ability of a landscape to promote or hinder the movement of organisms in response to a changing climate, is contingent on multiple factors including the distance organisms need to move to track suitable climate over time (i.e. climate velocity) and the resistance they experience along such routes. An additional consideration which has received less attention is that huma…	2020	May	Glob Chang Biol	26	5	2944-2955	31961042	10.1111/gcb.15009		#72	Parks 2020	Exclusion reason: Biodiversity metric only;
Exposure of U.S. National Parks to land use and climate change 1900-2100	Hansen, A. J.; Piekielek, N.; Davis, C.; Haas, J.; Theobald, D. M.; Gross, J. E.; Monahan, W. B.; Olliff, T.; Running, S. W.	Many protected areas may not be adequately safeguarding biodiversity from human activities on surrounding lands and global change. The magnitude of such change agents and the sensitivity of ecosystems to these agents vary among protected areas. Thus, there is a need to assess vulnerability across networks of protected areas to determine those most at risk and to lay the basis for developing effec…	2014	Apr	Ecol Appl	24	3	484-502	24834735	10.1890/13-0905.1		#73	Hansen 2014	Exclusion reason: Does not meet inclusion criteria ;
Romanian Natura 2000 Network: Evaluation of the Threats and Pressures through the Corine Land Cover Dataset	Ursu, A.; Stoleriu, C. C.; Ion, C.; Jitariu, V.; Enea, A.	The present paper aims to evaluate if the Natura 2000 sites in Romania are placed over dynamic areas from a land cover changes perspective, or if they are placed in areas with low human interest and what the impact of these changes are. The effectiveness of conservation measures was addressed by analyzing the number of land cover changes and their areas in Natura 2000 sites, before and after decl…	2020	Jul	REMOTE SENSING	12	13		WOS:000550807200001	ARTN 2075_x000D_10.3390/rs12132075		#74	Ursu 2020	Exclusion reason: Missing comparator;
A framework for evaluating the effects of human factors on wildlife habitat: the case of giant pandas	Liu, J. G.; Ouyang, Z.; Taylor, W. W.; Groop, R.; Tan, K. C.; Zhang, H. M.	To address the complex interactions between humans and wildlife habitat, we developed a conceptual framework that links human factors with forested landscapes and wildlife habitat. All the components in the framework are integrated into systems models that analyze the effects of human factors and project how wildlife habitat would change under different policy scenarios. As a case study, we appli…	1999	Dec	CONSERVATION BIOLOGY	13	6	1360-1370	WOS:000083963100017	DOI 10.1046/j.1523-1739.1999.98418.x		#75	Liu 1999	Exclusion reason: No comparator - No control or implemented intervention; Jonas Geldmann (2024-08-23 20:39:16)(Select): I;
Identifying Wetland Change in China's Sanjiang Plain Using Remote Sensing	Zhang, S. Q.; Na, X. D.; Kong, B.; Wang, Z. M.; Jiang, H. X.; Yu, H.; Zhap, Z. C.; Li, X. F.; Liu, C. Y.; Dale, P.	Maximum likelihood supervised classification and post-classification change detection techniques Were applied to Landsat MSS/TM images acquired ill 1976. 1986, 1995. 2000. and 2005 to map land cover changes ill the Small Sanjiang Plain ill northeast China. A hotspots study identified land use changes ill two National Nature Reserves. These were the Honghe National Nature Reserve (HNNR) and the Sa…	2009	Mar	WETLANDS	29	1	302-313	WOS:000265294500030	Doi 10.1672/08-04.1		#76	Zhang 2009	Exclusion reason: Does not meet inclusion criteria ;
Eco-floristic sectors and deforestation threats in Sumatra: identifying new conservation area network priorities for ecosystem-based land use planning	Laumonier, Y.; Uryu, Y.; StÃ¼we, M.; Budiman, A.; Setiabudi, B.; Hadian, O.	Biogeographical studies are a necessary step in establishing conservation area networks. Determining the ecological factors influencing vegetation is also a basic principle for hierarchical ecological classifications and a necessary prerequisite for ecosystem-based land use planning. Eco-floristic sectors (EFS) have already been identified for the Indonesian island of Sumatra, combining both appr…	2010	Apr	Biodiversity and Conservation	19	4	1153-1174	WOS:000275536700016	10.1007/s10531-010-9784-2		#77	Laumonier 2010	Exclusion reason: Limitations in outcome measurement;
Effectiveness of marine protected areas in managing the drivers of ecosystem change: a case of Mnazi Bay Marine Park, Tanzania	Machumu, M. E.; Yakupitiyage, A.	Marine protected areas (MPAs) are being promoted in Tanzania to mitigate the drivers of ecosystem change such as overfishing and other anthropogenic impacts on marine resources. The effectiveness of MPAs in managing those drivers was assessed in three ecological zones, seafront, mangrove, and riverine of Mnazi Bay Marine Park, using Participatory Community Analysis techniques, questionnaire surve…	2013	Apr	Ambio	42	3	369-80	23307198	10.1007/s13280-012-0352-8		#78	Machumu 2013	Exclusion reason: No comparator - No control or implemented intervention;
Vegetation greening trends in different land use types: natural variability versus human-induced impacts in Greece	Gemitzi, A.; Banti, M. A.; Lakshmi, V.	Vegetation greening and browning patterns in two diverse land use environments, i.e., urban areas and sites protected by environmental legislation over Greece, are evaluated and presented in this work. Urban sites correspond to areas of high man intervention, whereas the protected sites are considered as areas with least human impact and are therefore representative of the natural variability of …	2019	Mar	Environmental Earth Sciences	78	5		WOS:000460121600003	ARTN 172_x000D_10.1007/s12665-019-8180-9		#79	Gemitzi 2019	Exclusion reason: Does not meet inclusion criteria ;
Assessment of Conservation Effectiveness of the Qinghai-Tibet Plateau Nature Reserves from a Human Footprint Perspective with Global Lessons	Jiang, M. J.; Zhao, X. F.; Wang, R.; Yin, L.; Zhang, B. L.	The intensity of human pressure (HP) has an important impact on the biodiversity and ecosystem services of nature reserves (NRs), and the conflict and the coordination between NRs and human activities are now key issues to solve in the construction of NR systems. This study improved and applied a human footprint (HF) model that considers population density, land use, night light, grazing intensit…	2023	Apr	LAND	12	4		WOS:000977317000001	ARTN 869_x000D_10.3390/land12040869		#85	Jiang 2023	Exclusion reason: No comparator - No control or implemented intervention; Jonas Geldmann (2024-08-23 20:42:32)(Select): I;
Pushing the Limits: The Pattern and Dynamics of Rubber Monoculture Expansion in Xishuangbanna, SW China	Chen, H.; Yi, Z. F.; Schmidt-Vogt, D.; Ahrends, A.; Beckschafer, P.; Kleinn, C.; Ranjitkar, S.; Xu, J.	The rapidly growing car industry in China has led to an equally rapid expansion of monoculture rubber in many regions of South East Asia. Xishuangbanna, the second largest rubber planting area in China, located in the Indo-Burma biodiversity hotspot, supplies about 37% of the domestic natural rubber production. There, high income possibilities from rubber drive a dramatic expansion of monoculture…	2016		PLoS One	11	2	e0150062	26907479	10.1371/journal.pone.0150062		#87	Chen 2016	Exclusion reason: Missing intervention: No PAs involved;
Rethinking vulnerability and human behaviour in arid and semi-arid regions in northwestern China	Zou, Y.; Xu, J.; Zhang, R.	The relationship between human behaviour and vulnerability is interactive, especially in arid and semi-arid regions. This paper analyses vulnerability and human behaviour in the core areas of Qilian Mountains National Park, which is located in Qilian and Sunan counties. We used the vulnerability index and grey correlation degree methods to analyse the data. The results show that from 2005 to 2017…	2020	May 18	Environ Monit Assess	192	6	379	32424725	10.1007/s10661-020-08320-3		#88	Zou 2020	Exclusion reason: No comparator - No control or implemented intervention;
Habitat monitoring and conservation prioritisation of protected areas in Western Ghats, Kerala, India	Athira, K.; Reddy, C. S.; Saranya, K. R. L.; Joseph, S.; Jaishanker, R.	Spatially explicit approach is essential to prioritise the ecosystems for biodiversity conservation. In the present study, the conservation status of 20 protected areas of the Western Ghats of Kerala, India, was analysed based on long-term changes in forests (1975-1985-1995-2005-2013), landscape level changes in fragmentation and forest fires (2005-2015). This study has shown that a significant f…	2017	Jun	Environ Monit Assess	189	6	295	28551884	10.1007/s10661-017-5998-z		#90	Athira 2017	Exclusion reason: No comparator - No control or implemented intervention; Jonas Geldmann (2024-08-23 19:39:30)(Select): I - No compartor outside; Katherine Pulido Chadid (2024-08-09 01:10:36)(Included): High risk of bias;	High bias - Should be discarted
A global analysis of the drivers of human pressure within protected areas at the national level	Mammides, C.	Global conservation efforts rely largely on effective protected areas. Recently, it was shown that one-third of the world's protected land is under intense human pressure. However, this proportion varies substantially across countries. Some countries are more successful than others in keeping their protected areas relatively free from intense human pressure. In this study, I explore the possible …	2020	Jul	SUSTAINABILITY SCIENCE	15	4	1223-1232	WOS:000529734500001	10.1007/s11625-020-00809-7		#91	Mammides 2020	Exclusion reason: Missing comparator;
Forests and drugs: coca-driven deforestation in tropical biodiversity hotspots	Davalos, L. M.; Bejarano, A. C.; Hall, M. A.; Correa, H. L.; Corthals, A.; Espejo, O. J.	Identifying drivers of deforestation in tropical biodiversity hotspots is critical to assess threats to particular ecosystems and species and proactively plan for conservation. We analyzed land cover change between 2002 and 2007 in the northern Andes, Choco, and Amazon forests of Colombia, the largest producer of coca leaf for the global cocaine market, to quantify the impact of this illicit crop…	2011	2015-02-01	Environ Sci Technol	45	4	1219-27	21222455	10.1021/es102373d		#93	Davalos 2011	Exclusion reason: No comparator - No control or implemented intervention;	Missing comparator: No control / implemented intervention
Assessment of heavy metal pollution risks and enzyme activity of meadow soils in urban area under tourism load: a case study from Zakopane (Poland)	Ciarkowska, K.	Effect of tourism, especially skiing activities, and urbanization on chemical and biochemical properties of soils in touristy town-Zakopane-was investigated. The concentration of heavy metals, nutrients, soil organic matter (SOM), dehydrogenase (DHA), invertase (IA) and urease (Ure) activities in soils from the town centre and out of the town centre was compared with the respective values of adja…	2018	May	Environ Sci Pollut Res Int	25	14	13709-13718	29504077	10.1007/s11356-018-1589-y		#95	Ciarkowska 2018	Exclusion reason: Does not meet inclusion criteria ;
Long-Term GIS Analysis of Seaside Impacts Associated to Infrastructures and Urbanization and Spatial Correlation with Coastal Vulnerability in a Mediterranean Area	Garcia-Ayllon, S.	The relationship between the impacts of coastal perimeter transformations derived from human activity and coastal vulnerability is not easy to assess. The impacts associated with coastal dynamics are phenomena that usually develop very extensively over a considerable time. These are transformations that cause significant environmental damage in vulnerable coastal areas, but whose results are very…	2018	Nov	WATER	10	11		WOS:000451736300149	ARTN 1642_x000D_10.3390/w10111642		#97	Garcia-Ayllon 2018	Exclusion reason: Does not meet inclusion criteria ;
Sustainable wildlife extraction and the impacts of socio-economic change among the Kukama-Kukamilla people of the Pacaya-Samiria National Reserve, Peru	Kirkland, M.; Eisenberg, C.; Bicerra, A.; Bodmer, R. E.; Mayor, P.; Axmacher, J. C.	Throughout the tropics, hunting and fishing are critical livelihood activities for many Indigenous peoples. However, these practices may not be sustainable following recent socio-economic changes in Indigenous populations. To understand how human population growth and increased market integration affect hunting and fishing patterns, we conducted semi-structured interviews in five Kukama-Kukamilla…	2020	Mar	Oryx	54	2	260-269	WOS:000512337200014	Pii S0030605317001922_x000D_10.1017/S0030605317001922		#99	Kirkland 2020	Exclusion reason: Does not meet inclusion criteria ;
Extensive Use of Habitat-Damaging Fishing Gears Inside Habitat-Protecting Marine Protected Areas	Perry, A. L.; Blanco, J.; Garcia, S.; Fournier, N.	Marine protected areas (MPAs) are critical for halting marine biodiversity loss and safeguarding ecosystems. However, efforts to designate additional areas as MPAs have generally taken precedence over ensuring that designated sites are effectively protected. Serious concerns exist about marine "paper parks" in Europe, particularly in relation to the threat of fishing. We focussed on 1,945 MPAs in…	2022	2016-02-01	FRONTIERS IN MARINE SCIENCE	9			WOS:000764092300001	ARTN 811926_x000D_10.3389/fmars.2022.811926		#100	Perry 2022	Exclusion reason: No comparator - No control or implemented intervention; Katherine Pulido Chadid (2024-07-28 04:55:47)(Select): Tricky ;	Maybe
A global assessment of the direct and indirect benefits of marine protected areas for coral reef conservation	Strain, E. M. A.; Edgar, G. J.; Ceccarelli, D.; Stuart-Smith, R. D.; Hosack, G. R.; Thomson, R. J.	Aim Marine protected areas (MPAs) are increasingly implemented to conserve or restore coral reef biodiversity, yet evidence of their benefits for enhancing coral cover is limited and variable. Location 30 MPAs worldwide and nearby sites (within 10 km). Taxa Cover of key functional groups for coral (total, branching, massive and tabular), and algae (total, filamentous, foliose) and total biomass o…	2019	Jan	DIVERSITY AND DISTRIBUTIONS	25	1	2020-09-01	WOS:000455265600003	10.1111/ddi.12838		#101	Strain 2019	Exclusion reason: Does not meet inclusion criteria ;
Threats related to tourism and recreation in Natura 2000 areas, based on the analysis of the standard data forms (SDF) from the Alpine Bioregion of Slovakia	Ciapala, S.; Adamski, P.; Mroczka, A.; Svajda, J.; Witkowski, Z.	The aim of this study was to estimate the size and direction of tourism and recreation influence on protected areas within the Natura 2000 sites. The research covered sites in Slovakia within the Alpine Bioregion. Information included in the Standard Data Form (SDF) was analysed and the SDF used as a basic tool to collect data related to the Natura 2000 sites. The tool contains unified informatio…	2014	Jul	ECO MONT-JOURNAL ON PROTECTED MOUNTAIN AREAS RESEARCH	6	2	55-60	WOS:000344490200009	10.1553/ecomont-6-2s55		#103	Ciapala 2014	Exclusion reason: No comparator - No control or implemented intervention;
Detecting Fire-Caused Forest Loss in a Moroccan Protected Area	Castro, I.; Stan, A. B.; Taiqui, L.; Schiefer, E.; Ghallab, A.; Derak, M.; FulÃ©, P. Z.	Fire is a concern for the sustainability of dry forests such as those of the Mediterranean region, especially under warming climate and high human use. We used data derived from Landsat and MODIS sensors to assess forest changes in the Talassemtane National Park (TNP) in North Africa from 2003-2018. The Talassemtane National Park is a protected area in northern Morocco, a biodiverse, mountainous …	2022	Apr	FIRE-SWITZERLAND	5	2		WOS:000786288300001	ARTN 51_x000D_10.3390/fire5020051		#104	Castro 2022	Exclusion reason: Does not meet inclusion criteria ;
An assessment of threats to terrestrial protected areas	Schulze, K.; Knights, K.; Coad, L.; Geldmann, J.; Leverington, F.; Eassom, A.; Marr, M.; Butchart, S. H. M.; Hockings, M.; Burgess, N. D.	Protected areas (PAs) represent a cornerstone of efforts to safeguard biodiversity, and if effective should reduce threats to biodiversity. We present the most comprehensive assessment of threats to terrestrial PAs, based on in situ data from 1,961 PAs across 149 countries, assessed by PA managers and local stakeholders. Unsustainable hunting was the most commonly reported threat and occurred in …	2018	May-Jun	CONSERVATION LETTERS	11	3		WOS:000435270100019	ARTN e12435_x000D_10.1111/conl.12435		#106	Schulze 2018	Exclusion reason: Does not meet inclusion criteria ;
Protected areas offer refuge from invasive species spreading under climate change	Gallardo, B.; Aldridge, D. C.; Gonzalez-Moreno, P.; Pergl, J.; Pizarro, M.; Pysek, P.; Thuiller, W.; Yesson, C.; Vila, M.	Protected areas (PAs) are intended to provide native biodiversity and habitats with a refuge against the impacts of global change, particularly acting as natural filters against biological invasions. In practice, however, it is unknown how effective PAs will be in shielding native species from invasions under projected climate change. Here, we investigate the current and future potential distribu…	2017	Dec	Glob Chang Biol	23	12	5331-5343	28758293	10.1111/gcb.13798		#107	Gallardo 2017	Exclusion reason: Does not meet inclusion criteria ;
Beyond Protected Areas: Assessing Management Effectiveness of a Ramsar Site in Nepal	Thapa, K.; Lindner, A.	Ramsar Sites, wetlands of international importance, are an international category of protected wetland areas recognized under the Ramsar Convention on Wetlands. Protected areas around the world are not achieving the conservation objectives for which they were established, often due to a lack in effective management practices. Hence, protected area management effectiveness and its assessments are …	2023	2025-04-01	Diversity-Basel	15	5		WOS:000996833800001	ARTN 593_x000D_10.3390/d15050593		#108	Thapa 2023	Exclusion reason: Limitations in outcome measurement;
The relationship between native and non-native species differs among taxa in Canadian national parks	White, P. J. T.; Houlahan, J.	Invasive species are a growing international conservation concern. In Canada, the federal agency responsible for national parks, Parks Canada, has recently identified non-native species as important threats to the integrity and richness of Canadian national parks. To test for potential effects of non-native species on native richness, we examined the relationship between native and non-native/inv…	2007		ECOSCIENCE	14	2	195-204	WOS:000247488100008	Doi 10.2980/1195-6860(2007)14[195:Trbnan]2.0.Co;2		#109	White 2007	Exclusion reason: Does not meet inclusion criteria ;
Non-native Species Surrounding Protected Areas Influence the Community of Non-native Species Within Them	Holenstein, K.; Simonson, W. D.; Smith, K. G.; Blackburn, T. M.; Charpentier, A.	Protected areas (PAs) are a key element of global conservation strategies aiming to protect habitats and species from various threats such as non-natives species (NNS) with negative ecological impacts. Yet little is known about the mechanisms by which PAs are colonized by NNS, and more specifically the role of colonizing events from surrounding areas. Here, we compared terrestrial and freshwater …	2021	2008-01-01	FRONTIERS IN ECOLOGY AND EVOLUTION	8			WOS:000609255100001	ARTN 625137_x000D_10.3389/fevo.2020.625137		#110	Holenstein 2021	Exclusion reason: Biodiversity metric only;
Isolation and no-entry marine reserves mitigate anthropogenic impacts on grey reef shark behavior	Juhel, J. B.; Vigliola, L.; Wantiez, L.; Letessier, T. B.; Meeuwig, J. J.; Mouillot, D.	Reef sharks are vulnerable predators experiencing severe population declines mainly due to overexploitation. However, beyond direct exploitation, human activities can produce indirect or sub-lethal effects such as behavioral alterations. Such alterations are well known for terrestrial fauna but poorly documented for marine species. Using an extensive sampling of 367 stereo baited underwater video…	2019	2027-02-01	Sci Rep	9	1	2897	30814640	10.1038/s41598-018-37145-x		#111	Juhel 2019	Exclusion reason: Does not meet inclusion criteria ;
Assessing the impacts of war on perceived conservation capacity and threats to biodiversity	Conteh, A.; Gavin, M. C.; McCarter, J.	The impacts of war and violent conflicts on biodiversity may vary widely across time and different contexts. However, our understanding of the complex effects of war is limited in most cases due to a lack of study or methodological limitations. We examine the impact of war on conservation in the Western Area Peninsula Forest Reserve in Sierra Leone, a biodiversity hotspot and a site of civil war …	2017	Apr	Biodiversity and Conservation	26	4	983-996	WOS:000398111000013	10.1007/s10531-016-1283-7		#114	Conteh 2017	Exclusion reason: Does not meet inclusion criteria ;
Management-Related Traffic as a Stressor Eliciting Parental Care in a Roadside-Nesting Bird: The European Bee-Eater Merops apiaster	Blas, J.; Abaurrea, T.; D'Amico, M.; Barcellona, F.; Revilla, E.; Roman, J.; Carrete, M.	Traffic is often acknowledged as a threat to biodiversity, but its effects have been mostly studied on roads subjected to high traffic intensity. The impact of lower traffic intensity such as those affecting protected areas is generally neglected, but conservation-oriented activities entailing motorized traffic could paradoxically transform suitable habitats into ecological traps. Here we questio…	2016		PLoS One	11	10	e0164371	27706229	10.1371/journal.pone.0164371		#115	Blas 2016	Exclusion reason: Biodiversity metric only;
Increased human pressures on the alpine ecosystem along the Qinghai-Tibet Railway	Luo, L. H.; Duan, Q. T.; Wang, L. X.; Zhao, W. Z.; Zhuang, Y. L.	Construction of the Qinghai-Tibet Railway (QTR) increased the links between inland China and the Qinghai-Tibet Plateau (QTP). The QTR accelerated surrounding tourism, boosted the local economy and led to rapid development of livestock raising. To assess how distance from the railway and different regions has influenced the impact of the QTR on the alpine ecosystem, human footprint maps were produ…	2020	2002-03-01	REGIONAL ENVIRONMENTAL CHANGE	20	1		WOS:000519060700001	ARTN 33_x000D_10.1007/s10113-020-01616-7		#116	Luo 2020	Exclusion reason: Missing intervention: No PAs involved;
Dynamic Analysis of Mangrove Forests Based on an Optimal Segmentation Scale Model and Multi-Seasonal Images in Quanzhou Bay, China	Lu, C. Y.; Liu, J. F.; Jia, M. M.; Liu, M. Y.; Man, W. D.; Fu, W. W.; Zhong, L. X.; Lin, X. Q.; Su, Y.; Gao, Y. B.	Mangrove forests are important coastal ecosystems and are crucial for the equilibrium of the global carbon cycle. Monitoring and mapping of mangrove forests are essential for framing knowledge-based conservation policies and funding decisions by governments and managers. The purpose of this study was to monitor mangrove forest dynamics in the Quanzhou Bay Estuary Wetland Nature Reserve. To achiev…	2018	Dec	REMOTE SENSING	10	12		WOS:000455637600162	ARTN 2020_x000D_10.3390/rs10122020		#118	Lu 2018	Exclusion reason: Missing intervention: No PAs involved;
Deep-Sea Debris in the Central and Western Pacific Ocean	Amon, D. J.; Kennedy, B. R. C.; Cantwel, K.; Suhre, K.; Glickson, D.; Shank, T. M.; Rotjan, R. D.	Marine debris is a growing problem in the world's deep ocean. The naturally slow biological and chemical processes operating at depth, coupled with the types of materials that are used commercially, suggest that debris is likely to persist in the deep ocean for long periods of time, ranging from hundreds to thousands of years. However, the realized scale of marine debris accumulation in the deep …	2020	May 27	FRONTIERS IN MARINE SCIENCE	7			WOS:000535720300001	ARTN 369_x000D_10.3389/fmars.2020.00369		#119	Amon 2020	Exclusion reason: Limitations in outcome measurement;
Metals in sediments as indicators of anthropogenic impacts in estuaries of south-southeast Brazil	Trevizani, T. H.; Domit, C.; Tramonte, K. M.; de Mahiques, M. M.; Figueira, R. C. L.	The coastal region of Brazil is historically impacted by anthropogenic activities, which release contaminants such as metals. In the estuaries of Paranagua, Cananeia, and Santos in southern Brazil, these activities are present at differing levels. In the present study, concentrations of aluminum, arsenic, cadmium, lead, copper, chromium, iron, nickel, zinc and mercury were investigated, and geoch…	2021	Sep	JOURNAL OF SEDIMENTARY ENVIRONMENTS	6	3	417-430	WOS:000656765100001	10.1007/s43217-021-00069-0		#120	Trevizani 2021	Exclusion reason: No comparator - No control or implemented intervention;
Detecting Historical Vegetation Changes in the Dunhuang Oasis Protected Area Using Landsat Images	Zhang, X. X.; Xie, Y. W.	Given its proximity to an artificial oasis, the Donghu Nature Reserve in the Dunhuang Oasis has faced environmental pressure and vegetation disturbances in recent decades. Satellite vegetation indices (VIs) can be used to detect such changes in vegetation if the satellite images are calibrated to surface reflectance (SR) values. The aim of this study was to select a suitable VI based on the Lands…	2017	Oct	SUSTAINABILITY	9	10		WOS:000414896200110	ARTN 1780_x000D_10.3390/su9101780		#121	Zhang 2017	Exclusion reason: Missing comparator;
Monitoring spatial and temporal pattern of Paneveggio forest (northern Italy) from 1859 to 2006	Tattoni, C.; Ciolli, M.; Ferretti, F.; Cantiani, M. G.	This paper presents the results of a forest cover analysis over a time span of 150 years in a protected area of Eastern Trentino (Northern Italy), Paneveggio Pale di S. Martino Nature Park. With the aid of GRASS GIS two historical maps (1859 and 1936) and a set of aerial photographs taken from 1945 to 2006 have been analysed, orthorectified and classified with a supervised method, in order to der…	2010	2017-03-01	Iforest-Biogeosciences and Forestry	3		72-80	WOS:000290234400004	10.3832/ifor0530-003		#122	Tattoni 2010	Exclusion reason: No comparator - No control or implemented intervention;
Effectiveness of parks in protecting tropical biodiversity	Bruner, A. G.; Gullison, R. E.; Rice, R. E.; da Fonseca, G. A.	We assessed the impacts of anthropogenic threats on 93 protected areas in 22 tropical countries to test the hypothesis that parks are an effective means to protect tropical biodiversity. We found that the majority of parks are successful at stopping land clearing, and to a lesser degree effective at mitigating logging, hunting, fire, and grazing. Park effectiveness correlates with basic managemen…	2001	2005-01-01	SCIENCE	291	5501	125-8	11141563	10.1126/science.291.5501.125		#124	Bruner 2001	Exclusion reason: No comparator - No control or implemented intervention;
Alien Plants Homogenise Protected Areas: Evidence from the Landscape and Regional Scales in South Central Chile	Pauchard, A.; Fuentes, N.; JimÃ©nez, A.; Bustamante, R.; Marticorena, A.	Protected areas are generally considered 'remnant islands' of relatively natural ecosystems and are thus less susceptible to plant invasions than the anthropogenic matrix. However, there is increasing evidence that some invasive species are capable of invading more isolated natural landscapes, higher elevations and relatively undisturbed ecosystems. With an increasing influx and establishment of …	2013		Plant Invasions in Protected Areas: Patterns, Problems and Challenges	7		191-208	WOS:000339070100012	10.1007/978-94-007-7750-7_10		#126	Pauchard 2013	Exclusion reason: Biodiversity metric only;
Post-2020 biodiversity framework challenged by cropland expansion in protected areas	Meng, Z. Q.; Dong, J. W.; Ellis, E. C.; Metternicht, G.; Qin, Y. W.; Song, X. P.; LÃ¶fqvist, S.; Garrett, R. D.; Jia, X. P.; Xiao, X. M.	Protected areas (PAs) are essential for biodiversity conservation but are threatened by cropland expansion. Recent studies have only reported global cropland expansion in large PAs between 1990 and 2005. However, the amount of cropland expansion in global PAs (including relatively small PAs) since the 2000s is unclear. Using 30-m cropland maps, we find that the cropland expansion in PAs accelerat…	2023	Jul	NATURE SUSTAINABILITY	6	7	758-768	WOS:000955739600001	10.1038/s41893-023-01093-w		#127	Meng 2023	Exclusion reason: No comparator - No control or implemented intervention;
Landscape changes in the Mullica River basin of the Pinelands National Reserve, New Jersey, USA	Bunnell, J. F.; Zampella, R. A.; Lathrop, R. G.; Bognar, J. A.	In 1979, the Pinelands Commission was established as a regional land-use planning and regulatory agency charged with the implementation of a Comprehensive Management Plan (CMP) for the Pinelands National Reserve (New Jersey, USA). The CMP was created to balance land preservation and development interests in the Reserve. Because water-quality degradation from developed and agricultural landscapes …	2003	Jun	Environ Manage	31	6	696-708	14565691	10.1007/s00267-002-2871-8		#129	Bunnell 2003	Exclusion reason: Limitations in outcome measurement;
Hunting, Exotic Carnivores, and Habitat Loss: Anthropogenic Effects on a Native Carnivore Community, Madagascar	Farris, Z. J.; Golden, C. D.; Karpanty, S.; Murphy, A.; Stauffer, D.; Ratelolahy, F.; Andrianjakarivelo, V.; Holmes, C. M.; Kelly, M. J.	The wide-ranging, cumulative, negative effects of anthropogenic disturbance, including habitat degradation, exotic species, and hunting, on native wildlife has been well documented across a range of habitats worldwide with carnivores potentially being the most vulnerable due to their more extinction prone characteristics. Investigating the effects of anthropogenic pressures on sympatric carnivore…	2015		PLoS One	10	9	e0136456	26375991	10.1371/journal.pone.0136456		#130	Farris 2015	Exclusion reason: Biodiversity metric only;
Human activities in Natura 2000 sites: a highly diversified conservation network	Tsiafouli, M. A.; Apostolopoulou, E.; Mazaris, A. D.; Kallimanis, A. S.; Drakou, E. G.; Pantis, J. D.	The Natura 2000 network was established across the European Union's (EU) Member States with the aim to conserve biodiversity, while ensuring the sustainability of human activities. However, to what kind and to what extent Natura 2000 sites are subject to human activities and how this varies across Member States remains unspecified. Here, we analyzed 111,269 human activity records from 14,727 prot…	2013	May	Environ Manage	51	5	1025-33	23571828	10.1007/s00267-013-0036-6		#131	Tsiafouli 2013	Exclusion reason: No comparator - No control or implemented intervention; Jonas Geldmann (2024-08-23 21:17:19)(Select): this is a cool paper even if it doesn fit our criteria;
Agricultural expansion into forest reserves in Zambia: a remote sensing approach	Phiri, D.; Mwitwa, J.; Ng'andwe, P.; Kanja, K.; Munyaka, J.; Chileshe, F.; Hamazakaza, P.; Kapembwa, S.; Kwenye, J. M.	Forest reserves play an important role in the provision of ecosystem goods and services; however, these reserves are facing increasing anthropogenic impacts primarily because of agricultural activities. In sub-Saharan Africa, studies on understanding the extent and impacts of agricultural expansion into forest reserves are generally lacking. Thus, this study aimed to assess the extent of agricult…	2023	1931-12-01	GEOCARTO INTERNATIONAL	38	1		WOS:000989833500001	Artn 2213203_x000D_10.1080/10106049.2023.2213203		#133	Phiri 2023	Exclusion reason: No comparator - No control or implemented intervention;
One-third of global protected land is under intense human pressure	Jones, K. R.; Venter, O.; Fuller, R. A.; Allan, J. R.; Maxwell, S. L.; Negret, P. J.; Watson, J. E. M.	In an era of massive biodiversity loss, the greatest conservation success story has been the growth of protected land globally. Protected areas are the primary defense against biodiversity loss, but extensive human activity within their boundaries can undermine this. Using the most comprehensive global map of human pressure, we show that 6 million square kilometers (32.8%) of protected land is un…	2018	May 18	SCIENCE	360	6390	788-791	29773750	10.1126/science.aap9565		#134	Jones 2018	Exclusion reason: No comparator - No control or implemented intervention;
Co-management approach to marine conservation in Moheli, Comoros Islands	Granek, E. F.; Brown, M. A.	Many developing countries experience habitat degradation and unsustainable natural resource exploitation, with biodiversity and habitat conservation efforts often impeded by political instability and limited funding. Challenges in previous conservation efforts coupled with the current rate of marine habitat degradation and species declines warrant consideration of an innovative conservation appro…	2005	Dec	CONSERVATION BIOLOGY	19	6	1724-1732	WOS:000233938100012	10.1111/j.1523-1739.2005.00301.x		#135	Granek 2005	Exclusion reason: Does not meet inclusion criteria ;
Application of modified threat reduction assessments in Lebanon	Matar, D. A.; Anthony, B. P.	Worldwide efforts have concentrated on developing monitoring methods that would enhance the assessment of progress toward achieving the 2010 conservation objectives of the Convention on Biological Diversity. Threat reduction assessment is one such method. It provides an indirect measure of the effects of a conservation project by evaluating changes in human-induced direct threats to protected are…	2010	Oct	Conserv Biol	24	5	1174-81	21182667	10.1111/j.1523-1739.2010.01575.x		#136	Matar 2010	Exclusion reason: No comparator - No control or implemented intervention;	I
Evaluating the Sustainability of Nature Reserves Using an Ecological Footprint Method: A Case Study in China	Liu, X. M.; Jiang, D.; Wang, Q.; Liu, H. M.; Li, J.; Fu, Z.	Nature reserves are established to protect ecosystems and rare flora and fauna. However, with the rapid development of the social economy, many nature reserves are facing enormous pressures from human activities. The assessment of the sustainability of nature reserves is a fundamental task for the planning and management of such areas. In this study, the sustainability of China's 319 national nat…	2016	Dec	SUSTAINABILITY	8	12		WOS:000389317100063	ARTN 1272_x000D_10.3390/su8121272		#137	Liu 2016	Exclusion reason: Biodiversity metric only;
The impact of nature-based tourism on bird communities: a case study in Pallas-Yllastunturi National Park	Huhta, E.; Sulkava, P.	Nature-based tourism and recreation within and close to protected areas may have negative environmental impacts on biodiversity due to urban development, landscape fragmentation, and increased disturbance. We conducted a 3-year study of disturbances of birds induced by nature-based tourism over a recreational gradient in the Pallas-Yllastunturi National Park and its surroundings in northern Finla…	2014	May	Environ Manage	53	5	1005-14	24556796	10.1007/s00267-014-0253-7		#139	Huhta 2014	Exclusion reason: Biodiversity metric only;
Human migration to the forest frontier: Implications for land use change and conservation management	Jones, J. P. G.; Mandimbiniaina, R.; Kelly, R.; Ranjatson, P.; Rakotojoelina, B.; Schreckenberg, K.; Poudyal, M.	Human migration is often considered an important driver of land use change and a threat to protected area integrity, but the reasons for in-migration, the effectiveness of conservation restrictions at stemming migration, and the extent to which migrants disproportionately contribute to land use change has been poorly studied, especially at fine spatial scales. Using a case study in eastern Madaga…	2018	Jan-Jun	Geo-Geography and Environment	5	1		WOS:000436937000003	ARTN e00050_x000D_10.1002/geo2.50		#140	Jones 2018	Exclusion reason: Does not meet inclusion criteria ;
Taxonomic and Phylogenetic Homogenization Across US National Parks: The Role of Non-native Species	Li, D. J.; Lockwood, J. L.; Baiser, B.	US national parks are firmly engrained into the culture of the country. Since the first national park was established in 1872, these protected areas have been central to biodiversity conservation, education, and recreation in the United States. However, national parks face many of the same threats to biodiversity as non-protected areas, including non-native species invasion. As invasive species s…	2018		From Biocultural Homogenization to Biocultural Conservation	3		275-288	WOS:000606983500018	10.1007/978-3-319-99513-7_17		#141	Li 2018	Exclusion reason: Does not meet inclusion criteria ;
Impact on local sustainability of the northward expansion of human activities into protected areas in northern Tibet	Fan, J.; Liang, B.; Liu, H. C.; Wang, Y. F.; Zhao, Y. N.; Zhang, H. P.; Liu, B. Y.; Chen, D.	The negative marginal effect of spatial expansion of human activities on the ecology is increasing, which could easily lead to unsustainable development. However, the reasons for the expansion process and the combined impact on the ecosystem health of protected areas and the sustainable livelihoods of local residents are still vaguely known. Northern Tibet has important ecological service functio…	2022	Sep	Land Degradation & Development	33	15	2945-2959	WOS:000822886200001	10.1002/ldr.4366		#142	Fan 2022	Exclusion reason: No comparator - No control or implemented intervention;
Land cover change and its impact on human-elephant conflict: a case from Fashiakhali forest reserve in Bangladesh	Billah, M. M.; Rahman, M. M.; Abedin, J.; Akter, H.	Changes in land cover are a major driving force behind habitat change, which significantly impacts the distribution of wildlife and ecological systems. However, there is a substantial lack of information on the effects of land cover changes on wildlife habitat and local conservation. Therefore, it is essential to understand how land cover changes may threaten future land cover trends and wildlife…	2021	Jun	SN Applied Sciences	3	6		WOS:001029658900002	ARTN 649_x000D_10.1007/s42452-021-04625-1		#143	Billah 2021	Exclusion reason: No comparator - No control or implemented intervention;
Assessing Changes in Land Use/Land Cover and Ecological Risk to Conserve Protected Areas in Urban-Rural Contexts	Wolf, I. D.; Sobhani, P.; Esmaeilzadeh, H.	Land use/land cover (LULC) changes in response to natural factors and human activities constitute a pressing issue for the conservation of Protected Areas in urban-rural landscapes. The present study investigated LULC changes in the Jajrud Protected Area (JPA) and the Kavdeh Wildlife Refuge (KWR) in the Tehran province, Iran, between 1989 and 2019. To inform ecological conservation measures for t…	2023	Jan	LAND	12	1		WOS:000915720500001	ARTN 231_x000D_10.3390/land12010231		#144	Wolf 2023	Exclusion reason: No comparator - No control or implemented intervention;
Threat analysis for more effective lion conservation	Bauer, H.; Dickman, A.; Chapron, G.; Oriol-Cotterill, A.; Nicholson, S. K.; Sillero-Zubiri, C.; Hunter, L.; Lindsey, P.; Macdonald, D. W.	We use comparable 2005 and 2018 population data to assess threats driving the decline of lion Panthera leo populations, and review information on threats structured by problem tree and root cause analysis. We define 11 threats and rank their severity and prevalence. Two threats emerged as affecting both the number of lion populations and numbers within them: livestock depredation leading to retal…	2022	Jan	Oryx	56	1	108-115	WOS:000738708300028	Pii S0030605320000253_x000D_10.1017/S0030605320000253		#145	Bauer 2022	Exclusion reason: Biodiversity metric only;
Land-Cover Change in the Kruger to Canyons Biosphere Reserve (1993-2006): A First Step Towards Creating a Conservation Plan for the Subregion	Coetzer, K. L.; Erasmus, B. F. N.; Witkowski, E. T. F.; Bachoo, A. K.	This paper is a first step towards a conservation plan for the Kruger to Canyons Biosphere Reserve (K2C) on the South African Central Lowveld, quantifying the historical land-cover trends (1993 2006). During the analysis period, 36% of the biosphere reserve (BR) underwent land-cover change. Settlement areas increased by 39.7%, mainly in rural areas, becoming denser, particularly along roadways. H…	2010	Jul-Aug	SOUTH AFRICAN JOURNAL OF SCIENCE	106	2025-08-07	26-35	WOS:000281700300007	10.4102/sajs.v106i7/8.221		#146	Coetzer 2010	Exclusion reason: No comparator - No control or implemented intervention;
Socioeconomic context of land use and land cover change in Mexican biosphere reserves	Figueroa, F.; SÃ¡nchez-Cordero, V.; Meave, J. A.; Trejo, I.	Land use/land cover change (LULC) is a major threat to natural protected areas worldwide. This paper explores the relationships between four estimated LULC. parameters for 17 Mexican biosphere reserves (BRs) for 1993-2002 on a GIS platform, and ten socioeconomic factors obtained from census data. These relationships were tested through linear correlations and multivariate analysis. BRs showed low…	2009	Sep	ENVIRONMENTAL CONSERVATION	36	3	180-191	WOS:000275897300002	10.1017/S0376892909990221		#149	Figueroa 2009	Exclusion reason: Does not meet inclusion criteria ;
Protected Areas of the Pampa biome presented land use incompatible with conservation purposes	Ribeiro, S.; Moreira, L. F. B.; Overbeck, G. E.; Maltchik, L.	Currently, only 40% of Brazil's Pampa still is covered by original vegetation; however, there is a clear underrepresentation of regional biodiversity in protected areas (PA). Herein, we assessed the extent to which 13 PAs for the Integral Protection in the Brazilian Pampa are effective in conserving samples of the natural attributes and biodiversity of the Pampa. Of all 13 PAs analysed, 11 showed…	2021	May 4	JOURNAL OF LAND USE SCIENCE	16	3	260-272	WOS:000657163700001	10.1080/1747423x.2021.1934134		#150	Ribeiro 2021	Exclusion reason: Does not meet inclusion criteria ;
Dynamics of Land Use and Land Cover in the Kafta-Sheraro National Park, NW Ethiopia: Patterns, Causes and Management Implications	Arafaine, Z.; Asefa, A.	Kafta-Sheraro National Park (KSNP) is one of the most important protected areas in Ethiopia and provides a number of important ecological and hydrological benefits to the local people. However, the park is under immense pressure as a result of a rapidly increasing human population that resulted from a voluntary resettlement program launched by the government in 2003. Using satellite imageries tak…	2019		MOMONA ETHIOPIAN JOURNAL OF SCIENCE	11	2	239-257	WOS:000493739200005	10.4314/mejs.v11i2.5		#151	Arafaine 2019	Exclusion reason: No comparator - No control or implemented intervention;	I; Missing comparator: No control / implemented intervention
Effectiveness of protected areas influenced by socio-economic context	Gatiso, T. T.; Kulik, L.; Bachmann, M.; Bonn, A.; BÃ¶sch, L.; Eirdosh, D.; Freytag, A.; Hanisch, S.; Heurich, M.; Sop, T.; Wesche, K.; Winter, M.; KÃ¼hl, H. S.	Protected areas (PAs) are not completely halting biodiversity loss, according to growing evidence. This study shows the limited effectiveness of a large network of PAs despite favourable socio-economic context and high conservation efforts, suggesting that PA functional design matters beyond increasing resources._x000D_Protected area (PA) performance is thought to depend on effective conservation…	2022	Oct	NATURE SUSTAINABILITY	5	10	861-868	WOS:000840585100002	10.1038/s41893-022-00932-6		#152	Gatiso 2022	Exclusion reason: Does not meet inclusion criteria ;
Demarcation of Forest Fire Risk Zones in Silent Valley National Park and the Effectiveness of Forest Management Regime	Amrutha, K.; Danumah, J. H.; Nikhil, S.; Saha, S.; Rajaneesh, A.; Mammen, P. C.; Ajin, R. S.; Kuriakose, S. L.	Wildfires pose a major threat to the forest ecosystems and species of the Western Ghats' protected areas. Fires have also ravaged the Silent Valley National Park in the past. This study aimed to map the fire risk zones using the analytical hierarchy process (AHP) method, to assess the effect of each factor on the occurrence of fire and to assess the effectiveness of the forest management regime o…	2022	Jun	JOURNAL OF GEOVISUALIZATION AND SPATIAL ANALYSIS	6	1		WOS:000764841300001	ARTN 8_x000D_10.1007/s41651-022-00103-3		#154	Amrutha 2022	Exclusion reason: Does not meet inclusion criteria ;
Assessment of human-induced effects in the Sultan marshes (Ramsar Protection), Kayseri (Turkey)	Aydin-Kandemir, F.; Demir, A.	This study examines the drying in the Sultan Marshes and the spatio-temporal change of different land cover classes. Corine land cover change outputs were examined for four periods (1990-2000; 2000-2006; 2006-2012; and 2012-2018). During these analyses, the period when the water area changes in the lakes occur the most was determined. Moreover, other land cover changes occurring in the region wer…	2022	Oct 17	Environ Monit Assess	194	12	909	36253656	10.1007/s10661-022-10626-3		#155	Aydin-Kandemir 2022	Exclusion reason: No comparator - No control or implemented intervention;	I; Missing comparator
Monitoring for management of conservation and recreation in Australian protected areas	Buckley, R.; Robinson, J.; Carmody, J.; King, N.	Protected areas are key to conservation of biodiversity, and Australia is one of the world's megadiverse regions. Monitoring programs provide the information to assess the state of conservation resources, the severity of threats and the success of management responses. Here we compare the management priorities, monitoring priorities and actual monitoring practices of protected area management age…	2008	Dec	Biodiversity and Conservation	17	14	3589-3606	WOS:000260938000020	10.1007/s10531-008-9448-7		#156	Buckley 2008	Exclusion reason: Does not meet inclusion criteria ;
Conservation gone to the dogs: when canids rule the beach in small coastal reserves	Schlacher, T. A.; Weston, M. A.; Lynn, D.; Schoeman, D. S.; Huijbers, C. M.; Olds, A. D.; Masters, S.; Connolly, R. M.	On most developed coastlines, dunes backing ocean beaches constitute an urbanised landscape mosaic containing remnant pockets of small conservation areas. Urbanised beaches are also prime sites for domestic dogs, known to be environmentally harmful in many other settings. It is unknown, however, whether small, protected parcels of dune are adequate for biological conservation and whether dogs com…	2015	Mar	Biodiversity and Conservation	24	3	493-509	WOS:000350228800005	10.1007/s10531-014-0830-3		#158	Schlacher 2015	Exclusion reason: Does not meet inclusion criteria ;
Natural Resource Use by Humans and Response of Wild Ungulates	Bhattacharya, T.; Sathyakumar, S.	We investigated the levels of natural resource use by humans and the consequent response of wild mountain ungulates in the subalpine and alpine habitats of Bedini-Ali, located in the transition zone of the Nanda Devi Biosphere Reserve, India, from 2005 to 2006. The livestock population in the area, livestock dung density, and the number of trees cut, lopped, and debarked by humans were estimated …	2011	Aug	Mountain Research and Development	31	3	209-219	WOS:000294947400004	10.1659/Mrd-Journal-D-10-00069.1		#159	Bhattacharya 2011	Exclusion reason: Does not meet inclusion criteria ;
The relative conservation impact of strategies that prioritize biodiversity representation, threats, and protection costs	Sacre, E.; Weeks, R.; Bode, M.; Pressey, R. L.	Despite exponential increases in the coverage of protected areas (PAs) over recent decades, global biodiversity continues to decline. One explanation for this lack of success is that the efficacy of conservation prioritization strategies is rarely measured in terms of conservation "impact," which requires comparing proposed PA networks to a counterfactual scenario in which no intervention is appl…	2020	Aug	CONSERVATION SCIENCE AND PRACTICE	2	8		WOS:000567417300005	ARTN e221_x000D_10.1111/csp2.221		#160	Sacre 2020	Exclusion reason: Biodiversity metric only;
Mediterranean wetland conservation in the context of climate and land cover change	Leberger, R.; Geijzendorffer, I. R.; Gaget, E.; Gwelmami, A.; Galewski, T.; Pereira, H. M.; Guerra, C. A.	Wetlands are known to support diverse and unique species assemblages. Globally, but particularly in the Mediterranean basin, they are threatened by climate change and natural habitat loss. Despite an alarming decline of wetlands over the last century, standardised and systematic site assessments at large scale do not exist. Here, we perform an integrated assessment of Mediterranean wetlands by ev…	2020	2002-06-01	REGIONAL ENVIRONMENTAL CHANGE	20	2		WOS:000537456900001	ARTN 67_x000D_10.1007/s10113-020-01655-0		#161	Leberger 2020	Exclusion reason: No comparator - No control or implemented intervention;
Efficacy of a voluntary area to be avoided to reduce risk of lethal vessel strikes to endangered whales	Vanderlaan, A. S.; Taggart, C. T.	Ocean-going vessels pose a threat to large whales worldwide and are responsible for the majority of reported deaths diagnosed among endangered North Atlantic right whales (Eubalaena glacialis). Various conservation policies have been implemented to reduce vessel-strike mortality in this species. The International Maritime Organization adopted the Roseway Basin Area to be avoided on the Scotian Sh…	2009	Dec	Conserv Biol	23	6	1467-74	19775275	10.1111/j.1523-1739.2009.01329.x		#163	Vanderlaan 2009	Exclusion reason: Missing intervention: No PAs involved;
Changes in _x000D_ woodland structure under different land tenure and use systems in central Zambia	Chidumayo, E. N.	Aim Population pressure and communal land ownership are often perceived as serious threats to forest conservation in savanna woodlands of central and southern Africa. I aimed at testing the hypothesis that the rate of miombo woodland recovery after clearing and re-growth structure are determined by land tenure and use._x000D_Location Miombo woodland under customary, leasehold, forest reserve and …	2002	Dec	JOURNAL OF BIOGEOGRAPHY	29	12	1619-1626	WOS:000179767400003	DOI 10.1046/j.1365-2699.2002.00794.x		#165	Chidumayo 2002	Exclusion reason: No comparator - No control or implemented intervention;
Effectiveness of the system of protected areas of Lombardy (Northern Italy) in preserving breeding birds	Sicurella, B.; Orioli, V.; Pinoli, G.; Ambrosini, R.; Bani, L.	Networks of protected areas (PAs) where human activities are allowed at different degrees are fundamental to ensure the long-term conservation of biological diversity and ecological processes. However, studies aimed at assessing their effectiveness, focusing on several species simultaneously are scarce. We assessed the effectiveness of the system of protected areas (PAs) of Lombardy, Northern Ita…	2018	Sep	Bird Conservation International	28	3	475-492	WOS:000445628100012	10.1017/S095927091700017x		#166	Sicurella 2018	Exclusion reason: Biodiversity metric only;
Use and development of the wetland macrophyte index to detect water quality impairment in fish habitat of great lakes coastal marshes	Croft, M. V.; Chow-Fraser, P.	Indices have been developed with invertebrates, fish, and water quality parameters to detect the impact of human disturbance on coastal wetlands, but a macrophyte index of fish habitat for the Great Lakes does not currently exist. Because wetland macrophytes are directly influenced by water quality, any impairment in wetland quality should be reflected by taxonomic composition of the aquatic plan…	2007		Journal of Great Lakes Research	33		172-197	WOS:000254896200012	Doi 10.3394/0380-1330(2007)33[172:Uadotw]2.0.Co;2		#167	Croft 2007	Exclusion reason: Does not meet inclusion criteria ;
Long-term assessment of temperate octocoral mortality patterns, protected vs. unprotected areas	Coma, R.; Pola, E.; Ribes, M.; Zabala, M.	Coastal marine protected areas (MPAs) are usually established with an aim to protect areas of special ecological value. However, protected areas tend to attract more tourism and associated recreational activities, thereby exposing the biota to new risks such as high diving activity. The effects of these drawbacks are still little known for low-dynamic systems such as one of the most characteristi…	2004	Oct	Ecological Applications	14	5	1466-1478	WOS:000224568800013	Doi 10.1890/03-5176		#168	Coma 2004	Exclusion reason: Biodiversity metric only;
Rapid Invasion of _x000D_ in the Coastal Zone of Mainland China: New Observations from Landsat OLI Images	Liu, M. Y.; Mao, D. H.; Wang, Z. M.; Li, L.; Man, W. D.; Jia, M. M.; Ren, C. Y.; Zhang, Y. Z.	Plant invasion imposes significant threats to biodiversity and ecosystem function. Thus, monitoring the spatial pattern of invasive plants is vital for effective ecosystem management. Spartina alterniflora (S. alterniflora) has been one of the most prevalent invasive plants along the China coast, and its spread has had severe ecological consequences. Here, we provide new observation from Landsat …	2018	Dec	REMOTE SENSING	10	12		WOS:000455637600075	ARTN 1933_x000D_10.3390/rs10121933		#171	Liu 2018	Exclusion reason: No comparator - No control or implemented intervention;
Effectiveness of conservation easements in agricultural regions	Braza, M.	Conservation easements are a standard technique for preventing habitat loss, particularly in agricultural regions with extensive cropland cultivation, yet little is known about their effectiveness. I developed a spatial econometric approach to propensity-score matching and used the approach to estimate the amount of habitat loss prevented by a grassland conservation easement program of the U.S. f…	2017	Aug	Conserv Biol	31	4	848-859	28218793	10.1111/cobi.12909		#172	Braza 2017	Exclusion reason: Missing intervention: No PAs involved;	Does not meet inclusion criteria / No PAs
Poverty not taste drives the consumption of protected species in Madagascar	Merson, Samuel D.; Dollar, Luke J.; Johnson, Paul J.; Macdonald, David W.	Bushmeat consumption in Madagascar is increasingly acknowledged as one of the major threats to its wild vertebrates. Nevertheless, few studies have examined the drivers of the consumption of protected versus legally huntable wild species, or examined its variance across Madagascar's protected and unprotected areas. This research provides a novel study of the consumption of protected, unprotected,…	2019		Biodiversity and Conservation	28	13	3669-3689		10.1007/s10531-019-01843-3		#173	Merson 2019	Exclusion reason: Limitations in outcome measurement;
A global analysis of the effectiveness of marine protected areas in preventing coral loss	Selig, E. R.; Bruno, J. F.	BACKGROUND: A variety of human activities have led to the recent global decline of reef-building corals. The ecological, social, and economic value of coral reefs has made them an international conservation priority. The success of Marine Protected Areas (MPAs) in restoring fish populations has led to optimism that they could also benefit corals by indirectly reducing threats like overfishing, wh…	2010	2017-02-01	PLoS One	5	2	e9278	20174644	10.1371/journal.pone.0009278		#174	Selig 2010	Exclusion reason: Biodiversity metric only;
Reef accessibility impairs the protection of sharks	Juhel, J. B.; Vigliola, L.; Mouillot, D.; Kulbicki, M.; Letessier, T. B.; Meeuwig, J. J.; Wantiez, L.	1. Reef sharks are declining world-wide under ever-increasing fishing pressure, with potential consequences on ecosystem functioning. Marine protected areas (MPAs) are currently one of the management tools used to counteract the pervasive impacts of fishing. However, MPAs in which reef sharks are abundant tend to be located in remote and underexploited areas, preventing a fair assessment of manag…	2018	Mar	JOURNAL OF APPLIED ECOLOGY	55	2	673-683	WOS:000424881800021	10.1111/1365-2664.13007		#176	Juhel 2018	Exclusion reason: Biodiversity metric only;
Habitat loss and overhunting synergistically drive the extirpation of jaguars from the Gran Chaco	Romeroâ€MuÃ±oz, Alfredo; Torres, Ricardo; Noss, Andrew J.; Giordano, Anthony J.; Quiroga, VerÃ³nica; Thompson, Jeffrey J.; Baumann, Matthias; Altrichter, Mariana; McBride, Roy; Velilla, Marianela; Arispe, Rosario; Kuemmerle, Tobias; Stevens, George	Aim Understanding how habitat loss and overhunting impact large carnivores is important for broad-scale conservation planning. We aimed to assess how these threats interacted to affect jaguar habitat (Panthera onca) between 1985-2013 in the Gran Chaco, a deforestation hotspot. Location Gran Chaco ecoregion in Argentina, Paraguay and Bolivia. Methods We modelled jaguar habitat change from 1985-201…	2018	Feb	DIVERSITY AND DISTRIBUTIONS	25	2	176-190	WOS:000456796100002	10.1111/ddi.12843		#178	Romeroâ€MuÃ±oz 2018	Exclusion reason: Biodiversity metric only;
A comparative assessment of land cover dynamics of three protected forest areas in tropical eastern Africa	Lung, T.; Schaab, G.	Processes of deforestation, known to threaten tropical forest biodiversity, have not yet been studied sufficiently in East Africa. To shed light on the patterns and causes of human influences on protected forest ecosystems, comparisons of different study areas regarding land cover dynamics and potential drivers are needed. We analyze the development of land cover since the early 1970s for three p…	2010	Feb	Environ Monit Assess	161	2025-04-01	531-48	19330457	10.1007/s10661-009-0766-3		#181	Lung 2010	Exclusion reason: No comparator - No control or implemented intervention;
Evaluating Habitat Change and Boundary Adjustment of a Nature Reserve in Coastal Wetlands: Case Study of Beidagang Nature Reserve, China	Xie, Z. L.; Liu, J. Y.; Zhu, G. R.; Shao, Q. Q.; Xu, X. G.	Habitat change of coastal wetlands caused by natural and anthropogenic factors is an important issue facing China. Large areas of coastal habitat are disappearing, and those remaining become vulnerable to anthropogenic impacts from industry, agriculture, aquaculture, urban development, and domestic waste. A question is whether the change of habitat area has an influence on boundary adjustments of…	2011	Sep	JOURNAL OF COASTAL RESEARCH	27	5	966-972	WOS:000294523800015	10.2112/Jcoastres-D-10-00134.1		#182	Xie 2011	Exclusion reason: No comparator - No control or implemented intervention;
Spatiotemporal Evolution and Influencing Factors of Landscape Ecological Vulnerability in the Three-River-Source National Park Region	Yu, H.; Zhang, X. Y.; Deng, Y.	The increasing impact of global warming and human activities has exacerbated the ecological environment in the Three-River-Source National Park Region (TNPR). Understanding the temporal and spatial evolution of landscape ecological vulnerability (LEV) and its influencing factors are crucial to the implementation of environmental management. Here, we aimed to: 1) construct a LEV assessment model i…	2022	Oct	Chinese Geographical Science	32	5	852-866	WOS:000822475400001	10.1007/s11769-022-1297-x		#183	Yu 2022	Exclusion reason: No comparator - No control or implemented intervention;
Response of Two Major Lakes in the Changtang National Nature Reserve, Tibetan Plateau to Climate and Anthropogenic Changes over the Past 50 Years	Zhao, Z. L.; Hu, Z. Z.; Zhou, J.; Kan, R. L.; Li, W. J.	Areal changes in alpine lakes on the Tibetan Plateau (TP) are reliable indicators of climate change and anthropogenic disturbance. This study used long-term Landsat images and meteorological records to monitor the temporal evolution patterns of lakes within the Changtang National Nature Reserve between 1972 and 2021 and examine the climatic and anthropogenic impacts on lake area changes. The resu…	2023	Feb	LAND	12	2		WOS:000940448600001	ARTN 267_x000D_10.3390/land12020267		#184	Zhao 2023	Exclusion reason: Does not meet inclusion criteria ;
The effect of anthropogenic and natural factors on the prevalence of physicochemical parameters of water and bacterial water quality indicators along the river Bialka, southern Poland	Bojarczuk, A.; Jelonkiewicz, L.; Lenart-Boron, A.	This study was aimed to determine the anthropogenic and natural factors affecting spatial and temporal changes in the physicochemical parameters and bacterial indicators of water quality in the river Bialka. The impact of intensive development of the tourist infrastructure on the quality of river water and the potential health threats to tourists was also assessed. Water samples were collected ov…	2018	Apr	Environ Sci Pollut Res Int	25	10	10102-10114	29383643	10.1007/s11356-018-1212-2		#186	Bojarczuk 2018	Exclusion reason: Does not meet inclusion criteria ;
Identification of Anthropogenic Impact on Natural Habitats by Antimicrobial Resistance Quantification in Two Neotropical Wild Cats and Their Geospatial Analysis	Angulo, A. S.; Fajardo, F. E.; Salom-Perez, R.; Carazo-Salazar, J.; Taylor, F.; Pile, E.; Quesada-Alvarado, F.; Blanco-Pena, K.	Human activities such as habitat degradation and fragmentation threaten biodiversity in Neotropical areas. This work proposes an analytical methodology to identify natural areas in Central America with anthropogenic impact, analyzing the presence of antimicrobial resistance genes (ARGs) in accordance with their theoretical relationship with human-related activities. Sixteen ARGs were quantified i…	2023	2001-01-01	J Wildl Dis	59	1	2023-12-01	36762840	10.7589/JWD-D-21-00182		#188	Angulo 2023	Exclusion reason: Biodiversity metric only;
Conservation research presence protects: a case study of great ape abundance in the Dja region, Cameroon	Tagg, N.; Willie, J.; Duarte, J.; Petre, C. A.; Fa, J. E.	Research programmes have been shown to exert a positive impact on faunal communities, but few studies provide empirical evidence. In this study, we surveyed three neighbouring sites, differing in terms of official protection status and level of active management, in the Dja Conservation Complex, southeast Cameroon. We recorded signs of human activity and anthropogenic pressures and found that the…	2015	Dec	ANIMAL CONSERVATION	18	6	489-498	WOS:000367672500001	10.1111/acv.12212		#189	Tagg 2015	Exclusion reason: Biodiversity metric only;
Use of modified threat reduction assessments to estimate success of conservation measures within and adjacent to Kruger National Park, South Africa	Anthony, B. P.	The importance of biodiversity as natural capital for economic development and sustaining human welfare is well documented. Nevertheless, resource degradation rates and persistent deterioration of human welfare in developing countries is increasingly worrisome. Developing effective monitoring and evaluation schemes and measuring biodiversity loss continue to pose unique challenges, particularly w…	2008	Dec	Conserv Biol	22	6	1497-505	18759776	10.1111/j.1523-1739.2008.01030.x		#190	Anthony 2008	Exclusion reason: No comparator - No control or implemented intervention;	I
Urban Expansion Was the Main Driving Force for the Decline in Ecosystem Services in Hainan Island during 1980-2015	Geng, J.; Yuan, M.; Xu, S.; Bai, T.; Xiao, Y.; Li, X.; Xu, D.	Hainan Island is one of China's most ecologically diverse areas. Human activities and climate change have recently influenced Hainan Island's ecosystem services. Therefore, scientific methods are urgently needed to investigate the characteristics of these services' spatial and temporal variations and their driving mechanisms for maintaining Hainan Island's biodiversity and high-quality ecological…	2022	2025-11-01	Int J Environ Res Public Health	19	23		36497740	10.3390/ijerph192315665		#191	Geng 2022	Exclusion reason: Does not meet inclusion criteria ;
Where are mines located insub SaharanAfrica and how have they expanded overtime?	Ahmed, Abdulkareem I.; Bryant, Robert G.; Edwards, David P.	Mining is a multi-billion-dollar industry spanning major to artisanal and small-scale mines, with diverse local to regional socio-economic and environmental impacts. Sub Saharan Africa (SSA) has large deposits of minerals, which has made it a global epicenter for investors in the extractive industries. Here, we identified and mapped 469 company-owned and community-managed mines across SSA, most o…	2020		Land Degradation & Development	32	1	112-122		10.1002/ldr.3706		#192	Ahmed 2020	Exclusion reason: Missing intervention: No PAs involved;
Overfishing reduces resilience of kelp beds to climate-driven catastrophic phase shift	Ling, S. D.; Johnson, C. R.; Frusher, S. D.; Ridgway, K. R.	A key consideration in assessing impacts of climate change is the possibility of synergistic effects with other human-induced stressors. In the ocean realm, climate change and overfishing pose two of the greatest challenges to the structure and functioning of marine ecosystems. In eastern Tasmania, temperate coastal waters are warming at approximately four times the global ocean warming average, …	2009	2029-12-01	Proc Natl Acad Sci U S A	106	52	22341-5	20018706	10.1073/pnas.0907529106		#193	Ling 2009	Exclusion reason: Biodiversity metric only;
Protected areas in tropical Africa: assessing threats and conservation activities	Tranquilli, S.; Abedi-Lartey, M.; Abernethy, K.; Amsini, F.; Asamoah, A.; Balangtaa, C.; Blake, S.; Bouanga, E.; Breuer, T.; Brncic, T. M.; Campbell, G.; Chancellor, R.; Chapman, C. A.; Davenport, T. R.; Dunn, A.; Dupain, J.; Ekobo, A.; Eno-Nku, M.; Etoga, G.; Furuichi, T.; Gatti, S.; Ghiurghi, A.; Hashimoto, C.; Hart, J. A.; Head, J.; Hega, M.; Herbinger, I.; Hicks, T. C.; Holbech, L. H.; Huijbr…	Numerous protected areas (PAs) have been created in Africa to safeguard wildlife and other natural resources. However, significant threats from anthropogenic activities and decline of wildlife populations persist, while conservation efforts in most PAs are still minimal. We assessed the impact level of the most common threats to wildlife within PAs in tropical Africa and the relationship of conse…	2014		PLoS One	9	12	e114154	25469888	10.1371/journal.pone.0114154		#194	Tranquilli 2014	Exclusion reason: Does not meet inclusion criteria ;
Assessing the Nature Reserve Management Effort Using an Expert-Based Threat Analysis Approach	Battisti, C.; Fanelli, G.; Marini, F.; Amori, G.; Luiselli, L.	In this note, we suggest the adoption of expert-based approaches for threat analysis to allow an assessment of the magnitude of efforts of wildlife management actions. Similar to what is proposed for expert-based quantification of threat events, in wildlife management this approach can be applied by assigning a score to the extent of the areas affected by management, their frequency and intensity…	2020	Apr	Diversity-Basel	12	4		WOS:000533906300015	ARTN 145_x000D_10.3390/d12040145		#197	Battisti 2020	Exclusion reason: Limitations in outcome measurement;
Reservoirs of richness: least disturbed tropical forests are centres of undescribed species diversity	Giam, X.; Scheffers, B. R.; Sodhi, N. S.; Wilcove, D. S.; Ceballos, G.; Ehrlich, P. R.	In the last few decades, there has been a remarkable discovery of new species of plants, invertebrates and vertebrates, in what have been called the new age of discovery. However, owing to anthropogenic impacts such as habitat conversion, many of the still unknown species may go extinct before being scientifically documented (i.e. 'crypto-extinctions'). Here, by applying a mathematical model of s…	2012	2007-01-01	Proc Biol Sci	279	1726	67-76	21593037	10.1098/rspb.2011.0433		#198	Giam 2012	Exclusion reason: Does not meet inclusion criteria ;
Baseline coral disease surveys within three marine parks in Sabah, Borneo	Miller, J.; Sweet, M. J.; Wood, E.; Bythell, J.	Two of the most significant threats to coral reefs worldwide are bleaching and disease. However, there has been a scarcity of research on coral disease in South-East Asia, despite the high biodiversity and the strong dependence of local communities on the reefs in the region. This study provides baseline data on coral disease frequencies within three national parks in Sabah, Borneo, which exhibit…	2015		PEERJ	3		e1391	26732905	10.7717/peerj.1391		#199	Miller 2015	Exclusion reason: No comparator - No control or implemented intervention;
Greater Focus Needed on Alien Plant Impacts in Protected Areas	Hulme, P. E.; Pysek, P.; Pergl, J.; JarosÃ­k, V.; Schaffner, U.; VilÃ , M.	Alien plants pose significant threats to protected areas worldwide yet many studies only describe the degree to which these areas have become invaded. Research must move toward a better understanding of alien plant impacts sincemanagers urgently require an appropriate evidence base to prioritize control/eradication targets. We analyze a global database of quantitative studies of alien plant impac…	2014	Sep-Oct	CONSERVATION LETTERS	7	5	459-466	WOS:000344373500005	10.1111/conl.12061		#200	Hulme 2014	Exclusion reason: Does not meet inclusion criteria ;
Spatio-temporal estimation of the anthropogenic environmental stress intensity in the Three-River-Source National Park region, China	Zhou, K.; Wu, J. Y.; Liu, H. C.	Through the construction of national parks to optimize the ecological, production and living space structures, ecological assets can be converted into ecological product values under the premise of maximizing the protection of the original natural ecological environment. In this way, multiple regional economic, social and ecological benefits can be realized. Of course, unreasonable and high-inten…	2021	Oct 10	JOURNAL OF CLEANER PRODUCTION	318			WOS:000725268100002	ARTN 128476_x000D_10.1016/j.jclepro.2021.128476		#202	Zhou 2021	Exclusion reason: Does not meet inclusion criteria ;
Africa's protected areas are brightening at night: A long-term light pollution monitor based on nighttime light imagery	Zheng, Z. H.; Wu, Z. F.; Chen, Y. B. A.; Guo, G. H.; Cao, Z.; Yang, Z. W.; Marinello, F.	As the cornerstone of biodiversity conservation, the core value of protected areas (PAs) is to maintain an area's natural conditions (both day and night) and to restrict human-caused disturbances to biology and the environment. Although the value of PAs has been universally recognized, light pollution within them is worsening as a result of the widespread use of artificial illumination devices. P…	2021	Jul	GLOBAL ENVIRONMENTAL CHANGE-HUMAN AND POLICY DIMENSIONS	69			WOS:000683559500003	ARTN 102318_x000D_10.1016/j.gloenvcha.2021.102318		#203	Zheng 2021	Exclusion reason: Does not meet inclusion criteria ;
Spatiotemporal characteristics of landscape change in the coastal wetlands of Yancheng caused by natural processes and human activities	Zhang, H.; Liu, H.; Hao, J.; Yufeng, L.	Wetlands are one of most important ecological systems on earth. Their unique ecosystem function has led to them been sometimes called "the earth's filtration system". Coastal wetland is an important type of wetland, which is not only a rare ecosystem but is also often found in areas disturbed human activities. Landscape changes have become the most significant feature of this fragile zone. Landsc…				32						#205		Exclusion reason: Does not meet inclusion criteria ;
Impact of climate patterns, land-use types and exploitation on the population structure of_x000D__x000D__x000D_ Pellegr. and Vuillet in West African semi-arid savannas	Zerbo, I.; Salako, K. V.; Hounkpevi, A.; Zozoda, D.; Kakai, R. G.; Thiombiano, A.	Some multi-purpose woody species, although currently considered as "least concern" by the International Union for Conservation of Nature (IUCN), are undergoing several disturbances resulting from human overexploitation and changes in climate conditions and land-use types. The patterns of such disturbances are likely to vary across climate regions due to changes in socioecological context. However…	2023	Jun	GLOBAL ECOLOGY AND CONSERVATION	43			WOS:001041891000001	ARTN e02434_x000D_10.1016/j.gecco.2023.e02434		#206	Zerbo 2023	Exclusion reason: Does not meet inclusion criteria ;
Predictors of elephant poaching in a wildlife crime hotspot: The Ruvuma landscape of southern Tanzania and northern Mozambique	Zafra-Calvo, N.; Lobo, J. M.; Prada, C.; Nielsen, M. R.; Burgess, N. D.	Understanding the spatial distribution of elephant carcasses in relation to ecological characteristics and human activities is critical to developing targeted management strategies for reducing poaching. We employ a spatial modelling approach to quantify the relative contribution of multiple climatic, ecological, human and protected area management predictors of the number of elephant carcasses i…	2018	Feb	JOURNAL FOR NATURE CONSERVATION	41		79-87	WOS:000425777300009	10.1016/j.jnc.2017.11.006		#207	Zafra-Calvo 2018	Exclusion reason: Does not meet inclusion criteria ;
Temporal-spatial differentiation and its change in the landscape ecological security of wuyishan scenery district	You, W.; He, D.; Wu, L.; Hong, L. W. W.; Zhan, S.; Qin, D.; You, H.	Located in the northwestern part of Fujian Province, Wuyi Mountain is the most outstanding area for biodiversity conservation in southeast China and a refuge for a large number of ancient, relict species, many of them endemic to China. In December 1999, Wuyi Mountain was included on the World Natural and Cultural Heritage List by the 23rd Session of the World Heritage Committee of UNESCO and desc…				31						#208		Exclusion reason: Biodiversity metric only;
Combining different spatio-temporal resolution images to depict landscape dynamics and guide wildlife management	Xofis, P.; Poirazidis, K.	Raptors are emblematic species of high conservation value and significant ecological role. Their conservation is of particular importance and it relies on the conservation of their habitats and the constant monitoring of their dynamics. In the current study we investigate land cover changes over the period 2001-2011, in one of the most important reserves for raptor conservation in Europe, the Dad…	2018	Feb	BIOLOGICAL CONSERVATION	218		2017-10-01	WOS:000424177400002	10.1016/j.biocon.2017.12.003		#210	Xofis 2018	Exclusion reason: Limitations in outcome measurement;
Evaluation of ecological function of mangrove soil on absorbing heavy metals: A case study from the Dongzhaigang mangrove in China	Xin, K.; Huang, X.; Zhou, Q.; Chen, Z.	Mangroves are special plant communities that live along intertidal zones in tropical and subtropical areas. They are regarded as one of the most important types of natural ecosystem in the world because of the many ecosystem functions that they perform, of which water purification is the most complex. Mangrove ecosystems are conducive to the deposition and retention of heavy metals. So it is impo…				33						#211		Exclusion reason: Does not meet inclusion criteria ;
Increasing Mercury in Yellow Perch at a Hotspot in Atlantic Canada, Kejimkujik National Park	Wyn, B.; Kidd, K. A.; Burgess, N. M.; Curry, R. A.; Munkittrick, K. R.	In the mid-1990s, yellow perch (Perca flavescens) and common loons (Gavia immer) from Kejimkujik National Park and National Historic Site (KNPNHS), Nova Scotia, Canada, had among the highest mercury (Hg) concentrations across North America. In 2006 and 2007, we re-examined 16 lakes to determine whether there have been changes in Hg in the loon's preferred prey, yellow perch. Total Hg concentratio…				44						#212		Exclusion reason: No comparator - No control or implemented intervention;
Effects of Land-Cover Change on Soil Erosion in the Saxon Switzerland National Park Region	Wolf, S.; Walz, U.; Kleber, A.	Land-cover patterns changed significantly during the last century due to anthropogenic impact. This also affected soil erosion rates. Changes in land-cover patterns influence slope lengths and, thus, erosional displacement. However, this effect is not yet well quantified. There are various established approaches for the empirical modelling of soil erosion, but none seems appropriate to sufficient…	2009		Erde	140	2	155-174	WOS:000272232800005			#214	Wolf 2009	Exclusion reason: No comparator - No control or implemented intervention;
The impact of introduced predators on two threatened prey species: A case study from western New South Wales	Wheeler, R.; Priddel, D.	Since European settlement, many Australian mammals have become extinct; numerous others survive within substantially reduced ranges. Predation by the Red Fox (Vulpes vulpes) and House Cat (Felis catus) are two of the major drivers of this decline. The demise of Australia's native fauna continues, with ground-nesting birds such as the Malleefowl (Leipoa ocellata) now being at greatest risk of exti…				10						#215		Exclusion reason: Does not meet inclusion criteria ;
Paddling impacts on aquatic macrophytes in inland waterways	Wegner, B.; Meyer, N.; Wolter, C.	Paddling benefits people's health and wellbeing but can impose pressure on aquatic ecosystems. Negative effects intensify if many recreationists simultaneously use the same waterbody, sites, or sections and at high intensity. Therefore, especially waterbodies attracting high numbers of people are threatened to become ecologically degraded. We examined effects of paddling on aquatic macrophytes in…	2023	Apr	JOURNAL FOR NATURE CONSERVATION	72			WOS:000923730800001	ARTN 126331_x000D_10.1016/j.jnc.2023.126331		#216	Wegner 2023	Exclusion reason: Biodiversity metric only;
Correlates of wildlife snaring patterns in Tsavo West National Park, Kenya	Wato, Y. A.; Wahungu, G. M.; Okello, M. M.	Habitat loss and hunting are currently the twin threats to wildlife across the world. Hunting is such a threat across the tropics that some recent studies have estimated wildlife extraction at six times the sustainable rate in parts of Africa. The traditional methods of wildlife hunting, like setting traps and snares are no longer sustainable as the reasons for hunting are largely moving from sub…	2006	Oct	BIOLOGICAL CONSERVATION	132	4	500-509	WOS:000241348900009	10.1016/j.biocon.2006.05.010		#217	Wato 2006	Exclusion reason: Does not meet inclusion criteria ;
A multi-scale assessment of local and contextual threats to existing and potential U.S. protected areas	Wade, A. A.; Theobald, D. M.; Laituri, M. J.	Assessing threats to protected areas is a critical step to ensure effective resource conservation and to leverage future conservation actions. It is equally important to assess external and internal threats because human activities both in and around a protected area can impair the area's ecological goals or impart important ecological benefits to adjacent lands. We applied a threat framework tha…				101						#219		Exclusion reason: No comparator - No control or implemented intervention; Katherine Pulido Chadid (2024-07-25 20:26:19)(Select): Super relevant study for context (Ch2);
Yellow-legged gull eggs (Larus michahellis) as persistent organic pollutants and trace metal bioindicator for two nearby areas with different human impact	ViÃ±as, L.; Besada, V.; PÃ©rez-FernÃ¡ndez, B.; Bode, A.	The concentration of different persistent organic pollutants (POPs including chlorinated and brominated compounds) and trace metals and metalloids (As, Cd, Cu, Cr, Pb, Hg, Ni, and Zn) was examined in eggs from two colonies of yellow-legged gulls. The two colonies are established in RÃ­a de Vigo, Northwest Spain, with a distance between them of only 10 km, one in Vigo town (industrial and harbour …				190						#220		Exclusion reason: Does not meet inclusion criteria ;
ROV-based monitoring of passive ecological recovery in a deep-sea no-take fishery reserve	Vigo, M.; Navarro, J.; Aguzzi, J.; Bahamon, N.; Garcia, J. A.; Rotllant, G.; Recasens, L.; Company, J. B.	In the context of marine conservation, trawl fishing activity is the most important ecosystem stressor in demersal Mediterranean waters. Limited management measures in bottom trawling have caused deep-sea stocks of the iconic Norway lobster Nephrops norvegicus to decrease over the last decade. This crustacean acts as an umbrella species for co-existing megafauna. Here, we used non-invasive Remote…	2023	2020-07-01	Sci Total Environ	883		163339	37087018	10.1016/j.scitotenv.2023.163339		#221	Vigo 2023	Exclusion reason: Biodiversity metric only;
Environmental governance and conservation. Experiences in two natural protected areas of Mexico and Costa Rica	VÃ¡zquez-Villa, B. M.; Reyes-HernÃ¡ndez, H.; Leija-Loredo, E. G.; Rivera-GonzÃ¡lez, J. G.; Morera-Beita, C.	Natural protected areas are recognized as key to the conservation of biodiversity and to face deforestation. Their effectiveness requires both an integrated model and the social participation of local actors. The present study analyzes the deforestation process and its relationship with governance at the Sierra de la Abra Tanchipa Biosphere Reserve (RBSAT), Mexico, and Piedras Blancas National Pa…				15						#222		Exclusion reason: Does not meet inclusion criteria ;
Multi-scale estimation of the effects of pressures and drivers on mangrove forest loss globally	Turschwell, M. P.; Tulloch, V. J. D.; Sievers, M.; Pearson, R. M.; Andradi-Brown, D. A.; Ahmadia, G. N.; Connolly, R.; Bryan-Brown, D.; Lopez-Marcano, S.; Adame, M. F.; Brown, C. J.	Human activities that threaten ecosystems often vary across small spatial scales, though they can be driven by large-scale factors like national governance. Here, we use two decades of data on global mangrove deforestation to assess whether landscape-scale indirect pressures - cumulative impacts, population density, mangrove forest fragmentation, the global human footprint - and management respon…	2020	Jul	BIOLOGICAL CONSERVATION	247			WOS:000540247600025	ARTN 108637_x000D_10.1016/j.biocon.2020.108637		#224	Turschwell 2020	Exclusion reason: Does not meet inclusion criteria ;
Monitoring land use change in the West Mediterranean region of Turkey: A case study on Antalya-Turkey coast	SÃ¶nmez, N. K.; Sari, M.	Remote Sensing (RS) and Geographic Information System (GIS) technologies offer suitable tools for long-term monitoring and assessment of land-use change. Turkey's Western Mediterranean region is an area of national and international economic importance from natural, agricultural, historical and tourism perspectives. Recognizing these facts, this study aims to identify and highlight temporal land-…				16						#226		Exclusion reason: Article not found;
Management effectiveness in a freshwater protected area: Long-term water quality response to catchment-scale land use changes	Staponites, L. R.; Simon, O. P.; BartÃ¡k, V.; BÃ­ly, M.	As freshwater environments become increasingly threatened, the need for efficient and effective protection grows more urgent. Yet quantitative evidence of management effectiveness within freshwater protected areas is limited, inhibiting our ability to infer the practicality and efficacy of practices. Herein, we employ linear mixed-effects models and time series models to evaluate the connection b…	2022	Nov	ECOLOGICAL INDICATORS	144			WOS:000855943000005	ARTN 109438_x000D_10.1016/j.ecolind.2022.109438		#227	Staponites 2022	Exclusion reason: No comparator - No control or implemented intervention;
Investigating the impact of a long-term research and conservation project on the expansion of land use and land cover in a remote area of central DRC	Soliday, Valeska; Louat, Alexis; Miezi, EspÃ©rence; Fruth, Barbara	Anthropogenic impact and population growth have caused a dramatic loss of biodiversity worldwide. Defores-tation due to logging, mining, and burning are of particular severity in tropical rainforests with the Amazonian and Congolese basins harboring the largest reminders on our planet. While research projects particularly those with permanent presence on ground have been considered as excellent c…	2023	Mar	Trees, Forests and People	11			WOS:000992298700001	10.1016/j.tfp.2022.100368		#228	Soliday 2023	Exclusion reason: Missing intervention: No PAs involved;
Climate change and regional human pressures as challenges for management in oceanic islands, South Atlantic	Soares, M. O.	This study aimed to determine the main anthropogenic pressures and the effectiveness of management practices in marine protected areas (MPAs) (Rocas Atoll and Fernando de Noronha Archipelago, South Atlantic). The MPAs exhibited high management effectiveness over the last 25â€¯years due to the control of local pressures (i.e., fishing and tourism). However, the increase in regional and global pres…	2018	Jun	Mar Pollut Bull	131	Pt A	347-355	29886957	10.1016/j.marpolbul.2018.04.008		#229	Soares 2018	Exclusion reason: Does not meet inclusion criteria ;
ASSESSMENT OF ANTHROPOGENIC IMPACT ON FOREST ECOSYSTEM: A CASE STUDY OF KUMBHALGARH WILDLIFE SANCTUARY, INDIA	Singh, B. V. R.; Sen, A.; Mishra, R.; Prasad, R.	In the era of the modern world, natural resources are continuously diminishing and simultaneously the human population is also increasing, which is alarming for the present and future world. Global biodiversity is playing a pivotal role in all ecosystem services, meanwhile, anthropogenic activities and encroachment are the main drivers for the widespread loss of local biodiversity. In India, Kumb…				16						#230		Exclusion reason: No comparator - No control or implemented intervention;
Tuberculosis and Brucellosis in Wood Bison (Bison Bison Athabascae) in Northern Canada: A Renewed Need to Develop Options for Future Management	Shury, T. K.; Nishi, J. S.; Elkin, B. T.; Wobeser, G. A.	Effective, long-term strategies to manage the threat of bovine tuberculosis and brucellosis spillback from northern, diseased bison to the Canadian cattle herd and adjacent disease-free wood bison (Bison bison athabascae) herds have eluded policy makers in recent decades. A controversial plan to depopulate infected herds and repopulate them with disease-free wood bison was rejected in 1990 becaus…	2015	Jul	J Wildl Dis	51	3	543-54	25973624	10.7589/2014-06-167		#231	Shury 2015	Exclusion reason: Does not meet inclusion criteria ;
Dynamics and determinants of household's non-timber forest products collection in the giant panda nature reserves of China	Shen, J. Y.; Zhang, Y. J.; Zhou, W.; Song, Z. J.; Duan, W.	Although the contributions of non-timber forest products (NTFPs) to poverty alleviation and resource conservation are widely acknowledged, NTFP collection is still one of the leading human activities threatening the habitats of giant pandas. This study thus explores the dynamics and determinants of household's participation in, income from, and reliance on NTFP collection in the panda reserves. D…	2022	Apr	FOREST POLICY AND ECONOMICS	137			WOS:000788069400004	ARTN 102705_x000D_10.1016/j.forpol.2022.102705		#232	Shen 2022	Exclusion reason: Does not meet inclusion criteria ;
Mammal conservation in Amazonia's protected areas: A case study of Peru's Ichigkat Muja - Cordillera del CÃ³ndor National Park	Scullion, J. J.; Fahrenholz, J.; Huaytalla, V.; Rengifo, E. M.; Lang, E.	The protected areas of the Amazon Basin provide a core refuge for many threatened forest mammals species, but their effectiveness in wildlife conservation is poorly documented. To better understand the impact of protected areas on mammal conservation in the Amazon Basin, this study evaluates the diversity, abundance, and conservation status of medium and large forest mammals in a borderland secto…				26						#235		Exclusion reason: Does not meet inclusion criteria ;
Impact of land-use type and harvesting on population structure of a non-timber forest product-providing tree in a semi-arid savanna, West Africa	Schumann, K.; Wittig, R.; Thiombiano, A.; Becker, U.; Hahn, K.	Non-timber forest products (NTFPs) strongly contribute to livelihood security in the semi-arid tropics. Main factors determining the populations of NTFP-providing species are human activities. This study examined the impact of land-use, combined with rates and patterns of debarking and chopping on a NTFP-providing tree (Anogeissus leiocarpa) in Burkina Faso. We compared stands in a protected area…	2011	Sep	BIOLOGICAL CONSERVATION	144	9	2369-2376	WOS:000294030900029	10.1016/j.biocon.2011.06.018		#236	Schumann 2011	Exclusion reason: Biodiversity metric only;
The realities of regional resource management: Glacier National Park and its neighbors revisited	Sax, J. L.; Keiter, R. B.	Twenty years ago Glacier National Park was considered the park most at risk from external threats, such as mining and timber harvesting on adjacent lands. This finding led to an earlier Article that examined whether Glacier officials were effectively defending the park from these external threats. We concluded that the park's non-confrontational strategies were tenuous at best, but that some prot…	2006		ECOLOGY LAW QUARTERLY	33	2	233-311	WOS:000240907000001			#238	Sax 2006	Exclusion reason: Does not meet inclusion criteria ;
Human impacts on forest structure and species richness on the edges of a. protected mountain forest in Uganda	Sassen, M.; Sheil, D.	We investigated how local scale variation in human impacts influenced forest structure and tree species richness within Mt Elgon National Park, Uganda. We assessed basal area (BA), stem density, diameter at breast height (dbh) and indicators of human activity in 343 plots in four study sites, on transects running inwards from the boundary of the park. Mt Elgon hosts the only remaining natural for…	2013	2001-11-01	Forest Ecology and Management	307		206-218	WOS:000326770200021	DOI 10.1016/j.foreco.2013.07.010		#239	Sassen 2013	Exclusion reason: Biodiversity metric only;
Assessing the effectiveness of protected areas against habitat fragmentation and loss: A long-term multi-scalar analysis in a mediterranean region	Santiago-Ramos, J.; Feria-Toribio, J. M.	Landscape fragmentation and human-induced land-cover changes are two of the main current threats to nature conservation. To face such challenges, the development of networks of Protected Areas (PAs) has become a central element of nature conservation policies. The main objective of this study is to evaluate the effectiveness of PAs against long-term natural habitat fragmentation and loss at a reg…	2021	Dec	JOURNAL FOR NATURE CONSERVATION	64			WOS:000710186300004	ARTN 126072_x000D_10.1016/j.jnc.2021.126072		#240	Santiago-Ramos 2021	Exclusion reason: Limitations in outcome measurement;
Hunting or habitat degradation? Decline of primate populations in Udzungwa Mountains, Tanzania: An analysis of threats	Rovero, F.; Mtui, A. S.; Kitegile, A. S.; Nielsen, M. R.	Hunting and habitat degradation are universal threats to primates across the tropics, thus deciphering the relative impact of threats on population relative abundance is critical to predicting extinction risk and providing conservation recommendations. We studied diurnal primates over a period of nearly 6 years in the Udzungwa Mountains of Tanzania, a site of global importance for primate conserv…	2012	Feb	BIOLOGICAL CONSERVATION	146	1	89-96	WOS:000301814300010	10.1016/j.biocon.2011.09.017		#242	Rovero 2012	Exclusion reason: Limitations in outcome measurement;
Cumulative pressures and low protection: a concerning blend for Mediterranean MPAs	Rodriguez-Rodriguez, D.; Sanchez-Espinosa, A.; Schroder, C.; Abdul Malak, D.; Rodriguez, J.	This study classifies Mediterranean marine protected areas (MPAs) according to the combined result of pressure level and protection. Six major marine environment pressures were considered: pressures from fish farms, fishing, marine litter, pressures from marinas, pollution from maritime transport, and climate change. MPA protection was assessed through legal protection and management effort. Most…	2015	2015-12-01	Mar Pollut Bull	101	1	288-295	26563543	10.1016/j.marpolbul.2015.09.039		#244	Rodriguez-Rodriguez 2015	Exclusion reason: Missing comparator;
Land use in Brazilian continental wetland Ramsar sites	Ribeiro, S.; Moura, R. G.; Stenert, C.; FlorÃ­n, M.; Maltchik, L.	Wetlands are systems of high biological diversity, productivity, and high economic and social importance to mankind. Despite its importance, wetlands are very threatened by human activities. World-wide, wetlands receive international recognition since 1971 by the Ramsar Convention. Guidelines adopted by Brazil to include its wetlands into the Ramsar List require that Ramsar sites are legally prot…	2020	Dec	LAND USE POLICY	99			WOS:000594484300007	ARTN 104851_x000D_10.1016/j.landusepol.2020.104851		#247	Ribeiro 2020	Exclusion reason: Limitations in outcome measurement;
Patterns and causes of deforestation in protected areas of Rondonia-Brazil	Ribeiro, M. B. N.; VerÃ­ssimo, A.	The creation of protected areas is one of the most effective and recommended strategies to preserve the integrity and biodiversity of the Amazon forest. In the state of Rondonia, where deforestation has already reached 32% of the territory, protected areas represent the last barrier against environmental degradation. However, deforestation has even advanced in these areas. In this article, we ide…	2007	Apr	NATUREZA & CONSERVACAO	5	1	103-113	WOS:000249653800003	NA		#248	Ribeiro 2007	Exclusion reason: Article not found;
Conservation priorities of forest ecosystems: Evaluation of deforestation and degradation hotspots using geospatial techniques	Reddy, C. S.; Manaswini, G.; Satish, K. V.; Singh, S.; Jha, C. S.; Dadhwal, V. K.	Spatially explicit planning is required to set focused conservation priorities and assessing future ecological implications. Spatial ecological modeling and hotspot analysis prioritizes the forest ecosystems and supports the conservation of species level biodiversity. In the present study, the hotspots of deforestation and forest fires were obtained using historical deforestation trends (1975-198…	2016	Jun	ECOLOGICAL ENGINEERING	91		333-342	WOS:000374766500041	10.1016/j.ecoleng.2016.03.007		#249	Reddy 2016	Exclusion reason: Does not meet inclusion criteria ;
Eating away at protected areas: Total grazing pressure is undermining public land conservation	Prowse, T. A. A.; O'Connor, P. J.; Collard, S. J.; Rogers, D. J.	Protected areas are critical for the long-term conservation of biodiversity globally. Across agricultural landscapes, protected areas serve as refuges for threatened and declining species and provide valuable ecosystem services that support broader landscape function. However, increasing pressure on protected areas from a range of sources is undermining their unique conservation values. Much of t…	2019	Oct	GLOBAL ECOLOGY AND CONSERVATION	20			WOS:000498226800067	ARTN e00754_x000D_10.1016/j.gecco.2019.e00754		#250	Prowse 2019	Exclusion reason: No comparator - No control or implemented intervention;
Global Study of Protected Areas Management Effectiveness: the Brazilian perspective	Pavese, H. B.; Leverington, F.; Hockings, M.	The. expansion of Protected Areas systems-is urgently needed to ensure that further biodiversity losses, do not occur. The need to evaluate,the effectiveness of protected, area management has become well recognized over the past ten years, as we have seen that declaration, of protected areas does not always result in their adequate protection. Assessments have been carried out for different purpo…	2007	Apr	NATUREZA & CONSERVACAO	5	1	152-162	WOS:000249653800008	NA		#251	Pavese 2007	Exclusion reason: Does not meet inclusion criteria ;
Cornerstones of biodiversity conservation? Comparing the management effectiveness of Kruger and Kakadu National Parks, two key savanna reserves	Parr, C. L.; Woinarski, J. C. Z.; Pienaar, D. J.	How effective are large, well-resourced protected areas at achieving biodiversity conservation goals? In this study we critically review biodiversity research and management practice in two of the world's premier savanna reserves (Kruger National Park, South Africa and Kakadu National Park, Australia) by exploring management approaches to three shared conservation issues: fire, alien species and …				18						#252		Exclusion reason: Does not meet inclusion criteria ;
Anthropogenic impacts in the nearshore fish community of the Yucatan Coastal Corridor. A comparison of protected and unprotected areas	Palacios-SÃ¡nchez, S. E.; Vega-Cendejas, M. E.; HernÃ¡ndez-de-Santillana, J. M.; Aguilar-Medrano, R.	The establishment of protected areas is one of the few management tools available to combat the deleterious effect of anthropogenic impacts, however, studies of the fish community in both protected and disturbed environments are needed as evidence of the effectiveness of those protected areas. This study aims to characterize, evaluate, and compare the environment and fish community, through 24 lo…				51						#254		Exclusion reason: Biodiversity metric only;
The secondary impact of mining on primates and other medium to large mammals in forest reserves in southwestern Ghana	Owusu, E. H.; Ofori, B. Y.; Attuquayefio, D. K.	The upsurge of mining in Africa promises substantial economic development opportunities, but poses serious threats to the continent's natural environment and rich biodiversity. We assessed the impact of mining on medium to large mammals in the Western Region of Ghana. We surveyed mammals in the project area and two forest reserves (FRs) before the commencement of mining operations and 10 years af…	2018	Jan	EXTRACTIVE INDUSTRIES AND SOCIETY-AN INTERNATIONAL JOURNAL	5	1	114-121	WOS:000427996700016	10.1016/j.exis.2017.11.007		#255	Owusu 2018	Exclusion reason: Biodiversity metric only;
Environmental vulnerability assessment of eco-development zone of Great Himalayan National Park, Himachal Pradesh, India	Nandy', S.; Singh, C.; Das, K. K.; Kingma, N. C.; Kushwaha, S. P. S.	The Great Himalayan National Park (GHNP), located in western Himalaya, is a key mountainous ecosystem prone to environmental vulnerability because of anthropogenic stress and the natural disasters, viz., landslide and forest fire. We assessed the environmental vulnerability of the eco-development zone of GHNP using remote sensing (RS) and geographic information system (GIS) technologies. To quant…	2015	Oct	ECOLOGICAL INDICATORS	57		182-195	WOS:000358091800023	10.1016/j.ecolind.2015.04.024		#260	Nandy' 2015	Exclusion reason: Does not meet inclusion criteria ;
Marine protected areas enhance structural complexity but do not buffer the consequences of ocean warming for an overexploited precious coral	Montero-Serra, I.; Garrabou, J.; Doak, D. F.; Ledoux, J. B.; Linares, C.	Global warming and overexploitation both threaten the integrity and resilience of marine ecosystems. Many calls have been made to at least partially offset climate change impacts through local conservation management. However, a mechanistic understanding of the interactions of multiple stressors is generally lacking for habitat-forming species; preventing the development of sound conservation str…				56						#262		Exclusion reason: Does not meet inclusion criteria ;
The two facets of species sensitivity: Stress and disturbance on coralligenous assemblages in space and time	Montefalcone, M.; Morri, C.; Bianchi, C. N.; Bavestrello, G.; Piazzi, L.	Marine coastal ecosystems are affected by a vast array of human-induced disturbances and stresses, which are often capable of overwhelming the effects of natural changes. Despite the conceptual and practical difficulty in differentiating between disturbance and stress, which are often used interchangeably, the two terms bear different ecological meanings. Both are external agents, but the former …	2017	2015-04-01	Mar Pollut Bull	117	2025-02-01	229-238	28185652	10.1016/j.marpolbul.2017.01.072		#263	Montefalcone 2017	Exclusion reason: Biodiversity metric only;
Evidence of exotic trout mediated minnow invasion in Pyrenean high mountain lakes	MirÃ³, A.; Ventura, M.	Although high mountain lakes are naturally fishless, there have been numerous trout introductions to such ecosystems in many areas of the world with negative ecological consequences. In recent decades other fishes, such as minnows, have been introduced to some mountain areas, including the Pyrenees. These introductions may cause further ecological problems, since minnows also occupy the top of th…				17						#265		Exclusion reason: Does not meet inclusion criteria ;
Spatio-Temporal analysis of habitat change in and around lala bustard Sanctuary-Gujarat, India	Mehta, A.; Dutta, J.	Lala Bustard Sanctuary is a pristine patch of grassland that Is one of the few remaining habitats of the critically endangered Great Indian Bustard (Ardeoiis nigriceps) of Kachchh District in Gujarat state of India. The sanctuary covers a protected area of about2 sq. kms. and Is one of the smallest sanctuary in the country. A series of factors such as expanding agricultural landscapes, unplanned …				44						#268		Exclusion reason: Missing comparator;
Long-term monitoring of temperate macroalgal assemblages inside and outside a No take marine reserve	Medrano, A.; Linares, C.; Aspillaga, E.; Capdevila, P.; Montero-Serra, I.; Pages-Escola, M.; Zabala, M.; Hereu, B.	Macroalgal communities have an essential role in the shallow benthic habitats of temperate seas, where changes in their composition can resonate through entire coastal ecosystems. As all major ecosystems on Earth, algal beds have already been affected by multiple disturbances. Passive conservation tools, such as marine protected areas or No-take zones, have the potential to reduce some of the ant…	2020	Jan	Mar Environ Res	153		104826	31703945	10.1016/j.marenvres.2019.104826		#269	Medrano 2020	Exclusion reason: Biodiversity metric only;
Invasive alien species in Mediterranean Marine Protected Areas: the Egadi Islands (Italy) case study	Mannino, A. M.; Balistreri, P.	Invasive alien species (IAS) are one of the most severe threats to Mediterranean Sea biodiversity. Currently, the eï¬€ectiveness of Marine Protected Areas (MPAs) in providing protection for marine biodiversity from IAS is still not fully understood. Here, we analysed eight Mediterranean MPAs located in a strategic geographic position within the Mediterranean basin. All the analysed MPAs were affe…				22						#271		Exclusion reason: No comparator - No control or implemented intervention;
Human and livestock encroachments into the habitat of Mountain Nyala (_x000D_) in the Bale Mountains National Park, Ethiopia	Mamo, Y.; Bekele, A.	A study to assess the impacts of livestock grazing and human encroachments on the habitat of Mountain Nyala (Tragelaphus buxtoni) was carried out in the Bale Mountains National Park, Ethiopia during 2003-2005. Parameters such as the presence or absence of both livestock and Mountain Nyala dung, extent of browsing, vegetation height and evidence of wood extraction by the local communities were ass…	2011	Sep	TROPICAL ECOLOGY	52	3	265-273	WOS:000293678100004			#272	Mamo 2011	Exclusion reason: Does not meet inclusion criteria ;
Assessment and management of cumulative impacts in California's network of marine protected areas	Mach, M. E.; Wedding, L. M.; Reiter, S. M.; Micheli, F.; Fujita, R. M.; Martone, R. G.	In response to concerns about human impacts to coastal ecosystems, conservationists and practitioners are increasingly turning to networks of marine protected areas (MPAs). Although MPAs manage for fishing pressure, many species and habitats in MPAs remain exposed to a multitude of stressors, including stressors from global climate change and regional land-and ocean-based activities. To support t…	2017	2001-03-01	Ocean & Coastal Management	137		2025-11-01	WOS:000394077000001	10.1016/j.ocecoaman.2016.11.028		#274	Mach 2017	Exclusion reason: Does not meet inclusion criteria ;
Road mediated spatio-temporal tree decline in traditional agroforests in an African biosphere reserve	M'Woueni, Daniel; Gaoue, G. Orou; Balagueman, O. Rodrigue; Biaou, S.S. Honore; Natta, K. Armand	Understanding the role of protected areas in conserving biodiversity is a central goal in conservation biology. Anthropogenic activities around and inâ€¦	2019		GLOBAL ECOLOGY AND CONSERVATION	20		e00796		10.1016/j.gecco.2019.e00796		#275	M'Woueni 2019	Exclusion reason: Does not meet inclusion criteria ;
Human Impact Upon Nitrogen Geochemistry in Landscapes of Byelorussia, Ussr	Lukashev, K. I.; Onoshko, M. P.	This paper deals with the problems of nitrogen geochemistry as exemplified by Byelorussia, where boggy landscapes overlying glacial deposits are widespread. At the same time, Byelorussia is a region with well developed industry and agriculture. Mean contents of nitrogen and its modes of occurrence (organic nitrogen, ammonium, nitrates, nitrites) were studied in soils, waters, plants, etc. Both na…	1989	Sep-Oct	Applied Geochemistry	4	5	437-444	WOS:A1989CG73200001	Doi 10.1016/0883-2927(89)90001-2		#277	Lukashev 1989	Exclusion reason: Limitations in outcome measurement;
Evaluating the spatial intensity and demographic impacts of wire-snare bush-meat poaching on large carnivores	Loveridge, A. J.; Sousa, L. L.; Seymour-Smith, J.; Hunt, J.; Coals, P.; O'Donnell, H.; Lindsey, P. A.; Mandisodza-Chikerema, R.; Macdonald, D. W.	The bush-meat poaching crisis is a significant threat to biodiversity in tropical forest and savannah biomes, however its impacts on wild animal populations are often difficult to quantify across large spatial scales. Using data from 17 camera trap survey sites in southern Africa, within the Kavango-Zambezi (KAZA) Transfrontier Conservation Area, we show it is possible to assess the demographic i…	2020	Apr	BIOLOGICAL CONSERVATION	244			WOS:000526787400012	ARTN 108504_x000D_10.1016/j.biocon.2020.108504		#278	Loveridge 2020	Exclusion reason: Biodiversity metric only;
Using fuzzy analytic hierarchy process for spatio-temporal analysis of eco-environmental vulnerability change during 1990â€“2010 in Sanjiangyuan region, China	Liu, D.; Cao, C.; Dubovyk, O.; Tian, R.; Chen, W.; Zhuang, Q.; Zhao, Y.; Menz, G.	Sanjiangyuan region, which located in the north of Qinghai-Tibet Plateau in China, is characterized by an extreme environment and is subject to the impacts of climate change and intense human activities. To protect the eco-environment in Sanjiangyuan, the Sanjiangyuan National Nature Reserve (SNNR) was established in 2000, and an ecological project was initiated in 2005. Comprehensive and quantit…				73						#281		Exclusion reason: Does not meet inclusion criteria ;
Assessment of ecological stress caused by maritime vessels based on a comprehensive model using AIS data: Case study of the Bohai Sea, China	Liu, B. J.; Wu, X. Q.; Liu, X.; Gong, M.	Increased maritime vessel activity has adversely affected the conservation of marine environments. The mobility and diverse operations of vessels increase the difficulty of marine spatial planning and protected-area management. This study proposed a ?source-pathway-carrier-impact-response? (SPCIR) model to describe marine ecological stress caused by vessels (VES) and constructed a comprehensive a…	2021	Jul	ECOLOGICAL INDICATORS	126			WOS:000647804300003	ARTN 107592_x000D_10.1016/j.ecolind.2021.107592		#282	Liu 2021	Exclusion reason: Does not meet inclusion criteria ;
Habitat destruction and poaching threaten the Sumatran tiger in Kerinci Seblat National Park, Sumatra	Linkie, M.; Martyr, D. J.; Holden, J.; Yanuar, A.; Hartana, A. T.; Sugardjito, J.; Leader-Williams, N.	The Sumatran tiger, categorized as Critically Endangered on the 2002 IUCN Red List, is threatened by poaching for domestic and international markets, by prey depletion from human hunting and by habitat loss from illegal and commercial logging, oil palm production, pioneer farming, mining operations and forest fires. Kerinci Seblat National Park (KSNP) in west-central Sumatra still has large block…	2003	Jan	Oryx	37	1	41-48	WOS:000182554500017	10.1017/S0030605303000103		#283	Linkie 2003	Exclusion reason: Limitations in outcome measurement;
Is Indonesian peatland loss a cautionary tale for Peru? A two-country comparison of the magnitude and causes of tropical peatland degradation	Lilleskov, E.; McCullough, K.; Hergoualcâ€™h, K.; del Castillo Torres, D.; Chimner, R.; Murdiyarso, D.; Kolka, R.; Bourgeau-Chavez, L.; Hribljan, J.; del Aguila Pasquel, J.; Wayson, C.	Indonesia and Peru harbor some of the largest lowland tropical peatland areas. Indonesian peatlands are subject to much greater anthropogenic activity than Peruâ€™s, including drainage, logging, agricultural conversion, and burning, resulting in high greenhouse gas and particulate emissions. To derive insights from the Indonesian experience, we explored patterns of impact in the two countries, an…				24						#284		Exclusion reason: Does not meet inclusion criteria ;	Missing comparator: No control / implemented intervention
Mapping human influence intensity in the Tibetan Plateau for conservation of ecological service functions	Li, S. C.; Zhang, Y. L.; Wang, Z. F.; Li, L. H.	Human activities pose severe threats to ecosystems. As the Earth's third pole, the Tibetan Plateau (TP) provides various ecosystem services for human beings, including water resources for nearly 40% of the world's population. In this study, four categories of human pressures on the environment were analyzed firstly and then summed cumulatively to map the human influence intensity (HII) in the TP …	2018	Apr	ECOSYSTEM SERVICES	30		276-286	WOS:000432655100010	10.1016/j.ecoser.2017.10.003		#285	Li 2018	Exclusion reason: Missing intervention: No PAs involved;
Distinguishing the impact of tourism development on ecosystem service trade-offs in ecological functional zone	Li, L.; Feng, R.; Xi, J.; Huijbens, E. H.; Gao, Y.	Tourism in ecological functional zones (EFZs) is rapidly becoming an increasing trend; however, its impact on ecosystem services remains poorly understood owing to the absence of a consistent quantification framework. This study uses the Taihang Mountains (THM), an EFZ in China, as an example to develop a framework for evaluating the direct and indirect impact pathways of scenic spots on the trad…	2023	2015-09-01	J Environ Manage	342		118183	37216874	10.1016/j.jenvman.2023.118183		#287	Li 2023	Exclusion reason: Does not meet inclusion criteria ;
Increasing livestock grazing, the unintended consequence of community development funding on giant panda habitat	Li, B. B. V.; Kim, M. J.; Xu, W. H.; Jiang, S. W.; Yu, L.	Indirect approaches such as Integrated Conservation and Development Projects (ICDP) aspire to combat biodiversity loss. Unfortunately, with increasing cases of failure, the link between poverty alleviation and conservation is now controversial. We revisited the earliest ICDP project in China after 12 years. The project area experienced increasing free-ranging livestock after 2004, which degraded …	2021	May	BIOLOGICAL CONSERVATION	257			WOS:000663302800008	ARTN 109074_x000D_10.1016/j.biocon.2021.109074		#289	Li 2021	Exclusion reason: Does not meet inclusion criteria ;
World Heritage in danger: Big data and remote sensing can help protect sites in conflict zones	Levin, N.; Ali, S.; Crandall, D.; Kark, S.	World Heritage sites provide a key mechanism for protecting areas of universal importance. However, fifty-four UNESCO sites are currently listed as "In Danger", with 40% of these located in the Middle East. Since 2010 alone, thirty new sites were identified as under risk globally. We combined big-data and remote sensing to examine whether they can effectively be used to identify danger to World H…	2019	Mar	GLOBAL ENVIRONMENTAL CHANGE-HUMAN AND POLICY DIMENSIONS	55		97-104	WOS:000463982000009	10.1016/j.gloenvcha.2019.02.001		#290	Levin 2019	Exclusion reason: Does not meet inclusion criteria ;
Domestic dogs in protected areas: a threat to Brazilian mammals?	Lessa, Isadora; CorrÃªa Seabra GuimarÃ£es, Tainah; de Godoy Bergallo, Helena; Cunha, AndrÃ©; M. Vieira, Emerson	The presence of domestic dogs (Canis lupus familiaris) in Brazilian protected areas is fairly frequent. The interaction of such dogs with native animals leads to population declines for many species, particularly carnivores. In this paper the main threats dogs bring about Brazilian biodiversity are assessed with a focus on protected areas. We collected information from papers on the interaction o…	2016		NATUREZA & CONSERVACAO	14	2	46-56		10.1016/j.ncon.2016.05.001		#291	Lessa 2016	Exclusion reason: Does not meet inclusion criteria ;
Interactions between outdoor recreation and iconic terrestrial vertebrates in two French alpine national parks	Lavorel, S.; Rey, P. L.; Grigulis, K.; Zawada, M.; Byczek, C.	Protected areas manage synergies and trade-offs associated with core missions of nature protection while supporting education, recreation and tourism. In this paper we demonstrate how spatial modelling co-produced with managers can support the assessment of interactions between two cultural services: outdoor recreation and iconic terrestrial vertebrates. In two French national parks (Ecrins and V…	2020	Oct	ECOSYSTEM SERVICES	45			WOS:000582464800008	ARTN 101155_x000D_10.1016/j.ecoser.2020.101155		#293	Lavorel 2020	Exclusion reason: Does not meet inclusion criteria ;
How to effectively use long-term remotely sensed data to analyze the process of tree and shrub encroachment into open protected wetlands	KopeÄ‡, D.	Succession caused by agricultural land abandonment is one of the most serious threats to the biodiversity of non-forest ecosystems in Europe. The aim of the study conducted in the Biebrza National Park (NE Poland) was to develop a remote sensing method to analyze the process of tree and shrub encroachment into the open peatland area of the Lower Biebrza Basin of 245 km2. The study covered a perio…				125						#296		Exclusion reason: Does not meet inclusion criteria ;
Impacts of ski pistes preparation and ski tourism on vegetation	KÅ‡AzoviÄŒOvÃ¡, L.; ChasnÃKovÃ¡, S.; NovÃ¡k, J.; BaranÄok, P.	Vegetation of the ski slopes in the Low Tatras National Park in Slovakia was evaluated through the environmental variables and species composition caused by human impact assessment. We compared the grasslands located on pistes, off pistes and on the edge of pistes, and within these we also recorded the grassland management. The results show that the majority of study areas managed by transport of…				37						#297		Exclusion reason: No comparator - No control or implemented intervention;
Ecological significance of land-cover based on interpretation of human-tourism impact. A case from two different protected areas (Slovakia and Serbia)	KlauÄo, M.; Weis, K.; Stankov, U.; Arsenovic, D.; MarkoviÄ‡, V.	This study analyses landscape components and human activities, in two different protected landscapes. The main purpose of this work is to measure landscape elements, mainly land cover patches within tourism zones. Outputs of the landscape quantification are numerical values, which is possible to interpret toward to the quality of an on-going ecologic process in landscape. The interpretation of th…				7						#298		Exclusion reason: Does not meet inclusion criteria ;
Factors and ecological impacts of wildlife habitat destruction in the Serengeti ecosystem in northern Tanzania	Kideghesho, J. R.; Nyahongo, J. W.; Hassan, S. N.; Tarimo, T. C.; Mbije, N. E.	Despite the considerable worldwide efforts to establish the wildlife protected areas - a strategy construed as the most feasible in maintaining the high quality habitats for healthy wildlife populations - destruction of wildlife habitats has remained the leading threat to biodiversity. This destruction, taking different forms (i.e. degradation, fragmentation or outright loss) is a function of the…				11						#300		Exclusion reason: Does not meet inclusion criteria ;
Evaluating determinants of wire-snare poaching risk in the Boland Mountain Complex of South Africa	Kendon, T. A.; Comley, J.; Wilkinson, A.; Grobler, M. J.; Nieman, W. A.; Leslie, A. J.; O'Riain, M. J.; Naude, V. N.	Wire-snare poaching for bushmeat is increasingly recognised as a global threat to biodiversity and is directly linked to the reduction or extirpation of targeted species, threatened species bycatch and the loss of functional ecosystem processes. However, studies evaluating the extent and underlying dynamics of bushmeat poaching in southern Africa remain limited. Despite growing evidence of wire-s…	2022	Dec	JOURNAL FOR NATURE CONSERVATION	70			WOS:000891674600003	ARTN 126295_x000D_10.1016/j.jnc.2022.126295		#303	Kendon 2022	Exclusion reason: Does not meet inclusion criteria ;
Long term trends in floating plastic pollution within a marine protected area identifies threats for Endangered northern bottlenose whales	Kelly, N. E.; Feyrer, L.; Gavel, H.; Trela, O.; Ledwell, W.; Breeze, H.; Marotte, E. C.; McConney, L.; Whitehead, H.	â€œThe Gullyâ€, situated off Nova Scotia, Canada, is the largest submarine canyon in the western North Atlantic. This unique oceanographic feature, which became a Marine Protected Area (MPA) in 2004, is rich in marine biodiversity and is part of the critical habitat of Endangered northern bottlenose whales (Hyperoodon ampullatus). To understand the potential impact of plastic pollution in the MP…				227						#304		Exclusion reason: No comparator - No control or implemented intervention;	I; Missing comparator: No control / implemented intervention
Village size and forest disturbance in Bhadra Wildlife Sanctuary, western Ghats, India	Karanth, K. K.; Curran, L. M.; Reuning-Scherer, J. D.	Habitat fragmentation, land cover change and biodiversity loss are often associated with village communities in protected areas, but the extent and intensity of such impacts are often inadequately assessed. We record resource use and depletion by human inhabitants by conducting ecological surveys in six villages and social surveys in all 13 villages of varying sizes in India's Bhadra Wildlife San…	2006	Mar	BIOLOGICAL CONSERVATION	128	2	147-157	WOS:000236015200001	10.1016/j.biocon.2005.09.024		#305	Karanth 2006	Exclusion reason: No comparator - No control or implemented intervention;
Monitoring deforestation in Malaysia between 1985 and 2013: Insight from South-Western Sabah and its protected peat swamp area	Kamlun, K. U.; Arndt, R. B.; Phua, M. H.	Monitoring land cover changes provides an effective and accurate evaluation of deforestation rates that shed light on reducing emissions from deforestation and forest degradation (REDD) implementation. Located in Klias Peninsula, southwestern Sabah, Malaysia there lies a pristine peat swamp forest area. This type of ecosystem plays a significant role in global climate regulation. Despite its impo…	2016	1930-11-01	LAND USE POLICY	57		418-430	WOS:000382341200038	10.1016/j.landusepol.2016.06.011		#306	Kamlun 2016	Exclusion reason: No comparator - No control or implemented intervention;
Evaluating the benefits of a potential industrial symbiosis network within the boundaries of a protected area, using the method of life cycle assessment	Kakanis, I.; Gaidajis, G.	Anthropogenic activities within the boundaries of protected areas are creating challenges that can cause significant damage to the ecosystem and biodiversity. Especially on cases where heavy industrial activities take place within, or near, the boundaries of protected areas, the preservation of nature is at high risk. In this paper, we utilise the method of life cycle assessment (LCA) to assess t…				14						#307		Exclusion reason: Does not meet inclusion criteria ;
Spatiotemporal analysis of ecological vulnerability in the Tibet Autonomous Region based on a pressure-state-response-management framework	Jiang, Y. J.; Shi, B.; Su, G. J.; Lu, Y.; Li, Q. Q.; Meng, J.; Ding, Y. P.; Song, S.; Dai, L. W.	The Qinghai-Tibet Plateau is facing a crisis of ecological degradation against a background of global warming and the intensification of human activities. With the aim of evaluating the spatial and temporal distribution of ecological vulnerability, this study established a new comprehensive pressure-state-response-management (PSRM) model based on the differences in the relative importance of indi…	2021	Nov	ECOLOGICAL INDICATORS	130			WOS:000692561800007	ARTN 108054_x000D_10.1016/j.ecolind.2021.108054		#309	Jiang 2021	Exclusion reason: Does not meet inclusion criteria ;
Transmission lines are an under-acknowledged conservation threat to the Brazilian Amazon	Hyde, J. L.; Bohlman, S. A.; Valle, D.	The environmental impacts of energy generation plants, especially those with large dams, have been widely discussed in the Amazon region, but little attention has been paid to the impacts of the associated transmission lines. These impacts are likely to be substantial given the wide geographic extent of the lines and the relatively high forest cover in the traversed areas. Publicly available info…	2018	Dec	BIOLOGICAL CONSERVATION	228		343-356	WOS:000452815200037	10.1016/j.biocon.2018.10.027		#311	Hyde 2018	Exclusion reason: Does not meet inclusion criteria ;
Effectiveness of a deep-sea cold-water coral Marine Protected Area, following eight years of fisheries closure	Huvenne, V. A. I.; Bett, B. J.; Masson, D. G.; Le Bas, T. P.; Wheeler, A. J.	Pressure on deep-sea ecosystems continues to increase as anthropogenic activities move into ever deeper waters. To mitigate impacts on vulnerable habitats, various conservation measures exist, such as the designation of Marine Protected Areas (MPAs). So far, however, little evidence is available about their effectiveness. This paper presents a unique follow-up study assessing the status and recov…	2016	Aug	BIOLOGICAL CONSERVATION	200		60-69	WOS:000381325300008	10.1016/j.biocon.2016.05.030		#312	Huvenne 2016	Exclusion reason: Biodiversity metric only;
Assessment of Paraguay's forest cover change using Landsat observations	Huang, C. Q.; Kim, S.; Song, K.; Townshend, J. R. G.; Davis, P.; Altstatt, A.; Rodas, O.; Yanosky, A.; Clay, R.; Tucker, C. J.; Musinsky, J.	Comprehensive assessments of Paraguay's forest cover (FC) change from the 1970s to the 2000s using Landsat observations were conducted, including a wall-to-wall mapping of changes across the whole country between the 1990s and 2000s, and an assessment of forest area in the Atlantic Forest ecoregion in the 1970s using a systematic sampling approach. The derived wall-to-wall FC change map was evalu…	2009	May	Global and Planetary Change	67	2025-02-01	2025-12-01	WOS:000266754000002	10.1016/j.gloplacha.2008.12.009		#313	Huang 2009	Exclusion reason: Missing comparator;
Disentangling the influence of the economic development discourse on the management of national parks through systems thinking: Case studies from the Philippines and Mozambique	Horigue, Vera; Richards, Russell; Taju, Alima; Maina, Joseph	Globally, management of national parks has evolved to become more inclusive of stakeholders by incorporating socio-economic development objectives and shifting from strict protection to resource management. These strategies have worked in some contexts, but have also caused adverse unintended consequences such as ecosystem degradation and overexploitation inside many national parks in developing …	2023	Feb	LAND USE POLICY	125			WOS:000992270100001	10.1016/j.landusepol.2022.106499		#315	Horigue 2023	Exclusion reason: Does not meet inclusion criteria ;
The efficacy of combined educational and site management actions in reducing off-trail hiking in an urban-proximate protected area	Hockett, K. S.; Marion, J. L.; Leung, Y. F.	Park and protected area managers are tasked with protecting natural environments, a particularly daunting challenge in heavily visited urban-proximate areas where flora and fauna are already stressed by external threats. In this study, an adaptive management approach was taken to reduce extensive off-trail hiking along a popular trail through an ecologically diverse and significant area in the Ch…	2017	2001-12-01	J Environ Manage	203	Pt 1	17-28	28778002	10.1016/j.jenvman.2017.06.073		#316	Hockett 2017	Exclusion reason: Does not meet inclusion criteria ;
The forest spatial dynamics in the Bururi forest nature reserve, Burundi	Havyarimana, F.; Masharabu, T.; Kouao, J. K.; Bamba, I.; Nduwarugira, D.; Bigendako, M. J.; Hakizimana, P.; Mama, A.; Bangirinama, F.; Banyankimbona, G.; Bogaert, J.; De Canniere, C.	The studied forest is a protected area located in Southern Burundi, close to Bururi city and to agricultural villages. The effective protection of this forest started in 1980 but the protected area delimitation occurred in 2000. The forest spatial dynamic is analyzed to assess the effectiveness of this protection status. The study combines six Landsat multispectral satellite images analysis with …				35						#318		Exclusion reason: No comparator - No control or implemented intervention;
Polycyclic aromatic hydrocarbons in a Natural Heritage Estuary influenced by anthropogenic activities in the South Atlantic: Integrating multiple source apportionment approaches	Gurgatz, B. M.; Garcia, M. R.; Cabral, A. C.; de Souza, A. C.; Nagai, R. H.; Figueira, R. C. L.; de Mahiques, M. M.; Martins, C. C.	Polycyclic aromatic hydrocarbons (PAHs) were analysed in the sediments of one of the most well-preserved estuaries in South Brazil, the Paranagua Estuarine System (PES), using several source apportionment tools. The summation operatorPAH ranged from < DL to 125.6 ng g(-1) dw (dry weight) (average 29.9 +/- 26.1 ng g(-1) dw), and the lowest levels detected were similar to those found in other prote…	2023	Mar	Mar Pollut Bull	188		114678	36764149	10.1016/j.marpolbul.2023.114678		#320	Gurgatz 2023	Exclusion reason: Does not meet inclusion criteria ;
Surveys of lions Panthera leo in protected areas in Zimbabwe yield disturbing results: What is driving the population collapse?	Groom, R. J.; Funston, P. J.; Mandisodza, R.	The African lion Panthera leo is an iconic species but it has faced dramatic range reductions and possibly as few as 30,000 individuals remain in the wild. In the absence of detailed ground-based surveys, lion populations may be estimated using regression models based on prey biomass availability but these often overestimate lion densities as a result of a variety of compounding factors. Anthropo…				48						#323		Exclusion reason: Does not meet inclusion criteria ;
Study on the impacts of LULC change on the wildlife habitat and the livelihood of people in and around Dampa Tiger Reserve, Mizoram, India	Gouda, S.; Sethy, J.; Chauhan, N. S.; Bargali, H. S.	Anthropogenic activities are a matter of serious concern in the Indian Himalayan region due to adverse impacts on wildlife and habitats. This study examines resource use patterns by local people in relation to the habitat of Malayan Sun Bear in and around Dampa Tiger Reserve in Mizoram. Standard questionnaire surveys and vegetation sampling methods were used for data collection and analysis. It w…				13						#325		Exclusion reason: Does not meet inclusion criteria ;
Assessment of Parque Luro Reserve effectiveness as a conservation tool for the Pampean Caldenal: Landscape scale vegetation change between 1960 and 2004	GonzÃ¡lez-Roglich, M.; Villarreal, D.; Castro, M. G.	Protected areas are the main conservation tool being used to favor the preservation of natural ecosystems worldwide. However, it is notorious the scarcity of objective assessments on their effectiveness and long term conservation potential. The Caldenal is one of the most threatened ecosystems in Argentina, being in the margins of the Pampas agricultural region, conversion to croplands is its big…				22						#326		Exclusion reason: Does not meet inclusion criteria ;
Measuring the effectiveness of protected area management by comparing habitat utilization and threat dynamics	Gong, M. H.; Fan, Z. Y.; Zhang, X. M.; Liu, G.; Wen, W. Y.; Zhang, L.	The conservation outcomes of a protected area depend on management actions. The effectiveness of protected area management remains a concern for donors and policy-makers. However, very few feasible methods assessing the ability and performance of management teams have been developed. Behavioral shifts in habitat usage, direct and sensitive wildlife responses to threats, have been ignored in the e…	2017	Jun	BIOLOGICAL CONSERVATION	210		253-260	WOS:000405881600027	10.1016/j.biocon.2017.04.027		#328	Gong 2017	Exclusion reason: Limitations in outcome measurement;
Changes in protected area management effectiveness over time: A global analysis	Geldmann, J.; Coad, L.; Barnes, M.; Craigie, I. D.; Hockings, M.; Knights, K.; Leverington, F.; Cuadros, I. C.; Zamora, C.; Woodley, S.; Burgess, N. D.	Protected area coverage has reached over 15% of the global land area. However, the quality of management of the vast majority of reserves remains unknown, and many are suspected to be "paper parks". Moreover, the degree to which management can be enhanced through targeted conservation projects remains broadly speculative. Proven links between improved reserve management and the delivery of conser…	2015	Nov	BIOLOGICAL CONSERVATION	191		692-699	WOS:000364257100078	10.1016/j.biocon.2015.08.029		#330	Geldmann 2015	Exclusion reason: Limitations in outcome measurement;
A network approach to migratory whale conservation: Are MPAs the way forward or do all roads lead to the IMO?	Geijer, C. K. A.; Jones, P. J. S.	The objective of this paper was to analyse the challenges and prospects of regional MPA networks as an effective tool for the protection of wide-ranging cetaceans, focusing on the potential of the Specially Protected Areas of Mediterranean Importance (SPAMI) network initiative to contribute to the conservation of the Mediterranean fin whale (Balaenoptera physalus). One of the main threats to this…	2015	Jan	Marine Policy	51		2025-12-01	WOS:000348003700001	10.1016/j.marpol.2014.06.002		#331	Geijer 2015	Exclusion reason: Does not meet inclusion criteria ;
Historical analysis (2000-2005) of the coastal water quality in San Andres Island, SeaFlower Biosphere Reserve, Caribbean Colombia	Gavio, B.; Palmer-Cantillo, S.; Mancera, J. E.	To understand the coastal water quality of San Andres Island, and provide tools for the management of its marine resources, we present the historical analysis of the island monitoring, which includes ammonia, nitrites, nitrate, phosphates, fecal and total coliforms. The anthropogenic pressure on the coastal system is heavy, with water nutrification, posing at risk seagrass and coral ecosystems. D…	2010	Jul	Mar Pollut Bull	60	7	1018-30	20219216	10.1016/j.marpolbul.2010.01.025		#332	Gavio 2010	Exclusion reason: Does not meet inclusion criteria ;
Are protected areas truly protected? The impact of road traffic on vertebrate fauna	Garriga, N.; Santos, X.; Montori, A.; Richter-Boix, A.; Franch, M.; Llorente, G. A.	The extension of road networks is considered one of the major factors affecting fauna survival. Roadkill has been documented widely and affects all taxonomic groups. Although roadkill is associated mainly with traffic density, some life-history traits of species and the area surrounding roads are expected to modify number of roadkills both taxonomically and geographically. Here we studied the num…				21						#333		Exclusion reason: Biodiversity metric only;
How far from a pristine state are the peatlands in the BiaÅ‚owieÅ¼a Primeval Forest (CE Europe) â€“ Palaeoecological insights on peatland and forest development from multi-proxy studies	GaÅ‚ka, Mariusz; Knorr, Klaus-Holger; Tobolski, Kazimierz; Gallego-Sala, Angela; KoÅ‚aczek, Piotr; Lamentowicz, Mariusz; KajukaÅ‚o-Drygalska, Katarzyna; Marcisz, Katarzyna	The BiaÅ‚owieÅ¼a Primeval Forest is one of the most pristine forested and peatland areas in Europe, as recognized by its status as the World Biosphere Reserve. Palaeoecological analyzes offer the possibility of establishing a record of ecosystem change over time, and therefore setting reference conditions for their assessment, protection and restoration. To assess the impact of hydrological chang…	2022		ECOLOGICAL INDICATORS	143				10.1016/j.ecolind.2022.109421		#334	GaÅ‚ka 2022	Exclusion reason: Does not meet inclusion criteria ;
Land use intensification rather than land cover change affects regulating services in the mountainous Adige river basin (Italy)	Gaglio, M.; Aschonitis, V.; Castaldelli, G.; Fano, E. A.	Land Cover (LC) and Land Use (LU) changes are usually considered as one change, limiting the understanding of their individual effects on Ecosystem Services (ESs). The aim of this study is to investigate the different effects of LC change and LU intensification on four regulating ESs (carbon storage, water regulation and supply, nitrogen retention) using the InVEST model in the mountainous Adige …	2020	Oct	ECOSYSTEM SERVICES	45			WOS:000582464800001	ARTN 101158_x000D_10.1016/j.ecoser.2020.101158		#335	Gaglio 2020	Exclusion reason: Missing comparator;
How are native vegetation and reserves affected by different road types in a southeastern Brazilian state?	Freitas, S. R.; Sousa, C. O. M.; Boscolo, D.; Metzger, J. P.	Reducing connectivity, road networks may threaten the effectiveness of natural reserves, thus, representing a critical conservation matter. This work aims to: 1) evaluate the relationship between native vegetation cover and road distance; 2) evaluate the extent to which native vegetation and nature reserves are affected by roads. Our study area was a neotropical landscape in the state of SÃ£o Pau…				17						#336		Exclusion reason: Does not meet inclusion criteria ;
Assessment and impact of anthropogenic disturbances in protected areas of northern Togo	Fousseni, F.; Marra, D.; Wala, K.; Batawila, K.; Zhang, C. y; Zhao, X. h; Akpagana, K.	These days, human activities in the savanna and the remaining dry and riparian forests of the Sudanian ecoregions continue to have their impact. These anthropogenic practices are still the main cause of disturbances in these areas. In order to investigate and assess the importance of these disturbances, caused by people bordering on protected areas and to determine the relation between these acti…				14						#337		Exclusion reason: Limitations in outcome measurement;
Deforestation in a complex landscape: La Amistad Biosphere Reserve	Forrestel, A.; Peay, K. G.	Deforestation is often the primary threat to conservation goals in tropical countries. However, accessing the remote locations in which most remaining forests of conservation value occur makes it difficult to quantify deforestation trends and to galvanize preventive action. Using remotely sensed images we were able to quantify rates of forest loss in La Amistad Biosphere Reserve, Panama. Annual d…				22						#338		Exclusion reason: No comparator - No control or implemented intervention;	I; Missing comparator: No control / implemented intervention
Nha Trang Bay marine protected area, Vietnam: Initial trends in coral structure and some preliminary linkages between these trends and human activities (2002-2005)	Dung, L. D.	Nha Trang Bay marine protected area was establishted in 2002 as a pilot initiative to enable adequate management of the reef communities, while providing opportunities for alternative income to the local community. A re-assessment of the data obtained during the baseline survey performed in 2002 and of an inventory performed in 2005 indicates a reasonable decline in hard coral structure in the ma…	2009		Aquatic Ecosystem Health & Management	12	3	249-257	WOS:000270156100004	10.1080/14634980903146767		#341	Dung 2009	Exclusion reason: Article not found;
A Change Detection Analysis in the Izmir Bird Paradise: Integration of Remote Sensing and Geographic Information System	Dogru, A. O.; Balcik, F. B.; Sanli, F. B.; Goksel, C.; Ulugtekin, N.	Wetlands are one of the most important natural areas of the world, since they provide habitats to various kinds of animals and plants, some of which are endemic and perform vital ecosystem services, including carbon sequestration, water quality protection, anti flood mitigation. Unfortunately, wetlands are destroyed by human-induced effects such as urbanization and pollution._x000D_Turkey has sev…	2009		FRESENIUS ENVIRONMENTAL BULLETIN	18	1	51-56	WOS:000264263700008			#342	Dogru 2009	Exclusion reason: Biodiversity metric only;
Monitoring landscape fragmentation and aboveground biomass estimation in Can Gio Mangrove Biosphere Reserve over the past 20 years	Do, A. N. T.; Tran, H. D.; Ashley, M.; Nguyen, A. T.	Over the past 20 years, the mangrove landscape of Can Gio Mangrove Biosphere Reserve (MBR) has undergone drastic changes in space and time. However, we know very little about changes in mangrove landscape model characteristics from analysis of different aspects based on landscape fragmentation. In the present study, the temporal and spatial changes of landscape pattern of land use/land cover (LUL…	2022	Sep	Ecological Informatics	70			WOS:000828147900004	ARTN 101743_x000D_10.1016/j.ecoinf.2022.101743		#343	Do 2022	Exclusion reason: No comparator - No control or implemented intervention;
Protected areas effectiveness in maintaining viable giant anteater (_x000D_) populations in an agricultural frontier	Diniz, M. F.; Brito, D.	The protected areas are essential for the conservation of native biota. However, only the protected area establishment does not guarantee the persistence of threatened species. Here, we assessed the efficiency of the Cerrado protected areas in maintaining viable populations of giant anteater and analyzed the impact of roadkills. We used the software VORTEX to model the viability of giant anteater…	2015	Jul-Dec	NATUREZA & CONSERVACAO	13	2	145-151	WOS:000368260400008	10.1016/j.ncon.2015.08.001		#344	Diniz 2015	Exclusion reason: Biodiversity metric only;
Spatio-Temporal Dynamics in Land Use and Habitat Fragmentation within a Protected Area Dedicated to Tourism in a Sudanian Savanna of West Africa	Dimobe, K.; Goetze, D.; OuÃ©draogo, A.; Forkuor, G.; Wala, K.; Porembski, S.; Thiombiano, A.	Nazinga Game Ranch (NGR) is a reserve in Burkina Faso involving local communities for securing biodiversity through sustainable management. Yet, its ecosystems are threatened by increasing number of elephants and illegal human activities. Renowned as a model of wildlife participatory management, NGR has mainly been studied for its animal wildlife only. The aim of this study was to uncover ecologi…				10						#345		Exclusion reason: Missing comparator;
Trends and drivers of land use/cover change in W National park in Burkina Faso	Dimobe, K.; Gessner, U.; Ouedraogo, K.; Thiombiano, A.	Burkina Faso's W National Park (WNPB) is one of the country's biodiversity hotspots. Despite this Park's protection, illegal human activities threaten its vegetation, and little information about the on-site causes of degradation is available. Here we explored the extent and drivers of changes in land use/land cover (LULC) in the WNPB. For this purpose, we used Landsat (1988, 2001 and 2016), and …	2022	Dec	Environmental Development	44			WOS:000877515700001	ARTN 100768_x000D_10.1016/j.envdev.2022.100768		#346	Dimobe 2022	Exclusion reason: Missing comparator;
Emerging issues for protected and conserved areas in Canada	Dietz, S.; Beazley, K. F.; Lemieux, C. J.; St Clair, C.; Coristine, L.; Higgs, E.; Smith, R.; Pellatt, M.; Beaty, C.; Cheskey, E.; Cooke, S. J.; Crawford, L.; Davis, R.; Forbes, G.; Gadallah, F.; Kendall, P.; Mandrak, N.; Moola, F.; Parker, S.; Quayle, J.; Ray, J. C.; Richardson, K.; Smith, K.; Snider, J.; Smol, J. P.; Sutherland, W. J.; Vallillee, A.; White, L.; Woodley, A.	Horizon scanning is increasingly used in conservation to systematically explore emerging policy and management issues. We present the results of a horizon scan of issues likely to impact management of Canadian protected and conserved areas over the next 5-10 years. Eighty-eight individuals participated, representing a broad community of academics, government and nongovernment organizations, and f…	2021	2025-11-01	FACETS	6		1892-1921	WOS:000723551500001	10.1139/facets-2021-0072		#347	Dietz 2021	Exclusion reason: Limitations in outcome measurement;
Satellite-Based Temporal Assessment of a Dried Lake: Case Study of Akgol Wetland	Dervisoglu, A.; Musaoglu, N.; Tanik, A.; Seker, D. Z.; Kaya, S.	Wetlands are well-known with their rich biological diversity and economic value beyond their significant functions like serving as nesting and breeding areas for the migrating birds and maintaining partial treatment of wastewater. Turkey, as a signatory of the Ramsar Convention, has committed to protect its valuable and numerous wetlands and to utilize them more rationally. Akgol Wetland is locat…	2017		FRESENIUS ENVIRONMENTAL BULLETIN	26	1	352-359	WOS:000395724000048	NA		#348	Dervisoglu 2017	Exclusion reason: No comparator - No control or implemented intervention; Katherine Pulido Chadid (2024-07-26 21:44:46)(Select): Ask;	I; Missing comparator: No control / implemented intervention
Anthropogenic impacts on forest land use and land cover change: Modelling future possibilities in the Himalayan Terai	Deb, S.; Debnath, M. K.; Chakraborty, S.; Weindorf, D. C.; Kumar, D.; Deb, D.; Choudhury, A.	The northern part of West Bengal, India partially falls within the Terai region of Himalaya. This region is distinctive in terms of high forest cover and rich biodiversity, but also features increasing human population, agricultural practices, and subsequent human-wildlife conflict. This study evaluated the impact of anthropogenic and agricultural proliferation on land use and land cover (LULC) t…	2018	Mar	ANTHROPOCENE	21		32-41	WOS:000429091500003	10.1016/j.ancene.2018.01.001		#349	Deb 2018	Exclusion reason: No comparator - No control or implemented intervention;
Coral damage by recreational diving activities in a Marine Protected Area of India: Unaccountability leading to â€˜tragedy of the not so commonsâ€™	De, K.; Nanajkar, M.; Mote, S.; Ingole, B.	Globally, coral reefs have drastically degraded due to local and global environmental stressors. Concurrently, coral reef tourism is rapidly growing in developing economies, which is one of many anthropogenic stressors impacting reefs. At the Malvan Marine Sanctuary, a Marine Protected Area (MPA) on the West coast of India, we investigated the impact of recreational diving on the reef from 2016 t…				155						#350		Exclusion reason: No comparator - No control or implemented intervention;	I; Missing comparator: No control / implemented intervention
Spatial and temporal effects of management on the reef seascape of a marine protected area in the Mexican Caribbean	Cruz-VÃ¡zquez, C.; Rioja-Nieto, R.; Enriquez, C.	Ecological degradation on Marine Protected Areas (MPAs) still occur as a result of anthropogenic pressure and environmental variation. Considering that protected areas can be restrictive to human activities, it is essential to assess their effectiveness. In this study, we evaluated the spatial and temporal effects of management on the seascape of the Cozumel Reefs National Park (CRNP) in the Mexi…				169						#352		Exclusion reason: Biodiversity metric only;
Description of the vessel traffic within the north Pelagos Sanctuary: Inputs for Marine Spatial Planning and management implications within an existing international Marine Protected Area	Coomber, F. G.; D'IncÃ , M.; Rosso, M.; Tepsich, P.; di Sciara, G. N.; Moulins, A.	International shipping, although considered a safe and environment-friendly form of transportation, has many direct and indirect impacts on cetaceans in many ways, particularly in the Mediterranean Sea, one of the world's busiest waterways. An MS receiver located at 44.30 degrees N and 8.45 degrees E, operating between 3 May 2013 and 31 October 2014, provided a detailed description of the distrib…	2016	Jul	Marine Policy	69		102-113	WOS:000377228800011	10.1016/j.marpol.2016.04.013		#353	Coomber 2016	Exclusion reason: No comparator - No control or implemented intervention;
Coral community decline at a remote Caribbean island: Marine no-take reserves are not enough	Coelho, V. R.; Manfrino, C.	1. Coral reefs around the world have been deteriorating over decades owing to anthropogenic pressure. In the Caribbean recent rates of decline are alarming, particularly for coral reefs under high local human impact, many of which are severely degraded, although regions with lower direct anthropogenic influence seem less affected. 2. Little Cayman is a relatively undeveloped island, with less tha…				17						#357		Exclusion reason: Biodiversity metric only;
Representation does not necessarily reduce threats to biodiversity: Australia's Commonwealth marine protected area system, 2012â€“2018	Cockerell, Brayden; Pressey, Robert L.; Grech, Alana; Ãlvarez-Romero, Jorge G.; Ward, Trevor; Devillers, Rodolphe	In 2012, Australia proclaimed a national marine protected area (MPA) system the National Representative System of MPAs (NRSMPA). Following a change in federal government, the system underwent two major revisions: an independent review released in 2015, and a final plan designed by the Director of National Parks implemented in 2018. We used all three iterations of the NRSMPA, from 2012 to 2018, to…	2020		BIOLOGICAL CONSERVATION	252				10.1016/j.biocon.2020.108813		#358	Cockerell 2020	Exclusion reason: Does not meet inclusion criteria ;
Mountain farmers' livelihoods and perceptions of forest resource degradation at Machiara National Park, Pakistan-administered Kashmir	Cochard, R.; Dar, M. E. U. I.	High human pressures on Pakistan's Himalayan forests necessitate effective preservation of representative natural areas. Adjacent to Machiara National Park (MNP, 138 km(2), established in 1996) live > 55,000 farmers who traditionally used park areas for grazing livestock and extracting forest products. Baseline information was needed for improved conservation plans of MNP and development extensio…	2014	Apr	Environmental Development	10		84-103	WOS:000218746100006	10.1016/j.envdev.2014.01.004		#359	Cochard 2014	Exclusion reason: Does not meet inclusion criteria ;
How effective are the protected areas of the natura 2000 network in halting biological invasions? A case study in Greece	Christopoulou, A.; Fyllas, N. M.; Dimitrakopoulos, P. G.; Arianoutsou, M.	Invasive alien plant species represent an important threat to various protected areas of the world, and this threat expected to be further enhanced due to climate change. This is also the case for the most important network of protected areas in Europe, the Natura 2000 network. In the current study we evaluated the distribution pattern of alien plant taxa across selected continental and insular N…				10						#361		Exclusion reason: No comparator - No control or implemented intervention;	I; Missing comparator: No control / implemented intervention
Underwater acoustic impacts of shipping management measures: Results from a social-ecological model of boat and whale movements in the St. Lawrence River Estuary (Canada)	Chion, C.; Lagrois, D.; Dupras, J.; Turgeon, S.; McQuinn, I. H.; Michaud, R.; MÃ©nard, N.; Parrott, L.	The recovery of whale species at risk requires the implementation of protection measures designed to mitigate the risks posed by various stressors. In the St. Lawrence Estuary (Canada), several whale species are threatened by navigation activities in various ways. Since 2013, seasonal voluntary ship strike mitigation measures, including a speed reduction area (SRA) and a no-go area, were implemen…	2017	2024-06-01	ECOLOGICAL MODELLING	354		72-87	WOS:000402354600008	10.1016/j.ecolmodel.2017.03.014		#362	Chion 2017	Exclusion reason: Does not meet inclusion criteria ;
20 years of landscape dynamics within the world's largest multinational network of protected areas	CheÅ£an, M. A.; Dornik, A.	The world's largest network of protected areas (PAs), Natura 2000, is facing different types of disturbances and pressures, however, it still remains unclear the impact they have on the conservation status of sites. Remote sensing big data analysis and satellite data were used to quantify dynamics of the dominant land cover category, landscape structure, and vegetation greenness, as indicators of…				280						#363		Exclusion reason: Does not meet inclusion criteria ;
Can the establishment of a protected area improve the lacustrine environment? A case study of Lake Chaohu, China	Chen, P.; Luo, J.; Xiong, Z.; Wan, N.; Ma, J.; Yuan, J.; Duan, H.	Eutrophication of lacustrine environments with frequent cyanobacterial blooms has become a serious problem. Overpopulation and runoff into groundwater and lakes from fertilizers with too much nitrogen and phosphorous have caused most of the problems. Here, we first devised a land use and cover classification system based on the local characteristics of the first-level protected area of Lake Chaoh…				342						#364		Exclusion reason: No comparator - No control or implemented intervention;
Implications of land cover change on ecosystems services and people's dependency: A case study from the Koshi Tappu Wildlife Reserve, Nepal	Chaudhary, S.; Chettri, N.; Uddin, K.; Khatri, T. B.; Dhakal, M.; Bajracharya, B.; Ning, W.	Protected areas, a corestone of biodiversity conservation, provide a vast array of ecosystem services to support livelihoods of people. However, protected areas, especially freshwater, are under threat with overexploitation of resources changing the land covers and degrading their capacity to supply services. Information on land cover changes and its implications on ecosystems, its services and p…	2016	Dec	ECOLOGICAL COMPLEXITY	28		200-211	WOS:000390724300019	10.1016/j.ecocom.2016.04.002		#365	Chaudhary 2016	Exclusion reason: Does not meet inclusion criteria ;
Effects of illegal logging on Amazonian medium and large-sized terrestrial vertebrates	Carvalho, E. A. R.; MendonÃ§a, E. N.; Martins, A.; Haugaasen, T.	Selective logging is a major form of land use in tropical rainforests, with more than half of the world's tropical forest already explored. In the Brazilian Amazon, most logging operations are illegal and highly damaging to forests. However, the effects of illegal logging on wildlife are poorly studied. Here we investigate the effects of illegal logging on the assemblage of medium- to large-bodie…	2020	2015-06-01	Forest Ecology and Management	466			WOS:000530639700007	ARTN 118105_x000D_10.1016/j.foreco.2020.118105		#366	Carvalho 2020	Exclusion reason: Limitations in outcome measurement;
The extent of buildings in wildland vegetation of the conterminous U.S. and the potential for conservation in and near National Forest private inholdings	Carlson, A. R.; Radeloff, V. C.; Helmers, D. P.; Mockrin, M. H.; Hawbaker, T. J.; Pidgeon, A.	Development in natural areas is a leading threat to biodiversity. Global conservationists have called for the expansion of protected areas to preserve wildlands that are free from buildings, and in the U.S., the â€˜America the Beautifulâ€™ initiative aims to protect 30% of land and water areas by 2030 (known as the â€˜30x30â€™ target). Here, we determined opportunities and limitations for conserv…				237						#367		Exclusion reason: Does not meet inclusion criteria ;
Does forest management and researchers' presence reduce hunting and forest exploitation by local communities in Tsitongambarika, south-east Madagascar?	Campera, M.; Phelps, M.; Besnard, F.; Balestri, M.; Eppley, T. M.; Nijman, V.; Donati, G.	Hunting of wildlife is one of the major threats to biodiversity. For effective conservation programmes in countries where hunting and shifting agriculture are the main sources of subsistence, forest management should aim to reduce hunting pressure and forest exploitation. The presence of researchers has been promoted as one of the main ways to mitigate anthropogenic pressures on wildlife populati…				53						#368		Exclusion reason: Missing intervention: No PAs involved;
Two species, one snare: Analysing snare usage and the impacts of tiger poaching on a non-target species, the Malayan tapir	Campbell, K.; Martyr, D.; Risdianto, D.; Clemente, C. J.	The illegal trade in tiger bones and body parts is crippling the remaining populations of tigers worldwide, but what effect does this trade have on other wildlife that get caught in the cross fire? The Malayan tapir (Tapirus indicus) is the only species of tapir found outside of South America, yet little is known of this subspecies despite its large size. Aside from habitat loss and an encroachin…	2019	Mar	BIOLOGICAL CONSERVATION	231		161-166	WOS:000459357500018	10.1016/j.biocon.2019.01.009		#369	Campbell 2019	Exclusion reason: Does not meet inclusion criteria ;
Five major invasive alien tree species in European Union forest habitat types of the Alpine and Continental biogeographical regions	Campagnaro, T.; Brundu, G.; Sitzia, T.	Invasive alien species are a threat to protected areas, species, and habitats worldwide. At the European level, the control of invasive alien species is a major goal of the EU Biodiversity Strategy, and a cornerstone, in this sense, is the Regulation (EU) no.l 43/2014 on invasive alien species. In this study, we focus on the Alpine and Continental biogeographical regions of Europe (defined in art…	2018	Jun	JOURNAL FOR NATURE CONSERVATION	43		227-238	WOS:000436467400025	10.1016/j.jnc.2017.07.007		#370	Campagnaro 2018	Exclusion reason: Does not meet inclusion criteria ;
Quotas regulation is necessary but not sufficient to mitigate the impact of SCUBA diving in a highly visited marine protected area	CalÃ², A.; PereÃ±iguez, J. M.; Hernandez-Andreu, R.; GarcÃ­a-Charton, J. A.	When effectively managed, Marine Protected Areas (MPAs) can produce wide ecosystem benefits that can foster, directly and indirectly, local economies. Tourism is one of the sectors mainly benefited by the effect of conservation. SCUBA diving represents an important tourism activity, especially in the context of MPAs, where it is one of the few activities often fostered rather than limited, for it…				302						#371		Exclusion reason: Biodiversity metric only;
A multidisciplinary integrated approach using Pachygrapsus marmoratus to assess the impact of port activities on mediterranean marine protected areas	Caliani, I.; Cannicci, S.; Pretti, C.; Baratti, M.; Contini, G.; Vitale, M.; Casini, S.; Fossi, M. C.; Iannucci, A.; Fratini, S.	The establishment of marine protected areas is considered the main global strategy to halt the loss of marine biodiversity. Since most of marine areas are open systems, this form of habitat protection cannot prevent their contamination due to human activities performed outside of their borders. Innovative approaches to assess the health status of protected marine habitats are therefore needed. He…	2023	Jan	CHEMOSPHERE	312	Pt 1	137129	36356813	10.1016/j.chemosphere.2022.137129		#372	Caliani 2023	Exclusion reason: Does not meet inclusion criteria ;
Conservation and conflict in the Democratic Republic of Congo: The impacts of warfare, mining, and protected areas on deforestation	Butsic, V.; Baumann, M.; Shortland, A.; Walker, S.; Kuemmerle, T.	Tropical forests provide critical ecosystem services worldwide. Nonetheless, ongoing agricultural expansion, timber extraction, and mining continue to jeopardize important forest resources. In addition, many tropical forests reside in countries that have experienced violent conflict in recent decades, posing an additional, yet poorly understood threat. Conflict may decrease or increase deforestat…	2015	Nov	BIOLOGICAL CONSERVATION	191		266-273	WOS:000364257100030	10.1016/j.biocon.2015.06.037		#373	Butsic 2015	Exclusion reason: Limitations in outcome measurement;
Viability assessment of the Wami-Mbiki Game Reserve to Nyerere National Park wildlife corridor in southern Tanzania	Bukombe, J.; Marealle, W.; Kimaro, J.; Kija, H.; Kavana, P.; Kakengi, V.; Nindi, J.; Keyyu, J.; Ntalwila, J.; Kilimba, N.; Bwenge, F.; Nkwabi, A.; Lowassa, A.; Sanare, J.; Mwita, M.; Leweri, C.; Kohi, E.; Mangewa, L.; Juma, R.; Okick, R.; Lobora, A.	Wildlife corridors are critical for the effective conservation of wildlife and for enhancing ecosystem services. Unfortunately, increased human pressure has increased the risk of species extinction in wildlife corridors. Studies on wildlife corridor connectivity have always used Geographical information systems (GIS) and remote sensing (RS) without information from ground surveys thus lacking com…	2022	Nov	GLOBAL ECOLOGY AND CONSERVATION	39			WOS:000867417400005	ARTN e02259_x000D_10.1016/j.gecco.2022.e02259		#374	Bukombe 2022	Exclusion reason: Biodiversity metric only;
Mangroves on the edge: Anthrome-dependent fragmentation influences ecological condition (Turbo, Colombia, Southern Caribbean)	Blanco-Libreros, J. F.; Estrada-Urrea, E. A.	Marine protected areas are commonly seen as the most effective strategy for protecting mangroves from external human pressures but little is known about the role of public land-tenure contexts (dense settlements, agricultural or range lands and wild anthromes) on clearing rates, patch properties, and ecological condition. We addressed the following questions using a peri-urban to wild gradient al…				7						#376		Exclusion reason: Missing intervention: No PAs involved;
Alien species threat across marine protected areas of turkeyâ€”an updated inventory	BilecenoÄŸlu, M.; Ã‡Ä±nar, M. E.	E. Abstract: This study presents the first comprehensive assessment of alien species occurrences within the selected 11 Marine Protected Areas (MPAs) located on the Aegean and Levantine coasts of Turkey. The inventory includes a total of 289 species belonging to 15 phyla, in which lowest and highest diversities were observed in Saros Bay MPA (27 species, northern Aegean Sea) and Fethiye-GÃ¶cek Ba…				9						#377		Exclusion reason: Does not meet inclusion criteria ;
Comparative study of pristine and polluted estuaries in Souss Massa National Park (Morocco): Implications for conservation strategies	Ben-Haddad, M.; Abelouah, M. R.; Hajji, S.; Bergayou, H.; Rangel-Buitrago, N.; Alla, A. A.	Estuaries are among the ecosystems most affected by human actions worldwide. Economic development in Morocco puts pressure on these aquatic systems, making them vulnerable. This study compares the state of benthic communities between a pristine estuary (Massa estuary) and a polluted one (Souss estuary). Both ecosystems belong to the Souss Massa National Park (SMNP), registered in the Ramsar list …	2023	Jul	Mar Pollut Bull	192		115053	37210989	10.1016/j.marpolbul.2023.115053		#378	Ben-Haddad 2023	Exclusion reason: Does not meet inclusion criteria ;	Does not meet inclusion criteria
Environmental predictors of forest change: An analysis of natural predisposition to deforestation in the tropical Andes region, Peru	Bax, V.; Francesconi, W.	The spatial patterns of deforestation are usually non-randomly distributed across the landscape. While anthropogenically driven processes are often addressed in land-use regulation policies and deforestation research, less attention is given to the environmental factors that influence tropical deforestation. This study investigates to what extent climate conditions (temperature and precipitation)…	2018	Feb	Applied Geography	91		99-110	WOS:000427340900010	10.1016/j.apgeog.2018.01.002		#379	Bax 2018	Exclusion reason: Does not meet inclusion criteria ;
A spatial and temporal assessment of energy development around wilderness areas	Aycrigg, J. L.; McCarley, T. R.; Martinuzzi, S.; Belote, R. T.; Bosher, M.; Bailey, C.; Reeves, M.	Global efforts to protect biodiversity have fallen short and global threats, including energy development, are prevalent. Assessing impacts of energy development helps determine if protected areas, particularly wilderness areas, can conserve biodiversity, natural habitats, and sustain ecological processes inherent in ecosystems. We quantified the amount of energy development around wilderness are…	2023	Mar	BIOLOGICAL CONSERVATION	279			WOS:000926840800001	ARTN 109907_x000D_10.1016/j.biocon.2023.109907		#381	Aycrigg 2023	Exclusion reason: Missing intervention: No PAs involved;
Assessing change in habitat composition, ecosystem functioning and service supply in Latvian protected stony reefs	Armoskaite, A.; Aigars, J.; Andersone, I.; Hansen, H. S.; Schroder, L.; Strake, S.	Healthy and diverse marine ecosystems are a source of a whole range of ecosystem services (ES) and social, and economic benefits. To preserve and restore biodiversity, and sustain service supply, an international goal was set to protect at least 10 % of the global coastal and marine area by 2020. The goal has been achieved mainly through the designation of marine protected areas (MPAs). Whilst ac…	2021	2015-11-01	J Environ Manage	298		113537	34426214	10.1016/j.jenvman.2021.113537		#382	Armoskaite 2021	Exclusion reason: No comparator - No control or implemented intervention;
The impact of resource collection by local communities on the dry forests of the Kalakad-Mundanthurai Tiger Reserve	Arjunan, M.; Puyravaud, J. P.; Davidar, P.	Rural communities often depend on forest resources for their livelihood, but non-sustainable extraction of these resources can result in the loss of biodiversity. To assess the impact of resource extraction on forest vegetation, we conducted a study in the dry deciduous forests adjoining the eastern boundary of the Kalakad-Mundanthurai Tiger Reserve in the southern western ghats, India. Using 8, …				46						#383		Exclusion reason: Biodiversity metric only;
Management effectiveness of a large marine protected area in Northeastern Brazil	AraÃºjo, J. L.; Bernard, E.	Brazil has one of the largest protected areas (PA) systems in the world but just a small fraction is devoted to the protection of marine habitats. The effectiveness and integrity of PA are being challenged and questioned worldwide and this situation is not different in Brazil. Poorly managed PA are more vulnerable to habitat loss, poaching and other threats. Alarmingly, studies have shown that ju…				130						#384		Exclusion reason: Does not meet inclusion criteria ;	I
Corrigendum: Global demand for gold is another threat for tropical forests (2014_x000D_ Environ. Res. Lett._x000D_ 10_x000D_ 014006)	Alvarez-BerrÃ­os, Nora L.; Mitchell Aide, T.	The current global gold rush, driven by increasing consumption in developing countries and uncertainty in financial markets, is an increasing threat for tropical ecosystems. Gold mining causes significant alteration to the environment, yet mining is often overlooked in deforestation analyses because it occupies relatively small areas. As a result, we lack a comprehensive assessment of the spatial…	2015		Environmental Research Letters	10	2			10.1088/1748-9326/10/2/029501		#386	Alvarez-BerrÃ­os 2015	Exclusion reason: Missing comparator;
The underwater acoustic environment at SGaan Kinghlas-Bowie Seamount Marine Protected Area: Characterizing vessel traffic and associated noise using satellite AIS and acoustic datasets	Allen, A. S.; Yurk, H.; Vagle, S.; Pilkington, J.; Canessa, R.	Vessel traffic is one of the most wide-spread anthropogenic contributors to ocean noise worldwide and has the potential to alter ecosystems upon which cetaceans and other acoustically sensitive marine organisms rely. Canada's SGaan Kinghlas-Bowie Seamount Marine Protected Area (SK-B MPA) is one such area whose productive ecosystem could benefit from greater monitoring of human induced threats in …	2018	Mar	Mar Pollut Bull	128		82-88	29571416	10.1016/j.marpolbul.2018.01.014		#388	Allen 2018	Exclusion reason: Limitations in outcome measurement;
Negative impact of rural settlements on natural resources in the protected areas: Kovada Lake National Park, Turkey	Alkan, H.	In this study negative human impacts on natural resource values of Kovada lake National park (KLNP) have been discussed in accordance with actual data and evaluations obtained from field surveys. The method used in this study is based on questionnaire, interviews and direct observations conducted in rural settlements within the boundary of the national park. According to the results of this study…	2009	May	J Environ Biol	30	3	363-72	20120460			#389	Alkan 2009	Exclusion reason: No comparator - No control or implemented intervention;
Assessing the Management Effectiveness of Three Protected Areas in Ghana	Afriyie, J. O.; Asare, M. O.; Danquah, E.; Pavla, H.	Assessments of management effectiveness of protected areas offer vital information about threats and management issues at the protected area. However, these assessments are frequently conducted mainly at the internal management level, without input from the local communities that implicitly influence the resources of the protected areas. The aim of this study was to assess the effectiveness of th…	2021	Jan-Mar	CONSERVATION & SOCIETY	19	1	13-24	WOS:000621017300003	10.4103/cs.cs_20_28		#390	Afriyie 2021	Exclusion reason: No comparator - No control or implemented intervention;
Assessment of Threats to Vegetation Cover in Wadi El Rayan Protected Area, Western Desert, Egypt	Afefe, A. A.; Hatab, E. E.; Abbas, M. S.; Gaber, E. I.	Wadi El Rayan is located in the African Sahara ecoregion of the Palearctic eco-zone, the world's largest hot desert. The total area of Wadi El Rayan is 1759km(2). The objective of the present study is to enrich the knowledge on the vegetation cover along the shores of Wadi El Rayan lakes and to identify the different threats, underlying causes and recommended solutions for the conservation of nat…	2016	Sep	International Journal of Conservation Science	7	3	691-708	WOS:000387670600009			#391	Afefe 2016	Exclusion reason: Missing comparator;
Evaluating the Mitigation Measures to Biodiversity Threats in Cross River National Park, Nigeria	Adetola, B. O.; Ofuya, E. E.	The extent to which the mitigation strategies in Cross River National Park (CRNP) Nigeria were able to curb anthropogenic activities was evaluated. Being one of Africa's oldest rainforests and biodiversity hotspot, various illegal activities are rampant in the two divisions of the park that without conservation measures, the forest resources would get to the state of being obliterated. Data were …	2021	Jan-Mar	International Journal of Conservation Science	12	1	237-246	WOS:000625324400017			#392	Adetola 2021	Exclusion reason: Limitations in outcome measurement;
Human-induced land degradation dominance in the Nigerian Guinea Savannah between 2003 - 2018	Adenle, A. A.; Eckert, S.; Adedeji, O. I.; Ellison, D.; Speranza, C. I.	Land degradation poses a persistent challenge to ecosystems and sustainable livelihoods in the Nigerian Guinea Savannah (NGS). While both human activity and climate variability have been implicated as degradation drivers, the lack of research fuels dispute over the causes and status of land degradation in the Savannah. Detailed evidence on the contributions of both rainfall and human activities c…	2020	Aug	REMOTE SENSING APPLICATIONS-SOCIETY AND ENVIRONMENT	19			WOS:000654342800033	ARTN 100360_x000D_10.1016/j.rsase.2020.100360		#393	Adenle 2020	Exclusion reason: Missing comparator;
Through the Boundaries: Environmental Factors Affecting Reef Benthic Cover in Marine Protected Areas in the Philippines	Panga, F. M.; Anticamara, J. A.; Quibilan, M. C. C.; Atrigenio, M. P.; AliÃ±o, P. M.	Philippine coral reefs have been on the decline since the 1970s, and this degradation has posed a risk to biodiversity, food security, and livelihood in the country. In an effort to arrest this degradation, marine protected areas (MPAs) were established across the country. MPAs are known to improve fish biomass, but their effect on live coral cover and other benthos is not yet well documented and…	2021	2018-08-01	FRONTIERS IN MARINE SCIENCE	8			WOS:000692700800001	ARTN 702071_x000D_10.3389/fmars.2021.702071		#21	Panga 2021		Does not meet inclusion criteria
Deforestation in protect areas in the Amazon: a threat to biodiversity	Paiva, Paula Fernanda Pinheiro Ribeiro; de Lourdes Pinheiro Ruivo, Maria; da Silva JÃºnior, Orleno Marques; de NazarÃ© Martins Maciel, Maria; Braga, Thais Gleice Martins; de Andrade, Milena MarÃ­lia Nogueira; dos Santos Junior, Paulo Cerqueira; da Rocha, Eduardo Saraiva; de Freitas, Tatiana ParÃ¡ Monteiro; da Silva Leite, Tabilla Verena; Gama, Luana Helena Oliveira Monteiro; de Sousa Santos, Leon…	The creation of protected areas (Protected Areas-CA and Indigenous Lands-IL) is one of the effective strategies to contain deforestation, and landscape fragmentation and conserve biodiversity. However, several such areas in the Amazon suffer from anthropogenic pressures which prevent the fulfilment of their purpose. The objective of this study is to analyze the use and vegetation cover in four pr…	2019	Jan	Biodiversity and Conservation	29	1	19-38	WOS:000491191400002	10.1007/s10531-019-01867-9		#22	Paiva 2019		I; Missing comparator: No control / implemented intervention
Assessing Local and Surrounding Threats to the Protected Area Network in a Biodiversity Hotspot: The Hengduan Mountains of Southwest China	Ye, X.; Liu, G.; Li, Z.; Wang, H.; Zeng, Y.	Protected areas (PAs) not only serve as refuges of biodiversity conservation but are also part of large ecosystems and are vulnerable to change caused by human activity from surrounding lands, especially in biodiversity hotspots. Assessing threats to PAs and surrounding areas is therefore a critical step in effective conservation planning. We apply a threat framework as a means of quantitatively …	2015		PLoS One	10	9	e0138533	26382763	10.1371/journal.pone.0138533		#25	Ye 2015		Does not meet inclusion criteria
Analyzing the Land Use and Cover Change Inside and Outside China's Ecological Function Area	Wang, Y. J.; Rao, Y. H.; Zhu, H. B.	The establishment of nature reserves and ecological function areas is crucial for preserving the natural environment and the invaluable services provided by ecosystems. In our study, we conducted a comprehensive analysis using the 2011-2020 Chinese land cover dataset to examine the impact of ecological function areas on regional land use and cover change. This analysis allowed us to quantify and …	2023	Jul	LAND	12	7		WOS:001036225000001	ARTN 1447_x000D_10.3390/land12071447		#28	Wang 2023	Jonas Geldmann (2024-08-23 20:44:40)(Select): not really sure what Ecological Function Area is but probably should be checked at full text to see if hhtis is a type of protection ;	High bias - Should be discarted; Missing comparator
Threat reduction assessment of conventional and community-based conservation approaches to managing protected areas in Uganda	Mugisha, A. R.; Jacobson, S. K.	Loss of wildlife, encroachment on wild lands and conflicts between protected areas and neighbouring communities continue to threaten the integrity of protected areas (PAs) in Uganda. To increase support from local communities and ensure long-term sustainability for Uganda's PAs, a policy of community-based conservation was introduced in 1988 as a management approach in seven PAs. The effectivenes…	2004	Sep	ENVIRONMENTAL CONSERVATION	31	3	233-241	WOS:000226971200010	10.1017/S0376892904001432		#35	Mugisha 2004		I
Geomorphology and hydrochemistry of 12 Alpine lakes in the Gran Paradiso National Park, Italy	Tiberti, R.; Tartari, G. A.; Marchetto, A.	Twelve Alpine lakes located in the Gran Paradiso National Park, in the western Italian Alps, were sampled during the ice free period in 2008 and analysed for the main morphological, chemical and physical variables in relation to the characteristics of their watershed, with the aim to create a reference database for present and future ecological studies and to support conservation politics with sc…	2010		Journal of Limnology	69	2	242-256	WOS:000282859700007	10.4081/jlimnol.2010.242		#56	Tiberti 2010		Does not meet inclusion criteria; Maybe
Response of lake water nutrient condition to anthropogenic activities from 1871 to 2013 in the Jiuzhaigou World Natural Heritage Site, China	Zheng, X. L.; Du, J.; Schmidt, A. H.; Qiao, X.; Power, A.; Grosvenor, M. J.; Tang, Y.	Over the past century, lake degradation has increased around the world. Jiuzhaigou World Natural Heritage Site in southwestern China has been experiencing water nutrient enrichment, accelerated swamping, and algal biomass increases. These problems are likely associated with enhanced local anthropogenic activities over the past decades. In this study, radioactivities of Cs-137 and Pb-210, diatoms,…	2022	Dec	JOURNAL OF PALEOLIMNOLOGY	68	4	345-360	WOS:000844902700001	10.1007/s10933-022-00248-7		#84	Zheng 2022		I; Missing comparator: No control / implemented intervention
Deforestation and fragmentation trends of seasonal dry tropical forest in Ecuador: impact on conservation	Rivas, C. A.; Guerrero-Casado, J.; Navarro-Cerillo, R. M.	Background Fragmentation and deforestation are one of the greatest threats to forests, and these processes are of even more concern in the tropics, where the seasonal dry forest is possibly one of the most threatened ecosystems with the least remaining surface area. Methods The deforestation and fragmentation patterns that had occurred in Ecuadorian seasonal dry forests between 1990 and 2018 were…	2021	2011-07-01	Forest Ecosystems	8	1		WOS:000671632400001	ARTN 46_x000D_10.1186/s40663-021-00329-5		#123	Rivas 2021		I; Missing comparator: No control / implemented intervention
Land-cover change within and around protected areas in a biodiversity hotspot	Bailey, K. M.; McCleery, R. A.; Binford, M. W.; Zweig, C.	The landscape surrounding protected areas influences their ability to maintain ecosystem functions and achieve conservation goals. As anthropogenic intensification continues, it is important to monitor land-use and land-cover change in and around protected areas. We measure land-cover change surrounding protected areas in the Maputaland-Pondoland-Albany Biodiversity hotspot from the 1980s to pres…	2016		JOURNAL OF LAND USE SCIENCE	11	2	154-176	WOS:000404054800002	10.1080/1747423x.2015.1086905		#138	Bailey 2016		I; Maybe
Decadal dynamics and challenges for seagrass beds management in Cu Lao Cham Marine Protected Area, Central Vietnam	Tin, Hoang C.; Uyen, Nguyen T.; Hieu, Duong V.; Ni, Tran N. K.; Tu, Nguyen H. C.; Saizen, Izuru	Seagrass beds in central Vietnam plays an important role in the aquatic ecosystem. The area of seagrass beds in Cu Lao Cham Marine Protected Area (MPA), central Vietnam, has been reported to be declining in recent years. However, there has not been any study on assessing the changes in the area of seagrass beds in Cu Lao Cham MPA, especially by the application of remote sensing technology for eva…	2019	Dec	Environment, Development and Sustainability	22	8	7639-7660	WOS:000499972800001	10.1007/s10668-019-00540-z		#164	Tin 2019		I; Missing comparator: No control / implemented intervention
Protection from harvesting restores the natural social structure of eastern wolf packs	Rutledge, L. Y.; Patterson, B. R.; Mills, K. J.; Loveless, K. M.; Murray, D. L.; White, B. N.	Legal and illegal killing of animals near park borders can significantly increase the threat of extirpation for populations living within ecological reserves, especially for wide-ranging large carnivores that regularly travel into unprotected areas. While the consequences of human-caused mortality near protected areas generally focus on numerical responses, little attention has been given to impa…	2010	Feb	BIOLOGICAL CONSERVATION	143	2	332-339	WOS:000274761000007	10.1016/j.biocon.2009.10.017		#241	Rutledge 2010		Does not meet inclusion criteria; Maybe
Protected area effectiveness against land development in Spain	Rodriguez-Rodriguez, D.; Martinez-Vega, J.	Land use-land cover (LULC) changes towards artificial covers are one of the main global threats to biodiversity conservation. In this comprehensive study, we tested a number of methodological and research hypotheses, and a new covariate control technique in order to address common protected area (PA) assessment issues and accurately assess whether different PA networks have had an effect at preve…	2018	2001-06-01	J Environ Manage	215		345-357	29579727	10.1016/j.jenvman.2018.03.011		#246	Rodriguez-Rodriguez 2018		Awaiting classification; Maybe
Land Cover Change in Cabayugan, Puerto Princesa Subterranean River National Park, Palawan, Philippines	Palao, L. K. M.; Dressler, W. H.; Cruz, R. V. O.; Pulhin, J. M.; Bantayan, N. C.; Florece, L. M.	This paper examines the land use and land cover change in Puerto Princesa Subterranean River National Park, Cabayugan in Palawan. With the overlap of various environmental policies, managers have divided much of Palawan's landscape into different management zones affecting the land use systems of the local people, especially swidden agriculture (kaingin) which is considered threat to forest conse…	2010		JOURNAL OF ENVIRONMENTAL SCIENCE AND MANAGEMENT	13	2	2013-01-01	WOS:000289226600001	NA		#253	Palao 2010		I; Missing comparator: No control / implemented intervention
The status of anthropogenic threat at the people-park interface of Bwindi Impenetrable National Park, Uganda	Olupot, W.; Barigyira, R.; Chapman, C. A.	Effective management of anthropogenic threats is key to sustaining biological diversity in protected areas. Types and distribution of threats to Bwindi Impenetrable National Park, Uganda were investigated to assess the Park's status 12 years after it was upgraded from a forest reserve to a national park. Bwindi, like many tropical forested parks, is surrounded by dense human populations. Threats …	2009	Mar	ENVIRONMENTAL CONSERVATION	36	1	41-50	WOS:000267236700008	10.1017/S0376892909005347		#256	Olupot 2009		I; Missing comparator: No control / implemented intervention
Assessment of Wildlife Law Enforcement Practices in Cross River National Park, Nigeria	Nchor, A. A.; Assam, A.; Nnadi, P. C.	The study examined the level of wildlife law enforcement practices in Cross River National Park Nigeria. 172 questionnaires were administered to eight purposively selected local communities living close to the park known as Support Zone Communities (SZC) and 24 questionnaires to field staff in the park. Focus Group Discussion was also conducted involving communityâ€™s leaders and key management s…				12						#259			I; Missing comparator: No control / implemented intervention
Does protection of marine areas safeguard coral reefs from human-source pollution?	Kaimba, A.; de Villiers, S.; Wambua, S.	Marine biodiversity is under increasing threat as the area covered by corals diminishes under pressure from climate change and human activities, most of which lead to marine pollution. In Kenya, marine protected areas (MPAs) are the key strategy used to protect coral reefs and biodiversity. However, MPAs' effectiveness to prevent pollution of the reefs has not been specifically assessed. We deter…				7						#308			High bias - Should be discarted

## Sheet: Excluded grey literature
ID	Organization	Website	Search method	Key words used	Additional search strategy	Date of search	Reference	Included?	Reasons	Source to file
1	Wildlife Conservation Society (WCS)	https://library.wcs.org/en-us/Scientific-Research/Publications-Bibliographies.aspx	Search in website	protected areas	NA	25 Februrary 2025	Njana, M. A. (2025). "Ecological significance of protected areas in the tropical mountains of Eastern Africa." Ecological Indicators 170, e113010. https://doi.org/10.1016/j.ecolind.2024.113010	Excluded	Doesn’t meet inclusion criteria
2	Wildlife Conservation Society (WCS)	https://library.wcs.org/en-us/Scientific-Research/Publications-Bibliographies.aspx	Search in website	protected areas	NA	25 Februrary 2025	González-Maya, J. F., C. H. Cáceres-Martínez, A. Acevedo Rincón and I. Mauricio Vela-Vargas (2025). "A true highlander hermit: Human density and distance to natural cover negatively affect habitat selection by Andean bear." Journal for Nature Conservation 84, e126833. https://doi.org/10.1016/j.jnc.2025.126833	Excluded	Doesn’t meet inclusion criteria
3	Wildlife Conservation Society (WCS)	https://library.wcs.org/en-us/Scientific-Research/Publications-Bibliographies.aspx	Search in website	protected areas	NA	25 Februrary 2025	Zhu, Y., J. A. Britnell, J. Shi, B. Buuveibaatar and S. Shultz (2025). "Anthropogenic pressures lead to different patterns of niche contraction and protected area cover in three species Procapra gazelles on Qinghai-Tibet Plateau and Mongolia." Diversity and Distributions 31(1), e13949. https://doi.org/10.1111/ddi.13949	Excluded	Doesn’t meet inclusion criteria
4	Wildlife Conservation Society (WCS)	https://library.wcs.org/en-us/Scientific-Research/Publications-Bibliographies.aspx	Search in website	protected areas	NA	25 Februrary 2025	Ingram, D. J., G. Z. L. Froese, D. Carroll, P. C. Bürkner, F. Maisels, ..., H. G. Ekodeck, C. A. Emogor, ..., G. D. Ngohouani, F. Sandrin, ..., L. Vanegas et al. (In Press). "Regional patterns of wild animal hunting in African tropical forests." Nature Sustainability. https://doi.org/10.1038/s41893-024-01494-5	Excluded	Doesn’t meet inclusion criteria
5	Wildlife Conservation Society (WCS)	https://library.wcs.org/en-us/Scientific-Research/Publications-Bibliographies.aspx	Search in website	protected areas	NA	25 Februrary 2025	Mast, A., D. Gill, G. N. Ahmadia, E. S. Darling et al. (2025). "Shared governance increases marine protected area effectiveness." PLoS ONE 20(1), e0315896. https://doi.org/10.1371/journal.pone.0315896	Excluded	Doesn’t meet inclusion criteria
6	Wildlife Conservation Society (WCS)	https://library.wcs.org/en-us/Scientific-Research/Publications-Bibliographies.aspx	Search in website	protected areas	NA	25 Februrary 2025	McClanahan, T. R., Marnane, M. J., Cinner, J. E., & Kiene, W. E. (2006). A comparison of marine protected areas and alternative approaches to coral-reef management. Current biology, 16(14), 1408-1413.	Excluded	Doesn’t meet inclusion criteria
7	Wildlife Conservation Society (WCS)	https://library.wcs.org/en-us/Scientific-Research/Publications-Bibliographies.aspx	Search in website	protected areas	NA	25 Februrary 2025	Gill, D. A., Lester, S. E., Free, C. M., Pfaff, A., Iversen, E., Reich, B. J., ... & Warmuth, L. M. (2024). A diverse portfolio of marine protected areas can better advance global conservation and equity. Proceedings of the National Academy of Sciences, 121(10), e2313205121.	Excluded	Doesn’t meet inclusion criteria
8	Wildlife Conservation Society (WCS)	https://library.wcs.org/en-us/Scientific-Research/Publications-Bibliographies.aspx	Search in website	protected areas	NA	25 Februrary 2025	Mascia, M. B., Fox, H. E., Glew, L., Ahmadia, G. N., Agrawal, A., Barnes, M., ... & White, A. T. (2017). A novel framework for analyzing conservation impacts: evaluation, theory, and marine protected areas. Annals of the New York Academy of Sciences, 1399(1), 93-115.	Excluded	Doesn’t meet inclusion criteria
9	Wildlife Conservation Society (WCS)	https://library.wcs.org/en-us/Scientific-Research/Publications-Bibliographies.aspx	Search in website	protected areas	NA	25 Februrary 2025	Nampindo, S., & Plumptre, A. (2005). A socio-economic assessment of community livelihoods in areas adjacent to corridors linking Queen Elizabeth National Park to other protected areas in Western Uganda. Wildlife Conservation Society, Albertine Rift Programme.	Excluded	Excluded at full screening. No intervetion assessed	https://d1wqtxts1xzle7.cloudfront.net/35632399/QENP_Linkages_Report-libre.pdf?1416360597=&response-content-disposition=inline%3B+filename%3DA_SOCIOECONOMIC_ASSESSMENT_OF_COMMUNITY.pdf&Expires=1740500034&Signature=ZCXfqvpcAsqNluKnhMsQUKziOWnLkOy2OKQfAeudykKVFvuKvvdqDScG9XQaV5g-Csb2-TkJgIgQCEZEzn6w08eOfBNyrByRDJ0L9LYVk-wco1XwP2tckeLmd6aA-aDrrN9fnaBkajqSmgmM0Bs1wTMXSzFdHi62XqbfRqv5Je-1YlIGc~Iqc3DNEy…
10	Wildlife Conservation Society (WCS)	https://library.wcs.org/en-us/Scientific-Research/Publications-Bibliographies.aspx	Search in website	protected areas	NA	25 Februrary 2025	Ray, J. and D. Reid. 2007. Aboriginal peoples and protected areas in Canada: Implications for achieving conservation. Pgs 60-64 in K.H.Redford and E. Fearn (eds.). Protected Areas and Human Displacement: a conservation perspective. Working Paper No. 29, Wildlife Conservation Society, New York.	Excluded	Doesn’t meet inclusion criteria
11	International Union for Nature Conservation (IUCN)	https://iucn.org/resources#resources	Search in website	protected areas	Effective protected areas - Grey literature	26 February 2025	TWENTY&TWO STORIES(( OF CONSERVATION IN(AFRICA: KEY ELEMENTS FOR EFFECTIVE AND(( WELL&GOVERNED PROTECTED AREAS(( IN(SUB&SAHARAN(AFRICA; The! IUCN! Programme! for! African! Protected!Areas!&!Conservation!	Excluded	Excluded at full screening. No intervetion assessed	https://portals.iucn.org/library/sites/library/files/documents/Rep-2015-001.pdf
12	International Union for Nature Conservation (IUCN)	https://iucn.org/resources#resources	Search in website	protected areas	Effective protected areas - Grey literature	26 February 2025	A global overview of forest protected areas on the World Heritage list. Authors: Sigaty, Todd, Thorsell, J. W., Year: 1997	Excluded	Excluded at full screening. No intervetion assessed	https://portals.iucn.org/library/sites/library/files/documents/WH-WP-003.pdf
13	International Union for Nature Conservation (IUCN)	https://iucn.org/resources#resources	Search in website	protected areas	Effective protected areas - Grey literature	26 February 2025	Assessing benefits to the economy from protected areas : a summary for decision-makers. 1996	Excluded	Excluded at full screening. No intervetion assessed	https://portals.iucn.org/library/sites/library/files/documents/1996-061-add1.pdf
14	International Union for Nature Conservation (IUCN)	https://iucn.org/resources#resources	Search in website	protected areas	Effective protected areas - Grey literature	26 February 2025	The conservation atlas of tropical forests : the Americas	Excluded	Doesn’t meet inclusion criteria
15	International Union for Nature Conservation (IUCN)	https://iucn.org/resources#resources	Search in website	protected areas	Effective protected areas	26 February 2025	Communal Lands and Protected Areas in Peru	Excluded	Doesn’t meet inclusion criteria	https://iucn.org/sites/default/files/2022-06/tger_peru_final-english.pdf
16	International Union for Nature Conservation (IUCN)	https://iucn.org/resources#resources	Search in website	protected areas	Effective protected areas	26 February 2025	Dawson, N. M., Coolsaet, B., Sterling, E. J., Loveridge, R., Gross-Camp, N. D., Wongbusarakum, S., ... & Rosado-May, F. J. (2021). The role of Indigenous peoples and local communities in effective and equitable conservation. Ecology and Society, 26(3), 19.	Excluded	Doesn’t meet inclusion criteria	https://portals.iucn.org/library/node/7921
17	International Union for Nature Conservation (IUCN)	https://iucn.org/resources#resources	Search in website	protected areas	Effective protected areas	26 February 2025	The World Commission on Protected Areas 2nd Southeast Asia Regional Forum, Pakse, Lao PDR, vol.1 : executive summary, vol.2 : papers presented. 2000	Excluded	Doesn’t meet inclusion criteria	https://portals.iucn.org/library/sites/library/files/documents/2000-104-En.pdf
18	International Union for Nature Conservation (IUCN)	https://portals.iucn.org/library/search/node/protected%20areas%20threats	Search in website	protected areas threats		26 February 2025	Threats to forest protected areas : summary of a survey of 10 countries carried out in association with the World Commission on Protected Areas. 1999. IUCN	Excluded	Doesn’t meet inclusion criteria	https://portals.iucn.org/library/sites/library/files/documents/Rep-1999-052-En-Summ.pdf
19	World Wide Fund for Nature (WWF)	https://portals.iucn.org/library/search/node/protected%20areas%20threats	Search in website	protected areas threats		26 February 2025	Threats to protected areas : squandering paradise? The importance and vulnerability of the world's protected areas. 2000	Excluded	Doesn’t meet inclusion criteria	https://wwfeu.awsassets.panda.org/downloads/squandering_paradise.pdf
20	International Union for Nature Conservation (IUCN)	https://portals.iucn.org/library/search/node/protected%20areas%20threats	Search in website	protected areas threats		26 February 2025	Parks and reserves of Ghana : management effectiveness assessment of protected areas	Excluded	Doesn’t meet inclusion criteria	https://portals.iucn.org/library/node/9763
21	International Union for Nature Conservation (IUCN)	https://portals.iucn.org/library/search/node/protected%20areas%20threats	Search in website	protected areas threats		26 February 2025	Mobilizing to defeat threats to protected areas	Excluded	No access	https://portals.iucn.org/library/node/23090
22	UNEP-WCMC	https://portals.iucn.org/library/search/node/protected%20areas%20threats	Search in website	protected areas threats		26 February 2025	The world's protected areas : status, values and prospects in the 21st century. 2008	Excluded	Doesn’t meet inclusion criteria	https://portals.iucn.org/library/node/9309
23	Global Environmental Facility (GEF)	https://www.thegef.org/newsroom/publications	Search in website	Biodiversity	Protected areas	26 February 2025	How Conservation Trust Funds Are Driving Progress for Nature	Excluded	Doesn’t meet inclusion criteria
24	Global Environmental Facility (GEF)	https://www.thegef.org/newsroom/publications	Snowballing from report		Protected areas	26 February 2025	Effectiveness of Parks in Protecting Tropical Biodiversity	Excluded	Excluded at full screening. No intervetion assessed	https://www.science.org/doi/epdf/10.1126/science.291.5501.125
25	Global Environmental Facility (GEF)	https://www.thegef.org/newsroom/publications	Snowballing from report		Protected areas	26 February 2025	IMPACT EVALUATION OF GEF SUPPORT TO PROTECTED AREAS AND PROTECTED AREA SYSTEMS, 2015	Excluded	Excluded at full screening. No intervetion assessed	Consistent with results of the METT analysis (see previous section), improved law enforcement was reported in 13 of the 17 GEF-supported PAs that were visited; 10 reported a reduction in at least one activity destructive to biodiversity, such as poaching or illegal logging. In 9 of these, compliance with PA regulations was said to also have improved. Positive changes were found in areas that expe…
26	World Wide Fund for Nature (WWF)	https://wwf.panda.org/discover/knowledge_hub/all_publications/	Search in website	Protected areas		26 February 2025	REPORT: Marine Protected Areas: Smart Investments in Ocean Health	Excluded	Excluded at full screening. Doesn’t meet inclusion criteria
27	World Wide Fund for Nature (WWF)	https://wwf.panda.org/discover/knowledge_hub/all_publications/	Search in website	Protected areas		26 February 2025	Maretti, C.C., Riveros S.,J.C., Hofstede, R., Oliveira, D., Charity, S., Granizo, T., Alvarez, C., Valdujo, P. & C. Thompson. 2014. State of the Amazon: Ecological Representation in Protected Areas and Indigenous Territories. Brasília and Quito: WWF Living Amazon (Global) Initiative. 82pp.	Excluded	Excluded at full screening. Doesn’t meet inclusion criteria	https://wwfint.awsassets.panda.org/downloads/final_report_11_11_14.pdf
28	World Wide Fund for Nature (WWF)	https://wwf.panda.org/discover/knowledge_hub/all_publications/	Search in website	Protected areas		26 February 2025	PROTECTED AREAS AND BEYOND. 2012. WWF Global Arctic Programme	Excluded	Excluded at full screening. Doesn’t meet inclusion criteria	https://awsassets.panda.org/downloads/circle0312_web.pdf
29	World Wide Fund for Nature (WWF)	https://wwf.panda.org/discover/knowledge_hub/all_publications/	Search in website	Protected areas		26 February 2025	last of the wild - OVERVIEW OF THE STATUS AND MONITORING OF SOME WILDERNESS RELATED SPECIES IN THE NATURA 2000 NETWORK	Excluded	Excluded at full screening. Doesn’t meet inclusion criteria	https://wwf.panda.org/discover/knowledge_hub/all_publications/?192725/Last-of-the-wild---New-publication-on-wilderness-species
30	World Wide Fund for Nature (WWF)	https://wwf.panda.org/discover/knowledge_hub/all_publications/	Search in website	Protected areas		26 February 2025	Tracking progress in managing protected areas around the world. 2007	Excluded	Excluded at full screening. Doesn’t meet inclusion criteria	https://wwfint.awsassets.panda.org/downloads/mett_report__june_2007_final.pdf
31	World Wide Fund for Nature (WWF)	https://wwf.panda.org/discover/knowledge_hub/all_publications/	Search in website	Protected areas		26 February 2025	Joining the Dots - Species and Protected Areas	Excluded	Excluded at full screening. Doesn’t meet inclusion criteria	https://wwfint.awsassets.panda.org/downloads/joiningthedotsspeciesandpascbdcop8officeuse.pdf
32	World Wide Fund for Nature (WWF)	https://wwf.panda.org/discover/knowledge_hub/all_publications/	Search in website	Protected areas		26 February 2025	Management Effectiveness Assessment of the Mongolian Protected Areas System using WWF’S RAPPAM Methodology	Excluded	Excluded at full screening. Doesn’t meet inclusion criteria	https://wwfint.awsassets.panda.org/downloads/rappammongolia2005.pdf
33	World Wide Fund for Nature (WWF)	https://wwf.panda.org/discover/knowledge_hub/all_publications/	Search in website	Protected areas		26 February 2025	Reporting Progress at Protected Area Sites.2005	Excluded	Doesn’t meet inclusion criteria
34	World Wide Fund for Nature (WWF)	https://wwf.panda.org/discover/knowledge_hub/all_publications/	Search in website	Protected areas		26 February 2025	Creation of a Marine Protected Area network in Senegal.2005	Excluded	Doesn’t meet inclusion criteria	https://wwf.panda.org/discover/knowledge_hub/all_publications/?21904/Creation-of-a-Marine-Protected-Area-network-in-Senegal
35	World Wide Fund for Nature (WWF)	https://wwf.panda.org/discover/knowledge_hub/all_publications/	Search in website	Protected areas		26 February 2025	How effective are protected areas? A preliminary analysis of forest protected areas by WWF – the largest ever global assessment of protected area management effectiveness. 2004	Excluded	Excluded at full screening. Doesn’t meet inclusion criteria	https://wwfint.awsassets.panda.org/downloads/protectedareamanagementreport.pdf
36	Conservation International	https://www.conservation.org/2024-impact-report	Search in website	Protected areas		26 February 2025	Impact report 2024	Excluded	Excluded at full screening. Doesn’t meet inclusion criteria	https://d2iwpl8k086uu2.cloudfront.net/docs/default-source/s3-library/publication-pdfs/conservation-international-impact-report-2024.pdf?sfvrsn=73c164cf_3
37	Conservation International	https://portals.iucn.org/library/taxonomy/term/30155	Search in website	Protected areas		26 February 2025	Securing protected areas in the face of global change : options and guidelines. Call for comment and input	Excluded	No access
38	Conservation International	https://portals.iucn.org/library/taxonomy/term/30156	Search in website	Protected areas		26 February 2025	The Central American system of protected areas : more than three decades of conceptualization and management challenges. 2003	Excluded	No access
39	BirdLife International	https://datazone.birdlife.org/publications	Search in website	Protected areas		26 February 2025	NA	NA	NA

## Sheet: Sheet1
Exclusion reason:	Frequency
Limitations in outcome measurement;	23
Biodiversity metric only	40
Missing intervention: No PAs involved	20
No comparator: No control or implemented intervention	83
Does not meet inclusion criteria	126	14 from grey literature
High risk of bias	6
Article not found	3
Total	301
