# Supplementary material for: A systematic review of the effectiveness of protected areas at reducing threats to biodiversity
Source: Research Square preprint supplement (doi:10.21203/rs.3.rs-7046705/v1), 2025-07-11
Supplement: Supplementary file 2 [file 8eddb88af806b9ad2a421f36.xlsx]

## Sheet: 1. Selected papers
Title	Authors	Year	DOI
Management impacts on fire occurrence: A comparison of fire regimes of African and South American tropical savannas in different PAs	Swanni Alvarado, Thiago Silva, Sally Archibald	2018	https://doi.org/10.1016/j.jenvman.2018.04.004
Using nighttime lights to assess infrastructure expansion within and around PAs in South America	MarÌ?a JosÌ© Andrade-NÌ¼Ì±ez and T Mitchell Aide	2020	https://doi.org/10.1088/2515-7620/ab716c
Differential vulnerability to biological invasions: not all PAs (and not all invaders) are the same	Daniel AyllÌ?n, RocÌ?o A. Baquero, Graciela G. Nicola	2022	https://doi.org/10.1007/s10531-022-02407-8
Road-effect mitigation promotes connectivity and reduces mortality at the population-level	Sean P. Boyle et al	2021	https://doi.org/10.1016/j.biocon.2021.109230
Impacts of conservation incentives in PAs: The case of Bolsa Floresta, Brazil	ElÌ?as Cisneros et al	2022	https://doi.org/10.1016/j.jeem.2021.102572
Urban sprawl into Natura 2000 network over Europe	Elena D. ConcepciÌ?n	2020	DOI: 10.1111/cobi.13687
Human-climate interactions shape fire regimes in the Cerrado of SÌ£o Paulo state, Brazil	Dhemerson E. Conciani, Lucas Pereira dos Santos, Thiago Sanna Freire Silva, Giselda Durigan, Swanni T. Alvarado,	2021	https://doi.org/10.1016/j.jnc.2021.126006.
How does the fire regime change after creating a PA in the Brazilian Cerrado?	Izadora S. de Carvalho et al.	2023	https://doi.org/10.1016/j.jnc.2022.126318
Assessment of National Parks affected by naturbanization processes in Southern Europe	M. Calvache, et al.	2016	http://dx.doi.org/10.1080/09640568.2015.1083416
Compound impact of land use and extreme climate on the 2020 fire record of the Brazilian Pantanal	Maria Lucia Ferreira Barbosa et al	2022	DOI: 10.1111/geb.13563
An integrative analysis of threats affecting PAs in a biodiversity stronghold in Southeast Mexico	O. GodÌ?nez-Gomez, et al	2019	https://doi.org/10.1016/j.gecco.2020.e01297
Influence of settings management and protection status on recreational uses and pressures in marine PAs	G. Charles, et al	2017	http://dx.doi.org/10.1016/j.jenvman.2017.05.051
Deforestation in an African biodiversity hotspot: Extent, variation and the effectiveness of PAs	Jonathan M.H. Green et al	2013	https://doi.org/10.1016/j.biocon.2013.04.016
Is the Natura 2000 network effective to prevent the biological invasions?	Carlos Guerra et al	2018	https://doi.org/10.1016/j.gecco.2018.e00497
Worldwide increase in Artificial Light At Night around PAs and within biodiversity hotspots	A. GuettÌ© et al	2018	https://doi.org/10.1016/j.biocon.2018.04.018
Evolving protected-area impacts in Panama: impact shifts show that plans require anticipation	Akiko Haruna et al	2014	doi:10.1088/1748-9326/9/3/035007
Assessing variation in the effectiveness of IUCN PA categorisation. What remotely sensed forest integrity and human modification reveals across the major tropical forest biomes	Samuel Hirons et al.	2022	10.1016/j.ecolind.2022.109337
Continuous growth of human footprint risks compromising the benefits of PAs on the Qinghai-Tibet Plateau	Ting Hua, et al	2022	https://doi.org/10.1016/j.gecco.2022.e02053
Analyzing multi-temporal satellite imagery and stakeholders' perceptions to have an insight into how forest co-management is changing the PA landscapes in Bangladesh	Kazi Nazrul Islam et al	2019	https://doi.org/10.1016/j.forpol.2019.01.011
Business as usual for the human use of Moreton Bay following marine park zoning	R. A. Kenyon et al	2017	https://doi.org/10.1071/MF16400
Ecological indicators for protection impact assessment at two scales in the Bozin and Marakhil PA, Iran	Azad Henareh Khalyani et al	2013	http://dx.doi.org/10.1016/j.ecolind.2012.09.011
Many a little makes a mickle: Cumulative land cover changes and traditional land use in the Kyro reindeer herding district, northern Finland	Sonja Kivinen	2015
Characterizing land disturbance in Atewa Range Forest Reserve and Buffer Zone	John Manyimadin Kusimi	2015	http://dx.doi.org/10.1016/j.landusepol.2015.08.020
Are MPAs effective in removing fishing pressure from benthic species and habitats?	Rebecca Langton et al	2020	https://doi.org/10.1016/j.biocon.2020.108511
Land use and landscape pattern changes on the inside and outside of PAs in urbanizing Selangor state, peninsular Malaysia	Woon Hang Lee	2019
Human pressure dynamics in PAs of China based on nighttime light	Guangyu Li	2020
Human footprint in Tibet: Assessing the spatial layout and effectiveness of nature reserves	Shicheng Li	2018	https://doi.org/10.1016/j.scitotenv.2017.11.216
Effectiveness of functional zones in National Nature Reserves for the protection of forest ecosystems in China	Fangzheng Liu et al	2022	https://doi.org/10.1016/j.jenvman.2022.114593
Landscape change in Southern Ecuador: An indicator-based and multi-temporal evaluation of land use and land cover in a mixed-use PA	Santiago LÌ?pez et al	2020	https://doi.org/10.1016/j.ecolind.2020.106357
A global assessment of the human pressure on the world's lakes	Christos Mammides	2020	10.1016/j.gloenvcha.2020.102084
Recent land cover changes in Spain across biogeographical regions and protection levels: Implications for conservation policies	JesÌ¼s MartÌ?nez-FernÌÁndez et al	2015	10.1016/j.landusepol.2014.11.021
Effectiveness in PAs at resisting development pressures in China	Ziqi Meng et al	2022	https://doi.org/10.1016/j.apgeog.2022.102682
European National Parks protect their surroundings but not everywhere: A study using land use/land cover dynamics derived from CORINE Land Cover data	Mario Mingarro, Jorge M. Lobo	2023	https://doi.org/10.1016/j.landusepol.2022.106434
Terrestrial PAs do not fully shield their streams from exogenous stressors	Victor Hugo dos Santos Mollmann et al	2022	10.1017/S0376892922000261
Are ranger patrols effective in reducing poaching-related threats within PAs?	Jennifer F. Moore et al	2017	DOI: 10.1111/1365-2664.12965
The sources and prevalence of anthropogenic noise in Rockfish Conservation Areas with implications for marine reserve planning	Katrina Nikolich et al	2021	https://doi.org/10.1016/j.marpolbul.2021.112017
Quantifying the effects of deforestation and fragmentation on a range-wide conservation plan for jaguars	Peter J. Olsoy et al.	2016	10.1016/j.biocon.2016.08.037
A twenty year GIS-based assessment of environmental sustainability of land use changes in and around PAs of a fast developing country: Spain	David RodrÌ?guez-RodrÌ?guez et al	2019	https://doi.org/10.1016/j.jag.2018.08.006
Development stressors are stronger than PA management: A case of the Pantanos de Centla Biosphere Reserve, Mexico	Mayra Isabel De la Rosa-VelÌÁzquez et al.	2017	10.1016/j.landusepol.2017.06.009
Protection status and national socio-economic context shape land conversion in and around a key transboundary PA complex in West Africa	Henrike Schulte to Buhne et al	2017	doi: 10.1002/rse2.47
Assessing biological invasions in PAs after 30 years: Revisiting nature reserves targeted by the 1980s SCOPE programme	Ross T. Shackleton et al.	2020	10.1016/j.biocon.2020.108424
What determines the effectiveness of national PA networks?	Payal Shah et al	2021	https://doi.org/10.1088/1748-9326/ac05ed
Spatio-temporal analysis of the human footprint in South Ecuador: Influence of human pressure on ecosystems and effectiveness of PAs	MarÌ?a Fernanda Tapia-Armijos et al	2016	http://dx.doi.org/10.1016/j.apgeog.2016.10.007
Human transformation of ecosystems: Comparing protected and unPAs with natural baselines	David VackÌÁr et al	2016
Spatial-temporal pattern analysis of landscape ecological risk assessment based on land use/land cover change in Baishuijiang National nature reserve in Gansu Province, China	Hong Wang et al	2021	https://doi.org/10.1016/j.ecolind.2021.107454
Changes in habitat quality of nature reserves in depopulating areas due to anthropogenic pressure: Evidence from Northeast China, 2000-2018	Hui Wu et al	2022	https://doi.org/10.1016/j.ecolind.2022.108844
Have China's national forest reserves designated since 1990 conserved forests effectively?	Yu Xu et al	2022	https://doi.org/10.1016/j.jenvman.2022.114485
Sustainability of social-ecological systems under conservation projects: Lessons from a biodiversity hotspot in western China	Kerong Zhang et al.	2013	10.1016/j.biocon.2012.08.021
How good is your marine PA at curbing threats?	Mirta Zupan et al	2018	https://doi.org/10.1016/j.biocon.2018.03.013
Improving PA effectiveness through consideration of different human-pressure baselines	Chun-Ting Feng et al	2021	DOI: 10.1111/cobi.13887
Land Use and Land Cover Dynamics Analysis of the Togodo PA and Its Surroundings in Southeastern Togo, West Africa	Amah AkodÌ©wou et al	2020	doi:10.3390/su12135439
An invasive species erodes the performance of coastal wetland PAs	Junlin Ren et al	2021	DOI: 10.1126/sciadv.abi894
PAs in South Asia have not prevented habitat loss: a study using historical models of land-use change	Natalie E. Clark, Elizabeth H. Boakes, Philip J. K. McGowan, Georgina M. Mace, Richard A. Fuller	2013	doi:10.1371/journal.pone.0065298
Effectiveness of Africa's tropical PAs for maintaining forest cover	J. N. Bowker et al	2016	DOI: 10.1111/cobi.1285
Exploring the relationships between marine PAs and invasive fish in the world's most invaded sea	Sylvaine Giakoumi	2018	https://doi.org/10.1002/eap.1809
Correlates of long-term land-cover change and PA performance at priority conservation sites in Africa	Alison E. Beresford et al	2017	doi:10.1017/S0376892917000157
The last frontiers of wilderness: Tracking loss of intact forest landscapes from 2000 to 2013	Peter Potapov et al.	2017
Mapping change in human pressure globally on land and within PAs	Geldmann, J., et al.	2014	DOI: 10.1111/cobi.12332
Tracking the response of industrial fishing fleets to large marine PAs in the Pacific Ocean	Timothy D. White	2020	DOI: 10.1111/cobi.13584
Size-dependent resistance of PAs to land-use change	Luigi Maiorano et al.	2008	10.1098/rspb.2007.1756
Southeast Asian PAs are effective in conserving forest cover and forest carbon stocks compared to unPAs	Victoria Graham et al	2021	https://doi.org/10.1038/s41598-021-03188-w
Indigenous, colonist, and government Impacts on Nicaragua's Bosawas Reserve	ANTHONY STOCKS et al	2007	DOI: 10.1111/j.1523-1739.2007.00793.x
Landscape Fragmentation in Qinling-Daba Mountains Nature Reserves and Its Influencing Factors	Yingzhuo Zhang et al.	2021	10.3390/land10111124
The Sanjiangyuan Nature Reserve Is Partially Effective in Mitigating Human Pressures	Linyi Tan et al	2022	https://doi.org/10.3390/land11010043
Effectiveness of the Natura 2000 network for freshwater fish conservation in a Mediterranean region	Anna Gavioli et al	2023	DOI 10.3389/fenvs.2023.1122464
Illegal settlement in the Babile Elephant Sanctuary is threatening the resident elephant population	EMILY NEIL and ELIZABETH GREENGRASS	2020
Evaluating heterogeneous conservation effects of forest protection in Indonesia	Payal Shah, Kathy Baylis	2015	doi:10.1371/journal.pone.0124872
Does the Establishment of Sustainable Use Reserves Affect Fire Management in the Humid Tropics?	Rachel Carmenta et al	2016	DOI:10.1371/journal.pone.0149292
Landscape Changes in PAs in Poland	Anna Zbierska	2022	https://doi.org/10.3390/su14020753
Relating Country-Level Governance and Tree Cover Loss in Sub-Saharan African PAs: Identifying Knowledge Gaps and a More Nuanced Perspective	Dehmel N., et al	2022	doi: 10.3389/ffgc.2022.807214
Indicators for Assessing Habitat Values and Pressures for PAs-An Integrated Habitat and Land Cover Change Approach for the Udzungwa Mountains National Park in United Republic of Tanzania	Andreas B. Brink, Javier MartÌ?nez-LÌ?pez, Zoltan Szantoi, Pablo Moreno-Atencia, Andrea Lupi, Lucy Bastin and GrÌ©goire Dubois	2016	https://doi.org/10.3390/rs8100862
Assessing the role of PAs in the land-use change dynamics of a biodiversity hotspot	Marcelo Henrique Schmit et al	2023	https://doi.org/10.1007/s13280-023-01886-5
Landscape fragmentation of the Natura 2000 network and its surrounding areas	Alexandra LawrenceI et al	2021	https://doi.org/10.1371/journal.pone.0258615
Biological quality of running waters in PAs: the influence of size and land use	Laura Mancini et al	2005
Combining historical aerial photography with machine learning to map landscape change impacts on dry grasslands in the Central Alps	Elisabeth Kinderman et al	2023	https://doi.org/10.1007/s10980-023-01684-0
Effectiveness of Federal PAs in the Preservation of Mangrove Forests on the Coast of the State of Paraiba, Brazil	Iara S. Medeiros et al	2023	DOI 10.1590/0001-3765202320211079
Effectiveness of the Qilian Mountain Nature Reserve of China in Reducing Human Impacts	Shicheng Li et al	2022	https://doi.org/10.3390/land11071071
Reserves protect against deforestation fires in the Amazon	Adeney JM, Christensen NL Jr, Pimm SL	2009	doi:10.1371/journal.pone.0005014
Multiple anthropogenic pressures challenge the effectiveness of PAs in western United Republic of Tanzania	Richard A. Giliba et al	2022	https://doi.org/10.1111/csp2.12684
Elevated fires during COVID-19 lockdown and the vulnerability of PAs	Eklund, J. et al	2022	https://doi.org/10.1038/s41893-022-00884-x
Assessing national human footprint and implications for biodiversity conservation in Iran	Azadeh Karimi, Kendall Jones	2020	https://doi.org/10.1007/s13280-019-01305-8
A global-level assessment of the effectiveness of PAs at resisting anthropogenic pressures	J. Geldmann, et al.	2019	https://doi.org/10.5061/dryad.p8cz8w9kf
COVID-19 lockdown frees wildlife to roam but increases poaching threats in Nepal	Narayan Prasad Koju et al	2021
Land cover dynamics in the Simien Mountains (Ethiopia), half a century after establishment of the National Park	Miro Jacob et al	2017	DOI 10.1007/s10113-016-1070-8
Spatial and temporal deforestation dynamics in protected and unprotected dry forests: a case study from Myanmar (Burma)	Melissa Songer et al.	2008	10.1007/s10531-008-9490-5
Monitoring the light pollution changes of China's mangrove forests from 1992-2020 using nighttime light data	Haihang Zeng et al	2023	doi: 10.3389/fmars.2023.1187702
PAs: mixed success in conserving East Africa's evergreen forests	Marion Pfeifer et al	2012	doi:10.1371/journal.pone.0039337
Monitoring parks through remote sensing: studies in Nepal and Honduras	HARINI NAGENDRA, CATHERINE TUCKER, LAURA CARLSON	2004	10.1007/s00267-004-0028-7
The co-management approach has positive impacts on mangrove conservation: evidence from the mono transboundary biosphere reserve (Togo-Benin), West Africa	Gnansouno	2022	https://doi.org/10.1007/s11273-022-09894-0
Dynamic threats of nighttime light-represented human activities to giant pandas and their habitat	Lingqiao Kong et al	2022	https://doi.org/10.3389/fenvs.2022.1094406
Fire Response to Local Climate Variability: Huascaran National Park, Peru	John All et al	2017	doi: 10.4996/fireecology.130288764
PAs have remarkable spillover effects on forest conservation on the Qinghai‰ÛTibet Plateau	Yu Shen et al.	2022	10.1111/ddi.13466
Global PA impacts	Lucas N. Joppa and Alexander Pfaff	2011	doi:10.1098/rspb.2010.1713
Natura 2000 Areas, Road, Railway, Water, and Ecological Networks May Provide Pathways for Biological Invasion: A Country Scale Analysis	PÌ©ter Szilass et al	2021	https://doi.org/10.3390/plants10122670
Changes in the human footprint in and around Indonesia's terrestrial national parks between 2012 and 2017	AsriA. Dwiyahreni, et al.	2021	https://doi.org/10.1038/s41598-021-83586-2
Deforestation in Continental Ecuador with a Focus on PAs	Janina Kleemann et al	2022	10.3390/land11020268
Rapid and large changes in coastal wetland structure in China's four major river deltas	Xinxin Wang et al	2022	DOI: 10.1111/gcb.16583
PA Effectiveness in Reducing Conversion in a Rapidly Vanishing Ecosystem: The Brazilian Cerrado	Tharsila Carranza, Andrew Balmford, Valerie Kapos, & Andrea Manic	2013	doi: 10.1111/conl.12049
Land-cover changes in and around a National Park in a mountain landscape in the Pyrenees	M.Gracia, et al.	2011	DOI 10.1007/s10113-010-0138-0
Assessment of threat status and management effectiveness in Kakamega forest, Kenya	BÌ?rbel Bleher, Dana Uster, Thomas Bergsdorf	2006	DOI 10.1007/s10531-004-3509-3
The role of PAs in mitigating human impact in the world's last wilderness areas	Emily Anderson, Christos Mammides	2019	https://doi.org/10.1007/s13280-019-01213-x
Global protected-area coverage and human pressure on tidal flats	Narelle K. Hill et al	2020	DOI: 10.1111/cobi.13638
Severe human pressures in the Sundaland biodiversity hotspot	Megha Verma et al	2019	DOI: 10.1111/csp2.169
Assessing naturalness in northern great lakes forests based on historical land-cover and vegetation changes	Urs Gimmi, Volker C. Radeloff	2013	DOI 10.1007/s00267-013-0102-0
Monitoring of organochlorine pesticides in and around Keoladeo National Park, Bharatpur, Rajasthan, India	Bhumesh Singh Bhadouria & Vinod B. Mathur & Rahul Kaul	2012	DOI 10.1007/s10661-011-2340-z

## Sheet: 1.1. Data extraction - Metadata
Covidence #	ID	Title	Reviewer Name	Title	Authors	Year	DOI	Main goal: PAs effectiveness on threats?	Main goal	xScale	Continent	Continent_Ori	Study area	Country	Country_ori	Habitat type	Ecosystem type	Ecosystem description	Study design	Study design description	Temporal comparison within the same PA?	Intervention year start	Monitoring year start	Year (End)	Year (start)	Year (End)	Study duration	Management comparison involved?	Management intervention	Comparison inside-outside involved?	Counterfactual?	Which counterfactual?	Results validation?	Results validation?	Selected study?	Reasons for exclusion	Threat assessment method	Assessment_modified	Threat indicator	Unit of measurement	Method of analysis	Additional variables
387	Alvarado 2018	Management impacts on fire occurrence: A comparison of fire regimes of African and South American tropical savannas in different PAs	Consensus	Management impacts on fire occurrence: A comparison of fire regimes of African and South American tropical savannas in different PAs	Swanni Alvarado, Thiago Silva, Sally Archibald	2018	https://doi.org/10.1016/j.jenvman.2018.04.004	Yes	We evaluated changes in fire regimes caused by management interventions, using as comparative case-studies the Serra do Cipo National Park (Brazil) and the Ibity and Itremo New PAs (Madagascar).	Local	Multiple	South America; Africa	Multiple	Other: Brazil;Madagascar		Terrestrial	Tropical grasslands	NA	BACI	Compared the fire regimes of two recently PAs in Madagascar (Ibity and Itremo NPA) and one in Brazil (Serra do Cipo NP) before and after livestock exclusion and fire suppression policies	Yes						In data extraction	Yes	Livestock exclusion and fire suppression policies	Other land uses	No		No	NA	Selected	NA	Remote sensing	Remote sensing	Extent of burned areas	Total burned area (%), Density of Ignitions (ignition/km2)	Wilcoxon-tests to identify changes in fire regime metrics (density of ignitions, total burned area, and mean and maximum size of burn scars)	NA
385	Andrade-Nunez 2020	Using nighttime lights to assess infrastructure expansion within and around PAs in South America	Consensus	Using nighttime lights to assess infrastructure expansion within and around PAs in South America	MarÌ?a JosÌ© Andrade-NÌ¼Ì±ez and T Mitchell Aide	2020	https://doi.org/10.1088/2515-7620/ab716c	Yes	we evaluate the expansion of infrastructure in and around terrestrial PAs in South America between 2001 and 2011. We specifically answer the following questions:(1) is infrastructure expanding within and around PAs?;(2) is infrastructure expansion related to the IUCN management category?;	Continental	South America	South America	South America	Argentina;Bolivia;Brazil;Chile;Colombia;Ecuador;Guyana;Paraguay;Peru;Suriname;Uruguay;Venezuela	Multiple: America	Terrestrial			CI		Yes				2001	2011	10	No		Buffer	No		Not mentioned		Selected		Spatial analysis	Remote sensing	Nighttime light (NTL) data	expansion area (EXP) and the area of scattered (SC-SC) and aggregated (AG-AG)infrastructure within and around each PA	Distance allocation map
380		Differential vulnerability to biological invasions: not all PAs (and not all invaders) are the same	Consensus	Differential vulnerability to biological invasions: not all PAs (and not all invaders) are the same	Daniel AyllÌ?n, RocÌ?o A. Baquero, Graciela G. Nicola	2022	https://doi.org/10.1007/s10531-022-02407-8	Yes	(1) the number of both regulated and unregulated IAS differ across unPAs, N2K sites and N2K sites with an additional protection status	National	Europe	Europe	Central Spain> Castilla-La Mancha	Other: Spain		Terrestrial	Mediterranean		CI	We framed our study on comparing IAS richness in core areas of PAs to their belt zones (which include peripheries of PAs and the unPAs adjacent to them)	No							Yes	N2k sites with/out additional protected status	Buffer	No		Not mentioned		Selected		Secondary data collection	Others	Species occurrence records	Species richness	Gap analysis
375	Boyle 2021	Road-effect mitigation promotes connectivity and reduces mortality at the population-level	Consensus	Road-effect mitigation promotes connectivity and reduces mortality at the population-level	Sean P. Boyle et al	2021	https://doi.org/10.1016/j.biocon.2021.109230	Yes	quantify the effectiveness of road-effect mitigation structures at reducing reptile and amphibian mortality at promoting connectivity at the population leve	Local	North America	North America	Ontario	Canada		Terrestrial	Dunes, meadows and mixed wood forest) and wetland habitats (i.e., semipermanent flooded meadows, swamp, marsh)		BACI	To evaluate the success of mitigation structures at reducing road mortality of amphibians and reptiles, we conducted a six year paired Before-After-Control-Impact (BACI) experiment. We used road surveys to estimate the effectiveness of exclusion fencing, and a combination of hoop trapping, passive integrated tranå?sponder tag scanners and camera traps to evaluate connectivity structure effectiven…	Yes		2013			2018		Yes	BACI of mitigation structures in road mortality, control site 3 km away in the periphery	Control	Yes	Similar area	Not mentioned		Selected		Field sampling and population monitoring	Field sampling/Interviews	Road mortality of reptiles and amphibians	Detections of live and dead herpetofauna	Hierarchical Generalized Additive Models	Road surveys, camera traps photos, tunnel usage,
360	Cisneros 2022	Impacts of conservation incentives in PAs: The case of Bolsa Floresta, Brazil	Consensus	Impacts of conservation incentives in PAs: The case of Bolsa Floresta, Brazil	ElÌ?as Cisneros et al	2022	https://doi.org/10.1016/j.jeem.2021.102572	Yes	whether complementary conservation incentives can enhance the effectiveness of PAs. It examines an innovative large-scale effort to provide such incentives in multiple-use PAs: the Bolsa Floresta Program (BFP) in the Brazilian state of Amazonas. The BFP offers Payments for Environmental Services (PES) to households and communities in15 of the state‰Ûªs sustainable-use PAs to encourage the conserv…	Regional	South America	South America	Brazilian Amazon	Brazil		Terrestrial	Tropical rainforest		BACI		Yes	2008	2005	2007	2008	2015	12	Yes	The BFP started in 2008, with the dual aim of protecting multiple-use PAs in Amazonas State against deforestation pressures and in order to increase welfare among local residents (BÌ¦rner et al., 2013; Viana et al., 2009). The Bolsa Floresta program is run by the Sustainable Amazonas Foundation (FundaÌ¤Ì£o Amazonas SustentÌÁvel, FAS), a non-governmental organization co-financed by the state of Am…	Control	Yes	Matching	Yes		Selected		Remote sensing	Remote sensing	Annual deforestation	Deforestation rate	Matching	Time-variant, remotely sensed data on forest loss and forest quality with administrative information on reserve area
356		Urban sprawl into Natura 2000 network over Europe	Consensus	Urban sprawl into Natura 2000 network over Europe	Elena D. ConcepciÌ?n	2020	DOI: 10.1111/cobi.13687	Yes	Compare urban covers and growth rates inside and outside Natura 2000	Continental	Europe	Europe	European Union (28)	Portugal;Spain;France;Belgium;Netherlands;Luxembourg;Germany;Ireland;United Kingdom;Denmark;Sweden;Finland;Estonia;Latvia;Lithuania;Poland;Czechia;Slovakia;Austria;Hungary;Romania;Bulgaria;Italy;Slovenia;Croatia;Greece;Switzerland;Serbia;Montenegro;Bosnia and Herzegovina;Albania	Multiple: Europe	Terrestrial	Multiple	NA	CI	urban covers and growth rates were calculated for each year from 2006 to 2015 inside and outside the Natura network	Yes	NA	NA	NA	2006	2015		No	NA	Other: Outside	No		Not mentioned	NA	Selected	NA	Remote sensing	Remote sensing	Urbanization	Urban cover and growth rate	Linear mixed-effects models	Member state, site area, total number of habitats or species of conservation concern
354	Conciani 2021	Human-climate interactions shape fire regimes in the Cerrado of SÌ£o Paulo state, Brazil	Consensus	Human-climate interactions shape fire regimes in the Cerrado of SÌ£o Paulo state, Brazil	Dhemerson E. Conciani, Lucas Pereira dos Santos, Thiago Sanna Freire Silva, Giselda Durigan, Swanni T. Alvarado,	2021	https://doi.org/10.1016/j.jnc.2021.126006.	No	We reconstructed the historical fire regime of three PAs (PA) and their buffer zones in SÌ£o Paulo state to understand how current fire exclusion policies are affecting fire regimes and to measure how human-climate-fire relationships can change in areas under different land management	Regional	South America	South America	Cerrado	Brazil		Terrestrial	Tropical savanna		CI	We reconstructed the historical fire regime of three PAs (PA) and their buffer zones in SÌ£o Paulo state to understand how current fire exclusion policies are affecting fire regimes and to measure how human-climate-fire relationships can change in areas under different land management	Yes	1980			1984	2017	33 years	Yes	Fire exclusion policy since the 1980s	Buffer	No		Not mentioned		Selected	NA	Remote sensing	Remote sensing	Burned area	Burned area, variations in fire frequency and fire size among sites		Rainfall data from weather stations was also used to analyze the relationship between climate and fire, LU and tree cover
351	deCarvalho 2023	How does the fire regime change after creating a PA in the Brazilian Cerrado?	Consensus	How does the fire regime change after creating a PA in the Brazilian Cerrado?	Izadora S. de Carvalho et al.	2023	https://doi.org/10.1016/j.jnc.2022.126318	Yes	Reconstruct the fire history over 28 years for the park and its surroundings (20 km buffer area), endeavouring to understand the impact of the creation of this National Park on its fire regime	Local	South America	South America	Cerrado	Brazil		Terrestrial	Tropical savanna	NA	BACI	The fire regime was determined between 1990 and 2017, totaling 28 years of fire records, including thus the period before (1990‰ÛÒ2005, 16 years) and after (2006‰ÛÒ2017, 12 years) the park creation.	Yes	2007 to 2012	1990	2005	2006	2017	28	Yes	BA PA creation, fire combat operation plan (2007)	Buffer	No		Not mentioned	NA	Selected	NA	Remote sensing	Remote sensing	Fire	Total annual burned area, burned area %, density ignition, mean burn scar area and fire frequency	ANOVA	Land use data
340		Assessment of National Parks affected by naturbanization processes in Southern Europe	Consensus	Assessment of National Parks affected by naturbanization processes in Southern Europe	M. Calvache, et al.	2016	http://dx.doi.org/10.1080/09640568.2015.1083416	No	Comparative analysis of land-use changes inside and in the proximity of three PAs in France, Portugal and Spain, in order to contrast land-use dynamics in protected and unprotected territories and to identify possible threats to these areas	Local	Europe	Europe	NA	Portugal;France;Spain	Multiple: Europe	Terrestrial	Mountainous area	Portugal, France, Spain	CI	Comparative case study	Yes	NA	NA	NA	1990	2006	17	No	NA	Buffer	No		Not mentioned	NA	Selected	NA	Spatial analysis	Remote sensing	Change in land cover	(1) extensification, land converted to forest and semi-natural areas; (2) medium intensification, transformation of habitats into agriculture; (3) strong intensification, when artificialization of agricultural or natural lands takes place	Transition matrix for LULCC	1. Artificial surfaces 2. Agricultural areas 3. Forest and seminatural areas 4. Wetlands and water bodies
339		Compound impact of land use and extreme climate on the 2020 fire record of the Brazilian Pantanal	Consensus	Compound impact of land use and extreme climate on the 2020 fire record of the Brazilian Pantanal	Maria Lucia Ferreira Barbosa et al	2022	DOI: 10.1111/geb.13563	No	quantify the influence of climate and land use on major fires that occurred during the 2020 drought over the Brazilian Pantanal region	Regional	South America	South America	Alto Paraguay Basin, central-western flank of Brazil	Brazil		Other: Terrestrial and freshwater	Wetlands, forests, savannas, grasslands, rivers and lakes	Largest wetland in the world	CI	We assessed the burned areas within land-use classes and land tenure (2003 - 2020)	Yes				2003	2020		No		Other land uses	No		Not mentioned		Selected		Remote sensing	Remote sensing	Fire	Total area burned	Fire recurrence maps	Precipitation and sea surface temperature, land use and water area extent
329		An integrative analysis of threats affecting PAs in a biodiversity stronghold in Southeast Mexico	Consensus	An integrative analysis of threats affecting PAs in a biodiversity stronghold in Southeast Mexico	O. GodÌ?nez-Gomez, et al	2019	https://doi.org/10.1016/j.gecco.2020.e01297	Yes	To gain a better understanding of the dynamics of threats affecting our focal PAs, we assessed their variation within and in the vicinity of PAs.	Local	South America	South America	Sierra Madre de Chiapas	Other: Mexico		Terrestrial	Tropical rainforests, deciduous and tropical montane cloud forests		CI	Threats dynamics affecting our focal PAs, we assessed their variation within and in the vicinity of PAs	Yes	NA	NA	NA	2010	2015	5	No	NA	Buffer	No		Not mentioned	NA	Selected	NA	Remote sensing	RS - Threat indices	Human Pressure Index (HPI)		Changes in LULCC	Forest cover, mining activity, fire hotspots, human population
327	Gonson 2017	Influence of settings management and protection status on recreational uses and pressures in marine PAs	Consensus	Influence of settings management and protection status on recreational uses and pressures in marine PAs	G. Charles, et al	2017	http://dx.doi.org/10.1016/j.jenvman.2017.05.051	No	We examined the influence of protection status on these pressure estimates and investigated the relationship between motivation and practices.	Local	Australia	Australia	New Caledonia	Other: New Caledonia		Marine	Islets		CI	investigated the effects of MPAs on recreational users‰Ûª practices and motivations near the main urban center of New Caledonia using a questionnaire-based survey. Then, by combining questionnaires and boat count data, we estimated pressures for a range of activities and behaviors, as well as user site selection criteria	No	NA	NA	NA	2013	2014	1	No	NA	Other: Non-protected	No		Not mentioned	NA	Selected	NA	Questionnaire-based survey	Field sampling/Interviews	Pressure index	Boat counts and interview data	Logistic binomial models
324	Green 2013	Deforestation in an African biodiversity hotspot: Extent, variation and the effectiveness of PAs	Consensus	Deforestation in an African biodiversity hotspot: Extent, variation and the effectiveness of PAs	Jonathan M.H. Green et al	2013	https://doi.org/10.1016/j.biocon.2013.04.016	No	develop the first spatially explicit, high-resolution model of past evergreen forest and miombo woodland change in the Eastern Arc Mountains, based upon potential predictors of habitat loss and retention. We then use this model to predict likely future changes and to consider how habitat loss varies between protected and non-PAs	Regional	Africa	Africa	Eastern Arc Mountains	Other: United Republic of Tanzania		Terrestrial	Tropical moist forests		CI		Yes				1975	2000	25	No		Other: Outside	Yes	Other: In order to control for this, we fitted the models using pixels that were not protected in 2000	Yes	Cross-validation	Selected		Remote sensing	Remote sensing	LULCC	Rates of habitat loss	Generalised additive models	Land use change (1975‰ÛÒ2000), Distance to edge (m), Travel time (min), distance to roads, markets and water. altitude, slope, land value, population density, etc
322		Is the Natura 2000 network effective to prevent the biological invasions?	Consensus	Is the Natura 2000 network effective to prevent the biological invasions?	Carlos Guerra et al	2018	https://doi.org/10.1016/j.gecco.2018.e00497	Yes	compared the total IAS between protected (N2000) and unprotected sites (2) analyzed the effect of an additional protection as national park or nature reserve on the total IAS; and (3) assessed the contribution of human pressure to explain the occurrence of IAS within the network	Regional	Europe	Europe	Castilla-La Mancha	Other: Spain		Other: Terrestrial and freshwater			CI		No							Yes	N2k sites and additional PAs protection	Same PAs (Different gradients)	No		Not mentioned		Selected		Secondary data collection	Others	Invasive species occurrence	IAS total number	Gap analysis	Occurrence data
321		Worldwide increase in Artificial Light At Night around PAs and within biodiversity hotspots	Consensus	Worldwide increase in Artificial Light At Night around PAs and within biodiversity hotspots	A. GuettÌ© et al	2018	https://doi.org/10.1016/j.biocon.2018.04.018	No	Assess the spatial and temporal trends in the anthropization at a global scale within and around PAs and BH	Global	Other: Global	Other: Global		Other: Global		Terrestrial	Multiple		CI	We used this proxy to assess the spatial and temporal trends in the anthropization at a global scale within and around PAs and BH	Yes	NA	NA	NA	1993	2012	20	No	NA	Other: Outside	No		Not mentioned	NA	Selected	NA	Remote sensing	Remote sensing	ALAN	Mean ALAN	Linear regression	Artificial Light At Night (ALAN), Biodiversity hotspots (BHs), biogeographical regions
319	Haruna 2014	Evolving protected-area impacts in Panama: impact shifts show that plans require anticipation	Consensus	Evolving protected-area impacts in Panama: impact shifts show that plans require anticipation	Akiko Haruna et al	2014	doi:10.1088/1748-9326/9/3/035007	Yes	Focusing on Panama per se, improving estimates of PA impacts there by applying recent methods to estimate the baseline deforestation that would have occurred without protection	National	Other: Central America	Other: Central America		Other: Panama		Terrestrial	Tropical humid and dry forest		CI (Matching)	to remove the influences of differences in relevant observable characteristics, ordinary least squares (OLS) regression is an option yet if control group characteristics differ greatly, the burden to control for factors can be considerable	Yes	1992	2000		2000	2008		No	Panama‰Ûªs PA system is administered by the National Environment Authority (ANAM), a government agency established in 1998. ANAM recently shifted from a ‰Û÷command-and- control‰Ûª to a more ‰Û÷community-based‰Ûª emphasis, including economic incentive. Since 2008, funding for capacity building in forest governance has come from the World Bank‰Ûªs ‰Û÷REDD readiness‰Ûª program and UN REDD progra	Control	Yes	Matching	Yes	NA	Selected		Remote sensing	Remote sensing	LULCC		Matching	Drivers of deforestation include elevation, slope, distances from roads, urban areas and rivers, provinces, lifezones/ecoregions and agricultural suitability
317	Hirons 2022	Assessing variation in the effectiveness of IUCN PA categorisation. What remotely sensed forest integrity and human modification reveals across the major tropical forest biomes	Consensus	Assessing variation in the effectiveness of IUCN PA categorisation. What remotely sensed forest integrity and human modification reveals across the major tropical forest biomes	Samuel Hirons et al.	2022	10.1016/j.ecolind.2022.109337	Yes	Evaluate the effectiveness of IUCN PA categorization in mitigating human modification and maintaining forest integrity across major tropical forest biomes.	Regional	Other: Multiple	Other: Multiple	The Congo Basin, insular Indonesia, Malaysia and the Tropical Andes	Democratic Republic of the Congo;Gabon;Indonesia;Malaysia;Colombia;Peru		Terrestrial	Topical forest	Democratic Republic of Congo; Republic of Congo; Gabon, Indonesia; Malaysia; Colombia; Peru	CI	The study analyzed the representation of ecoregions and levels of human modification and forest integrity within PAs (PAs) using remote sensing data and a generalized linear modeling approach.	No							Yes	IUCN categories	PAs different categories	No		Not mentioned		Selected		Remote sensing	RS - Threat indices	Human modification levels and forest integrity	Various indices derived from remote sensing data	Generalized linear modeling	PA size, geographic location, IUCN management category, Global Human Modification of Terrestrial Systems, Forest Landscape Integrity Index (FLII)
314	Hua 2022	Continuous growth of human footprint risks compromising the benefits of PAs on the Qinghai-Tibet Plateau	Consensus	Continuous growth of human footprint risks compromising the benefits of PAs on the Qinghai-Tibet Plateau	Ting Hua, et al	2022	https://doi.org/10.1016/j.gecco.2022.e02053	No	Map the human footprint as a proxy for identifying the intensity of human activities on the Qinghai-Tibet Plateau and therein nature reserves (NRs, the primary category of PAs in China)	Regional	Asia	Asia	Qinghai-Tibet Plateau	China		Terrestrial	Alpine meadows and alpine steppes		CI		Yes		2000	2010	2011	2020		No		Other: Outside	No		Yes	Five hundred random sample points with a size of 1 km2 were employed to interpret the human footprint visually.	Selected		Remote sensing	Remote sensing	LULCC	Human footprint	Linear regression	7: Land cover, night time light, grazing intensity, population density, Annual mean temperature and annual precipitation data, DEM, carbon sequestration, soil retention, sandstorm prevention, water retention from Ouyang et al. (2016) and habitat quality
310	Islam 2019	Analyzing multi-temporal satellite imagery and stakeholders' perceptions to have an insight into how forest co-management is changing the PA landscapes in Bangladesh	Consensus	Analyzing multi-temporal satellite imagery and stakeholders' perceptions to have an insight into how forest co-management is changing the PA landscapes in Bangladesh	Kazi Nazrul Islam et al	2019	https://doi.org/10.1016/j.forpol.2019.01.011	No	Satellite imageries of two randomly selected important PAs of the country-Lawachara National Park (LNP) and Teknaf Wildlife Sanctuary (TWS) - were analyzed and linked to people's perception in understanding the conservation dynamics in the co-managed PA	Local	Asia	Asia		Other: Bangladesh		Terrestrial	Tropical semi-evergreen forest		BA		Yes	2004	2004	2011	2011	2017		Yes	Comanagement	None	No		Yes	hus, co-management stakeholders (local people actively participating in co-management activities and the local forest officials) and non-stakeholders or control (local people having no involvement in co-management activities) were consulted to understand their views on the type and extent of changes co-management might have brought about in the selected PAs.	Selected		Remote sensing	Remote sensing	LULCC	Rate of forest cover loss	Binary logistic regression model	Stakeholders perception about the outcome of co-management activities
302	Kenyon 2018	Business as usual for the human use of Moreton Bay following marine park zoning	Consensus	Business as usual for the human use of Moreton Bay following marine park zoning	R. A. Kenyon et al	2017	https://doi.org/10.1071/MF16400	Yes	We measured trends in the human use of no-take areas using observed vessel position and categorisation during on-water and aerial surveys before and after rezoning.	Local	Australia	Australia	Southern Queensland coast	Other: Australia		Marine	Tidal waters, including many estuaries, and extends seawards		BACI	We sampled the MBMP, observing fishing and non-fishing activities in the MNP, conservation park zones (CPZ) and general use control areas using both on-water and aerial surveys, before and after rezoning.	Yes	2009	2008	2009	2009	2011		Yes	New marine national park (MNP) zones were established in March 2009 increasing the extent of PAs from 0.5 to 16%. Four levels of zoning were implemented in the MBMP affecting the activities of both recreational and commercial fishers, and possibly other park users: (1) MNP zones were the most restrictive, with no extractive activity; (2) CPZs allow fishing and some collecting, but trawling and ne…	Control	Yes	Similar area	Yes	On-water observations complemented years of operational experience on Moreton Bay in order to validate vessel categorisations made from the air	Selected		Field survey	Field sampling/Interviews	Fishing pressure	Percentage of all vessels within the footprint of the MNP and the adjacent control area of similar habitat	Binomial GLMs	Boat and aerial surveys
301	Khalyani 2013	Ecological indicators for protection impact assessment at two scales in the Bozin and Marakhil PA, Iran	Consensus	Ecological indicators for protection impact assessment at two scales in the Bozin and Marakhil PA, Iran	Azad Henareh Khalyani et al	2013	http://dx.doi.org/10.1016/j.ecolind.2012.09.011	No	Evaluate the effects of eight years of protection on forest cover and landscape structure in a semi-arid landscape	Local	Asia	Asia	Zagros forest	Other: Iran		Terrestrial	Semi-arid oak forest		CI		Yes				2001	2009	8	No		Buffer	Yes	Similar area	Not mentioned		Selected		Remote sensing	Remote sensing	Habitat fragmentation	Landscape structure metrics	Random forest
299	Kivinen 2015	Many a little makes a mickle: Cumulative land cover changes and traditional land use in the Kyro reindeer herding district, northern Finland	Consensus	Many a little makes a mickle: Cumulative land cover changes and traditional land use in the Kyro reindeer herding district, northern Finland	Sonja Kivinen	2015		No	Land cover changes were studied over the past 25 - 50 years in order to examine accumulation of various pressures on reindeer grazing grounds. Compare land cover disturbances within and outside existing conservation areas	Local	Europe	Europe	Kyro reindeer herding district	Other: Finland		Terrestrial	Coniferous forests		CI		Yes				1987	2013		No		Other: Outside	No		Yes	The accuracy of forest cover classification was assessed for the year 2013 using aerial photographs acquired in 2010 and 2013	Selected		Remote sensing	Remote sensing	LULCC	Forest cover changes	Spatial analysis	Topographic maps (road network was examined in the 1960s,1980s and 2010)
295	Kusimi 2015	Characterizing land disturbance in Atewa Range Forest Reserve and Buffer Zone	Consensus	Characterizing land disturbance in Atewa Range Forest Reserve and Buffer Zone	John Manyimadin Kusimi	2015	http://dx.doi.org/10.1016/j.landusepol.2015.08.020	No	Spatial and temporal changes in land cover of Atewa Range Forest Reserve and it‰Ûªs buffer between 1986 and 2013 using remote sensing	Local	Africa	Africa	Ghana‰Ûªs Upper Guinea Forests	Other: Ghana		Terrestrial	Sub-montane		CI		Yes	1994			1980	2013		Yes	Wildlife policy	Buffer	No		Not mentioned		Selected		Remote sensing - Interviews	Remote sensing	LULCC - RAPPAM	LULCC	Image classification
294		Are MPAs effective in removing fishing pressure from benthic species and habitats?	Consensus	Are MPAs effective in removing fishing pressure from benthic species and habitats?	Rebecca Langton et al	2020	https://doi.org/10.1016/j.biocon.2020.108511	No	Compares fishing pressure inside and outside areas covered by Scottish MPAs and MPA management measures	Local	Europe	Europe		Other: Scotland		Marine	Benthic habitats		CI	Compares fishing pressure inside and outside areas covered by Scottish MPAs and MPA management measure	Yes				2013	2015	3	Yes	1) all areas where management measures applied, 2) measures where dredging is prohibited, 3) measures where bottom trawling is prohibited, and 4) measures where both dredging and bottom trawling are prohibited	PAs different categories	No		Not mentioned		Selected		Vessel Monitoring System	Field sampling/Interviews	Fishing instensity	Swept Area Ratio (total swept area (km2 ) / area of MPA (km2))	Total swept area	Bottom Ruggedness Index, Records of species of conservation interest
292		Land use and landscape pattern changes on the inside and outside of PAs in urbanizing Selangor state, peninsular Malaysia	Consensus	Land use and landscape pattern changes on the inside and outside of PAs in urbanizing selangor state, peninsular Malaysia	Woon Hang Lee	2019		No	How landscape patterns of PAs change in the rapidly urbanizing process, particularly in developing countries? To address the question, the level of fragmentation, naturalness, and connectedness of PAs and its 5 km zone outside were quantified, in Selangor State, Peninsular Malaysia across 24 years	Local	Asia	Asia	Peninsular Malaysia	Other: Malaysia		Terrestrial			CI		Yes				1988	2012	24	No		Buffer	No		Yes	accuracy assessment was carried out to validate the accuracy of supervised classification through the testing of these classifications with the reference pixels or values.	Selected		Remote sensing	Remote sensing	LULCC	Degree of fragmentation, the intensity of human impact and structural connectedness for these wildlife reserves	Fragmentation, connectedness, land use intensity and transformation analysis	Built-up area, bare land, commercial agriculture, paddy and other agriculture, water body, and forest.
288	Li 2020	Human pressure dynamics in PAs of China based on nighttime light	Consensus	Human pressure dynamics in PAs of China based on nighttime light	Guangyu Li	2020		Yes	We assessed the extent and intensity of NTLs within and around the PAs during 1992 2012 in mainland China	National	Asia	Asia	Mainland China	China		Terrestrial			CI		Yes				1992	2012		No		Buffer	No		Not mentioned		Selected		LULCC	Remote sensing	Nighttime lights	Extent and intensity of NTLs	Lighted area index (LAI) and potential LAI (PLAI)	DEM, geographical division and administrative division data
286	Li 2018	Human footprint in Tibet: Assessing the spatial layout and effectiveness of nature reserves	Consensus	Human footprint in Tibet: Assessing the spatial layout and effectiveness of nature reserves	Shicheng Li	2018	https://doi.org/10.1016/j.scitotenv.2017.11.216	Yes	The human footprint map was also used to evaluate the effectiveness of national and provincial NRs for reducing the impact of human activities.	National	Asia	Asia	Tibet	Other: Tibet		Terrestrial	Multiple		CI		Yes				1990	2010	20	No		Control	Yes	Other: Buffer analysis	Not mentioned		Selected		Remote sensing	RS - Threat indices	HFI	Changes in mean HFS		Population density, land use intensity, grazing intensity, road and railways, and the electricity infrastructure
280	Liu 2022	Effectiveness of functional zones in National Nature Reserves for the protection of forest ecosystems in China	Consensus	Effectiveness of functional zones in National Nature Reserves for the protection of forest ecosystems in China	Fangzheng Liu et al	2022	https://doi.org/10.1016/j.jenvman.2022.114593	Yes	We examined the changes in forest cover loss through a time series test and trend analysis, using Global Forest Watch data from 2001 to 2018. We quantified the differences in forest conservation between core, buffer, and experimental zones and identified which zones better prevented forest loss	National	Asia	Asia	Multiple	China		Terrestrial	Cool temperate, temperate, subtropical, and tropical zones		CI	We investigated National Nature Reserves (NNRs) in China to explore and quantify the conservation in their core, buffer, and experimental zones.	Yes				2001	2018		No		Same PAs (Different gradients)	No		Not mentioned		Selected		Spatial analysis	Remote sensing	Forest loss	Proportion of forest loss	Canonical correlation analysis
279		Landscape change in Southern Ecuador: An indicator-based and multi-temporal evaluation of land use and land cover in a mixed-use PA	Consensus	Landscape change in Southern Ecuador: An indicator-based and multi-temporal evaluation of land use and land cover in a mixed-use PA	Santiago LÌ?pez et al	2020	https://doi.org/10.1016/j.ecolind.2020.106357	Yes	What are the impacts on landscape composition and configuration associated with the stablishment of COPF in 2000 and the enactment of PADDD in 2012?	Local	South America	South America	Southern Ecuador	Other: Ecuador		Terrestrial	Tropical Andes		CI		Yes	2012	1989	2001	1989	2016		Yes	Downsizing of the PA (2012)	None	No		Yes		Selected		Remote sensing	Remote sensing	LULCC	LULCC patterns		1) recent burned areas (BUR); 2) mixed development including residential, roads, and other infrastructure (MXD); 3) bare or exposed soils (BARE); 4) active pastures and agricultural areas (AGRP); 5) succession vegetation after human-induced disturbances (SUV) which may include areas with old pastures, native grasses, and/or bracken fern; 6) evergreen upper montane forest and humid shrub (UMV); an…
273		A global assessment of the human pressure on the world's lakes	Consensus	A global assessment of the human pressure on the world's lakes	Christos Mammides	2020	10.1016/j.gloenvcha.2020.102084	Yes	I use the database of the world's lakes (Messager et al., 2016), the human footprint index from 1993 and 2009 (Venter et al., 2016b), and the human modification index from 2016 (5) Are PAs successful in mitigating human pressure within the world's lakes? This is the first study to address these questions at a global level	Global	Other: Global	Other: Global		Other: Global		Freshwater	Lakes		CI (Matching)	Quasi-experimental matching	No				1993	2016	16	No		Control	Yes	Matching	Not mentioned		Selected		Human footprint index, human modification index	RS - Threat indices	Human pressure on lakes	Index values (0-50 for human footprint, 0-1 for human modification)	Zonal statistics	Human settlements (population density, built-up areas), Agriculture, Transportation, Mining and energy production, Electrical infrastructure, Key Biodiversity Areas
270		Recent land cover changes in Spain across biogeographical regions and protection levels: Implications for conservation policies	Consensus	Recent land cover changes in Spain across biogeographical regions and protection levels: Implications for conservation policies	JesÌ¼s MartÌ?nez-FernÌÁndez et al	2015	10.1016/j.landusepol.2014.11.021	Yes	We examined the main processes of land cover change in Spain during c.20 years (1987‰ÛÒ2006), using CORINE land cover maps and five comparative spatial frameworks based on biomes (temperate and Mediterranean) and protection levels (Nationally Designated areas, European Natura Net 2000 and unPAs)	National	Europe	Europe	Spain	Other: Spain		Terrestrial	Mediterranean and temperate biomes		CI	The study analyzes land cover changes over 20 years using CORINE land cover maps, comparing different biogeographical regions and protection levels.	Yes				1987	2006	20	Yes	Comparison of Nationally Designated PAs, European Natura Net 2000, and unPAs.	Buffer	No		Not mentioned		Selected		Remote sensing	Remote sensing	LULCC	Area (hectares)	Statistical analysis of land cover data	Biogeographical region, protection level
267	Meng 2022	Effectiveness in PAs at resisting development pressures in China	Consensus	Effectiveness in PAs at resisting development pressures in China	Ziqi Meng et al	2022	https://doi.org/10.1016/j.apgeog.2022.102682	Yes	Evaluated the ability of 290 national-level PAs in China to reduce the impacts of economic development pressures using remote sensing-based fine resolution impervious surface area (ISA) and nighttime light (NTL) data as proxies of development pressure	National	Asia	Asia	China	China		Other: Terrestrial and freshwater	44 forest ecosystems, 3 grassland meadows, 42 inland wetlands, 10 desert ecosystems, 12 wild plants, and 79 wild animal refuges		CI		Yes				2000	2018		No		Buffer	No		Yes		Selected		Remote sensing	RS - Threat indices	Development pressure	Changes in development pressure	Linear regression	impervious surface area (ISA) and nighttime light (NTL), population outside PAs
266		European National Parks protect their surroundings but not everywhere: A study using land use/land cover dynamics derived from CORINE Land Cover data	Consensus	European National Parks protect their surroundings but not everywhere: A study using land use/land cover dynamics derived from CORINE Land Cover data	Mario Mingarro, Jorge M. Lobo	2023	https://doi.org/10.1016/j.landusepol.2022.106434	No	Based on the CORINE Land Cover data, we describe the land use-land cover changes in European National Parks, both inside and at distant surrounding areas (1, 5, 20 km), and examine if the detected pattern is homogeneous across Europe. estimate if the declaration of these PAs has acted as a barrier constraining the alteration of natural habitats or as an attractor that has promoted them	Continental	Europe	Europe		United Kingdom; Ireland; Portugal; Spain; France; Belgium; Netherlands; Luxembourg; Germany; Denmark; Sweden; Finland; Estonia; Latvia; Lithuania; Poland;Czechia; Slovakia; Austria; Hungary; Romania; Bulgaria; Italy; Slovenia; Croatia; Greece; Switzerland; Serbia; Montenegro; Bosnia and Herzegovina; Albania; Ukraine; Belarus;Norway;Russia	Multiple: Europe	Terrestrial		25 EU countries	BACI		Yes	1980	1986		1986	2018		Yes	1986‰ÛÒ1998 (CLC-1990), 1999‰ÛÒ2001 (CLC-2000), 2005‰ÛÒ2007 (CLC-2006), 2011‰ÛÒ2012 (CLC-2012), and 2017‰ÛÒ2018 (CLC-2018). The broad temporal spectrum (1990‰ÛÒ2018) t	Buffer	No		Not mentioned		Selected		Remote sensing	Remote sensing	LULCC	Rates of anthropization and naturalization	Generalized Linear/Nonlinear Models (GLZ)	Area size and the declaration year of National Parks BA 1980
264		Terrestrial PAs do not fully shield their streams from exogenous stressors	Consensus	Terrestrial PAs do not fully shield their streams from exogenous stressors	Victor Hugo dos Santos Mollmann et al	2022	10.1017/S0376892922000261	Yes	We compare water quality within PAs and non-PAs in southern Brazil, encompassing remnants of the Atlantic Forest biome, to assess whether PAs serve as a buffer from external pressures for aquatic ecosystems within their boundaries	Regional	South America	South America	Southern Brazil - Atlantic Forest	Brazil		Freshwater	Rivers and streams		CI	water quality within PAs and non-PAs in southern Brazil, encompassing remnants of the Atlantic Forest biome	No				2020-11-01	2021-11-01		No		Buffer	No		Not mentioned		Selected		Field sampling	Field sampling/Interviews	Water pollution	Water quality	ANOVA	physicochemical, biological, pesticide and pharmaceutical parameters
261		Are ranger patrols effective in reducing poaching-related threats within PAs?	Consensus	Are ranger patrols effective in reducing poaching-related threats within PAs?	Jennifer F. Moore et al	2017	DOI: 10.1111/1365-2664.12965	Yes	We used 10 years (2006‰ÛÒ2015) of ranger-based monitoring data and dynamic multi-season occupancy models to quantify poaching-related threats, to examine factors influencing the spatio-temporal dynamics of these threats and to test the efficiency of management actions to combat poaching in Nyungwe National Park (NNP), Rwanda. Efficacy of ranger patrols in reducing poaching-related threats in NNP	Local	Africa	Africa	Southwestern Rwanda	Other: Rwanda		Terrestrial	Tropical, montane forest		CI		Yes	2006			2006	2015	10	Yes	Effectiveness of anti-poaching patrol	None	No		Not mentioned		Selected		Field survey	Field sampling/Interviews	Ranger-based monitoring (RBM)	Annual probability of occupancy of poaching-related threats	Dynamic multi-season occupancy modelling	Elevation, distance to the nearest ranger post, nearest road, nearest tourist trail and park boundary
258	Nikolich 2021	The sources and prevalence of anthropogenic noise in Rockfish Conservation Areas with implications for marine reserve planning	Consensus	The sources and prevalence of anthropogenic noise in Rockfish Conservation Areas with implications for marine reserve planning	Katrina Nikolich et al	2021	https://doi.org/10.1016/j.marpolbul.2021.112017	Yes	We compared noise levels at three RCAs with adjacent unprotected reference sites from August 2018‰ÛÒJune 2019.	Local	North America	North America	Salish Sea	Canada		Marine			CI		Yes				2018	2019	10 months	No		Other: Outside	No		Not mentioned		Selected		Filed sampling	Field sampling/Interviews	Underwater noise pollution	Vessel noise	Logistic regression	Rockfish surveys, boat noise and the amount of shipping activity
257	Olsoy 2016	Quantifying the effects of deforestation and fragmentation on a range-wide conservation plan for jaguars	Consensus	Quantifying the effects of deforestation and fragmentation on a range-wide conservation plan for jaguars	Peter J. Olsoy et al.	2016	10.1016/j.biocon.2016.08.037	Yes	Assessing deforestation and fragmentation impacts on jaguar conservation units and corridors. determine intercountry variability in deforestation within protected and unprotected sections of JCUs and corridors.	Continental	Other: America	Other: America	From North to South America	Mexico; Guatemala; Belize; El Salvador; Honduras; Nicaragua; Costa Rica; Panama; Colombia; Venezuela; Ecuador; Peru; Brazil; Bolivia; Paraguay; Guyana; Suriname; French Guiana	Multiple: America	Terrestrial	Forests and non-forest biomes (Savannas and drylands)		CI		Yes				2000	2012	12	No		Other: Outside	No		Not mentioned		Selected		Remote sensing	Remote sensing	Deforestation	Change in forest cover	Statistical analysis of forest change and fragmentation metrics	Difference between countries
245		A twenty year GIS-based assessment of environmental sustainability of land use changes in and around PAs of a fast developing country: Spain	Consensus	A twenty-year GIS-based assessment of environmental sustainability of land use changes in and around PAs of a fast-developing country: Spain	David RodrÌ?guez-RodrÌ?guez et al	2019	https://doi.org/10.1016/j.jag.2018.08.006	Yes	We used CORINE Land Cover (CLC) data between 1987 and 2006 to assess differences in LULC changes and processes of change as metrics of effectiveness in four PA networks of clear legal and managerial characteristics in Spain: Nature reserves (NRs), Nature parks (NPs), Sites of Community Importance (SCIs) and Special Protection Areas (SPAs)	National	Europe	Europe	Spain	Other: Spain		Terrestrial	Alpine, Atlantic, Mediterranean and Macaronesia		CI	We also compared LULC changes and processes of change around each PA network applying a modified Before-After-Control-Impact (BACI) research design with two increasingly distant control areas and two models of increased validity	Yes				1987	2006		Yes	PA categories	Buffer	No		Yes		Selected		Remote sensing	Remote sensing	LULCC	LULCC %	Spatial analysis	Buffers
243		Development stressors are stronger than PA management: A case of the Pantanos de Centla Biosphere Reserve, Mexico	Consensus	Development stressors are stronger than PA management: A case of the Pantanos de Centla Biosphere Reserve, Mexico	Mayra Isabel De la Rosa-VelÌÁzquez et al.	2017	10.1016/j.landusepol.2017.06.009	Yes	To assess the effectiveness of a coastal PA, we estimated the land-use change (LUC) within and outside of the Pantanos de Centla Biosphere Reserve (PCBR) and interviewed key stakeholders to identify the main stressors causing LUC	Local	North America	North America	Southern coast of the Gulf of Mexico	Other: Mexico		Other: Coastal	Costland wetland	Wetlands, mangrove forests, hydrophyte communities and flooded logwood forest	CI		Yes				1992	2014	24	No		Buffer	No		Yes		Selected		Remote sensing	Remote sensing	LULCC	Percentage of vegetation cover	Quantitative spatial analysis and qualitative stakeholder interviews	Interviews
237		Protection status and national socio-economic context shape land conversion in and around a key transboundary PA complex in West Africa	Consensus	Protection status and national socio-economic context shape land conversion in and around a key transboundary PA complex in West Africa	Henrike Schulte to Buhne et al	2017	doi: 10.1002/rse2.47	Yes	Investigate the impact of anthropogenic pressure from land cover change in and around the W-Arly-Pendjari (WAP) complex. assess the ability of the WAP complex to reduce pressures on biodiversity arising from agricultural expansion	Regional	Africa	Africa	West Africa	Benin;Burkina Faso;Niger		Terrestrial	Grassland, shrub savannah and savannah woodlands, with some gallery forests and riparian vegetation/marshlands around water bodies		CI	Land cover classifications in and around PAs	Yes				2000 - 2006	2013	13	No	On-the-ground management started in 2006 as part of the EU-funded ECOPAS project	Buffer	No		Yes	Training pixels were randomly split into training and validation pixels before classification. In total, 40% of original pixels were used for validation	Selected		Remote sensing	Remote sensing	LULCC	Natural vegetation loss rate	Random Forest classifier
234	Shackleton 2020	Assessing biological invasions in PAs after 30 years: Revisiting nature reserves targeted by the 1980s SCOPE programme	Consensus	Assessing biological invasions in PAs after 30 years: Revisiting nature reserves targeted by the 1980s SCOPE programme	Ross T. Shackleton et al.	2020	10.1016/j.biocon.2020.108424	Yes	threat and management of invasive species has changed in 21 PAs that were analysed as part of the international SCOPE programme on biological invasions in the mid-1980	Local	Other: Multiple	Other: Multiple	Multiple	United Republic of Tanzania; South Africa; Indonesia; Australia;United States of America; New Zealand; Scotland; Seychelles; Ecuador	Multiple	Terrestrial	Arid and semi-arid land (desert), Mediterranean areas, tropical savannas and dry woodlands and islands	Countries: 21	BA	Collated data for the same PAs that were studied during the SCOPE programme and assess how biological invasions and their management have changed over the last ~30 years. We gave special attention to the threat that IAS impose and to assessing current and past management efforts that are in place to mitigate their impacts	Yes	1980 (Initial study)				2018 (Current assessment	30	Yes	Long-term management programs and additional ad hoc approaches were implemented in many PAs.	None	No		Yes	Data were validated through comparisons with historical records and expert input from park managers	Selected		Surveys and questionnaires to park managers	Field sampling/Interviews	Invasive species	Number of IAS	Paired sample t-tests and chi-squared tests for categorical changes	management strategies, ecological context, and socio-economic factors
233		What determines the effectiveness of national PA networks?	Consensus	What determines the effectiveness of national PA networks?	Payal Shah et al	2021	https://doi.org/10.1088/1748-9326/ac05ed	Yes	Effectiveness of national PA networks established between 2000 and 2012 globally in avoiding forest loss, taking into account underlying deforestation threats using a combination of matching methods and cross-sectional regressions	Global	Other: Global	Other: Global		Mali;Mozambique;Nigeria;Sierra Leone;South Sudan;United Republic of Tanzania;Uganda;Zimbabwe;Cameroon;Morocco;Democratic Republic of the Congo;Equatorial Guinea;South Africa;Japan;South Korea;Bangladesh;Cambodia;Timor-Leste;India;Mongolia;Myanmar;Nepal;Vietnam;Armenia;Bhutan;China;Indonesia;Iran;Philippines;Sri Lanka;Thailand;Russia;Austria;Czechia;Estonia;France;Germany;Greece;Ireland;Italy;Norw…	Other: Multiple	Terrestrial	Forest	81 countires	CI (Matching)	Here we determine the success of PAs by country and by strictness of protection relative to the counterfactual, accounting for the degree to which they are placed in areas under threat	No				2000	2012		No		Control	Yes	Matching	Not mentioned		Selected		Remote sensing	Remote sensing	Deforestation	Avoided forest loss	Regression trees	Demographic, agricultural, economic, and governance. Covariates in the matching process: forest cover in 2000, slope, spatially weighted slope of neighboring cells, elevation, spatially weighted elevation of neighboring cells, distance to the nearest city with a population larger than 750 000 within the country, distance to the nearest city with a population larger than 750 000, and length of the…
225	Tapia-Armijos 2017	Spatio-temporal analysis of the human footprint in South Ecuador: Influence of human pressure on ecosystems and effectiveness of PAs	Consensus	Spatio-temporal analysis of the human footprint in South Ecuador: Influence of human pressure on ecosystems and effectiveness of PAs	MarÌ?a Fernanda Tapia-Armijos et al	2016	http://dx.doi.org/10.1016/j.apgeog.2016.10.007	Yes	Tailored the Human Footprint index (HF) developed at global level to evaluate the spatial and temporal patterns of human pressure in South Ecuador for 1982, 1990 and 2008. Land-scape and ecosystem levels were analyzed to identify the contribution of different human proxies to theHF. We also used the HF to evaluate the effectiveness of PAs to reduce human pressure in thesurrounding landscap	Regional	South America	South America	Provinces of Loja and Zamora Chinchipe - South Ecuador	Other: Ecuador		Terrestrial	Multiple	Dry forest, premontane evergreen forest, montane evergreen forest, paramo, shrubland	CI		Yes		1982		1990	2008		No		Control	Yes	Similar area	Not mentioned		Selected		HFI	RS - Threat indices	HFI	Human pressure change	Single mean change rate	Population density, land transformation, human access, electrical power infrastructure
223		Human transformation of ecosystems: Comparing protected and unPAs with natural baselines	Consensus	Human transformation of ecosystems: Comparing protected and unPAs with natural baselines	David VackÌÁr et al	2016		Yes	we apply aggregate indicators of anthropogenic pressures on ecosystems and biodiversity in a fine-scale spatial analysis to compare the level of human influence within protected and unPAs. Maintaining the naturalness of ecosystems through landscape protection.	National	Europe	Europe	Czech Republic	Other: Czechia		Terrestrial			CI		No				2005 - 2010		Composed dataset	No		Other: Outside	No		Not mentioned		Selected		Remote sensing	Remote sensing	LULCC	Land use intensity (HANPP) human appropriation of net primary production	Aggregate indicators of anthropogenic influence	Creating datasets of spatial distribution of HANPP as an indicator for land use intensity, MSA as a measure of biodiversity loss, and NCS as a measure of climate regulation atthe national level in the Czech Republic
218	Wang 2021	Spatial-temporal pattern analysis of landscape ecological risk assessment based on land use/land cover change in Baishuijiang National nature reserve in Gansu Province, China	Consensus	Spatial-temporal pattern analysis of landscape ecological risk assessment based on land use/land cover change in Baishuijiang National nature reserve in Gansu Province, China	Hong Wang et al	2021	https://doi.org/10.1016/j.ecolind.2021.107454	Yes	Evaluated the landscape ecological risk based on LULC changes in Baishuijiang National Nature Reserve according to different management zones from 1986 to 2015.	Local	Asia	Asia	Southern of Gansu Province	China		Terrestrial			CI		Yes				1986	2015	30	Yes	three management zones, which are, core zone (917.8 km2), buffer zone (278.5 km2 ), and experimental zone	Same PAs (Different gradients)	No		Yes	The overall accuracy of LULC classification was 86.37%, 85.50%, 85.70%, and 85.73% for 1986, 1995, 2008, and 2015, respectively, which could meet the requirements of landscape research generally.	Selected		Remote sensing	Remote sensing	LULCC	Area	Landscape ecological risk assessment based on LULC changes, spatial autocorrelation analysis
213	Wu 2022	Changes in habitat quality of nature reserves in depopulating areas due to anthropogenic pressure: Evidence from Northeast China, 2000-2018	Consensus	Changes in habitat quality of nature reserves in depopulating areas due to anthropogenic pressure: Evidence from Northeast China, 2000‰ÛÒ2018	Hui Wu et al	2022	https://doi.org/10.1016/j.ecolind.2022.108844	Yes	How does anthropogenic pressure change within nature reserves in these areas experiencing decreasing human population trends. Map Antropogenic pressure in Northeast China in 2000 and 2018 and determine its spatial and temporal characteristics; evaluate NRs‰Ûª effectiveness using a PSM method and classify NRs in Northeast China	Regional	Asia	Asia	Northeast China - Heilongjiang, Jilin, and Liaonå?ing provinces	China		Terrestrial	Mountains and plains		CI (Matching)		Yes				2000	2018		No		Buffer	Yes	Matching	Not mentioned		Selected		HFI	RS - Threat indices	Anthropogenic pressure		Propensity score matching	Land use intensity, electricity infrastructure, population density electricity infrastructure, roads and railways. Habitat quality assessment: fractional vegetation cover, net primary production, vegetation aggregation index. PSM: 1) elevation, 2) slope, 3) precipitation, 4) temperature, 5) distance to road, 6) land use, 7) soil type, 8) GDP, 9) initial AP in 2000, 10) initial NPP in 2000, and 11…
209	Xu 2022	Have China's national forest reserves designated since 1990 conserved forests effectively?	Consensus	Have China's national forest reserves designated since 1990 conserved forests effectively?	Yu Xu et al	2022	https://doi.org/10.1016/j.jenvman.2022.114485	Yes	We evaluated the effectiveness of China‰Ûªs national forest reserves designated since 1990 in conserving forests	National	Asia	Asia	China	China		Terrestrial	Forest		CI	By analyzing four forest cover and fragmentation metrics, we compared reserves to their surrounding areas and the influence of designation time and zonation.	Yes				1990	2019		Yes		Control	Yes	Other: Unmatching	Yes		Selected		Remote sensing	Remote sensing	Deforestation	Percentage forest cover, mean forest patch size, mean forest patch radius of gyration, and forest patch cohesion index	Unmatching /GAM
204	Zhang 2013	Sustainability of social-ecological systems under conservation projects: Lessons from a biodiversity hotspot in western China	Consensus	Sustainability of social-ecological systems under conservation projects: Lessons from a biodiversity hotspot in western China	Kerong Zhang et al.	2013	10.1016/j.biocon.2012.08.021	Yes	Study the sustainability of the social‰ÛÒecological systems under conservation projects,i.e., establishment of the Foping National Nature Reserve (FNNP) in 1978 and implementation of the Natural Forest Conservation Program (NFCP) and the ‰Û÷Grain-for-Green‰Ûª Program (GGP) since 2000. We analyzed land use/land cover change using remotely sensed Landsat MSS/TM/ETM imagery obtained in the growing s…	Local	Asia	Asia	Jinshui watershed - Qinling Mountains	China		Terrestrial	Forests	Giant panda habitat	CI	The study utilized remote sensing data to analyze land use/land cover changes and collected information on giant panda populations, socio-economic conditions, and local farmers' attitudes towards conservation projects.	Yes	1978	2000			2007	29	Yes	Implementation of the Natural Forest Conservation Program and Grain-for-Green Program.	Same PAs (Different gradients)	No		Not mentioned		Selected		Remote sensing; Questionaires	Remote sensing	LULCC, giant panda population	Percentage of forest cover, population density, watershed boundary	Land cover classification	Socio-economic conditions, farmer attitudes
201		How good is your marine PA at curbing threats?	Consensus	How good is your marine PA at curbing threats?	Mirta Zupan et al	2018	https://doi.org/10.1016/j.biocon.2018.03.013	Yes	we develop and operationalize a local threat assessment framework. We develop indices to quantify the effectiveness of MPAs (or individual zones within MPAs in the case of multiple-use MPAs) in reducing anthropogenic extractive and non-extractive threats operating at local scale, focusing specifically on threats that can be managed through MPAs	Local	Europe	Europe	Mediterranean Sea	Other: Mediterranean		Marine	Marine		CI		No							Yes		Buffer	No		Not mentioned		Selected		Threat indices	RS - Threat indices	Extractive and non-extractive	Mean threat intensities, threat capacity reduction	Threat reduction index
196	Feng 2022	Improving PA effectiveness through consideration of different human-pressure baselines	Consensus	Improving PA effectiveness through consideration of different human-pressure baselines	Chun-Ting Feng et al	2021	DOI: 10.1111/cobi.13887	Yes	We developed a framework that considers both human-pressure baseline and change in human pressure over time and assessed the effectiveness of 338 PAs in China from 2010 to 2020.	National	Asia	Asia	China	China		Other: Terrestrial and freshwater			CI (Matching)		Yes				2010	2020	10	No		Control	Yes	Matching	Yes	To verify the validity of PSM, we used the standardized differences test to check the balance between the treated sites and the control sites in each individual PA	Selected		Remote sensing	RS - Threat indices	Human Pressure Index	HPI	Matching	Land-cover data, Human population density, Control variables in propensity score matching (PSM):Elevation, slope, distance to the nearest road, distance to the nearest settlement, and soil type.
195	AkodÌ©wou 2020	Land Use and Land Cover Dynamics Analysis of the Togodo PA and Its Surroundings in Southeastern Togo, West Africa	Consensus	Land Use and Land Cover Dynamics Analysis of the Togodo PA and Its Surroundings in Southeastern Togo, West Africa	Amah AkodÌ©wou et al	2020	doi:10.3390/su12135439	No	This study analysed historical LULC changes over a temporal extent of 42 years (1974‰ÛÒ2016) in the Togodo PA and its surroundings, in Togo, by associating intensity and trajectory analyses	Local	Africa	Africa	Southeastern Togo (West Africa)	Other: Togo		Terrestrial	Tropical forests and savannahs		CI		Yes	1974	1986		2013	2016		No		Other: Outside	No		No	Accurate training and validation datasets for each class were obtained by digitizing training class polygons based on the interpretation of pre-existing vegetation maps	Selected		Remote sensing	Remote sensing	LULCC	Cover changes	Supervised Support Vector Machines (SVM) classifier, contingency tables for the land use intensity analysis.	ULC types from 1 to 5: 1‰ÛÓForest, 2‰ÛÓSavannah, 3‰ÛÓCropland, 4‰ÛÓBuilt or bare area, and 5‰ÛÓWater, climate
187	Ren 2021	An invasive species erodes the performance of coastal wetland PAs	Consensus	An invasive species erodes the performance of coastal wetland PAs	Junlin Ren et al	2021	DOI: 10.1126/sciadv.abi894	Yes	We assess the large-scale, long-term impact of plant invasions on the performance of China‰Ûªs major PAs across the Yellow Sea in conserving internationally renowned coastal wetlands, including four World Natural Heritage and/or Wetlands of International Importance sites	Regional	Asia	Asia	Yellow Sea	China		Marine	Coastal wetlands		BACI	Constructed a long-term dataset of mudflats native marshes, exotic cordgrass marshes, and reclaimed lands in seven of the largest coastal PAs (see table S1 for a summary of basic information) and matched non-PA controls in China, using Landsat images and a rigorously validated classification algorithm implemented on Google Earth Engine	Yes				1985	2015		Yes	Involves BA PA creation	Control	Yes	Matching	Yes		Selected		Remote sensing	Remote sensing	Land reclamation and IAS	Extents of cordgrass invasion and reclamation as a percentage of the total wetland area	Common-centroid matching, statistical matching, and propensity score matching	Human population density, road density, distance to shoreline, distance to river, percent land cover, and NDVI
185	Clark 2013	PAs in South Asia have not prevented habitat loss: a study using historical models of land-use change	Consensus	PAs in South Asia Have Not Prevented Habitat Loss: A Study Using Historical Models of Land-Use Change	Natalie E. Clark, Elizabeth H. Boakes, Philip J. K. McGowan, Georgina M. Mace, Richard A. Fuller	2013	doi:10.1371/journal.pone.0065298	Yes	Compare coverage by anthropogenic land uses inside and outside South Asia‰Ûªs PA network, and measure the rates of habitat conversion over the last century both inside and outside the network.	Regional	Asia	Asia	South Asia	India;Nepal;Bhutan;Bangladesh;Pakistan;Sri Lanka	Multiple: Asia	Terrestrial	NA	Countries: India;Nepal;Bhutan;Bangladesh;Pakistan;Sri Lanka	BACI	Compare-to-everywhere approach in which we contrast (i) the extent of intact habitat inside PAs with the entire unprotected landscape	Yes		1850	2000	1999	2000	121 years	Yes	Before - After PA creation	Control	No		Not mentioned	NA	Selected	NA	LULCC	Remote sensing	Habitat modified by humans both inside and outside the PA network	Percentage of habitat-modified	Historical sequence of habitat conversion
180	Bowker 2017	Effectiveness of Africa's tropical PAs for maintaining forest cover	Consensus	Effectiveness of Africa's tropical PAs for maintaining forest cover	J. N. Bowker et al	2016	DOI: 10.1111/cobi.1285	Yes	We used matching methods to assess the effectiveness of Africa‰Ûªs parks across the entire Tropical and Subtropical Moist Broadleaf Forest biome from 2000 to 2013. To determine whether tropical African parks are effectively curbing deforestation	Continental	Africa	Africa	23 African countries	Burundi;Cameroon;Central African Republic;Ivory Coast;Democratic Republic of the Congo;Equatorial Guinea;Ethiopia;Gabon;Ghana;Liberia;Madagascar;Mozambique;Nigeria;Sierra Leone;South Africa;United Republic of Tanzania;Togo;Uganda	Other: Multiple: Africa	Terrestrial	Tropical and Subtropical Moist Broadleaf Forest biome		CI (Matching)	We assessed individual- and national-park effectiveness by comparing forest loss at sample points inside parks with forest loss at matched unprotected sample points outside parks with logistic regression (general linear mixed model with logit-link function).	Yes				2000	2013	13 years	No	NA	Control	Yes	Matching	Not mentioned	NA	Selected	NA	Comparison of forest loss inside parks to matched unprotected control sites	Remote sensing	Forest loss	Extent of forest loss	Logistic regression	Distance to major cities, distance to major roads, annual precipitation, elevation, and slope
179	Giakoumi 2019	Exploring the relationships between marine PAs and invasive fish in the world's most invaded sea	Consensus	Exploring the relationships between marine PAs and invasive fish in the world's most invaded sea	Sylvaine Giakoumi	2018	https://doi.org/10.1002/eap.1809	Yes	We explored the relationships between MPAs and alien/native range-expanding fishes in the Mediterranean Sea, the world's most invaded sea. (3) examine whether protection potentially affects the populations of these fishes.	Regional	Europe	Europe	South and Eastern Mediterranean MPAs	Spain;France;Italy;Croatia;Greece;Turkey	Other: Multiple	Marine	Rocky habitats	Spain, France, Italy, Croatia, Greece, and Turkey	CI		No				2016		4 months	No		Other: Outside	No		Not mentioned		Selected		Field survey	Field sampling/Interviews	Invasive species		PERMANOVA	Abundance and size of fishes, density and biomass of key herbivore invertebrates, physical habitat structural complexity, Sea surface temperature
177	Beresford 2018	Correlates of long-term land-cover change and PA performance at priority conservation sites in Africa	Consensus	Correlates of long-term land-cover change and PA performance at priority conservation sites in Africa	Alison E. Beresford et al	2017	doi:10.1017/S0376892917000157	No	We use visual assessment of satellite images to quantify land-cover change over periods of up to 30 years in and around a matched sample of protected and unprotected Important Bird and Biodiversity Areas (IBAs) in Africa.	Continental	Africa	Africa	Africa	Other: Multiple	Other: Multiple: Africa	Terrestrial			CI (Matching)		No				1981	2009	30	No		Control	Yes	Matching	Yes		Selected		Remote sensing	Remote sensing	LULCC	Annual survival of forests and other natural land cover	GLMMs	We matched sites on the basis of area, mean altitude, mean distance from roads mean human population density and the most extensive GLC2000 land-cover class in the IBA. Market accessibility, Agricultural suitability, cropland cover, biome
175	Potapov 2017	The last frontiers of wilderness: Tracking loss of intact forest landscapes from 2000 to 2013	Consensus	The last frontiers of wilderness: Tracking loss of intact forest landscapes from 2000 to 2013	Peter Potapov et al.	2017		No	Map the global extent of intact forest landscapes (IFLs) in the years 2000 and 2013, to locate changes due to alteration and fragmentation, and to identify causes of change	Global	Other: Global	Other: Global	Multiple	Global	Other: Multiple	Terrestrial	Forests	Countries: 65	CI (Matching)		No				2000	2013	13	No		Control	Yes	Matching	Yes	Tested accuracy of the IFL 2000‰ÛÒ2013 change map	Selected		Remote sensing	Remote sensing	Deforestation	Reduction of IFL	Stratified sampling	Elevation, slope, distance to IFL boundary, tree canopy cover for the year 2000, and the human footprint index
170	Mwangi 2010	Tracking trends in key sites for biodiversity: a case study using Important Bird Areas in Kenya	Consensus	Tracking trends in key sites for biodiversity: a case study using Important Bird Areas in Kenya	M. A. KIRAGU MWANGI et al	2010	doi:10.1017/S0959270910000456	No		National	Africa	Africa		Other: Kenya		Terrestrial	Eastern Arc forest (six IBAs), highland forest (five), moist evergreen forest (two), highland grassland (four), savannah grassland (seven), moist grassland (one), wetland (eight), papyrus swamp (two) and montane shrubland		CI		No		1999		2004	2005		No		Other: Outside	No		Not mentioned		Excluded		BirdLife IBA monitoring framework	Remote sensing	IBA indices	IBA indices for state, pressure and response	Multiple regression models
169	Geldmann 2014	Mapping change in human pressure globally on land and within PAs	Consensus	Mapping Change in Human Pressure Globally on Land and within PAs	Geldmann, J., et al.	2014	DOI: 10.1111/cobi.12332	No	How the THPI within PAs was correlated to IUCN management categories and the human development index (HDI) and how the THPI was correlated to cumulative pressure on the basis of the original human footprint index.	Global	Other: Global	Other: Global	NA	Other: Global		Terrestrial	NA	Countries: 107	CI	NA	Yes	NA	NA	NA	1990	2010	20	Yes	IUCN categories	None	No		Not mentioned	NA	Selected	NA	Remote sensing	RS - Threat indices	Temporal human pressure index (THFI)	Average THPI	Linear regression	We used an analysis of covariance (ANCOVA) to test the effectiveness of PAs at mitigating change in pressure as a function of PA size, PA age, mean slope of the PA, mean elevation of the PA, country level HDI, and IUCN management category
162	White 2020	Tracking the response of industrial fishing fleets to large marine PAs in the Pacific Ocean	Consensus	Tracking the response of industrial fishing fleets to large marine PAs in the Pacific Ocean	Timothy D. White	2020	DOI: 10.1111/cobi.13584	Yes	developed vessel tracking data set (produced using Automatic Identification System detections) to quantify the response of industrial fishing fleets to 5 of the largest MPAs established in the Pacific Ocean since 2013	Regional	Other: Pacific Ocean	Other: Pacific Ocean	Pacific Ocean	Chile; United States of America;United Kingdom;Kiribati	Other: Multiple	Marine	Marine	Countries: Chile, USA, UK, Kiribati	BA	Vessel tracking to generate views of industrial fishing before and after fishing restrictions were implemented in 5 of the largest MPAs in the Pacific Ocean	Yes		2013					Yes	We created maps of annual fishing effort for 1 year before and 1 year after fishing restrictions took effect	Other: Outside	No		Yes		Selected		Remote sensing	Remote sensing	Industrial fishing effort	Vessel tracking	Annual fishing effort for 1 year before and 1 year after fishing restrictions took effect	Fshing activity in nearby EEZs that permit industrial fishing, fishing effort near large MPAs that fit 4 criteria: no-take MPA, MPAs in national waters; and MPAs implemented from 1 January 2013 to 1 January 2017
157	Maiorano 2008	Size-dependent resistance of PAs to land-use change	Consensus	Size-dependent resistance of PAs to land-use change	Luigi Maiorano et al.	2008	10.1098/rspb.2007.1756	Yes	Efficacy of PAs at halting (or at least reducing) habitat degradation in a human-dominated landscape. Our study area is Italy and our hypothesis is that there is a relationship between the size of PAs and their resistance to land-use change, with smaller areas being influenced by the surrounding environment more extensively than larger areas.	National	Europe	Europe		Other: Italy		Terrestrial			CI	Measured land-cover/land-use change from 1990 to 2000 using CORINE land cover maps and a detailed dataset on PAs in Italy. It compared land-use/land-cover changes inside PAs and surrounding buffers, and analyzed the relationship between PA size and their efficacy in slowing down or stopping land-use/land-cover change	Yes				1990	2000	10	No		Buffer	No		Not mentioned		Selected		Remote sensing	Remote sensing	LULCC	Rate of change in LULCC	Non-parametric statistics, Mann‰ÛÒWhitney U-test, Kruskal‰ÛÒWallis one-way analysis of variance, Spearman rank correlation analysis	PA size, buffer size
153	Graham 2021	Southeast Asian PAs are effective in conserving forest cover and forest carbon stocks compared to unPAs	Consensus	Southeast Asian PAs are effective in conserving forest cover and forest carbon stocks compared to unPAs	Victoria Graham et al	2021	https://doi.org/10.1038/s41598-021-03188-w	Yes	to estimate their effectiveness in conserving forest cover and forest carbon stocks for 2000‰ÛÒ2018, we used statistical matching methods to control for the non-random location of PAs, to compare protection against a matched counterfactual.	Regional	Asia	Asia	Southeast Asia	Cambodia; Indonesia; Laos;Malaysia; Myanmar;Philippines; Thailand; Vietnam	Other: Multiple: Southeast Asia	Terrestrial		Cambodia, Indonesia, Laos, Malaysia, Myanmar, the Philippines, Thailand, and Vietnam	CI (Matching)	Matching	Yes				2000	2018	19	Yes	Reported MEET	Control	Yes	Matching	Yes		Selected		Remote sensing	Remote sensing	Deforestation	Avoided forest cover loss	Propensity Score Matching	Anthropogenic drivers (human population density, presence of roads and railways, pressure to expand croplands and urban environments), suitability for land conversion (elevation, slope, and agricultural suitability), and biological aspects (peat characteristics and forest cover
148	Stocks 2007	Indigenous, colonist, and government Impacts on Nicaragua's Bosawas Reserve	Consensus	Indigenous, Colonist, and Government Impacts on Nicaragua‰Ûªs Bosawas Reserve	ANTHONY STOCKS et al	2007	DOI: 10.1111/j.1523-1739.2007.00793.x	No	We studied the impacts of colonists, two groups of indigenous residents (Miskitu and Mayangna), and management by the Nicaraguan Ministry of Environment and Natural Resources (MARENA) on the forest of the Bosawas International Biosphere Reserve	Local	South America	South America	North-central Nicaragua	Other: Nicaragua		Terrestrial	Subtropical rainforest		CI		Yes		1987	1995 - 1996	2001	2002		Yes	Impact of indigenous and colonist residents	Buffer	No		Not mentioned		Selected		Remote sensing	Remote sensing	LULCC	normalized burn ratio (NBR)	Land cover comparisons
147	Zhang 2021	Landscape Fragmentation in Qinling-Daba Mountains Nature Reserves and Its Influencing Factors	Consensus	Landscape Fragmentation in Qinling‰ÛÒDaba Mountains Nature Reserves and Its Influencing Factors	Yingzhuo Zhang et al.	2021	10.3390/land10111124	No	Investigating landscape fragmentation and its effects on habitat status based on land cover	Regional	Asia	Asia	Qinling‰ÛÒDaba Mountains	China		Terrestrial	Forests	Warm‰ÛÒtemperate deciduous broadleaved forests, evergreen‰ÛÒdeciduous, broadleaved mixed forests	CI	Analyzed landscape fragmentation characteristics and the driving factors for the interior and peripheries of the Qinling‰ÛÒDaba Mountains nature reserves during 2010‰ÛÒ2017	Yes				2010	2017	7	No		Buffer	No		Not mentioned		Selected		LULCC	Remote sensing	Landscape fragmentation	Landscape metrics	Spatial principal component analysis, Geodetector	Human activity intensity, land-use degree, elevation, slope gradient, topographic relief
132	Tan 2022	The Sanjiangyuan Nature Reserve Is Partially Effective in Mitigating Human Pressures	Consensus	The Sanjiangyuan Nature Reserve Is Partially Effective in Mitigating Human Pressures	Linyi Tan et al	2022	https://doi.org/10.3390/land11010043	Yes	We developed a HF dataset for the Sanjiangyuan region in China after localizing the global HF model. Then we used it to assess the effectiveness of Sanjiangyuan nature reserve (SNR) in mitigating human pressures	Local	Asia	Asia	Sanjiangyuan region	China		Terrestrial			BACI	Compares within and outside buffer areas (BACI) and considers the implementation of management BA	Yes	2005	1995	2005		2015		Yes	Effective management since 2005	Same PAs (Different gradients)	No		Yes		Selected		HFI	RS - Threat indices	HFI	Changes in HFI		Population density, grazing intensity, land use intensity, roads, and nighttime lights
128	Gavioli 2023	Effectiveness of the Natura 2000 network for freshwater fish conservation in a Mediterranean region	Consensus	Effectiveness of the Natura 2000 network for freshwater fish conservation in a Mediterranean region	Anna Gavioli et al	2023	DOI 10.3389/fenvs.2023.1122464	Yes	We tested the hypothesis that fish community is exposed to less anthropogenic pressures within the Natura 2000 sites than outside, hosting a higher number of native species and maintain lower number of non-native species	National	Europe	Europe	Mediterranean	Other: Italy		Freshwater	Freshwater watercourses		CI		No							No		Buffer	No		Not mentioned		Selected		Field sampling	RS - Threat indices	HFI	HFI	Kruskal-Wallis test	Species richness, geographical, climate and anthropogenic landscape factors, intensity of animal farming, total urbanized area
125	Neil 2021	Illegal settlement in the Babile Elephant Sanctuary is threatening the resident elephant population	Consensus	Illegal settlement in the Babile Elephant Sanctuary is threatening the resident elephant population	EMILY NEIL and ELIZABETH GREENGRASS	2020		Yes	Mapping was undertaken to analyse the rate of human immigration into the Sanctuary in2006, 2014, 2017 as part of an assessment of the Sanctuary‰Ûªs effectiveness in protecting its resident elephant population and in mitigating anthropogenic pressures	Local	Africa	Africa		Other: Ethiopia		Terrestrial			CI		Yes				2006	2017		No		Other: Outside	No		Not mentioned		Selected		Remote sensing	Remote sensing		Number of houses
117	Shah 2015	Evaluating heterogeneous conservation effects of forest protection in Indonesia	Consensus	Evaluating Heterogeneous Conservation Effects of Forest Protection in Indonesia	Payal Shah, Kathy Baylis	2015	doi:10.1371/journal.pone.0124872	Yes	Effectiveness of seven Indonesian forest PAs introduced between 1999 and 2012	National	Asia	Asia	Sumatra, Java, Sulawesi and Papua	Other: Indonesia		Terrestrial			CI (Matching)	We use a difference-in-differences approach comparing treated observations and matched controls to estimate the effect of each PA. We then distinguish the true variation in PA effectiveness from spurious variation driven by several sources of estimation bias	No				1999	2012		No		Control	Yes	Matching	Not mentioned		Selected		Primary forest cover	Remote sensing	Deforestation	% change in forest cover	OLS regressions	slope, elevation, distance to roads, distance to rivers, distance to cities, peat depth, and administrative boundaries for all treated and eligible control parcels
113	Carmenta 2016	Does the Establishment of Sustainable Use Reserves Affect Fire Management in the Humid Tropics?	Consensus	Does the Establishment of Sustainable Use Reserves Affect Fire Management in the Humid Tropics?	Rachel Carmenta et al	2016	DOI:10.1371/journal.pone.0149292	Yes	Policy performance of SUR creation on fire use and management by evaluating fire-activity in 49 SURs in the Brazilian Amazon, compared to the wider landscape surrounding the reserve (a control buffer area of 10km) and apply a preprotection baseline	Regional	South America	South America	Brazilian Amazon	Brazil		Terrestrial	Tropical rainforest		BACI		Yes	2004 - 2006	2001			2009	01.01.2001‰ÛÒ31.12.2009	Yes	PA creation	Control	No		Not mentioned		Selected	NA	Remote sensing	Remote sensing	Hot pixels			TRMM rainfall data, Terra-Class land cover data, socio-ecological and spatial extent of rivers and roads
112	Zbierska 2022	Landscape Changes in PAs in Poland	Consensus	Landscape Changes in PAs in Poland	Anna Zbierska	2022	https://doi.org/10.3390/su14020753	No	Analyze the changes in land use between 2000 and 2018, in various types of nature protection areas listed in the Polish Central Register of the Forms of Nature Protection and the European Natura 2000 network within the country. The processes that have occurred inside the different types of PAs forms were compared with those that have occurred outside of them (nPA), in their surroundings	National	Europe	Europe	Poland	Other: Poland		Terrestrial	Various (forests, grasslands, wetlands, etc.)		CI	Analyzed land use/land cover changes in Polish PAs between 2000-2018 using Corine Land Cover data. Compares inside with buffer	Yes				2000	2018	18	No		Buffer	No		Not mentioned		Selected		Remote sensing	Remote sensing	LULCC	LULCC area	Transition matrix analysis of land cover changes	urbanization (LCF1), intensification of agriculture (LCF2), extensification of agriculture (LCF3), afforestation (LCF4), deforestation (LCF5), formation of water bodies (LCF6), and naturalization or land reclamation (LCF7
105	Dehmel 2022	Relating Country-Level Governance and Tree Cover Loss in Sub-Saharan African PAs: Identifying Knowledge Gaps and a More Nuanced Perspective	Consensus	Relating Country-Level Governance and Tree Cover Loss in Sub-Saharan African PAs: Identifying Knowledge Gaps and a More Nuanced Perspective	Dehmel N., et al	2022	doi: 10.3389/ffgc.2022.807214	No	Exploratory analysis of the relationship between the quality of country-level governance and trends in tree cover loss within sub-Saharan African PAs	Continental	Africa	Africa	Sub-Saharan Africa	Angola;Benin;Burundi;Cameroon;Central African Republic;Comoros;Democratic Republic of the Congo;Ivory Coast;Equatorial Guinea;eSwatini;Ethiopia;Gabon;Ghana;Guinea;Guinea-Bissau; Kenya;Liberia; Madagascar;Malawi;Mauritius;Mozambique;Nigeria;Rwanda;São Tomé and Principe; Seychelles;Sierra Leone;South Africa;South Sudan;United Republic of Tanzania;Togo; Uganda;Zambia	Other: Multiple: Africa	Terrestrial	Multiple	33 sub-Saharan African countries	CI	We correlated annual governance scores from the Ibrahim Index of African Governance (IIAG) with the annual rate of tree cover loss in the total terrestrial area of PAs in 33 forested sub-Saharan African countries	No	NA	NA	NA	2008	2017	10	Yes	Comparison of governance	None	NA		Not mentioned	NA	Selected	NA	Remote sensing	Remote sensing	Tree cover loss	Annual percentage rates of tree cover loss	Linear regression	Ibrahim Index of African Governance, World Development Indicators database
102	Brink 2016	Indicators for Assessing Habitat Values and Pressures for PAs-An Integrated Habitat and Land Cover Change Approach for the Udzungwa Mountains National Park in United Republic of Tanzania	Consensus	Indicators for Assessing Habitat Values and Pressures for PAs‰ÛÓAn Integrated Habitat and Land Cover Change Approach for the Udzungwa Mountains National Park in United Republic of Tanzania	Andreas B. Brink, Javier MartÌ?nez-LÌ?pez, Zoltan Szantoi, Pablo Moreno-Atencia, Andrea Lupi, Lucy Bastin and GrÌ©goire Dubois	2016	https://doi.org/10.3390/rs8100862	No	Assesses the LULCC over a 20 year (1990‰ÛÒ2000‰ÛÒ2010) using Landsat imagery for the Udzungwa Mountains National Park (UMNP) and its surroundings (20 km buffer) in United Republic of Tanzania	Local	Africa	Africa	Udzungwa Mountains	Other: United Republic of Tanzania		Terrestrial	Tropical and subtropical moist broadleaf forests, tropical and subtropical grassland, savanna and shrubland	The UMNP has a size of 1990 km2 and is within the Udzungwa Mountains (>12,000 km2), which are part of the Eastern Arc.	CI		Yes				1990	2010	20 years	No		Buffer	No		Not mentioned		Selected	NA	Remote sensing, LULC assessment	Remote sensing	LULCC	Percentage and area (km2)	NA	Infrastructures such as railroads, roads and settlements
98	Schmitz 2023	Assessing the role of PAs in the land-use change dynamics of a biodiversity hotspot	Consensus	Assessing the role of PAs in the land-use change dynamics of a biodiversity hotspot	Marcelo Henrique Schmit et al	2023	https://doi.org/10.1007/s13280-023-01886-5	Yes	Evaluated whether the establishment of PAs in the Upper Paranaå« River floodplain region could reduce anthropic landscape changes and whether there is a difference in protection when using different PA restriction categories	Regional	South America	South America	Upper Paranaå« River floodplain	Brazil		Terrestrial	Floodplains and riparian forests	Transition between Atlantic forest and the Cerrado	BACI	The general land-use dynamics were analyzed considering the years before and after the creation of the PAs with different degrees of protection	Yes	1998	1989	1998	1999 - 2008, 2009	2018	30	Yes	BA the creation of the PAs with different degrees of protection	PAs different categories	No		No	Not mentioned	Selected		Remote sensing	Remote sensing	LULCC	Total amount of land-use transition (net gains and losses)	Intensity analysis
96	Lawrence 2021	Landscape fragmentation of the Natura 2000 network and its surrounding areas	Consensus	Landscape fragmentation of the Natura 2000 network and its surrounding areas	Alexandra LawrenceI et al	2021	https://doi.org/10.1371/journal.pone.0258615	No	we investigate anthropogenic fragmentation inside and around N2k sites across the EU. We define fragmentation as a landscape-scale process that includes (a) reduction in total habitat area, (b) increase in the number of habitat patches, and (c) decrease in sizes of habitat patches	Continental	Europe	Europe	EU	United Kingdom;Ireland;Portugal;Spain;France;Belgium;Netherlands;Luxembourg;Germany;Denmark;Norway;Sweden;Finland;Estonia;Latvia;Lithuania;Poland;Czechia;Slovakia;Austria;Switzerland;Italy;Slovenia;Hungary;Croatia;Bosnia and Herzegovina;Serbia;Montenegro;Albania;Greece;Romania;Bulgaria;Ukraine;Moldova;Belarus;Russia;Turkey	Other: Multiple: Europe	Terrestrial	EU biomes		CI		No				2012			No		Buffer	No		Not mentioned		Selected		LULCC	Remote sensing	Habitat fragmentation	Effective mesh density	Cross-boundary connections	Major and medium anthropogenic constructions‰ÛÒsuch as roads, railways, and buildings
94	Mancini 2005	Biological quality of running waters in PAs: the influence of size and land use	Consensus	Biological quality of running waters in PAs: the influence of size and land use	Laura Mancini et al	2005		Yes	the size and land use of 19 PAs of Latium Region (central Italy) were related to the biological quality of 32 streams running inside them. Additionally, the biological quality of 18 out of the 32 streams was compared with the quality recorded on the same streams outside the boundaries of the PAs	Regional	Europe	Europe	Latium Region	Other: Italy		Freshwater	Streams		CI	IBE values recorded in 18 out of the 19 study streams were compared with the IBE values obtained on the same streams outside the boundaries of the PA (control sites)	No				2002			No		Buffer	No		No		Selected		Remote sensing and Field sampling	Remote sensing	Macroinvertebrate community health	Extended Biotic Index	Wilconox test	Land use data
92	Kindermann 2023	Combining historical aerial photography with machine learning to map landscape change impacts on dry grasslands in the Central Alps	Consensus	Combining historical aerial photography with machine learning to map landscape change impacts on dry grasslands in the Central Alps	Elisabeth Kinderman et al	2023	https://doi.org/10.1007/s10980-023-01684-0	No	assess changes in grassland vegetation and their current extent in Val Venosta (European Alps, Italy) in relation to overall landscape settings, anthropogenic drivers of change and the effectiveness of the PAs.	Local	Europe	Europe	Val Venosta (European Alps, Italy)	Other: Italy		Terrestrial	Dry grasslands		CI		No				1945	2015	70	No		Other: Outside	No	Other:	Yes		Selected		Aerial photograph	Remote sensing	LULCC	Landscape changes	Random forest	Built-up, agriculture, grasslands, shrubs, forest, water
89	Medeiros 2023	Effectiveness of Federal PAs in the Preservation of Mangrove Forests on the Coast of the State of Paraiba, Brazil	Consensus	Effectiveness of Federal PAs in the Preservation of Mangrove Forests on the Coast of the State of ParaÌ?ba, Brazil	Iara S. Medeiros et al	2023	DOI 10.1590/0001-3765202320211079	Yes	effectiveness of Federal PAs on the coast of the state of ParaÌ?ba in northeastern Brazil with regard to the preservation of mangrove forests	Local	South America	South America	State of ParaÌ?ba	Brazil		Other: Coastal	Mangroves		BA	RS images taken 1 or 2 years before PA establishment and until 2016 (Table 1)	Yes	1985, 1993, 2004, 2007	1984, 1991, 2003, 2005		1995 (AREI) , 2005 (AREI, EPA)	2016	Depends on each PA (Min 11 max 32)	Yes	BA PA creation	None	NA		Not mentioned		Selected		Remote sensing	Remote sensing	Deforestation	Mangrove cover	Spatiotemporal analysis	Socioeconomic activities
86	Li 2022	Effectiveness of the Qilian Mountain Nature Reserve of China in Reducing Human Impacts	Consensus	Effectiveness of the Qilian Mountain Nature Reserve of China in Reducing Human Impacts	Shicheng Li et al	2022	https://doi.org/10.3390/land11071071	Yes	We evaluated the effectiveness of Qilian Mountain Nature Reserve (QMNR) in reducing human footprint (HF)	Local	Asia	Asia	Northeastern edge of the Qinghai‰ÛÒTibet plateau	China		Terrestrial			CI	Comparisons of the HF value between inside and outside QMNR and its four functional zones were conducted.	Yes	1990	1980	1990	2010	2020	40	No		Other: Outside	No		Not mentioned		Selected		Remote sensing	RS - Threat indices	HFI		HFI	Four dominant human activity factors, including population density, land use, road distribution, and night light, were incorporated for HF mapping
83	Adeney 2009	Reserves protect against deforestation fires in the Amazon	Consensus	Reserves Protect against Deforestation Fires in the Amazon	Adeney JM, Christensen NL Jr, Pimm SL	2009	doi:10.1371/journal.pone.0005014	Yes	(1) Do reserves actually protect Amazonian forests from deforestation and fires? (2) Is protection de facto, a consequence of reserve location (in remote places, for example), or de jure, because legal protections are respected? (3) Are some reserve types more effective than others in preventing deforestation fires	Regional	South America	South America	Brazilian Amazon	Brazil		Terrestrial	Tropical rainforest		CI	Reserves and unPAs by examining satellite-detected hot pixels regressed against road distance across the entire Brazilian Amazon and for a decade with 2 El Nino-related droughts.	Yes				1996	2006	10 years	No	NA	Other land uses	No		Yes	To confirm the general pattern of our results, we also analyzed 3-year data sets released by the Large-Scale Biosphere-Atmosphere Experiment (LBA) in Amazonia	Selected	NA	Remote sensing	Remote sensing	Fire	Hot pixel frequency	Analysis of covariance to assess patterns of hot pixel frequency in different reserve types, land designations (inside and outside reserves, high- and low-impact areas)	Distance to roads, rainfall and droughts (ENSO)
82	Giliba 2022	Multiple anthropogenic pressures challenge the effectiveness of PAs in western United Republic of Tanzania	Consensus	Multiple anthropogenic pressures challenge the effectiveness of PAs in western United Republic of Tanzania	Richard A. Giliba et al	2022	https://doi.org/10.1111/csp2.12684	Yes	To assess the ecological effectiveness of PAs in the Katavi-Rukwa Ecosystem (KRE) in western United Republic of Tanzania, we investigated temporal changes in land-use and population densities of six large mammal target species (elephant, buffalo, giraffe, zebra, topi, and hartebeest) across areas with different conservation category, ranging from unprotected to strictly protected	Regional	Africa	Africa	Western United Republic of Tanzania	Other: United Republic of Tanzania		Terrestrial	Katavi-Rukwa Ecosystem		CI		Yes				1991	2018		No		Other PAs same categories	No		Yes	Land cover maps validation	Selected		Remote sensing	Remote sensing	LULCC	Cropland cover	Kruskal‰ÛÒWallis test, GLMMs	Large mammal population data, Land cover and environmental variables
81	Eklund 2022	Elevated fires during COVID-19 lockdown and the vulnerability of PAs	Consensus	Elevated fires during COVID-19 lockdown and the vulnerability of PAs	Eklund, J. et al	2022	https://doi.org/10.1038/s41893-022-00884-x	No	We explore whether the cessation of on-site protected-area management activities due to the pandemic were associated with increased burning inside PAs	National	Africa	Africa	Madagascar	Other: Madagascar		Terrestrial	Tropical and subtropical moist broadleaf forests (comprising humid and subhumid forests), tropical and subtropical dry broadleaf forests (comprising dry deciduous forest) and deserts and xeric shrublands	NA	BA	Quasi experimental desing	Yes	2020	2012	2019	2019	2020	8	Yes	COVID-19 management suspension from March to July 2020	None	NA		Not mentioned	NA	Selected	NA	Remote sensing	RS - Threat indices	Fire	Excess fires per km2	Binomial model	Precipitation
80	Karimi 2020	Assessing national human footprint and implications for biodiversity conservation in Iran	Consensus	Assessing national human footprint and implications for biodiversity conservation in Iran	Azadeh Karimi, Kendall Jones	2020	https://doi.org/10.1007/s13280-019-01305-8	Yes	Develop the national-scale human footprint map for Iran, and (2) examine the extent and intensity of human pressure within Iranian PAs, to assess the effectiveness of conservation efforts at mitigating human impacts.	National	Asia	Asia	NA	Other: Iran		Terrestrial	Across biomes and ecoregions	NA	CI	NA	No	NA	NA	NA	NA	NA	NA	No	NA	Other: Outside; PAs different categories	No		Not mentioned	NA	Selected	NA	HFI	RS - Threat indices	NA	Mean human footprint score	NA	(1) human population density; (2) extent of built environments; (3) crop lands; (4) pasture lands; (5) roads; (6) night-time lights; (7) railways; and (8) navigable waterways.
68	Geldmann 2019	A global-level assessment of the effectiveness of PAs at resisting anthropogenic pressures	Consensus	A global-level assessment of the effectiveness of PAs at resisting anthropogenic pressures	J. Geldmann, et al.	2019	https://doi.org/10.5061/dryad.p8cz8w9kf	Yes	PAs ability to reduce human pressure and how this varies with socioeconomic and management circumstance	Global	Other: Global	Other: Global	NA	Other: Global		Terrestrial	Afrotropics, Australasia, Indomalaya, Nearctic, Neotropics, Palearctic	NA	CI (Matching)	To account for the nonrandom location of PAs within countries (18), we used propensity score matching (PSM)	Yes	NA	NA	NA	1995	2010	15	No	NA	Control	Yes	Matching	Not mentioned		Selected	NA	Remote sensing	RS - Threat indices	THPI	Average THPI	Propensity score matching (PSM)	Human population density, density of night-visible infrastructure and the percentage of area under cropland
66	Koju 2021	COVID-19 lockdown frees wildlife to roam but increases poaching threats in Nepal	Consensus	COVID-19 lockdown frees wildlife to roam but increases poaching threats in Nepal	Narayan Prasad Koju et al	2021		No	Impact of the COVID-19 lockdown on wildlife and forests in the PAs (PAs) of Nepal. Between July and September 2020	National	Asia	Asia		Other: Nepal		Terrestrial			BA	Data from the fiscal year 2019‰ÛÒ2020 were analyzed, comparing before lockdown and after	Yes	2020	2019	July 2020	July 2020	2020-09-01		Yes	COVID lockdowns	None	No		Yes	Key informant interviews (KII) were done with the park officers and security personnel by telephone, messenger app, and video call to collect detailed information and also to verify data collected from various other sources	Selected		Interviews	Field sampling/Interviews	Affected wildlife	a) wildlife killed, (b) wildlife injured, (c) arrest incidents related to forest crime, and (d) arrest incidents related to wildlife crime	T tests
61	Jacob 2017	Land cover dynamics in the Simien Mountains (Ethiopia), half a century after establishment of the National Park	Consensus	Land cover dynamics in the Simien Mountains (Ethiopia), half a century after establishment of the National Park	Miro Jacob et al	2017	DOI 10.1007/s10113-016-1070-8	No	detect both land cover changes and treeline dynamics in the afro-alpine belt of the Simien Mountains using repeat photographs (1966‰ÛÒ2014) and to understand the biophysical and social drivers of these changes	Local	Africa	Africa	Simien Mountains	Other: Ethiopia		Terrestrial	Afro-alpine steppe		BA	With the aim of comparing the past vegetation cover with the current situation, the photographs were repeated in November 2014	Yes	1978	1966	1978	1980	2009 and then 2014		Yes	Inscription on the World Heritage list in 1978	Other: Outside	No		Yes	Expert evaluation	Selected		Historical photographs	Remote sensing	LULCC	Average woody vegetation chang	ANOVA test	Elevation, Elevation and distance to scout camp, density of houses
58	Songer 2009	Spatial and temporal deforestation dynamics in protected and unprotected dry forests: a case study from Myanmar (Burma)	Consensus	Spatial and temporal deforestation dynamics in protected and unprotected dry forests: a case study from Myanmar (Burma)	Melissa Songer et al.	2008	10.1007/s10531-008-9490-5	Yes	To analyze spatial and temporal changes in land cover in relation to deforestation dynamics in protected and unprotected dry forests.	Local	Asia	Asia	Northern edge of Myanmar‰Ûªs central dry zon	Other: Myanmar		Terrestrial	Tropical dry forest		CI	We assessed CWS‰Ûª effectiveness at retaining original land cover by comparing inter-period and overall rates of net deforestation found inside and outside CWS	Yes				1972	2005	33	No		Buffer	No		Yes		Selected	Utilized ground-truthing points and satellite imagery to assess classification accuracy.	Remote sensing	Remote sensing	Deforestation	Percentage of forest cover	Unsupervised classification and GIS analysis	Land cover change index
55	Zeng 2023	Monitoring the light pollution changes of China's mangrove forests from 1992-2020 using nighttime light data	Consensus	Monitoring the light pollution changes of China‰Ûªs mangrove forests from 1992-2020 using nighttime light data	Haihang Zeng et al	2023	doi: 10.3389/fmars.2023.1187702	No	Monitor the long-term light pollution changes of China‰Ûªs mangrove forests	National	Asia	Asia	Six coastal provinces (Guangxi, Guangdong, Fujian, Zhejiang, Hainan, and Taiwan)	China		Other: Coastal	Mangroves		CI		No				1992	2020		No		Other: Outside	No		Not mentioned		Selected		Remote sensing	Remote sensing	Light pollution	Light pollution intensity	Temporal changes of light-polluted	Mangroves distribution, nighttime light data
45	Pfeifer 2012	PAs: mixed success in conserving East Africa's evergreen forests	Consensus	PAs: Mixed Success in Conserving East Africa‰Ûªs Evergreen Forests	Marion Pfeifer et al	2012	doi:10.1371/journal.pone.0039337	Yes	We investigate PA effectiveness at local, landscape and national scales, comparing rates of deforestation within park boundaries with those detected in park buffer zones and in unprotected land more generally.	Regional	Africa	Africa	East Africa	Burundi;Democratic Republic of the Congo;Ethiopia;Kenya;Mozambique;Malawi;Rwanda;Somalia;United Republic of Tanzania;Uganda;Zambia	Other: Multiple: Africa	Terrestrial	Evergreen tropical forest		CI		Yes				2001	2009		No		Other: Buffer; PAs different categories	No		Not mentioned		Selected		Remote sensing	Remote sensing	Deforestation	Background forest loss	Spatial analysis	Accessibility (distance to roads, distance to towns, protection status and slope), vegetation burning (annual burning probabilities and pixel-specific fire frequency at annual resolution), and human population density
42	Nagendra 2004	Monitoring parks through remote sensing: studies in Nepal and Honduras	Consensus	Monitoring Parks Through Remote Sensing: Studies in Nepal and Honduras	HARINI NAGENDRA, CATHERINE TUCKER, LAURA CARLSON	2004	10.1007/s00267-004-0028-7	Yes	providing quantitative evaluations of the presence or absence of local participation in PA management	Local	Multiple	Asia; Other: Central America	Western Honduras; Southern Terai plains of Nepal	Other: Honduras; Nepal		Terrestrial			CI	We selected two PAs, Celaque National Park (CNP) in Honduras and the Royal Chitwan National Park Buffer Zone (RCNP-BZ) in Nepal, where different approaches with regard to local participation have attempted to achieve conservation. In CNP, the government had not included local populations in decision making during the period of our analyses, while in the RCNP-BZ, recent efforts had implemented par…	Yes				1: 1987 2: 1989	2000		Yes	Comanagement	Buffer	No		Yes		Selected		Remote sensing	Remote sensing	LULCC	Forest cover change	Spatial analysis	Field data on land cover classes, roads, towns, elevation, and slope, socioeconomic and demographic household surveys, and formal and informal interviews exploring forest uses and land-cover change
40	Gnansounou 2022	The co-management approach has positive impacts on mangrove conservation: evidence from the mono transboundary biosphere reserve (Togo-Benin), West Africa	Consensus	The comanagement approach has positive impacts on mangrove conservation: evidence from the mono transboundary biosphere reserve (Togo‰ÛÔBenin), West Africa	Gnansouno	2022	https://doi.org/10.1007/s11273-022-09894-0	Yes	Effectiveness of the comanagement approach for mangrove conservation in West Africa	Local	Africa	Africa	West Africa	Other: Togo; Benin		Other: Coastal	Mangroves	NA	BA	NA	Yes	2017	NA	NA	NA	NA	NA	Yes	Comanagement	None	No		Not mentioned	NA	Selected	NA	Interviews	Remote sensing	Degree of exposure of mangroves to the stressors	Perceived effectiveness of the co-management in reducing threats	Habitat Risk Assessment (HRA)
34	Kong 2022	Dynamic threats of nighttime light-represented human activities to giant pandas and their habitat	Consensus	Dynamic threats of nighttime light-represented human activities to giant pandas and their habitat	Lingqiao Kong et al	2022	https://doi.org/10.3389/fenvs.2022.1094406	No	We analyzed the spatial patterns of nighttime light intensity and their dynamic changes from 2000 to 2020 in the entire giant panda distribution area using long-term nighttime light remote sensing data, and evaluated the dynamic threats of nighttime light-represented human activities to giant panda populations by proximity of light source and its intensity.	Regional	Asia	Asia	6 mountain regions (Qinling Mountain, Minshan Mountain, Qionglai Mountain, Daxiangling Mountain, Xiaoxiangling Mountain, and Liangshan Mountain)	China		Terrestrial	Evergreen coniferous forests and evergreen broadleaf forests		CI		Yes				2000	2020		No		Other: Outside	No		Not mentioned		Selected		Remote sensing	Remote sensing	Nighttime light intensity (Habitat fragmentation)	Intensity and range of nighttime light	Linear regression	Spatial data of vegetation, giant panda population, distances from the nighttime light sources to wild giant pandas, DEM
33	All 2017	Fire Response to Local Climate Variability: Huascaran National Park, Peru	Consensus	FIRE RESPONSE TO LOCAL CLIMATE VARIABILITY: HUASCARÌN NATIONAL PARK, PERU	John All et al	2017	doi: 10.4996/fireecology.130288764	No	analyze the patterns in fire occurrence, seasonality, and spatial distribution from 2002 to 2014; and 2) assess the relationships between temperature and precipitation and fire activity.	Local	South America	South America	Cordillera Blanca - Tropical Andes	Other: Peru		Terrestrial			CI		Yes				2002	2014		No		Buffer	No		Not mentioned		Selected		Remote sensing	Remote sensing	Fire	Burned Area and Active Fire		Fire and climate data
30	Shen 2021	PAs have remarkable spillover effects on forest conservation on the Qinghai‰ÛTibet Plateau	Consensus	PAs have remarkable spillover effects on forest conservation on the Qinghai‰ÛTibet Plateau	Yu Shen et al.	2022	10.1111/ddi.13466	Yes	whether PAs truly achieve conservation targets and whether they promote or inhibit natural habitat degradation in adjacent areas by blockage or leakage spillover	Regional	Asia	Asia	Qinghai-Tibet Plateau (QTP)	China		Terrestrial	Forest		CI (Matching)	Matching methods to compare deforestation rates inside PAs and their 20 km buffer zones with matched control areas based on the Global Forest Change dataset from 2001 to 2019. We contrasted the effects of NRs with different management levels, ages and areas	Yes				2001	2009	18	Yes	PA categories	Control	Yes	Matching	Yes		Selected		Remote sensing	Remote sensing	Deforestation	Deforestation rates	Linear model	NR age, population density of buffer zones, nnual precipitation, annual mean temperature, slope, elevation, distance to major roads and distance to settlements
29	Joppa 2011	Global PA impacts	Consensus	Global PA impacts	Lucas N. Joppa and Alexander Pfaff	2011	doi:10.1098/rspb.2010.1713	Yes	We estimate the impact of PAs on natural land cover within each of 147 countries by comparing outcomes inside PAswith outcomes outside	Global	Other: Global	Other: Global		Other: Global		Terrestrial	Multiple		CI (Matching)	We start with a random sample of 5 percent of each country‰Ûªs PA area (using 1 km2 pixel data). We compare this to a random sample,four times as large, drawn from the country‰Ûªs entire unpro-tected landscape.	Yes				2000	2005		No		Control	Yes	Matching	Yes		Selected		LULCC	Remote sensing	Natural land cover conversion	Percentage of natural vegetation	Matching	We considered GLOBCOVER300 categories 11 (irrigated croplands), 14(rainfed croplands), 20 (mosaic cropland 50‰ÛÒ70%), 30(mosaic cropland 20‰ÛÒ50%) and 190 (urban areas greaterthan 50%, elevation, ecoregions, Agricultural suitability, We use plate 28 of the dataset,which includes climate, soil type, land cover and slope ofterrain to measure agricultural suitability, ranking each gridcell from 0 (n…
26	Szilassi 2021	Natura 2000 Areas, Road, Railway, Water, and Ecological Networks May Provide Pathways for Biological Invasion: A Country Scale Analysis	Consensus	Natura 2000 Areas, Road, Railway, Water, and Ecological Networks May Provide Pathways for Biological Invasion: A Country Scale Analysis	PÌ©ter Szilass et al	2021	https://doi.org/10.3390/plants10122670	No	Spatial distribution map of five common invasive plant taxa of Europe. What is the role of the HEN and Natura 2000 areas in the spread of the studied invasive species?	National	Europe	Europe	National	Other: Hungary		Terrestrial	Temperate forests and grassland		CI	Occurrence of five widespread invasive plant taxa in Hungary	No				2015			No		PAs different categories	No		Not mentioned		Selected		Species occurrence	Remote sensing	Invasive species	Infected and non-infected LUCAS points	Spatial analysis	Road and railway networks
23	Dwiyahreni 2021	Changes in the human footprint in and around Indonesia's terrestrial national parks between 2012 and 2017	Consensus	Changes in the human footprint in and around Indonesia‰Ûªs terrestrial national parks between 2012 and 2017	AsriA. Dwiyahreni, et al.	2021	https://doi.org/10.1038/s41598-021-83586-2	Yes	This study measured the change in the human footprint in and around 43 terrestrial national parks over 5 years, between 2012 and 2017.	National	Asia	Asia	Multiple	Other: Indonesia		Terrestrial	NA	7 bioregions: Sumatra, Kalimantan, Sulawesi, Nusa Tenggara, Maluku, Papua and Jawa Bali	CI		Yes	NA	NA	NA	2012	2017	5	Yes	2015 changes in the management of Indonesia‰Ûªs PAs. # forest guards in each park was reduced by 32% in 2017 compared to 2012	Buffer	No		Yes	RMSE	Selected	NA	Remote sensing	RS - Threat indices	Human Influence Index (HII)	Percent change of HF		Human population, Land transformation, Road , Settlement, Human access,
18	Kleemann 2022	Deforestation in Continental Ecuador with a Focus on PAs	Consensus	Deforestation in Continental Ecuador with a Focus on PAs	Janina Kleemann et al	2022	10.3390/land11020268	Yes	We identified hotspots of deforestation on the national level of continental Ecuador between 1990 and 2018, analyzed the most significant drivers of deforestation on national and biome level (the Coast, the Andes, The Amazon) as well as inside PAs in Ecuador by using multiple regression analysis	National	South America	South America		Other: Ecuador		Terrestrial	Native forest	Cloud forest, dry forest, manglar, paramo	CI		Yes				1990	2018		No		Buffer	No		Not mentioned		Selected		Remote sensing	Remote sensing	LULCC	Percentage of forest change	Multiple regression	PAs, land use/land cover, and deforestation
16	Wang 2023	Rapid and large changes in coastal wetland structure in China's four major river deltas	Consensus	Rapid and large changes in coastal wetland structure in China's four major river deltas	Xinxin Wang et al	2022	DOI: 10.1111/gcb.16583	Yes	we quantified the spatial‰ÛÒtemporal dynamics of total area (TA) and patch number (PN) of coastal wetlands with different sizes in the four deltas and the PAs (PAs) and assessed the effects of major driving factors during 1984‰ÛÒ2020. We also investigated the effectiveness of PAs through the comparison of TA and PN of coastal wetlands before and after the years in which PAs were listed as Ramsar …	Regional	Asia	Asia	China's four major river deltas (the LRD, YRD, YtRD, and PRD	China		Freshwater	Coastal wetlands		BA		Yes		1984	2020				Yes	BA Ramsar declaration	None	No		Yes		Selected		Remote sensing	Remote sensing	LULCC and invasive species	Patch numbers (PNs) of coastal wetlands and Spartina saltmarshes and calculated the total areas (TAs) of coastal wetlands, Spartina saltmarshes, and reclamation zone within each delta and PA. Furthermore, we calculated the patch density (PD)	Geospatial and statistical analyses	EVI, NDVI, LSWI, mNDWI remote sensing indexes, Annual areas of invasive Spartina and reclamation in four major river deltas, Sea level data, sediment load
15	Carranza 2014	PA Effectiveness in Reducing Conversion in a Rapidly Vanishing Ecosystem: The Brazilian Cerrado	Consensus	PA Effectiveness in Reducing Conversion in a Rapidly Vanishing Ecosystem: The Brazilian Cerrado	Tharsila Carranza, Andrew Balmford, Valerie Kapos, & Andrea Manic	2013	doi: 10.1111/conl.12049	Yes	We examined the effectiveness of strictly protected and multiple-use PAs as well as indigenous lands (ILs) in reducing conversion in Cerrado from 2002 to 2009 by using matching methods to sample protected and unprotected sites similarly exposed to pressures.	Regional	South America	South America	Brazilian Cerrado	Brazil		Terrestrial	Tropical savanna	NA	CI (Matching)	Matching protected vs unprotected sites	No				2002	2009	8 years	No	NA	Control	Yes	Matching	Yes	Field inspections	Selected	NA	Remote sensing	Remote sensing	Land conversion	Absolute effect (difference between conversion in a control sample and in its matched PA (so a positive value means that the PA experienced less conversion than its control sites).	Matching	Measures of accessibility (distance to paved roads and nearest state or federal capital city, travel time to the nearest city with a population ‰ä´50,000 rainfall and agricultural suitability (based on features, such as soil fertility, slope, salinity, and risk of flooding)
12	Gracia 2011	Land-cover changes in and around a National Park in a mountain landscape in the Pyrenees	Consensus	Land-cover changes in and around a National Park in a mountain landscape in the Pyrenees	M.Gracia, et al.	2011	DOI 10.1007/s10113-010-0138-0	Yes	Degree, the conservation level of the park, determined the pattern of land-cover change in the area by comparing the results obtained within the park with those of unprotected, peripheral areas.	Local	Europe	Europe	Pyrenees massif	Other: Spain		Terrestrial	Mountain		CI	Compared the results obtained within the park with those of unprotected, peripheral areas. In the two areas with different protection level	Yes	NA	NA	NA	1957	2005		No	NA	Other: Outside	No		Not mentioned	NA	Selected	NA	Aerial photographs	Remote sensing	LULLC	Transition from one land cover to another	General linear model	DEM, land-cover type, forest cover, distance to villages, topographic variables
10	Bleher 2006	Assessment of threat status and management effectiveness in Kakamega forest, Kenya	Consensus	Assessment of threat status and management effectiveness in Kakamega Forest, Kenya	BÌ?rbel Bleher, Dana Uster, Thomas Bergsdorf	2006	DOI 10.1007/s10531-004-3509-3	Yes	Quantify human impact and evaluate management effectiveness in Kakamega Forest, western Kenya.	Local	Africa	Africa	Western Kenya	Other: Kenya		Terrestrial	Tropical rainforest	NA	BACI	In order to evaluate effectiveness of conservation measures we asked how differently managed and PAs differ in their level of human impact	Yes	1986	1933	1986	1986	2003	Previous study (1996) - Sampling on 2002/3	Yes	Management institutions	Other land uses	No		Not mentioned	NA	Selected	NA	Disturbance surveys	Field sampling/Interviews	Logging	Trees logged per hectare
9	Anderson 2020	The role of PAs in mitigating human impact in the world's last wilderness areas	Consensus	The role of PAs in mitigating human impact in the world‰Ûªs last wilderness areas	Emily Anderson, Christos Mammides	2019	https://doi.org/10.1007/s13280-019-01213-x	Yes	We used the human footprint index to measure the extent to which the world‰Ûªs last wilderness areas have been impacted by human activities‰ÛÓbetween 1993 and 2009‰ÛÓand whether PAs have effectively reduced human impact.	Global	Other: Global	Other: Global	Global	Other: Global		Terrestrial	14 terrestrial biomes	Wilderness areas - Lowest 10% of human influence score	CI (Matching)		Yes				1993	2009	16 years	No	NA	Control	Yes	Matching	Not mentioned		Selected	NA	HFI	RS - Threat indices	HFI change	Human footprint	Wilcoxon test, Kruskal‰ÛÒWallis test	Controlling for differences in elevation and slope
8	Hill 2021	Global protected-area coverage and human pressure on tidal flats	Consensus	Global protected-area coverage and human pressure on tidal flats	Narelle K. Hill et al	2020	DOI: 10.1111/cobi.13638	Yes	We conducted the first global analysis of the PA coverage of tidal flats (2014‰ÛÒ2016), human pressure on tidal flats (2014‰ÛÒ2016), and change in tidal flat extent inside and outside PAs from 1999 to 2016.	Global	Other: Global	Other: Global	Global	Other: Global		Other: Coastal	Tidal flats		CI	Net tidal flat change between 1999‰ÛÒ2001 and 2014‰ÛÒ2016 was quantified and compared inside and outside of the PA network and for individual PAs. Only PAs established before 1999 (n = 5927) were considered to ensure that observed changes in tidal flat extent could not occur prior to PA implementation	No		1999	2001	2014	2016		No		Other: Outside	No		Not mentioned		Selected		Remote sensing	RS - Threat indices	Human modification map (HMc)	Human pressure	Random forest	Coverage of marine and terrestrial realms, country-level governance effectiveness (world governance indicators) (Kauffman et al. 2010), and jurisdiction (marine, coastal, and terrestrial PA) and designation (national, in ternational, and regional PA. HMc: population density, built-up areas, cropland, livestock, major roads, minor roads, two-tracks, railroads, oil wells, wind turbines, powerlines,…
6	Verma 2020	Severe human pressures in the Sundaland biodiversity hotspot	Consensus	Severe human pressures in the Sundaland biodiversity hotspot	Megha Verma et al	2019	DOI: 10.1111/csp2.169	No	Here, we provide an assessment of changes in human footprint within PAs, KBAs, and bird ranges across Sundaland in Southeast Asia from 1993 to 2009.	Regional	Asia	Asia	Sundaland - Southeast Asia	Indonesia;Malaysia	Other: Multiple: Southeast Asia	Terrestrial	Lowland forest		CI		Yes				1993	2009		No		PAs different categories	No		Not mentioned		Selected		HFI	RS - Threat indices	HFI	HFI change	Statistical analysis	KBAs, bird species distribution maps
5	Gimmi 2013	Assessing naturalness in northern great lakes forests based on historical land-cover and vegetation changes	Consensus	Assessing Naturalness in Northern Great Lakes Forests Based on Historical Land-Cover and Vegetation Changes	Urs Gimmi, Volker C. Radeloff	2013	DOI 10.1007/s00267-013-0102-0	No	Historical trajectories in land-cover and forest communities for the Pictured Rocks National Lakeshore on Michigan‰Ûªs Upper Peninsula (USA)	Local	North America	North America	Michigan‰Ûªs Upper Peninsula	United States of America		Terrestrial	Forest	NA	CI		Yes		1850		1928	2000		No	NA	Buffer	No		Not mentioned	NA	Selected	NA	Naturalness of the landscape was assessed by analyzing the similarity between pre-settlement and current conditions	Remote sensing	Changes in land cover	Landscape continuity
4	Bhadouria 2012	Monitoring of organochlorine pesticides in and around Keoladeo National Park, Bharatpur, Rajasthan, India	Consensus	Monitoring of organochlorine pesticides in and around Keoladeo National Park, Bharatpur, Rajasthan, India	Bhumesh Singh Bhadouria & Vinod B. Mathur & Rahul Kaul	2012	DOI 10.1007/s10661-011-2340-z	No	To assess the organochlorine pesticide (OCP) residues in the sediments inside and around KNP.	Local	Asia	Asia	Keoladeo National Park	Other: India		Freshwater	Wetlands		CI	Assess the organochlorine pesticide (OCP) residues in the sediments inside and around KNP. Samples were collected from the different blocks of the park.	No						Not specified	No	NA	Other land uses	No		Not mentioned	NA	Selected	NA	Analysis of sediment samples - Gas chromatography		Concentrations of OCPs in sediment samples	Mean concentrations of pesticide residues in the sediment samples	Analysis of sediment samples - Gas chromatography

## Sheet: 1.2.1. Data extraction outcomes
Covidence #	Title	Comparator type 1	Comparator 1 description	Comparator type 2	Comparator 2 description	Comparator 3	Comparator 3 description	PAs involved	# PAs	PA name	PA type	PA_Type_mod	Level of protection	PA characteristics	Management strategies?	Community involvement	Declaration year	Formal buffer zone?	Analyzed buffer	buffer_mod	# threats analysed	Number of threats analyzed	Main threats	Main_threats_mod	Specific threats	Main outcomes reported	Threat 1	A. Have threats changed within PA over time?	A. Details	B. Have threats changed outside PA?	B. Details	C. PA more effective than outside/control?	C. Details	D. Are stricter PA categories more effective?	D. Details	E. Threat lower in gradient?	E. Details	F. Were human-dominated areas more prone to threats?	F. Details	G. Was the outcome attributed to the effectiveness of PAs?	G. Details	H. Evaluates the impact of PAs but also compares the performance between groups?	H. Details	Multiple areas analyzed separately? (Check in data extraction form)	Threat 2	A. Have threats changed within PA over time?	2A Description	B. Have threats changed outside PA?	2B Description
387	Management impacts on fire occurrence: A comparison of fire regimes of African and South American tropical savannas in different PAs	PA - Management interv.	We compare the pre-and post-management fire history (progressive reduction of livestock and fire brigades)	PA - PA buffer	In data extraction		NA	Multiple	3	In data extraction	National park	National park	High	In data extraction	Yes	Yes	In data extraction	Yes			Single	1	7.1 Fire & fire suppression	7.1 Fire & fire suppression	Fire	No significant change in total burned area for each PA. We also observed a seasonal shift in burning, with fires happening later in the fire season after management intervention	Fire	Neutral	NA	Neutral		Neutral		NA		NA		NA	parks under higher human influence suffered less burning after management interventions, while the opposite was observed for the remote Itremo	Partially	Significant reduction in the number of ignitions for Ibity NPA and Serra do Cipo NP after livestock exclusion and active fire suppression, but no significant change in total burned area for each PA. The effect was the modification of the fire regime	Yes	Brazilian PA had better performance in reducing fire: The strongly enforced fire suppression policy in Brazil and the significant reduction in human activities on the SCNP have resulted, over 32 years, in longer fire return intervals, lower percentages of burned area, and fewer ignitions when compared with Malagasy parks.	No
385	Using nighttime lights to assess infrastructure expansion within and around PAs in South America	PA - PA categories		Inside - Outside				Multiple - Mixed types	2902		IUCN I, II, III, IV, V, VI, and others	IUCN I, II, III, IV, V, VI, and others	Mixed	WDPA Sep 2018	Non reported	Non reported		Not mentioned	100	100	Combined	1	Other: Urbanization	Other: Urbanization	Infrastructure expansion: deforestation, water and air pollution, illegal hunting, biota homogenization, and noise and light pollution	In general PAs in all of the seven IUCN categories are buffering the intrusion of infrastructure within them, but this was not the case for PAs in multiple-use categories where there was a considerable increase in infrastructure within these PAs	Urbanization	In data extraction		In data extraction		In data extraction		Yes	Strictly protected PAs had less infrastructure expansion within their borders(from 0 to 704 km2) than multiple use categories(from 0 to 1960 km2)	NA		NA		In data extraction	At the continental scale, our results show that in general the PAs system in South America is buffering the intrusion of infrastructure within PAs. Between 2001 and 2011, while some infrastructure expansion occurred within PAs, the majority occurred around the PAs	Yes		Yes
380	Differential vulnerability to biological invasions: not all PAs (and not all invaders) are the same	PA - PA buffer		PA - Management interv.				Multiple - Mixed types	111		Special Areas of Conservation, Special Protection Areas (SPAs) with NR, NP status	Special Areas of Conservation, Special Protection Areas (SPAs) with NR, NP status	Mixed		Yes	Non reported		Not mentioned	We considered cells with overlapping values between 1 and 60% as ‰Û÷belt zones	Not specified	Single	1	8 Invasive & other problematic species, genes & diseases	8 Invasive & other problematic species, genes & diseases	Invasive species	APAs hosted fewer regulated IAS, N2K sites did not perform better than belt zones. Fewer regulated IAS that spread through natural dispersal or intentional human assistance in APAs compared to N2K and belt zones	Invasive species	NA		NA		In data extraction	We did not observe a better performance of N2K sites compared to their adjacent unPAs in terms of IAS richness	Yes	areas with higher protection levels would host fewer regulated IAS‰ÛÓwas only partially corroborated, as we observed a weak pattern of APAs hosting fewer regulated IAS than N2K sites and their belt zones, but no differences between N2K sites and their surrounding belts	NA		NA		In data extraction	There were fewer species that spread through natural dispersal or intentional human assistance in APAs than in N2K and belt zones	Yes		Yes
375	Road-effect mitigation promotes connectivity and reduces mortality at the population-level	PA - Management interv.		Inside - Outside				Single	1	Presqu'ile Proå?vincial Park			Non reported		Yes	Non reported		Not mentioned	3 km control site	3	Single	1	4 Transportation & service corridors	4 Transportation & service corridors	Transportation	Exclusion fencing reduced the number of turtles and amphibians on the road but had no effect for snakes. Efficacy of road-effect mitigation for proå?tecting wildlife, especially for reptiles and amphibians	Transportation	Decreased	Exclusion fencing reduced the number of turtles and amphibians on the road but had no effect for snakes.	NA		Yes	The exclusion fencing installed in Presqu'ile PP to mitigate herpeå?tofauna road mortality significantly reduced the number of turtles and amphibians on the road compared to our control site. This change was not only statistically significant, but also biologically meaningful‰ÛÓthe estimated reduction was approximately 70% for both taxa.	NA		NA		NA		Yes	Effects are taxon-specific	NA		No
360	Impacts of conservation incentives in PAs: The case of Bolsa Floresta, Brazil	PA - Management interv.		PA - PA buffer				Multiple	15	NA	Multiple use reserve	Multiple use reserve	Non reported		Yes	Yes		Not mentioned	NA	Not specified	Multiple	2	5.3 Logging & wood harvesting; 7.1 Fire & fire suppression	5.3 Logging & wood harvesting; 7.1 Fire & fire suppression	Deforestation, fire	Forest threats were low before and after treatment, because the program prioritized low-pressure sites. Thus, we find significant but small additional conservation effects from the implementation of the program. Notwithstanding, treatment effects are relatively larger in areas with higher deforestation pressure and higher potential agricultural income	Deforestation	Decreased	Lower average annual deforestation rates (3 km2/yr) after the program start than non-BFP reserves (8 km2/yr), so a naÌøve comparison would have led to an overestimation of BFP impacts (cf. Figure A3). However, the BFP reserves already had lower annual average deforestation rates (2 km2/yr) before treatment than non-BFP reserves (4 km2/yr).	Decreased		Yes	Over 850 ha of forest were saved	NA		Yes	Treatment effects are relatively larger in areas with higher deforestation pressure and higher potential agricultural income	No	conservation effects concentrate in areas near markets and at reserve boundaries, and where ex-ante deforestation pressure is relatively high	No	Forest threats were low before and after treatment, because the program prioritized low-pressure sites	NA		No	Fire	Neutral	no impact on fires	Neutral	no impact on fires
356	Urban sprawl into Natura 2000 network over Europe	Inside - Outside						Multiple	NA	NA	Natura 2000	Natura 2000	Non reported	NA	Non reported	Non reported	NA	No	NA	Not specified	Single	1	1 Residential & commercial development	1 Residential & commercial development	Urbanization	Urban cover inside Natura 2000 was 10 times lower than outside (0.4% vs. 4%) throughout the European Union. However, the rates of urban growth were slightly higher inside than outside Natura 2000 (4.8% vs. 3.9%), which indicates an incipient urban sprawl inside the network	Urbanization	Increased	Both outside and inside Natura 2000, urban growth increased from 2009 to 2012 and slowed down from 2012 to 2015 (F2, 128.79 = 25.79, p = 3.794e-10)	Increased		Yes	Urban cover inside Natura 2000 was 10 times lower than outside (0.4% vs. 4%) throughout the European Union.However, the rates of urban growth were slightly higher inside than outside Natura 2000 (4.8% vs. 3.9%), which indicates an incipient urban sprawl inside the network.	NA	NA	NA	NA	Yes	Natura sites affected most by urbanization were those surrounded by densely populated areas (i.e., urban clusters) that had a low number of species or habitats of conservation concern, albeit some member states had high urban cover or growth rate or both in protected sites with a large number of species or habitats of high conservation value	Partially	Natura 2000 is protected against urbanization to some extent, but there is room for improvement	Yes	Natura sites protected by the Birds Directive tended to have greater urban covers than those protected by the Habitats Directive	No
354	Human-climate interactions shape fire regimes in the Cerrado of SÌ£o Paulo state, Brazil	PA - PA buffer						Multiple	3	Assis, Santa BÌÁrbara, Itirapina	Strict full protection status	Strict full protection status	High	Preservation and sustainable use	Yes	Non reported	1980	Yes	7 km	7	Single	1	7.1 Fire & fire suppression	7.1 Fire & fire suppression	Fire	Fire regimes in PA were similar to those observed in buffer zones suggesting that fire-exclusion policies do not effectively prevent fires in PA that are surrounded by an anthropic matrix where fire is often used.	Fire	Increased	Neutral, Slighlty and increased for each PA	Increased	Neutral, Slighlty and increased for each PA	No	Fire regimes in PA were similar to those observed in buffer zones suggesting that fire-exclusion policies do not effectively prevent fires in PA that are surrounded by an anthropic matrix where fire is often used	NA	NA	NA	NA	NA	NA	No	Fire regimes in PA were similar to those observed in buffer zones suggesting that fire -exclusion policies do not effectively prevent fires in PA that are surrounded by an anthropic matrix where fire is often used.	Yes		No
351	How does the fire regime change after creating a PA in the Brazilian Cerrado?	PA - Management interv.	NA	PA - PA buffer				Single	1	Chapada das Mesas National Park (CMNP)	National park	National park	High	NA	Yes	Non reported	2006?	Not mentioned	20 km	20	Single	1	7.1 Fire & fire suppression	7.1 Fire & fire suppression	Fire	The creation of the park had significant effects on the density ignition when the periods before (1990‰ÛÒ2005) and after (2006‰ÛÒ2017) its creation were compared, and showed no significant effects on total annual area burned and average burn scar area.	Fire	Increased	analyzing the pattern of fire frequency over the 28 years, the size and total of burned areas, we found a larger annual burned area in the CMNP with higher fire frequencies during the studied period. In total, 38 % (611 km2) of the park had a fire frequency greater than 10 times while 15 % (246 km2) burned two to four times during the 28 year	Increased	B : 63 % of the area, A: 53 %	No	The spatial distribution of fire before and after the creation of the PA showed that 80 % and 79 % of the CMNP were burned at least once before and after its creation, respectively, while in the buffer 63 % of the area was burned before and 53 % after	NA	NA	NA	NA	NA	NA	No	No significant change in fire occurrence inside the park after its creation	No	NA	No
340	Assessment of National Parks affected by naturbanization processes in Southern Europe	PA - PA buffer						Multiple	3	IDE	NP and BR	NP and BR	High	IDE	Non reported	Non reported	IDE	Yes	15 km	15	Combined	1	LULC	LULC	1. Artificial surfaces (Urban fabric, Industrial, commercial and transport, Mine, dump and construction sites, Artificial, non-agricultural vegetated areas 2. Agricultural areas 3. Forest and seminatural areas 4. Wetlands and water bodies		LULCC	Increased	Slight increase 1, increase 2	Increased	Slight increase 1, increase 2	Slightly no	No x 2, 1 yes	NA		NA		Yes	As urban and natural areas get closer, there is an intensification of land uses	No	In a context of increasing intensification of land uses, PAs may not be sufficient to accomplish their role of protecting biodiversity	Yes	NA	No
339	Compound impact of land use and extreme climate on the 2020 fire record of the Brazilian Pantanal	PA - Other LU types	Rural properties, Indigenous lands, PAs					Multiple - Mixed types							Non reported			Not mentioned			Single	1	7.1 Fire & fire suppression	7.1 Fire & fire suppression	Fire	70% of the fires in 2020 occurred within rural properties, 5% in indigenous lands and 10% in PAs	Fire	Increased	11.74% area burned for the 1st time in 2020	Increased	72.81 % in rural properties; ILs 1.26%	Slightly yes		NA		No	More fires in PAs than Indigenous lands	NA		No		Yes	ILs, PAs, rural properties	No
329	An integrative analysis of threats affecting PAs in a biodiversity stronghold in Southeast Mexico	PA - PA buffer			NA		NA	Multiple - Mixed types	4	Cordon Pico Loro-Paxtal: CPL, El Triunfo Biosphere Reserve: ETBR, La Sepultura Biosphere Reserve: SEBR and La Frailescana LF			Non reported	NA	Yes	Non reported	IDE	Yes	10 km	10	Multiple	4	2 Agriculture & aquaculture; 5.3 Logging & wood harvesting; 7.1 Fire & fire suppression; HFI	2 Agriculture & aquaculture; 5.3 Logging & wood harvesting; 7.1 Fire & fire suppression; Human footprint	Deforestation, agriculture, HPI, fire. Also mentions human density, mining but not extracted	EBR and LF were affected mainly by forest loss (13.43% and 11.67% forest area lost, respectively) and fire incidence (between 0.02-0.73 and 0 e 0.81 fire hotspots/km 2, respectively). On the other hand, the ETBR and CPL had lower forest loss and fire incidence but higher mining presence (16.2% and 84.8% of their area involving this activity, respectively), and population density (on average 0.6 a…	Deforestation	Increased	Between 2010 and 2015, the entire study area had a forest loss	Increased	Between 2010 and 2015, the entire study area had a forest loss	Yes	The forest loss in the 10 km-wide buffer zone was higher than inside PAs amounting to 601.87 km2	NA	NA	NA	NA	NA	NA	NA		Yes		No	Agriculture	Increased	By 2015, the extent of agriculture, livestock and forestry in the PAs increased 32.85% (256.55 km2) with an annual rate of change of 5.85%.	Increased	the extent of agriculture, livestock and forestry in PAs increased by 9.97% (318.04 km2 ) with an annual rate of change of 1.92%
327	Influence of settings management and protection status on recreational uses and pressures in marine PAs	Inside - Outside		PA - PA categories				Multiple - Mixed types	3	NA	MPA	MPA	Mixed	2 Natural Reserve (NR) 1 Sustainable Management of Resources Area (SMRA)	Yes	Non reported	NA	Not mentioned	NA	Not specified	Multiple	2	5.1 Hunting, gathering, fishing ; 6.1 Recreational activities	5.1 Hunting, gathering, fishing ; 6.1 Recreational activities	Recreation; Fishing	Pressure indices were higher within no-take MPAs, except for fishing.	Recreational activities	NA		NA		No	Pressure indices pertaining to landing speed, and swimming activities appeared to be highest on MPA islets, which thus suffered from the highest level of pressure from these activities and behaviors	No	Depending on the threat. Snorkeling was more practiced at NR islets.	NA		Yes	Accessibility	No	NA	No	NA	No	Fishing	NA		NA
324	Deforestation in an African biodiversity hotspot: Extent, variation and the effectiveness of PAs	Inside - Outside						Multiple	142	WDPA 2010			Mixed		Non reported	Non reported		Not mentioned	Non-protected		Single	1	5.3 Logging & wood harvesting	5.3 Logging & wood harvesting	Deforestation	There was a marked contrast between rates of loss in protected and unPAs: forest in PAs was lost at approximately one third of the rate found outside PAs (4% and 11% respectively), while woodland in PAs was lost at approximately two thirds of the rate found in unPAs (33% and 45% respectively; Fig. 1 and Table 2). Of the remaining forest area, 74% is within PAs, compared to 32% for woodland.	Deforestation	Increased	Observed 25-y loss: 3.4%, 28,3& forest and woodland respectively Tabe 2	Increased	Observed 25-y loss: 7,4%46% forest and woodland respectively	Yes		NA		NA		Yes		No	Effectiveness at reducing woodland loss is particularly low: PAs reduce the expected conversion rate by just 16%. Our estimate of 40% effectiveness for forests; and 16% for woodland is very low compared to other estimates for this region	NA		No
322	Is the Natura 2000 network effective to prevent the biological invasions?	PA - PA categories		Inside - Outside				Multiple - Mixed types	N2k: 72 SAC and 39 SPA PAs: national parks, and natural reserves		Natura 2000	Natura 2000	Low		Non reported	Non reported		Not mentioned			Single	1	8 Invasive & other problematic species, genes & diseases	8 Invasive & other problematic species, genes & diseases	Invasive species	a stricter management of human pressure under additional regulations did not seem to prevent IAS occurrence in N2000 sites. The accessibility to protected sites seems to be a relevant factor explaining the IAS occurrence.	Invasive species	NA		NA		Neutral	There was no significant difference of the mean total IAS of fauna between protected and unprotected cells in the 100 comparisons done at P < 0.005. Likewise, the mean total IAS of flora was similar between protected and unprotected cells, except in the 2% of comparisons at p < 0.005	No	Within N2000 protected cells, those with an additional protection (APA, N å? 39) showed a mean total IAS similar to those with only N2000 protection (N å? 60), both in fauna (ANOVA, F1,97 å? 3,44, P å? 0.067; mean protected and additional, 2.56 å± 0.35; mean only N2000, 3.82 å± 0.50) and flora (ANOVA, F1,97 å? 0.14, P å? 0.709; mean protected and additional, 1.31 å± 0.34; mean only N2000, 1.48 å±…	NA		NA		No	N2k sites are as vulnerable to IAS as unPAs	Yes		No
321	Worldwide increase in Artificial Light At Night around PAs and within biodiversity hotspots	Inside - Outside	NA		NA		NA	Multiple	40701	NA			Mixed	WDPA 2016	Non reported	Non reported	2016	Not mentioned	0‰ÛÒ25 km	25	Single	1	Other: Urbanization	Other: Urbanization	Artificial Light At Night (ALAN)	We found that ALAN is low and stable over time within PAs, but is the highest in a first outer belt (< 25 km) around PAs, and tends to increase in a second outer belt (25‰ÛÒ75 km). In the meantime, ALAN is higher within BHs than outside, and is even the highest and increasing over time in an inner belt, close to their periphery	Urbanization	Neutral	Low and stable over time within PAs	NA	NA	Yes	Mean ALAN is lower within PAs, higher in their close surrounding (0‰ÛÒ25 km), tended to decrease further from the periphery of the PA borders. The mean ALAN appears lower (< 50 DN value) and stable from 150 km from PA borders (Fig. 2A-i)	NA		NA		NA		Partially	Low and stable over time within PAs, but is the highest in a first outer belt (< 25 km) around PAs, and tends to decrease after 25 km	NA		No
319	Evolving protected-area impacts in Panama: impact shifts show that plans require anticipation	Inside - Outside						Multiple	NA	NA			Non reported	Non indigenous lands	Yes	Yes	< 1992	Not mentioned	NA	Not specified	Single	1	5.3 Logging & wood harvesting	5.3 Logging & wood harvesting	Deforestation		Deforestation	Neutral	Defor. rate (1992‰ÛÒ2000) 0.01 Defor. rate (2000‰ÛÒ200) 0.05	Increased	Defor. rate (1992‰ÛÒ2000) 0.19 Defor. rate (2000‰ÛÒ2008) 0.30	Yes	Comparing clearing during 1992‰ÛÒ2000 for those locations that were forested in 1992 but unprotected (19%) with clearing in the same time period for protected forested lands (1%) suggests that almost all clearing was blocked	NA		NA		NA	PAs located on lands likely to face lower pressure for clearing.	No	PAs have lower deforestation rates than unPAs, but this difference is partially explained by factors like location and land characteristics	NA		No
317	Assessing variation in the effectiveness of IUCN PA categorisation. What remotely sensed forest integrity and human modification reveals across the major tropical forest biomes	PA - PA categories						Multiple - Mixed types	2069	WDPA, 2020	Category Ia (Strict Nature Reserve) and Ib (Wilderness area) are strictly protected; Categories II, III and IV; Category V and VI PAs: MUS; Not reported	Category Ia (Strict Nature Reserve) and Ib (Wilderness area) are strictly protected; Categories II, III and IV; Category V and VI PAs: MUS; Not reported	Mixed		Yes	Non reported		Not mentioned			Combined	1	Human footprint	Human footprint	Human modification	IUCN management category allocation played a minor role in influencing the modification and forest integrity observed within PAs. Instead, PA size was the most important determinant of these variables across the different regions under consideration.	Human footprint	NA		NA		NA		Neutral	IUCN management category allocation played a minor role in influencing the modification and forest integrity observed within PAs.	NA		NA		NA		Yes		No
314	Continuous growth of human footprint risks compromising the benefits of PAs on the Qinghai-Tibet Plateau	Inside - Outside						Multiple	53		National reserve	National reserve	High		Non reported	Non reported		Not mentioned			Combined	1	HFI	Human footprint	1) built environment (0‰öÕ 10); (2) Cropland (0‰öÕ 7); (3) Pasture lands (0‰öÕ 4); (4) Nighttime lights (0‰öÕ 10); (5) Population density (0‰öÕ 10); (6) Major roads (0‰öÕ 8); and (7) Railways (0‰öÕ 4).	We found that the human footprint on the Qinghai-Tibet Plateau has increased by 22% since 2000, and on average, human pressure inside NRs was 60% lower than outside. However, human pressure was identified in the majority of the NRs, with only 30% of protected land free from any measurable pressure. From a total of 53 NRs, 28 showed over 10% increase in human footprint, and 6 NRs had over 70% of t…	Human footprint	Increased	From a total of 53 NRs, 28 showed over 10% increase in human footprint, and 6 NRs had over 70% of their extent under intense human pressure (human footprint score‰ä´4).	Increased	We found that the human footprint on the Qinghai-Tibet Plateau has increased by 22% since 2000	Yes	On average, human pressure inside NRs was 60% lower than outside	NA		NA		NA		No	Human pressure was identified in the majority of the NRs, with only 30% of protected land free from any measurable pressure	NA		No
310	Analyzing multi-temporal satellite imagery and stakeholders' perceptions to have an insight into how forest co-management is changing the PA landscapes in Bangladesh	PA - Management interv.		PA - PA categories				Multiple	2	IDE	National park and Wildlife sanctuary	National park and Wildlife sanctuary	Mixed		Yes	Yes		Yes			Single	1	5.3 Logging & wood harvesting	5.3 Logging & wood harvesting	Deforestation	While the overall rate of forest cover loss declined from 33.56% during 2004‰ÛÒ2011 to 11.23% during 2011‰ÛÒ2017, the net impact on individual PA was not so positive: forest cover declination rate increased in LNP but decreased in TWS.	Deforestation	In data extraction						No	Higher forest loss in WS than NP	NA		NA		In data extraction	All parties except the direct beneficiaries of co-management activities had the same perception that co-management did not significantly improve the forest cover conditions in the PAs	Yes		Yes
302	Business as usual for the human use of Moreton Bay following marine park zoning	PA - Management interv.		Inside - Outside				Multiple	21	Moreton Bay Marine Park	Multiple-use	Multiple-use	Mixed	MPA	Yes	Non reported	1993	Not mentioned	Adjacent areas	Not specified	Single	1	5.1 Hunting, gathering, fishing	5.1 Hunting, gathering, fishing	Fishing	Measured changes in spatial patterns of fishing showed that the effects of rezoning on most fishing activity was minimal. After rezoning, the proportion of recreational fishing declined from 6.3 to 2.6% of the footprint in the new MNPs. The proportion of commercial fishing declined from 25 to 1%, although the amount of commercial fishing was low. There was an overall increase in fishing activity …	Fishing	Slightly decreased	The proportion of recreational fishing declined from 6.3 to 2.6% of the footprint in the new MNPs. Commercial fishing declined from 25 to 1%, although the amount of commercial fishing was low	Increased	Unlike the MNPs, the control areas had statistically significantly larger numbers of vessels fishing in summer and on the weekend	Yes	More fishing effort occurred outside the no-take zones after rezoning	NA		NA		NA		Partially	However, most of the no-take zones were areas not previously subject to high recreational fishing pressure	No		No
301	Ecological indicators for protection impact assessment at two scales in the Bozin and Marakhil PA, Iran	PA - PA buffer						Multiple	1	Bozin and Marakhil PAs			Non reported		Non reported	Non reported	1999	Not mentioned	15 km	15	Single	1	LULC	LULC	LULCC: Habitat fragmentation	The protection effect was scale dependent, with significant habitatloss and fragmentation atthe fine scale but not at the broad scale. Protection increased the number of large patches inside the park, as indicated by a shift from a truncated power law to a power law distribution of patch sizes	LULCC	Slightly decreased		Increased	The unprotected buffer zone however showed a substantial decrease in patch extension, patch isolation, contiguity and fractal dimension. Official protection maintained the contiguity and complexity of the landscape.	Yes	Forest patches in the PA were larger with higher extension, were less isolated, and more contiguous than the ones in the buffer zone in 2009	NA		NA		NA		NA		No		No
299	Many a little makes a mickle: Cumulative land cover changes and traditional land use in the Kyro reindeer herding district, northern Finland	Inside - Outside						Single	1				Non reported		Non reported	Non reported		Not mentioned	1.5 km	1.5	Single	1	5.3 Logging & wood harvesting	5.3 Logging & wood harvesting	Deforestation	The herding district has experienced notable land cover changes during the past decades, and most of these changes were directly related to forestry. The proportion of continuous coniferous forests of the total forest cover declined from 92% to 78% between 1987 and 2013. Approximately one third of the forests outside current conservation areas were disturbed by forest management by 2013, and rema…	Deforestation	Slightly decreased	The proportion of continuous and disturbed forest of the total forest area. 1987: 97,3, 2013: 90,9	Increased	Outside conservation areas, the proportion of continuous forests of the total forest land declined from 88% to 69%	Yes	Approximately one third of the forests outside current conservation areas were disturbed by forest management by 2013, and remaining forests were notably more fragmented than forests within conservation areas	NA		NA		NA		NA		NA		No
295	Characterizing land disturbance in Atewa Range Forest Reserve and Buffer Zone	PA - PA buffer		PA - Management interv.				Single	NR		Forest reserve	Forest reserve	Non reported		Yes	Non reported		Not mentioned	Used but not defined	Not specified	Single	1	5.3 Logging & wood harvesting	5.3 Logging & wood harvesting	Deforestation	Much of the peripheral closed and open vegetative covers have been converted to farms and bushes with little disturbance within the interior of the reserve. The study revealed that, the conservation management policies were yielding very little results due to a number of policy deficiencies including low staff strength, lack of logistics and low remuneration	Deforestation	Increased	Coverage of close and open forest declined by 33% and 55%, respectively from 1986 to 2013	Increased	Coverage of close and open forest declined by 33% and 55%, respectively from 1986 to 2013	Yes	The forest cover at the fringes of the reserve is being converted into shrubs/bushes, barelands, settlements and farms	NA		NA		NA		No	Results of the study suggest that, the Forest and Wildlife Policy of 1994 was incapable of curbing the degradation of the reserve	No		No
294	Are MPAs effective in removing fishing pressure from benthic species and habitats?	Inside - Outside		PA - Management interv.				Multiple	41		MPA	MPA	Mixed	Special Areas of Conservation (SACs) or Nature Conservation MPAs (NCMPAs)	Yes	Non reported		Not mentioned			Single	1	5.1 Hunting, gathering, fishing	5.1 Hunting, gathering, fishing	Fishing	While the measures do not reduce fishing pressure markedly, they do protect relatively pristine habitats from future fishing impacts.	Fishing	Neutral	Fig 2	NA		Neutral		No		NA		NA		No	current measures within the network are unlikely to significantly reduce the fishing pressure to which benthic habitats and species are expose	NA		No
292	Land use and landscape pattern changes on the inside and outside of PAs in urbanizing Selangor state, peninsular Malaysia	PA - PA buffer						Multiple	3	Klang Gate, Sungai Dusun, and Bukit Kutu wildlife reserves	Wildlife reserves	Wildlife reserves	Non reported		Non reported	Non reported		Not mentioned		Not specified	Multiple	4	1 Residential & commercial development; 2 Agriculture & aquaculture; 5.3 Logging & wood harvesting; LULC	1 Residential & commercial development; 2 Agriculture & aquaculture; 5.3 Logging & wood harvesting; LULC	Logging; Agriculture; Urbanization: Built-up area; LULCC: fragmentation	Klang Gate which located adjacent to the highly urbanizing area experienced a very significant loss of forest while built-up area and commercial agriculture gradually encroached into the reserve. It also has a higher degree of fragmentation and human impact than the other two reserves. Human impact inside of Klang Gate was concomitant to the outside. However, Bukit Kutu almost undisturbed and Sun…	Deforestation	Slightly increased	1 I, 2 N Fig 1	Increased		Yes		NA		NA		Yes	2Y 1Neu	No	Location	Yes		No	Agriculture	Slightly increased	I Neu SI Fig 3 and 5	Increased	Ix2 SI
288	Human pressure dynamics in PAs of China based on nighttime light	PA - PA buffer						Multiple	463						Non reported	Non reported		Yes	5 km	5	Single	1	1 Residential & commercial development	1 Residential & commercial development	Urbanization: Nighttime light	The LAI and LII increased by 3.22 and 3.51 times from 1992 to 2012, which showed that the area and intensity of NTL in PAs experienced simultaneous growth. We identified a significant increase of NTL within 36% of PAs and outside 60% of PAs, indicating the persistent increase in the intensity of human disturbance in and around these PAs.	Urbanization	Increased		Increased		Yes	36% of PAs and outside 60% of PAs	NA		NA		No	PAs in areas with low population density, such as Northeast and North China, experienced significant increase in human activities	No		No		No
286	Human footprint in Tibet: Assessing the spatial layout and effectiveness of nature reserves	PA - PA buffer						Multiple	23		Nature reserve	Nature reserve	Non reported		Non reported	Non reported	< 1990	Not mentioned	Buffer analysis	Not specified	Multiple	3	2 Agriculture & aquaculture; 4 Transportation & service corridors; HFI	2 Agriculture & aquaculture; 4 Transportation & service corridors; Human footprint	HFI; Agriculture; Transportation	The HFS inside the NRs of Tibet increased by 0.39 during 1990‰ÛÒ2010, while the score outside the NRs increased by 1.31 (Table 5). In terms of the relative rate of change, the value inside the NRs was also lower than the value outside the NRs.	Human footprint	Increased		Increased		Yes		NA		NA		NA		Yes	The establishment of national and provincial NRs in Tibet has been effective in reducing the impact of human activities on the natural environment.			No	Agriculture	Increased	Grazing intensity 0,16	Increased	0,71
280	Effectiveness of functional zones in National Nature Reserves for the protection of forest ecosystems in China	PA - Gradient						Multiple	69		National Nature Reserves	National Nature Reserves	High	NNRs are divided into: 1) core zone under strict protection because there is a concentrated distribution area of well-preserved ecosystems, rare and endangered species, and natural relics. 2) The buffer zones are designated around the core zones to mitigate or block interference to core zones. 3) The experimental zones are designated outside the buffer zones or core zones, and multiple activities…	Yes	Non reported		Yes			Single	1	5.3 Logging & wood harvesting	5.3 Logging & wood harvesting	Deforestation	The forest loss in NNRs showed a decreasing trend since 2011, indicating that NNRs reduced the forest loss. There was no significant difference of forest loss proportion (p = 0.42) between the core zones (0.60 å± 1.32%) and buffer zones (0.55 å± 0.88%), implying that their performance in forest con_x0002_servation was similar. There was a significant difference between experimental and core zones…	Deforestation	Decreased	Forest loss in NNRs showed a decreasing trend since 2011	NA		Neutral	No significant difference of forest loss proportion (p = 0.42) between the core zones (0.60 å± 1.32%) and buffer zones (0.55 å± 0.88%)	NA		NA		NA		Yes		Yes	The buffer and core zones performed better than the experiment zones in forest conservation	No
279	Landscape change in Southern Ecuador: An indicator-based and multi-temporal evaluation of land use and land cover in a mixed-use PA	PA - Management interv.						Single	1	CorazÌ?n de Oro Protective Forest	Mixed-use PA	Mixed-use PA	Low		Yes	Non reported	2000	Not mentioned			Single	1	LULC	LULC	LULCC	Landscape composition remained relatively unchanged over time, the creation of the PA significantly altered landscape configuration but curbed human pressure on evergreen montane habitats. The downsizing event increased anthropogenic pressure on highland pÌÁramo vegetation.	LULCC	Decreased	The creation of the PA significantly altered landscape configuration but curbed human pressure on evergreen montane habitats	Increased	The downsizing event increased anthropogenic pressure on highland paramo vegetation	NA		NA		NA		NA		NA		NA		No
273	A global assessment of the human pressure on the world's lakes	Inside - Outside		PA - PA categories				Multiple - Mixed types		WDPA Oct 2018	strictly protected (IUCN categories I‰ÛÒII), (b) non-strictly protected (IUCN categories III‰ÛÒVI), and (c) areas with no IUCN category reported	strictly protected (IUCN categories I‰ÛÒII), (b) non-strictly protected (IUCN categories III‰ÛÒVI), and (c) areas with no IUCN category reported	Mixed		Non reported	Non reported	< 1993	Not mentioned	NA	Not specified	Combined	1	HFI	Human footprint	HFI	One-third of the lakes are under considerable pressure. However, during the 16-year period examined, human pressure had increased in only 16% of the lakes, while it remained unchanged in 66%, and has even decreased in 18%. These patterns, though, were not uniform across the globe. Many lakes within tropical and subtropical regions, particularly in Africa‰ÛÓbut also in South America and Asia‰ÛÓexp…	Human footprint	Neutral	Increased in 21.5%, remained unchanged in 52.6%, and decreased in 25.9%.	Neutral	The human footprint had increased in 15.4% of the lakes outside PAs. outside PAs, there was either no change (68.0%) or the human footprint had decreased (16.6%).	Neutral	The matching analysis showed that in six of the fourteen (40%) biomes the change in human footprint was higher within lakes in PAs than lakes outside. the difference was statistically significant for only two of those	Slightly yes	The percentage of lakes within PAs in which human footprint had increased was higher in those with no IUCN category (24.4%) or a non-strict protection level (i.e., IUCN categories III‰ÛÒVI; 22.9%). Of those under strict protection (i.e., IUCN categories I‰ÛÒII), the human footprint had increased in 17.4% of them,	NA		Yes		Partially	the human footprint within the lakes in PAs had reduced in eight of the biomes. It is worth noting, though, that in five of those biomes the human footprint had actually decreased in most of the lakes regardless of the protection status. In fact, in boreal forests the reduction was higher outside PAs	NA		No
270	Recent land cover changes in Spain across biogeographical regions and protection levels: Implications for conservation policies	PA - PA buffer		PA - PA categories				Multiple - Mixed types					Mixed		Non reported	Non reported		Not mentioned	10 km	10	Multiple	3	1 Residential & commercial development; 2 Agriculture & aquaculture; 5.3 Logging & wood harvesting	1 Residential & commercial development; 2 Agriculture & aquaculture; 5.3 Logging & wood harvesting	Urbanization; Agriculture; Deforestation	we observed a lower intensity of anthropization processes in PAs, increasing the persistence of natural and agrarian areas; key habitats for species conservation. The highest persistence of natural areas corresponds to Nationally Designated Protected (NDP) areas, while in Natura Net 2000 we found the highest agrarian areas persistence. Nevertheless, Natura Net 2000 areas ‰ÛÒ with the exception of…	Urbanization	In data extraction		In data extraction		In data extraction		Yes	NDP experienced the lowest increases in artificial surfaces (34.6%, Table 3) and anthropization and urbanization processes from other land cover categories									Yes
267	Effectiveness in PAs at resisting development pressures in China	PA - PA buffer	We measured and compared the development pressure in PAs and within buffers the same size in the area of the PAs (namely outside of the PAs). We also investigated whether the performance of PAs will be threatened by outside development pressure.					Multiple	290		National level	National level	Non reported		Non reported	Non reported		Not mentioned	Equal area method, according to each PA size	Prop. PA size	Combined	1	LULC	LULC	LULCC	176 of the PAs had more development pressure outside their boundaries than inside PAs in 2018. For 175 PAs, we found a higher increasing rate of impervious areas outside of the PAs from 2000 to 2018, which suggested that increased human activities outside of the PAs were placing increased development pressure on the PAs. The PAs with higher development pressure outside their boundaries were more …	LULCC	Neutral	The average proportion of ISA outside of the PAs was 0.29% in 2018, which was higher than ISA inside the PAs of 0.06% (Fig. 2). Of the 290 PAs, 176 had a larger ISA outside of the PAs than inside the PAs.	Increased		Yes	The development pressure inside the PAs was lower than outside, as shown by the lower proportion of impervious surface areas (ISA, Fig. 2) and total nighttime light intensities (NTL, Fig. 3) inside the PAs.	NA		NA		Yes	it was more common for there to be higher pressures outside of the PAs than inside of the PAs in the more populated regions	Yes		No		No
266	European National Parks protect their surroundings but not everywhere: A study using land use/land cover dynamics derived from CORINE Land Cover data	PA - PA buffer		PA - Management interv.				Multiple	192		National park	National park	High	WDPA 2019	Non reported	Non reported	BA 1980	Not mentioned	1, 5 and 20 km	20	Combined	1	LULC	LULC	LULCC	The designation of a PA is a process that can increase it‰Ûªs the area‰Ûªs natural condition in a few years, thus providing a beneficial effect on its surrounding environment. However, this effect depends on the distance and when the PA was declared. The naturalization effect is more visible at the nearest buffer distances in reserves that have been protected for the longest time.	LULCC	Neutral	Anthropization percentages do not vary between PAs declared before and after 1980 (0.04% vs. 0.06%)	Neutral		Neutral	Both anthropization and naturalization processes are higher and similar in each NP boundary annular buffer from 1 to 5 km (1‰öÕ 5), while at the nearest (0‰öÕ 1) and farthest (5‰öÕ 20) distances naturalization is higher than anthropization (Fig. 5A)	NA		NA		NA		Partially	According to our results, establishing PAs exerts a beneficial effect on their surrounding environment, which is in	NA		No
264	Terrestrial PAs do not fully shield their streams from exogenous stressors	Inside - Outside	We selected 33 sampling sites in rivers and streams, 10 within and 23 outside PAs, with the latter being 1.3‰ÛÒ49.5 km distant from the nearest PA					Multiple - Mixed types	5	SÌ£o Joaquim National Park, Aparados da Serra National Park, Serra Geral National Park, SÌ£o Francisco de Paula National Forest, Private Natural Heritage Reserve			Non reported		Non reported	Non reported		No	Between 1.3‰ÛÒ49.5 km	50	Single	1	9 Pollution	9 Pollution	Water pollution	We found that the water quality of streams inside the PAs mirrored the exogenous anthropogenic inputs and represented the condition of the streams in the region as a whole.	Pollution	NA		NA		Neutral	Biological parameters (E. coli and total coliforms) showed no differences between PAs and non-PAs (U = 98.0, t = ‰ÛÒ1.235, respectively). Total coliform counts showed no significant differences (t = ‰ÛÒ1.143; Fig. 2f). We did not record statistically significant differences in the mean concentrations of the three classes of pesticides between streams inside and outside PAs (U = 111.0, 109.5 and 1…	NA		NA		NA		No	We found that the water quality of streams inside the PAs mirrored the exogenous anthropogenic inputs and represented the condition of the streams in the region as a whole.	NA		No
261	Are ranger patrols effective in reducing poaching-related threats within PAs?	PA - Management interv.						Single	1	Nyungwe National Park	National park	National park	Non reported		Yes	Non reported		Not mentioned	NA	Not specified	Single	1	5.1 Hunting, gathering, fishing	5.1 Hunting, gathering, fishing	Hunting	The probability of occurrence of poaching-related threats was highest at lower elevations (1,801‰ÛÒ2,200 m), especially in areas that were close to roads and tourist trails; conversely, occurrence probability was lowest at high elevation sites (2,601‰ÛÒ3,000 m), and near the park boundary and ranger posts. The number of ranger patrols substantially increased the probability that poaching-related …	Hunting	Decreased	the raw count of poaching-related activities and the naÌøve threat occupancy increased over the study period (2,759 threats or c. 20% naÌøve å?occupancy in 2006 to 9,473 threats or c. 51% naÌøve occupancy in 2015). Even though the raw count and naÌøve occupancy of threats were higher in the later years, the overall probability of occurrence of poaching-related threats was lower because detection …	NA		NA		NA		NA		Yes	These threats were distributed throughout the national park, but occurred in high numbers in the west and northwest portion of the park (Figure 1). Fewer threats were detected in the southern and central east portions of the park. This low encounter with threats was because of inaccessibility of these areas and potential violence due to unrest in neighbouring Burundi.	Yes	Increasing ranger patrols reduced the probability of poaching-related threats given that they were present in the previous year (ìµi ) within the park	NA		No
258	The sources and prevalence of anthropogenic noise in Rockfish Conservation Areas with implications for marine reserve planning	Inside - Outside						Multiple	3	Rockfish Conservation Areas	Conservation Areas	Conservation Areas	Non reported		Non reported	Non reported		Not mentioned	NA	Not specified	Single	1	4 Transportation & service corridors	4 Transportation & service corridors	Transportation: Underwater noise pollution	While RCAs had lower levels of noise overall than reference sites, this trend was inconsistent; some RCA sites had higher levels of noise during certain time periods than non-RCA sites.	Transportation	Increased	anthropogenic noise, both inside and near RCAs, is elevating sound pressure levels (SPL; dB re 1 ë?Pa)	Increased	RCA locations having fewer exceedances than unprotected sites, our findings nevertheless represent a potential for disturbance at all sites, especially in busier seasons	Neutral	We have not found evidence that Rockfish Conservation Areas (RCAs) in the Salish Sea provide consistent protection against potentially disruptive anthropogenic noise levels compared to nearby unPAs. The RCA sites had approximately equal (20‰ÛÒ100 Hz bandwidth) or lower noise levels (100 Hz‰ÛÒ10 kHz bandwidths) compared to unprotected reference sites	NA		NA		NA		No		NA		No
257	Quantifying the effects of deforestation and fragmentation on a range-wide conservation plan for jaguars	Inside - Outside						Multiple - Mixed types	Approx. 34% of the total area of JCUs is protected under various IUCN categories (I-VI), while only 11% of the corridors' total area is protected	Jaguar Conservation Units (JCUs)	Mixed protection levels (IUCN categories I-VI)	Mixed protection levels (IUCN categories I-VI)	Mixed		Non reported	Non reported		Not mentioned			Single	1	5.3 Logging & wood harvesting	5.3 Logging & wood harvesting	Deforestation	Collectively, protected sections of JCUs and corridors experienced lower rates of deforestation than unprotected sections	Deforestation	Increased		Increased		Yes	Protected sections of JCUs and corridors experienced lower rates of deforestation than unprotected sections	No	We performed individual analyses for each PA IUCN designation, but no range-wide pattern emerged (Appendix C).	NA	We performed individual analyses for each PA IUCN designation, but no range-wide pattern emerged	NA		No	Compared to JCUs, forest loss was higher in corridors for both protected and unprotected sites, suggesting that human pressure on remaining forest in corridors is high regardless of protection status	Yes		No
245	A twenty year GIS-based assessment of environmental sustainability of land use changes in and around PAs of a fast developing country: Spain	PA - PA buffer						Multiple - Mixed types			NRs (Nature Reserves), NPs (Nature Parks), SCIs (Sites of Community Importance), SPAs (Special Protection Areas)	NRs (Nature Reserves), NPs (Nature Parks), SCIs (Sites of Community Importance), SPAs (Special Protection Areas)	Mixed		Yes	Non reported		Not mentioned	1 and 5 km	5	Combined	1	LULC	LULC	LULCC: Land development, reservoir construction, expansion and intensification of arable land, crop conversion, newly irrigated areas, forest regression, colonization of vegetation on wetlands, forest succession.	The four PA networks were more environmentally sustainable than their surrounding areas although an effectiveness gradient was shown: NRs > SCIs > SPAs > NPs, suggesting little influence of PA management on LULC changes overall. Another gradient of environmental sustainability of control areas was evident: SCIs > SPAs > NPs > NRs.	LULCC	In data extraction		In data extraction		In data extraction		Yes	NRs > SCIs > SPAs > NPs	NA		NA		Partially	The effectiveness differs, the regulation stringency and limited influence of management on LULC change	Yes		Yes
243	Development stressors are stronger than PA management: A case of the Pantanos de Centla Biosphere Reserve, Mexico	PA - PA buffer						Single	1	Pantanos de Centla Biosphere Reserve	Biosphere Reserve	Biosphere Reserve	Medium	Protects coastal wetlands, includes core and buffer zones for sustainable resource use.	Yes	Yes		Yes	10 km	10	Single	1	2 Agriculture & aquaculture	2 Agriculture & aquaculture	Agriculture	Agriculture and livestock lands doubled, even within the core conservation areas of the PCBR. The greatest loss was in the flooded forest (48%), where the reduction was similar in and around the reserve.	Agriculture	Increased		Increased		Neutral		NA		NA		NA		No	Management practices were insufficient to counteract external development pressures.	NA		No
237	Protection status and national socio-economic context shape land conversion in and around a key transboundary PA complex in West Africa	PA - PA buffer		PA - PA categories				Multiple - Mixed types		W-Arly-Pendjari PA complex	Transboundary PA (TBPA): IUCN category II, IV, VI, no category	Transboundary PA (TBPA): IUCN category II, IV, VI, no category	Mixed		Yes	Non reported	2006	Yes	10 km	10	Single	1	2 Agriculture & aquaculture	2 Agriculture & aquaculture	Agriculture	Widespread agricultural expansion outside PAs over the past 13 years. PAs with high protection status appear considerably more effective at preventing land conversion than other PAs	Agriculture	Increased	Between 2000 and 2013, PAs collectively lost 6.4% of their natural vegetation (c. 2280 km2)	Increased	Whereas buffer zones lost 24.4%	Yes	PAs were more effective than surrounding buffer zones at protecting natural vegetation (Fig. 3)	Yes	PAs with high protection status appear considerably more effective at preventing land conversion than other PAs. PAs with higher levels of protection were better at preventing agricultural encroachment (Fig. 4). PAs of IUCN category II lost less natural vegetation than PAs with lower or no reported status	Yes		NA	Differences in rural population growth	Yes	Successful at protecting natural vegetation from agricultural expansion	Yes		No
234	Assessing biological invasions in PAs after 30 years: Revisiting nature reserves targeted by the 1980s SCOPE programme	PA - Management interv.						Multiple	21		Nature reserves and national parks	Nature reserves and national parks	Mixed		Yes	Non reported		Not mentioned	NA	Not specified	Multiple	3	8 Invasive & other problematic species, genes & diseases	8 Invasive & other problematic species, genes & diseases	Invasive alien species (plants, mammals, birds, amphibians, reptiles, freshwater fish)	Of all the taxa analysed, invasive plants pose the greatest continued threat, and their numbers have increased in 31% of the PAs. Conversely, mammal invasions now represent less of a threat due to effective management in many PAs; 43% of PAs show a decrease in listed invasive alien mammal taxa. Invasions of amphibians, reptiles, and fish have remained stable over the three decades; around half of…	Invasive species	Increased	increased in 31% of the PAs	NA		NA		NA		NA		NA		NA		NA		No	Invasive species	Decreased	43% of PAs show a decrease in listed invasive alien mammal taxa	NA
233	What determines the effectiveness of national PA networks?	Inside - Outside						Multiple - Mixed types		WDPA	Strict protection (IUCN category I and II) and less strict protection (IUCN categories III‰ÛÒVI).	Strict protection (IUCN category I and II) and less strict protection (IUCN categories III‰ÛÒVI).	Mixed		Non reported	Non reported		Not mentioned			Single	1	5.3 Logging & wood harvesting	5.3 Logging & wood harvesting	Deforestation	We estimate that national PAs established between 2000 and 2012 reduced deforestation in those areas by 72%, avoiding 86 062 km2 of forest loss. The effectiveness of national PAs varied by strictness of protection based on IUCN category. Strictly PAs reduced forest loss by 81% compared to what would have occurred without protection, while less strictly PAs reduced forest loss by 67%. Thus, the 26…	Deforestation	NA		NA		Yes	We estimate that national PAs established between 2000 and 2012 reduced deforestation in those areas by 72%, avoiding 86 062 km2 of forest loss that would have occurred without protection.	Yes	Strictly PAs reduced forest loss by 81% compared to what would have occurred without protection, while less strictly PAs reduced forest loss by 67%.	NA		NA		Partially		NA		No
225	Spatio-temporal analysis of the human footprint in South Ecuador: Influence of human pressure on ecosystems and effectiveness of PAs	Inside - Outside		PA - PA buffer				Single	1	Podocarpus National Park	National park	National park	Non reported		Non reported	Non reported	1982	Yes			Combined	1	HFI	Human footprint	HFI	We found that levels of human pressure increased and the wildest areas decreased since 1982. odocarpus NP, the most important PA in our study region,seems to be partially effective in reducing human pressure inside and in the buffer zones where only alow increase in HF was detected. However, the HF values observed in the surrounding landscape werehigher than those observed in the buffer zone and …	Human footprint	Increased	For 1982 the mean HF inside the PNP was 1, indicating that there was almost no human pressure. For 1990 a slight increase in the mean HF value was recorded in the innermost areas of the PNP that decreased again until 2008.	Increased	In the buffer areas, there was an increase in the mean HF.	Yes		NA		NA		Yes		Partially	NP seems to have been largely successful in avoiding human pressure inside its boundaries since the observed increase in the levels of human pressure during the study period was less than that observed in the unprotected surrounding area	No		No
223	Human transformation of ecosystems: Comparing protected and unPAs with natural baselines	Inside - Outside						Multiple - Mixed types	29	National large-scale specially PAs	Protected Landscape Areas, National parks	Protected Landscape Areas, National parks	Non reported		Non reported	Non reported		Not mentioned	NA	Not specified	Combined	1	LULC	LULC	LULCC	The mean HANPP (indicating the intensity of ecosystem exploitation) in large-scale PAs (MHANPP = 42.92%, SEHANPP = 2.031%, N = 29) was significantly lower than the country average of non-PAs of 63.75%, suggesting that the level of anthropogenic pressure on ecosystems was significantly lower than on the overall country level (p < 0.001)	LULCC	Increased		Increased		Yes		NA		NA		NA		Yes	we provide evidence that PAs in a Central European country, the Czech Republic, preserve ecosystems and biodiversity better than the surrounding landscape with regard to the outcomes of human induced transformation of landscape.	NA		No
218	Spatial-temporal pattern analysis of landscape ecological risk assessment based on land use/land cover change in Baishuijiang National nature reserve in Gansu Province, China	PA - Gradient						Single	1	Baishuijiang National Nature Reserve	Nature reserve	Nature reserve	High		Yes	Non reported		Yes	Core, buffer and experimental zone	Not specified	Multiple	3	2 Agriculture & aquaculture; 5.3 Logging & wood harvesting; LULC	2 Agriculture & aquaculture; 5.3 Logging & wood harvesting; LULC	Agriculture; Deforestation; LULCC	The area of forest accounted for more than 83% and represented an increasing trend from 1986 to 2015 (from 83.12% in 1986 to 88.54% in 2015). The area of cultivated land showed a decreasing trend, and the ratio of it to the total area decreased from 10.42% in 1986 to 5.84% in 2015. The area ratios of the other LULC types were relatively stable from 1986 to 2015.	Deforestation	Slightly decreased	The area of forest accounted for more than 83% and represented an increasing trend from 1986 to 2015 (from 83.12% in 1986 to 88.54% in 2015).	Increased	In the experimental zone, Forest increased significantly from 1986 to 2015, the ratio of it increased from 65.80% to 81.23% with an increasing area of 102.61 km2	Slightly yes	Human activities are most frequently conducted in the experimental zone, including the implementation of the Grain for Green Project.	NA		NA		NA		Yes	The study evaluated the effectiveness of environmental protection programs in Baishuijiang National Nature Reserve by assessing the landscape ecological risk based on land use/land cover changes from 1986 to 2015. The results showed that the ecological risk level was generally low within the nature reserve during the study period, suggesting the positive impact of the protection measures.	Yes		No	Agriculture	Slightly decreased	The area of cultivated land showed a decreasing trend, and the ratio of it to the total area decreased from 10.42% in 1986 to 5.84% in 2015.	Decreased	Decreased from 28.32% to 15.75%
213	Changes in habitat quality of nature reserves in depopulating areas due to anthropogenic pressure: Evidence from Northeast China, 2000-2018	PA - PA buffer						Multiple	93		Nature reserve	Nature reserve	High	26 NR at the national level and 67 at the local level	Non reported	Non reported	< 2000	Not mentioned	10 km	10	Combined	1	HFI	Human footprint	HFI: growth rates of population density, electricity infrastructure, roads, and railways	anthropogenic pressure within nature reserves has been greatly eased and the habitat quality has improved. Along with depopulation, the anthropogenic pressure in more than half of the PA in Northeast China declined between 2000 and 2018. Net primary production increased in almost all nature reserves, and fractional vegetation cover improved in three quarters of nature reserves.	Human footprint	Slightly increased	The average AP score for the 93 NRs increased from 2.658 in 2000 to 2.840 in 2018 with a rate of increase of 6.84% (Table 3), which was lower than the overall rate of increase of 9.30% for Northeast China (Table 2). the AP in more than half of the PA in Northeast China declined beå?tween 2000 and 2018.	Increased		Yes		NA		NA		NA		Partially	39 had mitigated human disturbance (average area of 448.98 km2), and 54 had failed to mitigate human pressure (average area of 300.87 km2). This shows that NRs with smaller areas were more susceptible to AP.	Yes	national-level NRs performed better than local-level NRs in mitigating AP.	No
209	Have China's national forest reserves designated since 1990 conserved forests effectively?	Inside - Outside	1) reserves and their surå?rounding areas,	PA - PA buffer	3) core, buffer, and transition zones.		2) reserve designation categories (i.e., 1990‰ÛÒ1999, 2000‰ÛÒ2009, and 2010‰ÛÒ2019), and	Multiple	184	84 forest reserves, 74 have available explicit management zoning designations (i.e., core, buffer, and transition)	Forest reserves	Forest reserves	Non reported		Yes	Non reported	1990	Yes	6 km	6	Single	1	5.3 Logging & wood harvesting	5.3 Logging & wood harvesting	Deforestation	We found that overall forest cover increased and fragmentation decreased from baseline years, when reserves were designated, to 2019 in both reserves and their surrounding areas, and only the increase in forest cover relative to baseline was significantly greater in reserves than in surrounding areas. The designation time of reserves under national protection had no considerable effect on changes…	Deforestation	Decreased	Forest cover increased and fragmentation decreased from baseline years, when reserves were designate	Decreased	to 2019 in both reserves and their surrounding areas	Yes	The increase in forest cover relative to baseline was significantly greater in reserves than in surrounding areas	NA		NA		NA		Partially	forest protection and regeneration programs were moderately successful. Forest cover declined and fragmentation increased in highly forested reserves, suggesting that forest protection and regeneration programs were moderately successå?ful	No		No
204	Sustainability of social-ecological systems under conservation projects: Lessons from a biodiversity hotspot in western China	PA - Gradient						Single	1	Foping National Nature Reserve	Nature reserve	Nature reserve	High	Established to protect giant panda habitat; includes various disturbance zones.	Yes	Yes	1978	Yes	The three zones represent social‰ÛÒecological systems with different disturbance intensities (i.e., slight, moderate and intense).		Multiple	2	2 Agriculture & aquaculture; 5.3 Logging & wood harvesting	2 Agriculture & aquaculture; 5.3 Logging & wood harvesting	Deforestation; Agriculture	Conservation projects had effectively protected the existing forests, facilitated vegetation recovery and economic development, and meanwhile the giant panda population in the FNNP had considerably increased.	Deforestation	Decreased	The forest areas continually increased from 1978 to 2007 with 69.9%, 82.0%, 84.4%, and 87.1% of the total study area in 1978, 1994, 2000, and 2007, respectively	NA		NA		NA		NA	The forest areas in the FNNR had been preserved at a high percentage, and forest cover along the edge of the nature reserve (i.e., in the moderately-disturbed zone) had been gradually expanded as well (Table 5). Thus, it seems that conservation projects (i.e., FNNR, GGP, and NFCP) have effectively protected the existing forest, increased forested area, and facilitated vegetation recovery in our s…	No		Yes	have effectively protected the existing forest, increased forested area, and facilitated vegetation recovery in our study region.	Yes		No	Agriculture	Decreased	From 2000 to 2007, croplands decreased from 12.6% to 3.7%, meanwhile, 46.6% and 31.9% of croplands had been respectively converted to broad-leaved forest and shrub/grassland during the same time period.	NA
201	How good is your marine PA at curbing threats?	PA - PA categories		Inside - Outside				Multiple	15		MPAs Fully protected, Partially protected,	MPAs Fully protected, Partially protected,	Mixed		Yes	Non reported		Not mentioned	10 km	10	Multiple	2	5.1 Hunting, gathering, fishing ; 6.1 Recreational activities	5.1 Hunting, gathering, fishing ; 6.1 Recreational activities	Fishing; Recreational activities	Fully PAs effectively eliminate extractive activities, whereas the intensity of artisanal and recreational fishing within partially PAs, paradoxically, is higher than that found outside MPAs, questioning their ability at reaching conservation targets. In addition, both fully and partially PAs attract non-extractive activities that are potential threats. Overall, only three of the 15 MPAs had lowe…	Fishing	Decreased		Increased	In the area outside MPAs, the intensity of extractive threats was up to 18 times greater than the intensity of non-extractive threats	Yes		Yes	Fully PAs effectively eliminate extractive activities, whereas the intensity of artisanal and recreational fishing within partially PAs, paradoxically, is higher than that found outside MPAs	Yes		NA		Partially	Fully PAs reduce fishing but increase non-extractive threats	Yes		No	Recreational activities	Increased	Fully and partially PAs attract non-extractive activities that are potential threats	Increased
196	Improving PA effectiveness through consideration of different human-pressure baselines	Inside - Outside	Our framework for assessing the effectiveness of PAs is based on a baseline-plus-change concept (Figure 1). The initial state of human pressure on PAs was taken as the baseline	PA - Gradient				Multiple	338		Nature reserve	Nature reserve	Mixed		Non reported	Non reported	< 2010	Not mentioned	10 to 50 km region outside	50	Combined	1	HFI	Human footprint	HPI	From 2010 to 2020, most PAs underwent no significant change in human pressure	Human footprint	Neutral	From 2010 to 2020, most PAs underwent no significant change in human pressure: 47.69% (n =93) of low HPI baselines, 78.70% (n =85) of medium HPI baselines, and 60.00% (n =21) of high HPI baseline	NA	NA	Yes	50.3% had significant positive effect. But baseline makes a big difference.	NA		NA		Yes	PAs with low HPI baselines, 76.92% (n =150) showed positive effects in resisting human pressure and 23.08% (n =45) showed negative effects. For PAs with medium HPI baselines, 11.11% (n =12) showed positive effects in resisting human pressure and 10.19% (n =11) showed negative effects. For PAs with high HPI baselines, 22.86% (n =8) showed positive effects in resisting human pressure and 77.14% (n …	Partially	PAs with different baselines should adopt different management measures to improve effectiveness. If differing baselines of PAs are ignored, the results may lead to misdirected management measures in resisting human pressure.	Yes		No
195	Land Use and Land Cover Dynamics Analysis of the Togodo PA and Its Surroundings in Southeastern Togo, West Africa	Inside - Outside						Single	1	Togodo PA			Non reported		Non reported	Non reported	NA	Not mentioned			Multiple	2	2 Agriculture & aquaculture; 5.3 Logging & wood harvesting	2 Agriculture & aquaculture; 5.3 Logging & wood harvesting	Deforestation; Agriculture	Over the last 42 years, the TPA and surrounding areas have undergone notable LULC change (Figures 3 and 4). Natural vegetation (Savannah and Forest) dominated the landscape at the early time intervals and decreased from 67% in 1974 to 64%, 42%, and 22%, respectively, in 1986, 2003, and 2016 (Appendix A). Savannah and Cropland were the most dominant LULC categories. Savannah decreased from 71,554.…	Agriculture	Increased	Over the last 42 years, the TPA and surrounding areas have undergone notable LULC change. Cropland experienced more gain than loss during all time intervals	Increased		NA		NA		NA		Yes		NA		No		No	Deforestation	Increased	Vegetation cover (forests and savannahs) experienced a decrease from 67% to 22%	Increased
187	An invasive species erodes the performance of coastal wetland PAs	Inside - Outside						Multiple	7	Nature reserve			High		Non reported	Non reported	1983 - 2000	Not mentioned			Multiple	2	8 Invasive & other problematic species, genes & diseases; LULC	8 Invasive & other problematic species, genes & diseases; LULC	Invasive species; LULCC: Land reclamation	Plant invasions were not only more extensive in PAs than non-PA controls but also undermined PA performance by, without human intervention, irreversibly replacing expansive native wetlands (primarily mudflats) and precluding successional formation of new native marshes. Exotic species are invading PAs globally.	LULCC	Decreased	After PA designation, wetland reclamation decreased in PA sites more than in statistically matched non-PA control sites	Increased		Yes	After PA designation, wetland reclamation decreased in PA sites more than in statistically matched non-PA control sites. Over time, reclamation became significantly lower in PA than non-PA control sites for all seven PAs	NA		NA		NA		Partially		NA		No	Invasive species	Increased		Slightly increased	Fig S1
185	PAs in South Asia have not prevented habitat loss: a study using historical models of land-use change	PA - Management interv.	PA creation	Inside - Outside			NA	Multiple	593	NA	IUCN I‰ÛÒIV	IUCN I‰ÛÒIV	Mixed	NA	Non reported	Non reported	< 2005	Not mentioned	NA	Not specified	Combined	1	LULC	LULC	LULC	Habitat conversion rates inside PAs are indistinguishable from those on unprotected lands, and habitat conversion rates do not decline following the gazettement of a PA.	LULCC	Increased	The mean amount of human modified land inside individual PAs varied from 39.4% to 43.1% among the three data sets	Increased	30% modified in 1889 and 50% in 2000, the pattern of increase in habitat conversion inside and outside PAs over time was similar	No	We compared habitat clearance rates before and after gazettement in South Asian PAs using a paired t-test, finding no significant difference despite sufficient power (t = 0.46, df = 560, p = 0.645), suggesting PAs are not effectively reducing habitat loss compared to unprotected lands	NA	NA	NA	NA	NA	NA	No	Similar patterns of habitat conversion inside vs outside	NA	NA	No
180	Effectiveness of Africa's tropical PAs for maintaining forest cover	PA - PA buffer	Outside a 10-km buffer					Multiple - Mixed types	224	NA	All	All	Mixed	IUCN I - VI	Yes	Non reported	<2013	Not mentioned	10 km	10	Single	1	5.3 Logging & wood harvesting	5.3 Logging & wood harvesting	Logging	Significant geographical variation existed among parks; the majority of parks had significantly less forest loss within their boundaries than control sites. Accessibility was a significant driver of forest loss. Relatively inaccessible areas had a higher probability (odds ratio >1, p < 0.001) of forest loss but only in ineffective parks, and relatively accessible areas had a higher probability of…	Deforestation	NA	NA	NA	NA	Yes	From 2000 to 2013, the majority of parks (69%) had significantly less forest loss than their respective matched unPAs.	Yes	Majority of the parks yes (69%)	NA	NA	NA	NA	Partially	The complexity of factors (such as geographical variation, accessibility, and park size and age) influencing the ability of a park to curb forest loss within its boundaries	No	NA	No
179	Exploring the relationships between marine PAs and invasive fish in the world's most invaded sea	Inside - Outside						Multiple	9		MPA	MPA	High	No fishing is allowed	Non reported	Non reported		Not mentioned			Single	1	8 Invasive & other problematic species, genes & diseases	8 Invasive & other problematic species, genes & diseases	Invasive species	Currently, invasive fish populations do better in Mediterranean MPAs than in unprotected sites. More specifically, we found that the biomass of the alien rabittfish (S. luridus) and the native range-expanding parrotfish (S. cretense) is significantly higher in two well-enforced MPAs (Zakynthos and Lampedusa) than in unPAs.	Invasive species	NA		NA		No	Currently, invasive fish populations do better in Mediterranean MPAs than in unprotected sites. More specifically, we found that the biomass of the alien rabittfish (S. luridus) and the native range-expanding parrotfish (S. cretense) is significantly higher in two well-enforced MPAs (Zakynthos and Lampedusa) than in unPAs.	NA		NA		NA		No		NA		No
177	Correlates of long-term land-cover change and PA performance at priority conservation sites in Africa	Inside - Outside						Multiple	54		Important Bird and Biodiversity Areas (IBAs)	Important Bird and Biodiversity Areas (IBAs)	Mixed	Categories I to VI	Non reported	Non reported	< 1985	Not mentioned	20 km	20	Combined	1	LULC	LULC	LULCC	Survival rates of natural land cover in PAs were, on average, around twice those in unPAs, but the differences between them varied along different environmental gradients.	LULCC	NA		NA		Yes	This revealed that PAs had lower rates of loss than unPAs, but the interactions in the model indicated that this pattern varied across the range of values of other parameters	NA				Yes	Interaction terms indicated that as slope and altitude increased, the natural protection offered by topography increasingly nullified the additional benefits of legislative protection	Yes	Furthermore, PA designation offered reduced additional benefits to the survival of natural land cover in areas where rates of conversion were higher at the start of the observation period	NA		No
175	The last frontiers of wilderness: Tracking loss of intact forest landscapes from 2000 to 2013	Inside - Outside						Multiple - Mixed types	NA	NA	IUCN I - III	IUCN I - III	Mixed		Non reported	Non reported	NA	Not mentioned	NA	Not specified	Single	1	5.3 Logging & wood harvesting	5.3 Logging & wood harvesting	Deforestation	PAs (IUCN I to III) were found to have a positive effect in slowing the reduction of IFL area from timber harvesting but were less effective in limiting agricultural expansion	Deforestation	Increased	Table 4	Increased	Table 4	Yes	Using matching sampling analysis, we found that the reduction of IFL area for reasons other than fire was 3.4 times higher outside PAs (6.2%) than within PAs (1.8%). Reduction of IFL area was more than 4 times higher outside PAs than inside PAs, whereas it was 2.6 times higher in Southeast Asia and almost double in tropical South America	NA		NA		NA		Yes	The results confirmed that legal protection has been effective at lessening the reduction of IFL area in all regions except Australia (where roads have been constructed near PA boundaries) and temperate South America (where new tourist infrastructure has been developed in a national park)	No		No
169	Mapping change in human pressure globally on land and within PAs	Inside - Outside						Multiple - Mixed types	36	PAs, including National Parks (six), National Game Reserves (one), Forest Reserves (five), National Monuments (one), and a combination of these plus game ranches and ungazetted forests (seven)	Important Birds Areas	Important Birds Areas	Mixed		Non reported	Non reported		Not mentioned			Combined	1	Multiple threats	Multiple threats	Multiple threats	Condition scores for protected IBAs improved slightly during 1999‰ÛÒ2005, compared to a negative trend in the state of unprotected IBAs (Fig. 4). By 2005, protected IBAs (n 5 20) were in better condition than those that were unprotected (n 5 16), though this difference was not statistically significant (Mann-Whitney test: U 5 0.111, P 5 0.11; Fig. 4).	Multiple threats	NA		NA		Neutral	By 2005, protected IBAs (n 5 20) were in better condition than those that were unprotected (n 5 16), though this difference was not statistically significant (Mann-Whitney test: U 5 0.111, P 5 0.11; Fig. 4)	NA		NA		NA		Yes	Protected IBAs had significantly higher scores for response than unprotected IBAs (U 5 24, P 5 0.001; Fig. 4).	No		No
162	Tracking the response of industrial fishing fleets to large marine PAs in the Pacific Ocean	PA - PA categories			NA		NA	Multiple - Mixed types	8950	NA	All	All	Mixed	NA	Non reported	Non reported	1995 - 2013	No	NA	Not specified	Combined	1	HFI	Human footprint	THFI: Based on human population density, land transformation, and electrical power infrastructure	Since 1990s, human pressure increased 64% of the terrestrial areas; the largest increases were in Southeast Asia. PAs also exhibited overall increases in human pressure, the degree of which varied with location and IUCN management category. Only wilderness areas and natural monuments (management categories Ib and III) exhibited decreases in pressure. PAs not assigned any category exhibited the gr…	Human footprint	Increased	Increased in human pressure over the 15 year, considerable variation among regions	NA	NA	NA	NA	No	PAs that lacked an IUCN category had the highest increases in pressure	Slightly yes	Habitat loss inside PAs is lower in reserves that are more strictly managed. But depends on regional patterns	NA	NA	NA	NA	Yes	PAs with no IUCN cat faced the highest threats	No
157	Size-dependent resistance of PAs to land-use change	PA - Management interv.		Inside - Outside				Multiple	5	Large MPAs	Marine PA	Marine PA	High		Yes	Non reported	2013 - 2017	Other: Not mentioned			Single	1	5.1 Hunting, gathering, fishing	5.1 Hunting, gathering, fishing	Fishing	After their implementation, all 5 MPAs successfully kept industrial fishing effort exceptionally low. Detected fishing effort was already low in 4 of the 5 large MPAs prior to MPA implementation, particularly relative to nearby regions that did not receive formal protection. Our results suggest that these large MPAs may present major conservation opportunities in relatively intact ecosystems with…	Fishing	Decreased	virtually no fishing was detected inside all 5 of our focal large MPAs after they were implemented, whereas up to 30,000 monthly fishing hours were observed in nearby EEZs that permit fishing	Increased		Yes		NA		NA		NA		Yes	Large MPAs can effectively maintain fishing effort at remarkably low levels. Our results suggest that most large industrial fishing vessels (because approximately 50-75% of vessels >24 m transmit AIS [Kroodsma et al. 2018]) do respect the boundaries of large MPAs	Yes		No
153	Southeast Asian PAs are effective in conserving forest cover and forest carbon stocks compared to unPAs	PA - PA buffer		PA - PA categories				Multiple	777		National parks, national reserves, regional parks, regional reserves and other PAs	National parks, national reserves, regional parks, regional reserves and other PAs	Non reported		Non reported	Non reported	< 1990	Not mentioned	2.5 and 5 km	5	Single	1	LULC	LULC	LULCC	the capacity of PAs to slow down habitat degradation and to favour habitat restoration is clearly related to their size, with smaller areas that on average follow the dominant land-use change pattern into which they are embedded	LULCC	NA		NA		Yes	PAs changed significantly less than the surrounding buffers	Yes	National reserves experienced a rate of change that was significantly lower than that of all the other types of reserve			NA		Yes	PAs to slow down habitat degradation and promote habitat restoration was closely linked to their size	Yes	National reserves experienced a rate of land-use change that was significantly lower than all other types of reserves	No
148	Indigenous, colonist, and government Impacts on Nicaragua's Bosawas Reserve	Inside - Outside						Multiple - Mixed types					Non reported	WDPA - 2018	Yes	Non reported	< 2000	No	Excluded buffers of 10 km	>=10	Single	1	5.3 Logging & wood harvesting	5.3 Logging & wood harvesting	Deforestation	PAs had three times less forest cover loss than similar landscapes without protection.	Deforestation	Decreased	PAs significantly reduced the loss of forest cover with the overall rate of forest cover loss across the region being three times lower inside PAs (n=692) over the period 2000 to 2018 than in the matched unprotected landscape	NA		Yes		NA		NA		NA		Partially	PAs that had completed management reporting using the Management Effectiveness Tracking Tool (METT) conserved significantly more forest cover and forest carbon stocks than those that had not.	NA		No
147	Landscape Fragmentation in Qinling-Daba Mountains Nature Reserves and Its Influencing Factors	PA - PA buffer		PA - Gradient				Single	1	Bosawas International Biosphere Reserve	Biosphere Reserve	Biosphere Reserve	Mixed		Yes	Yes		Yes	2 km	2	Single	1	5.3 Logging & wood harvesting	5.3 Logging & wood harvesting	Deforestation	Indigenous farmers deforested significantly less per capita than colonists, and the two indigenous groups in Bosawas did not differ significantly in their effects on the forest. Our results show that Indigenous common property institutions and Indigenous defense of homeland have been powerful factors in protecting the forests of Bosawa	Deforestation	In data extraction		NA		In data extraction		NA		NA		NA		In data extraction		Yes	Indigenous were most effective	Yes
132	The Sanjiangyuan Nature Reserve Is Partially Effective in Mitigating Human Pressures	PA - PA buffer						Multiple	10		Nature reserve	Nature reserve	Mixed	National nature reserves	Yes	Non reported		Yes	5	5	Single	1	LULC	LULC	LULCC: Habitat fragmentation	Most national nature reserves in the Qinling‰ÛÒDaba Mountains were moderately or highly fragmented during 2010‰ÛÒ2017, and the fragmentation degree of a few reserves exhibited a decreasing trend. (2) The fragmentation degree of landscape patches from the core areas to the experimental areas of the inner nature reserves showed a trend of being low in the middle and high in the surrounding area; th…	LULCC	Decreased	The degree of landscape fragmentation declined in seven nature reserves and increased in the remaining three reserves	Increased	The level of landscape fragmentation gradually decreased from the edge of 1 km (M-1) to 5 km (M-5). Human activities were relatively intense around the edges at 1 km (M-1), and the degree of landscape fragmentation in these areas was found to be high.	Yes		NA		NA		Yes	The high-value areas appeared in the regions with intense human activities, and the low-value areas were located in the regions with mild topographic relief	Partially	The land-use degree, human activity intensity, elevation, slope gradient, and topographic relief significantly affected the spatial differentiation of landscape fragmentation in the Qinling‰ÛÒDaba Mountains nature reserves, and anthropogenic activities play a leading role			No
128	Effectiveness of the Natura 2000 network for freshwater fish conservation in a Mediterranean region	PA - Gradient	PA core, buffer, experimental zones	Inside - Outside				Single	1	Sanjiangyuan National Nature Reserve	Nature reserve	Nature reserve	High	Divided into three functional zones: the core, buffer, and experimental areas,	Yes	Non reported	2003	Yes	Formal buffer but I extracted data from outside (Which is not so different from the buffer)	Not specified	Multiple	5	2 Agriculture & aquaculture; 3 Energy production & mining; 4 Transportation & service corridors; LULC; HFI	2 Agriculture & aquaculture; 3 Energy production & mining; 4 Transportation & service corridors; LULC; Human footprint	HFI; Urbanization: Population density; Agriculture: grazing intensity; Transportation: roads; LULCC	HF value for the Sanjiangyuan region was generally low from 1995 to 2015, with a fluctuating increasing trend. The SNR is partially effective in mitigating human pressures. For 2005‰ÛÒ2010, the HF values decreased both within and outside the reserve with more decreases for the outside. For the three functional zones of the SNR, our results show that the HF values decreased during 2005‰ÛÒ2010 for …	Human footprint	Increased	For 2005‰ÛÒ2010, both the inside and outside of the SNR experienced a reduction in HF value,	Slightly increased	Collectively, the spatial pattern of HF remained stable for the whole study period TABLE 4	Slightly yes	When analysing the whole time and not breaking by periods TABLE 4	NA		NA		NA		Partially	Conservation measures of the SNR succeeded partially in mitigating human pressures. The measures for 2005‰ÛÒ2010 were effective, with the HF values decreasing both within and outside the reserve, although the HF values decreased more outside the reserve than inside. The measures during 2010‰ÛÒ2015 were still partially effective considering the different conservation requirements of functional zon…	NA		No	Urbanization	Slightly increased		Slightly increased
125	Illegal settlement in the Babile Elephant Sanctuary is threatening the resident elephant population	Inside - Outside						Multiple	2,636		Natura 2000	Natura 2000			Non reported	Non reported		Other: The first buffer zone included sampling sites closest to a Natura 2000 (i.e. site in the buffer zone of 1 km from the Natura 2000 site) which were classified as Contiguous sites (n = 832 sampling sites). The second buffer zone included sampling sites from 2 to 3 km away the Natura 2000 areas which were classifies as Nearby sites (n = 946 sampling sites) >3 km unprotected	1 and 2-3 km, >3 km unprotected	3	Combined	4	8 Invasive & other problematic species, genes & diseases; 9 Pollution; HFI; Other: Fragmentation	8 Invasive & other problematic species, genes & diseases; 9 Pollution; Human footprint; LULC	HFI, Fragmentation, Pollution, Invasive species	Among geographical, climate and anthropogenic landscape factors, Protected, Contiguous, Nearby, and Unprotected sites showed no significant differences of human footprint levels (p > 0.05; Figure 2A)	Human footprint	NA		NA		Neutral	Our results showed that the anthropogenic impacts (i.e., human footprint, animal farming and water eutrophication) within the PAs were not significantly lesser than outside areas where protection measures are not applied.	NA		NA		NA		No	Results showed that PAs did not guarantee less anthropogenic impacts and higher fish species richness than outside PAs, suggesting that PAs are not a panacea for anthropogenic pressures and safeguarding fish diversity	NA		No	LULCC	NA		NA
117	Evaluating heterogeneous conservation effects of forest protection in Indonesia	Inside - Outside						Single	1	Babile Elephant Sanctuary			Non reported		No	No	1970	Not mentioned			Single	1	1 Residential & commercial development	1 Residential & commercial development	Urbanization: Residential development	From 2006 to 2017 the number of illegal houses in the Sanctuary increased from 18k to 50k, of which 32k were in the area in which elephants range. This settlement, coupled with high demand for natural resources, has resulted in significant habitat destruction and could also have exacerbated human‰ÛÒelephant conflict	Urbanization	Increased	Table 1	Increased	Table 1	No	Uncontrolled settlement inside the Babile Elephant Sanctuary has been ongoing since the 1970	NA		NA		Yes		No	Significant habitat destruction and could also have exacerbated human‰ÛÒelephant conflict	NA		No
113	Does the Establishment of Sustainable Use Reserves Affect Fire Management in the Humid Tropics?	Inside - Outside						Multiple	7		National park	National park	Non reported		Yes	Non reported	1999 - 2004	Not mentioned	NA	Not specified	Single	1	5.3 Logging & wood harvesting	5.3 Logging & wood harvesting	Deforestation	National average effect of protection preserves an additional 1.1% of forest cover; however the effect of individual parks range from a decrease of 3.4% to an increase of 5.3% and the effect of most parks differ from the national average	Deforestation	NA		NA		Neutral	The national average effect of protection preserves an additional 1.1% of forest cover;	NA		NA		NA		Partially	ATT estimates for Indonesia mask a great deal of variation in the effective- ness of individual PAs in different parts of the country	Yes		No
112	Landscape Changes in PAs in Poland	PA - Management interv.	Difference in fire density before and after reserve creation	PA - PA categories	Control buffer area of 10km		Shift in fire management practices occurred following reserve creation	Multiple	49	NA	Sustainable use reserves	Sustainable use reserves	Non reported	NA	Non reported	Non reported	2004 / 2006	Not mentioned	10 km	10	Single	1	7.1 Fire & fire suppression	7.1 Fire & fire suppression	Fire	Reserve creation had no discernible impact on fire density, and that fires were less prevalent in SURs due to their characteristics of sparser human settlement and remoteness, timing of fires in relation to rainfall, indicative of local fire management and adherence to environmental law, did not improve following SUR creation	Fire	Neutral	Reserve creation did not induce any shift towards improved fire management	Increased	The regression model indicated a significantly higher incidence of fires outside the reserve	Yes		NA		NA	NA	NA	NA	No	Although hotspot data indicated that SURs experienced a lower spatial density of fires than the surrounding landscape, our analysis using both spatial density measures and an area offset measure, suggests that these differences were not related to reserve creation or institutional design (i.e. RESEXs or PAE), but instead to the very different landscape contexts (settlement and accessibility) in w…	Yes	PAEs higher threat than RESEX	No
105	Relating Country-Level Governance and Tree Cover Loss in Sub-Saharan African PAs: Identifying Knowledge Gaps and a More Nuanced Perspective	PA - PA buffer		PA - PA categories				Multiple - Mixed types			National parks, nature reserves, landscape parks, Natura 2000 sites	National parks, nature reserves, landscape parks, Natura 2000 sites	Mixed		Yes	Non reported		Yes	1 km	1	Multiple	3	1 Residential & commercial development; 2 Agriculture & aquaculture; 5.3 Logging & wood harvesting	1 Residential & commercial development; 2 Agriculture & aquaculture; 5.3 Logging & wood harvesting	Urbanization; Agriculture; Deforestation	The changes in PAs were usually smaller than in the surrounding buffer zones, which may indicate their effectiveness. The exception was the areas of the European Natura 2000 network. The scale of land-cover flows (LCFs) changed within particular forms of PAs, though afforestation and deforestation predominating in all area types. National reserves and parks were the most stable in terms of land c…	Deforestation	Decreased	Forest +145	Decreased	83	Yes		Yes	PAs more effective than n2k sites	NA		NA		Yes	generally effective at limiting land use changes compared to surrounding areas, though threats like urban sprawl are increasing around PA boundaries	No		No	Agriculture	Decreased	-244	Decreased	-132
102	Indicators for Assessing Habitat Values and Pressures for PAs-An Integrated Habitat and Land Cover Change Approach for the Udzungwa Mountains National Park in United Republic of Tanzania	PA - Management interv.	Governance types					Multiple - Mixed types	5797	NA	NA	NA	Mixed	Mixed	Yes	Non reported	By 2008	Not mentioned	NA	Not specified	Single	1	5.3 Logging & wood harvesting	5.3 Logging & wood harvesting	Deforestation	While tree cover loss was correlated with overall governance across countries after considering environmental governance, the lack of a strong wider correlation could mean that country-level governance in the conventional terms measured by the IIAG is not overall a strong determinant of tree cover loss in PAs	Deforestation	Increased	Although tree cover was lost in close to all countries‰Ûª PAs, the distribution of the annual loss rate is highly skewed: with a mean of 0.56%, 20 of the 33 the countries had a tree cover loss rate below 0.5%, 8 between 0.5 and 1%, 4 between 1 and 2% and only Benin above 2%	NA	NA	NA	NA	NA		Yes	HDI score was significantly negatively correlated with the rate of tree cover loss in PAs, with tree cover loss in PAs decreasing with an increase in welfare, education, and health. There was also a significant positive correlation between GDP and tree cover loss rates in countries‰Ûª PA	NA		Partially	Better environmental governance can partially, though not completely, reduce the negative association between overall governance and tree cover loss in PAs	NA	NA	No
98	Assessing the role of PAs in the land-use change dynamics of a biodiversity hotspot	PA - PA buffer	UMNP vs surrounding 20 km buffer		NA			Single	1	Udzungwa Mountains National Park	National park	National park	High	NA	Non reported	Non reported	1992	Not mentioned	20 km	20	Multiple	4	1 Residential & commercial development; 2 Agriculture & aquaculture; 5.3 Logging & wood harvesting; LULC	1 Residential & commercial development; 2 Agriculture & aquaculture; 5.3 Logging & wood harvesting; LULC	LULCC, urbanization, agriculture, deforestation (Logging, fire)	UMNP has not suffered from relevant human activities during the study period. The natural vegetation area has remained stable around 1780 km2. In the surrounding 20 km buffer area and the connecting corridors, however, the anthropogenic impact has been strong. Artificially built up areas increased by 14.24% over the last 20 years and the agriculture area increased from 11% in 1990 to 30% in the y…	LULCC	Neutral	The LULCC analysis demonstrates that the natural areas inside the park did not suffer reduction in the two decades up to 2010	Increased	Artificial land in the 20 km buffer surrounding the PA has increased from 33.7 km2 to 38.5 km2 (14.24%) in 20 years	NA		NA		NA		NA	NA	Partially	The mountainous topography makes this region less accessible for agriculture development	NA	NA	No	Agriculture	NA		Increased	agricultural land represented 11% of the total buffer area in 1990, which increased to 30% by 2010.
96	Landscape fragmentation of the Natura 2000 network and its surrounding areas	PA - PA buffer		PA - PA categories				Multiple - Mixed types	3	Area de ProtecåüaèÏo Ambiental das Ilhas e Vaå«rzeas do Rio Paranaå« (IVRP hereafter); Parque Nacional de Ilha Grande (PNIG); Parque Estadual das Vaå«rzeas do Rio Ivinhema (PEVRI)	IPA (IUCN II) SUA ( IUCN V - VI)	IPA (IUCN II) SUA ( IUCN V - VI)	Mixed		Yes	Non reported	1998	Yes	50 km	50	Multiple	2	2 Agriculture & aquaculture; 5.3 Logging & wood harvesting	2 Agriculture & aquaculture; 5.3 Logging & wood harvesting	Deforestation, Agriculture, (mentions losses in wetland and grasslands but not extracted)	Despite the increasing landscape anthropization, the PAs seemed to relieve the general change process, protecting natural areas mainly from agricultural expansion. Also more restricted protection led to less human-induced changes	Deforestation	In data extraction		In data extraction		In data extraction		Yes	more restricted protection led to less human-induced change					Partially	More restricted protection led to less human-induced change	In data extraction		Yes
94	Biological quality of running waters in PAs: the influence of size and land use	PA - PA buffer						Multiple	15390	WDPA 2019	N2k	N2k	Mixed		Non reported	Non reported	< 2019	Not mentioned	5 km	5	Single	1	LULC	LULC	LULCC: Habitat fragmentation	Our results show a strong correlation (R2 = 0.78) between fragmentation (seff) within and around N2k sites. This result applies to all biogeographical regions in Europe. Only a narrow majority (58.5%) of N2k sites are less fragmented than their surroundings	LULCC	NA	Most N2k sites and their surroundings show a medium level of fragmentation	NA		Neutral	58.5% of all N2k sites are less fragmented than their surrounding. Surroundings of N2k sites are mostly within the same fragmentation category as N2k sites themselve	NA		NA		NA		No	Despite their protected status, our results show that N2k sites are very fragmented. Moreover, fragmentation within N2k sites strongly correlates with the fragmentation of their surroundings.	NA		No
92	Combining historical aerial photography with machine learning to map landscape change impacts on dry grasslands in the Central Alps	PA - PA buffer						Multiple	19				Non reported		Non reported	Non reported		Not mentioned	Control sites outside the PAs were randomly selected either upstream or downstream of the area, 1.0‰ÛÒ2.0 km from its boundaries	2	Single	1	9 Pollution	9 Pollution	Water pollution	On average, the 18 study sites inside PAs had biological quality similar to external control sites. In the PAs, the biological quality of streams was higher than for the same streams in the surrounding territory provided that anthropogenic changes were fewer.	Pollution	Neutral	Biological quality of streams within the PAs was not better than in the control sites of the same streams, regardless of their upstream or downstream position	Neutral		Neutral		NA		NA		NA		No	degree of landscape anthropisation at both local and regional scales appears to be the main factor related to stream water quality	NA		No
89	Effectiveness of Federal PAs in the Preservation of Mangrove Forests on the Coast of the State of Paraiba, Brazil	Inside - Outside						Multiple	5		N2k	N2k	Non reported		Yes	Non reported		Not mentioned			Single	1	LULC	LULC	LULCC	Three main processes related to a changing extent in grassland habitat prevail: (i) agricultural intensification, (ii) settlement expansion at the valley bottom and (iii) forest expansion (afforestation and encroachment due to decreasing pasture activities) on the valley slopes. The remaining grassland habitat is increasingly isolated and fragmented, leaving only few core areas of dry grassland, …	LULCC	NA		NA		Yes	Furthermore, the magnitude of change showed that grassland extent was tendentially better preserved under protection. Especially protected sites with grazing management appeared better preserved.	NA				NA		NA		NA		No
86	Effectiveness of the Qilian Mountain Nature Reserve of China in Reducing Human Impacts	PA - Management interv.						Multiple	4	1) Area of Relevant Ecological Interest (AREI) of Mangroves of the Mamanguape River, 2) Environmental Protection Area (EPA) of the Mamanguape River, 3) Restinga de Cabedelo National Forest (NATFOR), 4) AcaÌ¼-Goiana Extractive Reserve (EXTRE	Sustainable Use	Sustainable Use	Low	Federal PAs - Sustainable Use	Non reported	Non reported	IDE	Not mentioned	NA	Not specified	Single	1	5.3 Logging & wood harvesting	5.3 Logging & wood harvesting	Deforestation		Deforestation	Slightly increased	1 Increased, 2 neutral, 1 S decreased	NA		NA		NA		NA		Slightly yes		Partially		Yes		No
83	Reserves protect against deforestation fires in the Amazon	Inside - Outside						Single	1	Qilian Mountain Nature Reserve	Nature reserve	Nature reserve	Non reported		Yes	No	1988 (2014)	Yes	A peripheral buffer zone equal to the area of the nature reserve was made outward around the boundary of the nature reserve	Not specified	Combined	1	HFI	Human footprint	HFI	The HF value outside the QMNR have always been greater than those inside the reserve, and both of them show an increasing trend for 1980‰ÛÒ2020 (Figure 2). Additionally, the increasing tendency of HF value inside and outside the reserve did not change around the time of its establishment in 1990. After 1990, the HF value still increased inside the reserve and even faster for 2010‰ÛÒ2020 than in t…	Human footprint	Increased	Additionally, the increasing tendency of HF value inside and outside the reserve did not change around the time of its establishment in 1990. After 1990, the HF value still increased inside the reserve and even faster for 2010‰ÛÒ2020 than in the previous period	Increased		Yes	Outside the QMNR increased by 1.4488 for 1990‰ÛÒ2020	NA		NA		NA		Partially	QMNR is partially effective in reducing human impacts. The comparison between internal and external shows that the establishment of the nature reserve is effective in the north part of the middle of the nature reserve, and not effective at both ends of it, especially the northwest end	NA		No
82	Multiple anthropogenic pressures challenge the effectiveness of PAs in western United Republic of Tanzania	Inside - Outside	Reserves and unPAs	PA - PA categories		PA - Gradient		Multiple - Mixed types	53 parks, 109 limited use reserves, and 238 indigenous reserves	NA	Fully protected parks (reserves, state and national parks), limited-use areas (e.g., national forests, extractive reserves, sustainable development reserves, state forests, and state environmental protection areas), and Indigenous lands	Fully protected parks (reserves, state and national parks), limited-use areas (e.g., national forests, extractive reserves, sustainable development reserves, state forests, and state environmental protection areas), and Indigenous lands	Mixed	Fully protected parks (reserves, state and national parks), limited-use areas (national forests, extractive reserves, sustainable development reserves, state forests, and state environmental protection areas) Indigenous lands	Non reported	Non reported	NA	Not mentioned	No	No	Single	1	7.1 Fire & fire suppression	7.1 Fire & fire suppression	Fire	Fewer deforestation fires occurred within PAs than outside and the difference between protected and unPAs was greatest near roads. Even within reserves, at a given distance from roads, there were more deforestation fires in regions with high human impact than in low-impact regions. Indigenous reserves, limited-use reserves, and fully protected reserves all had fewer fires than outside areas and d…	Fire	Increased	There was a slight increasing trend in average hot pixels/100 km2 in all reserves over the ten-year period	NA		Yes	There were far fewer fires inside reserves than outside for both low- and high-impact forests	Yes	Reserve type had no significant effect	Yes		Yes	More deforestation fires in regions with high human impact than in those with low impact	No	Within reserves, at a given distance from roads, there were more deforestation fires in regions with high human impact than in those with low impact	Yes	Protected parks here also suffered few fires, likely because indigenous reserves surrounded them. In the north, there were many fires within a limited-use area. This suggests that limited-use reserves are less effective than indigenous land.	No
81	Elevated fires during COVID-19 lockdown and the vulnerability of PAs	PA - PA categories						Multiple - Mixed types	8	Katavi National Park,managed by United Republic of Tanzania National Park; Rukwa and LwafiGame Reserves, Mlele and Rungwa-River Game Con-trolled Areas, managed by the United Republic of Tanzania Wildlife Man-agement Authority; Nkamba and Msaginia ForestReserves, managed by the Tanganyika District Counciland United Republic of Tanzania Forest Service Agency, respectively; as wellas Usevia, and Sit…	Forest reserves, Game controlled area, Game reserve, National park	Forest reserves, Game controlled area, Game reserve, National park	Mixed		Yes	Non reported		Not mentioned			Single	1	2 Agriculture & aquaculture	2 Agriculture & aquaculture	Agriculture	During the surveyed period, cropland increased from 3.4 % to 9.6 % on unprotected land and from ‰ä?0.05 % to <1 % on protected land. Wildlife densities of most, but not all target species declined across the entire landscape, yet the onset of the observed wildlife declines occurred several years before the onset of cropland expansion. Logistic regression models indicated that target species prefe…	Agriculture	Increased	Cropland cover increased significantly in three (UA, FR, GCA) out of five protection categories (Figure 2a,b) of the KRE. Our results clearly show that the highest rates of encroachment occurred in areas subject to fewer restrictions to human resource utilization, particularly in UA.	Increased		Yes	Dunn's post hoc test showed that the extent of cropland cover within UA was greatest and differed significantly from other protection categories (NP,GR, FR, GCA)	No	The temporal trend of this expansion differed between protection categories, evidenced by different average annual rates of crop expansion: NP = 0.02 % increase year_x0003_1;GCA = 0.02 % increase year_x0003_1; GR = 0.03 % increase year 1; FR = 0.10 % increase year_x0003_1; and UA = 1.29 %increase year_x0003_1.	NA		NA		Partially	While multiple-use areas such as GCAs and FRs in theKatavi-Ruwka Ecosystem were relatively effective in protecting against land-use change, they were ineffective in conserving populations of large mammal species	Yes		No
80	Assessing national human footprint and implications for biodiversity conservation in Iran	PA - Management interv.	NA		NA		NA	Multiple	114	NA	NA	NA	Mixed	NA	Yes	Non reported	< 2020	Not mentioned	NA	Not specified	Single	1	7.1 Fire & fire suppression	7.1 Fire & fire suppression	Fire	Monthly excess fire anomalies by comparing observed fires with those predicted based on historical and contemporary fire and weather data for all of Madagascar‰Ûªs PAs for every month 2012‰ÛÒ2020	Fire	Increased	Unprecedented increase in fires in Madagascar‰Ûªs PAs between March and July 2020	NA	NA	NA	NA	NA	NA	NA	NA	NA	NA	Yes	Absence of management lead to a steep increase in fires	NA	NA	No
68	A global-level assessment of the effectiveness of PAs at resisting anthropogenic pressures	Inside - Outside					NA	Multiple	31 National parks (category II), 46 Wildlife refuge (category IV), 169 (VI)	NA	NA	NA	Mixed	NA	Non reported	Non reported	NA	Not mentioned	NA	Not specified	Combined	1	HFI	Human footprint	HFI	(22%) of officially protected land was under intense human pressure, mostly located in north-west and west of the country	Human footprint	Increased	Almost the entire extent of the country ([99%) is affected by at least one human pressure, and about 35% is subject to intense human pressure (HFP C 4)	NA	NA	Yes	On average, human pressure is lower inside Iran‰Ûªs PAs (mean score = 5.8) compared to unprotected land (mean score = 13.3)	No	Mean human pressure is fairly similar between category II and category VI PAs, though a greater area is under intense pressure in category VI, Category VI PAs have by far the most area under intense human pressure	NA	NA	Yes	Areas of high human pressure are concentrated in the North and North-West of the country, where the major cities and agricultural activities occur.	No	Closer distance to cities and agricultural activities poses higher threat. Failing to halt the human activities that drive biodiversity decline	Yes		No
66	COVID-19 lockdown frees wildlife to roam but increases poaching threats in Nepal	Inside - Outside						Multiple	12315	NA	All	All	Mixed	NA	Non reported	Non reported	1995 - 2017	Not mentioned	NA	Not specified	Combined	1	Other: Temporal Human Pressure Index (THPI)	Human footprint	Human population density, night light intensity, cropland cover	While many PAs show positive outcomes, strikingly we find that compared with matched unPAs, PAs have on average not reduced a compound index of pressure change over the past 15 y. Moreover, in tropical regions average pressure change from cropland conversion has increased inside PAs even more than in matched unPAs	Human footprint	Increased	6 realms: PAs experienced increased human pressure. Largest in Indomalaya (mean = 5.53, SE = 0.12), Afrotropics (mean = 2.95, SE = 0.05), and the smallest in Australasia (mean = 0.27, SE = 0.02) and the Nearctic (mean = 0.14, SE = 0.03)	Increased	Fig 2A	No	Compared with matched unPAs, PAs have on average not reduced a compound index of pressure change over the past 15 y	NA	NA	NA	NA	NA	NA	Partially	Geographical variation. Countries with high national-level development = lower pressure increase. PAs with reduction in pressure were associated with higher initial human pressure and found in countries with greater human development score	No	NA	No
61	Land cover dynamics in the Simien Mountains (Ethiopia), half a century after establishment of the National Park	PA - Management interv.	Pre-lockdown and during the lockdown					Multiple - Mixed types	20				Non reported		Non reported	Non reported		Not mentioned			Single	1	5.1 Hunting, gathering, fishing	5.1 Hunting, gathering, fishing	Hunting	Among 20 PAs investigated during the lockdown, the study found substantial increases in wildlife death in two PAs, Banke National Park, and Bardia National Park. Similarly, Chitwan National Park (CNP) and Shivapuri Nagarjun National Park (SNNP) witnessed a rise in wildlife poaching. CNP and SNNP are located close to densely populated cities and also have human settlements in their peripheries	Hunting	Increased	All forests in Nepal including community forests were under tremendous pressure from poaching and smuggling during the lockdown	NA		NA		NA		NA		Yes	Close to cities and illegal settlements inside PAs	Yes	We conclude that PAs near human settlements in Nepal have experienced a negative impact from lockdown since forest and wildlife-related crimes were significantly increased. The reduction in law enforcement and patrolling caused a surge of illegal killing of wildlife and activities disturbing wildlife	NA		No
58	Spatial and temporal deforestation dynamics in protected and unprotected dry forests: a case study from Myanmar (Burma)	Inside - Outside						Single	1	Simien Mountain National Park	National park	National park	Non reported	The SMNP was created in 1969, a period when 80% of the park was subjected to human use through livestock grazing, cultivation and settlements	Yes	Non reported	1969	Not mentioned	NA	Not specified	Single	1	5.3 Logging & wood harvesting	5.3 Logging & wood harvesting	Deforestation	increase in forest was observed in the eastern and western edge of the SMNP at Sankaber and Imet Gogo (20‰ÛÒ40%). In contrast, centrally in the SMNP (around Gich), the area covered with dense forest decreased with an estimated rate of -1.4% per decade	Deforestation	Neutral		Neutral		Neutral	The average woody vegetation change is negative (-1.8%) outside the SMNP and positive (1.4%) inside the PA. But an ANOVA test shows that this difference is not significant for all time periods (p[ 0.05). The boundary of the National Park is not significantly explaining for changes to woody vegetation in the Simien Mountains	NA		NA		NA		No	The establishment of the National Park did not induce a significant increase in woody vegetation. This can be partly explained by early colonization of marginal lands in the Kona-Sona lowlands outside the NP	No		No
55	Monitoring the light pollution changes of China's mangrove forests from 1992-2020 using nighttime light data	PA - PA buffer						Single	1	Chatthin Wildlife Sanctuary	Wildlife Sanctuary	Wildlife Sanctuary	Medium	Supports endangered species and has a history of human habitation.	Yes	Non reported	1941	Not mentioned	1 km	1	Multiple	2	2 Agriculture & aquaculture; 5.3 Logging & wood harvesting	2 Agriculture & aquaculture; 5.3 Logging & wood harvesting	Deforestation; Agriculture	Between 1973 and 2005, 62% of forest was lost at an annual rate of 1.86% in the area, while forest loss inside CWS was only 16% (0.45% annually). Based on trends found during our study period, dry forests outside CWS would not persist beyond 2019, while forests inside CWS would persist for at least another 100 years	Deforestation	Increased	forest loss inside CWS was 16%	Increased		Yes	Based on trends found during our study period, dry forests outside CWS would not persist beyond 2019, while forests inside CWS would persist for at least another 100 year	NA		NA		NA		Yes	CWS protection efforts were effective in reducing deforestation rates, although deforestation effects extended up to 2 km into the sanctuary	NA		No	Agriculture	Increased		Increased
45	PAs: mixed success in conserving East Africa's evergreen forests	Inside - Outside						Multiple - Mixed types	7	Mangrove reserves	Nature reserve	Nature reserve	High	NNRs, five of which are Ramsar sites), eleven provincial nature reserves (two of which are Ramsar sites), and twenty-nine local nature reserves	Yes	Non reported	1980 - 1997	Not mentioned			Single	1	9 Pollution	9 Pollution	Light pollution	Comparing the light pollution of mangrove forests in seven nature reserves and their corresponding provinces, we found that the polluted proportion in four nature reserves (DNNR, SMNR, BNNR, and ZMNR) was lower than the provincial average, with the remaining nature reserves seriously affected by light pollution because they were too close to cities, such as FMNR, MMNR, and FZNNR. However, from th…	Pollution	NA		Increased	The net increase of pollution proportions, the net increase of six nature reserves in addition to FZNNR was less than the provincial average	Yes	Comparing the light pollution of mangrove forests in seven nature reserves and their corresponding provinces, we found that the polluted proportion in four nature reserves (DNNR, SMNR, BNNR, and ZMNR) was lower than the provincial average	NA		NA		Yes	Proximity to cities	Yes	the establishment of nature reserves is effective in preventing the light pollution of mangroves	No		No
42	Monitoring parks through remote sensing: studies in Nepal and Honduras	PA - PA buffer		PA - PA categories				Multiple - Mixed types	1048		National parks, Nature reserves, Game parks, Forest reserve	National parks, Nature reserves, Game parks, Forest reserve	Mixed		Non reported	Non reported		Not mentioned	3 buffer zones (B01:0‰ÛÒ1 km from park edge, B15:1‰ÛÒ5 km from park edge, B510:5‰ÛÒ10 km from park edge) and in the unprotected surrounding matrix	10	Single	1	5.3 Logging & wood harvesting	5.3 Logging & wood harvesting	Deforestation	We document high variability in PA effectiveness within and between PA categories. The most successful PAs were National Parks, although only 26 out of 48 parks increased or maintained their forest area (i.e. Effective parks). Forest Reserves (Ineffective parks, i.e. parks that lose forest from within boundaries: 204 out of 337), Nature Reserves (six out of 12) and Game Parks (24 out of 26) were …	Deforestation	Increased		Increased	Between 2001 and 2009, forest cover in East Africa decreased in all countries, except the Southern Sudan region (Figure 1), and most severely in the (previously) forest-rich countries of Uganda and Rwanda.	Yes	Forest decrease was strongest outside PAs with a decrease of 17,167 km2 (29.3%) over the eight year period.	Yes	Forest conservation success differed considerably within protection categories: nearly 50% of National Parks, 50% of Nature Reserves, 61% of Forest Reserves and 92% of Game Parks were Ineffective. The most successful PAs were National Parks, although only 26 out of 48 parks increased or maintained their forest area (i.e. Effective parks). Forest Reserves (Ineffective parks, i.e. parks that lose f…	NA	NP the most effective. Indicates significantly higher areal forest loss from Game Parks compared to Forest Reserves and National Parks (Pbonf ,0.01), and significantly higher relative forest loss compared to National Parks, Nature Reserves and Forest Reserves (Pbonf ,0.01)	NA		Partially	Forest conservation success differed considerably within protection categories: nearly 50% of National Parks, 50% of Nature Reserves, 61% of Forest Reserves and 92% of Game Parks were Ineffective (Table 2),	Yes		No
40	The co-management approach has positive impacts on mangrove conservation: evidence from the mono transboundary biosphere reserve (Togo-Benin), West Africa	PA - PA buffer		PA - Management interv.				Single	2				High	1: established above 1800 m elevation with an area of approximately 165 km2 within which agriculture and industry was prohibited. 2:	Yes	Other: 1: No 2: Yes	IDE	Yes	5 km	5	Single	1	5.3 Logging & wood harvesting	5.3 Logging & wood harvesting	Deforestation		Deforestation	In data extraction		In data extraction		In data extraction		NA		NA		NA		NA		Yes		Yes
34	Dynamic threats of nighttime light-represented human activities to giant pandas and their habitat	PA - Management interv.	Comanagement	PA - Gradient				Single	1	Mono transboundary biosphere reserve (MTBR)	Transboundary biosphere reserve	Transboundary biosphere reserve	Non reported		Yes	Yes	2017	Not mentioned	NA	Not specified	Combined	4	5.1 Hunting, gathering, fishing ; 5.3 Logging & wood harvesting; 7.1 Fire & fire suppression; 9 Pollution	5.1 Hunting, gathering, fishing ; 5.3 Logging & wood harvesting; 7.1 Fire & fire suppression; 9 Pollution	Fishing, pollution, mangrove over-harvesting, bushfire, mangrove clearing and change in salinity	Comanagement approach has lowered anthropogenic stressors to mangroves in the reserve. Under the co-management approach, all the mangroves located in the Benin side of the reserve are identified as under low risk whereas 42% of the mangrove cover are considered under low risk and 58% under medium risk in Togo. Local perception also portrayed the reduction of mangrove degradation in the study site…	Multiple threats	Decreased	The majority (78,2% in Benin and 85,8% in Togo) reported a drastic and somewhat reduction of human-led pressures on mangroves after comanagement	NA	NA	NA	NA	NA	NA	NA	NA	NA	NA	Yes	Positive perceived impact of the comanagement on mangrove protection	NA	NA	No
33	Fire Response to Local Climate Variability: Huascaran National Park, Peru	Inside - Outside						Multiple	Non reported		Natural reserve	Natural reserve	Non reported	Non reported	Non reported	Non reported		Not mentioned	Non reported	Not specified	Single	1	LULC	LULC	Nighttime light	Intensity and range of the nighttime light around panda habitat had increased significantly from 2000 to 2020. The nighttime light intensity inside the natural reserves is significantly lower than outside, and it becomes more obvious over time. The intensity and range of nighttime light inside the natural reserves first increased and then decreased during the two decades, indicating that the prot…	LULCC	Decreased	The growth rate of nighttime light intensity inside natural reserves was 120% of the average level in the study area from 2000 to 2010, but the effective protection made it fall to 17.9% from 2000 to 2020	Increased	From 2000 to 2020, the growth rate of the nighttime light area inside natural reserves was only 5.7% of the growth rate over the whole study area	Yes	The intensity of nighttime light inside the giant panda natural reserves was much lower than outside, and we found it became more obvious over time: the average intensity of nighttime light inside the natural reserves was 11.0% (2000), 6.5% (2010) and 1.1% (2020) of the average level in the whole study area, respectively	NA		NA		NA		Yes	The intensity and range of nighttime light inside the natural reserves first increased and then decreased during the two decades, indicating that the protection inside the natural reserves effectively reversed the rapid increase in human activities in the previous decade	No		No
30	PAs have remarkable spillover effects on forest conservation on the Qinghai‰ÛTibet Plateau	PA - PA buffer						Single	1	HuascarÌÁn National Park	National park	National park	Non reported		Non reported	Non reported	1975	Yes		Not specified	Single	1	7.1 Fire & fire suppression	7.1 Fire & fire suppression	Fire		Fire	Slightly increased	The proportion of the total area burned between 2002 and 2014 for both the HNP and the BZ (total CB) was 0.81% and 2.03%, respectively.	Increased	Cyclical	Yes	Most years, the BZ experiences more area burned than the HNP	NA		NA		NA		No	Pattern in fire occurrence and seasonality with peak fire activity during the Peruvian winter (dry season	NA		No
29	Global PA impacts	Inside - Outside	Control area (CA, in a 20‰ÛÒ120-km buffer around the NR)	PA - PA buffer	a buffer zone (in a 20-km buffer around the NR	PA - Management interv.		Multiple - Mixed types	54		Nature reserve	Nature reserve	High		Non reported	Non reported	< 2021	Not mentioned	20 km	20	Single	1	5.3 Logging & wood harvesting	5.3 Logging & wood harvesting	Deforestation	75.9% of the NRs were effective in preventing deforestation within their boundaries. NRs with different properties showed similar performance on forest conservation. Spillover effects were heterogeneous around NRs. One hundred and twenty-two buffer zones had positive spillover ranging from 0.1% to 5.3%. One hundred and nineteen buffer zones had leakages from ‰öÕ8.84% to ‰öÕ0.1%.	Deforestation	Decreased	75.9% of the NRs were effective in preventing deforestation. Positive E value ranging from 0.1% to 5%, indicating successful forest conservation	NA		Yes	NRs showed better performance in forest conservation compared to control areas	NA		NA		NA		Yes	Most PAs performed well in forest conservation	No		No
26	Natura 2000 Areas, Road, Railway, Water, and Ecological Networks May Provide Pathways for Biological Invasion: A Country Scale Analysis	Inside - Outside		PA - PA categories				Multiple - Mixed types		WDPA	IUCN I - VI	IUCN I - VI	Mixed		Non reported	Non reported		Not mentioned	10 km	10	Single	1	5.3 Logging & wood harvesting	5.3 Logging & wood harvesting	Deforestation	Post-match estimates usually indicate positive PA land-cover impacts (i.e. most countries fall in the upper-rightquadrants in •Âgure 2a‰ÛÒ c). That is consistent with reducedforest clearing: 75 per cent of countries showed positiveland-cover PA impacts for 2000; 76 per cent did for2005; and 67 per cent showed gains using the noisierestimate of 2000‰ÛÒ 2005 land-cover change	Deforestation	Decreased	Specifically, 75% of countries showed positive land-cover impacts for the year 2000, 76% for 2005, and 67% for the change between 2000 and 2005, suggesting a reduction in forest clearing within PAs over time	NA		Yes	Reduced forest clearance	Yes	Reduction in estimated PA impacts from pre- to post-match is greater for category I and II parks than forcategory III ‰ÛÒVI parks matches the expectations fromrecent results that category I and II PAs are most biasedin terms of land characteristics	NA		NA		Partially	PAs do have a significant role in reducing land cover conversion, but this effectiveness is nuanced by various factors. impacts vary considerably within a country (i.e. across a landscape): protection achieves less on lands far from roads, far from cities and on steeper slope	NA		No
23	Changes in the human footprint in and around Indonesia's terrestrial national parks between 2012 and 2017	Inside - Outside		PA - PA categories	HEN and N2k			Multiple - Mixed types		Hungarian Ecological Network, and N2k sites	Biosphere reserve, Natura 2000	Biosphere reserve, Natura 2000	Medium	HEN includes core (Biosphere reseve), buffer and ecological corridor.	Yes	Non reported	NA	Yes	NA	Not specified	Single	1	8 Invasive & other problematic species, genes & diseases	8 Invasive & other problematic species, genes & diseases	Invasive species	Occurrence of some investigated invasive plants was over-represented in the HEN and within Natura 2000 areas of Hungary compared to non-infected points	Invasive species	NA		NA		No	Within the core area of the HEN, only A. syriaca (1/5) has a lower infection rate than non-infected points. This suggests that highly protected nature onservation areas (e.g., national parks) are more infected with A. altissima, Solidago spp., and R. pseudoacacia than areas outside PAs (Table 2)	No		No	Both PAs types were ineffective	NA		No	Not effective PAs	Yes		No
18	Deforestation in Continental Ecuador with a Focus on PAs	PA - PA buffer	NA		NA		NA	Multiple	43	NA	National park	National park	High	NA	Non reported	Non reported	< 2012	Not mentioned	10 km	10	Combined	1	HFI	Human footprint	Road and access, human population, Land transformation (agriculture, industrial plantations, built-up environment and other land uses)	the HF has changed in and around NPs in Indonesia, even in a period of only 5 years. Between 2012 and 2017, all bioregions experienced average increases in their HFs, both inside parks as well as in the 10-km buffer areas outside the parks.	Human footprint	Increased	37 out of 43 NPs experienced an increase in the HF, ranging from 0.4 to 77.3%	Increased	2012 and 2017, all bioregions experienced average increases in their HFs, both inside parks as well as in the 10-km buffer areas outside the parks	No	On average, more bioregions in Indonesia experienced higher increases of HFs inside NP compared to HFs in the 10-km buffer areas	NA	NA	NA	NA	Yes	Strongly impacted by infrastructure development, especially roads.	Partially	increased HFs inside NPs follow what is happening in the 10 km buffer areas.	NA	NA	No
16	Rapid and large changes in coastal wetland structure in China's four major river deltas	PA - PA categories		PA - PA buffer				Multiple - Mixed types	72		IUCN (High, Low and Mixed)	IUCN (High, Low and Mixed)	Mixed		Non reported	Non reported	1968 - 2018	Not mentioned	5 - 10 km	10	Multiple	2	5.3 Logging & wood harvesting; LULCC	5.3 Logging & wood harvesting; LULC	Deforestation, Fragmentation	Between 1990 and 2018, approximately 4% of the accumulated deforestation occurred within the boundaries of SNAP, and up to 25.5% in buffer zones	Deforestation	In data extraction		In data extraction		In data extraction	# of deforestation patches were higher in buffer zones, meaning higher deforestation outside PAs	No	PAs and their buffer zones with higher protection status were identified as the most deforested areas among SNAP.	NA	Among the PAs of SNAP, those with the highest protection level (IUCN eq. cat. Ia/b and II, including buffer zones) had the highest share of national deforestation between 1990 and 2018	NA		In data extraction	PAs of SNAP are generally effective at preventing deforestation within their boundaries. However, forest fragmentation is higher inside PAs with higher protection status than areas of lower protection status.	Yes		Yes
15	PA Effectiveness in Reducing Conversion in a Rapidly Vanishing Ecosystem: The Brazilian Cerrado	PA - Management interv.						Multiple	4	Liaoning Liaohe Estuary NNR - 1988 - Ramsar site (2005) YRD NNR (YRPA) - 1992 - Ramsar 2013 Shanghai Chongming Dongtan Bird NNR (CMPA) - 2005 - Ramsar 2002 Shanghai Jiuduansha Wetland National Nature Reserve of the YtRD - 2005	National Nature Reserves	National Nature Reserves	Non reported		Yes	Non reported	1992 - 2005	Not mentioned			Multiple	2	8 Invasive & other problematic species, genes & diseases; LULC	8 Invasive & other problematic species, genes & diseases; LULC	LULCC: Land reclamation; invasive species	PAs were effective in halting the decreasing trends in coastal wetland areas and slowing the expansion of reclamation, but the success of PAs is being counteracted by soaring exotic plant invasions	LULCC	Decreased	Our findings also supported that the tidal vegetation and tidal flat areas in these PAs had stable or increasing trends after the establishment. Reclaimed areas have recently experienced significant decreases in these PAs	NA		Yes	More effective with the intervention	NA		NA		NA		Partially	Strong effectiveness of PAs in controlling the expansion of reclaimed areas. Spartina-invaded areas in four PAs were much larger after Ramsar sites were designated	NA		No	Invasive species	Increased	The areas invaded by Spartina increased substantially in the four PAs. Furthermore, the Spartina-invaded areas in four PAs were much larger after Ramsar sites were designated	NA
12	Land-cover changes in and around a National Park in a mountain landscape in the Pyrenees	PA - PA buffer	PAs vs matched unprotected sites	Other: PA - PA categories;PA - Other LU types	SPs: IUCN I - IV MUs: IUCN V - VI Indigenous lands		NA	Multiple - Mixed types	SPs: 62 MUs: 44 Indigenous lands: 62	NA	SPs: IUCN I - IV MUs: IUCN V - VI Indigenous lands	SPs: IUCN I - IV MUs: IUCN V - VI Indigenous lands	Mixed	All levels of protection	Non reported	Non reported	< 1992	Not mentioned	10 km	10	Combined	1	LULC	LULC	LULCC	Both PAs types and ILs experienced lower habitat conversion during this period than matched unprotected sites. Judging from their matched unprotected sites, strictly PAs had similar levels of baseline conversion to multiple-use PAs but were more effective at reducing it	LULCC	Decreased	From 2002 to 2009 SNUC PAs in Cerrado had a positive absolute effect overall (Figure 2a, Wilcoxon test, V = 3844, N = 106, P < 0.001), and so did each of their two major subsets‰ÛÓSPs (V = 1431, N = 62, P < 0.001) and MUs (V = 607, N = 44, P < 0.001).	Decreased	The 10 km buffers surrounding PAs did not appear to experience higher conversion than did their matched unprotected site	Yes	PAs in Cerrado had a positive absolute effect overall (Wilcoxon test, V = 3844, N = 106, P < 0.001), and so did each of their two major subsets‰ÛÓSPs (V = 1431, N = 62, P < 0.001) and MUs (V = 607, N = 44, P < 0.001). This effect was generally larger for SPs than for MUs	Yes	Judging from their matched unprotected sites, strictly PAs had similar levels of baseline conversion to multiple-use PAs, but were more effective at reducing it.	NA		NA		Yes	Similar baselines but strict reserves were more effective than MU	Yes	Indigenous land, SP, MU	No
10	Assessment of threat status and management effectiveness in Kakamega forest, Kenya	Inside - Outside	Peripheral area		NA		NA	Single	1	Aiguestortes i Estany de Sant Maurici NP	National park	National park	Non reported	Located in the high mountain domain of the Pyrenees massif	No	Non reported	1950	Not mentioned	NA	Not specified	Single	1	5.3 Logging & wood harvesting	5.3 Logging & wood harvesting	Deforestation	In the two areas with different protection level, dense forests increased throughout the period because of the reduction in forestry activities. The peripheral area showed a higher rate of forest-cover change from 1957 to 2005 compared to the national Park. This higher increase in forest cover in the peripheral area could be related to a higher proportion in the National Park of screes and rocky …	Deforestation	NA	The percentage of forest cover in the whole area increased from 28.8 å± 0.4% (mean å± SE) in 1957 to 33.5 å± 0.4% in 2005	Neutral	More quadrats in the peripheral area than in the National Park that still had the same land-cover type as 50 years ago in 1957	No	More quadrats in the peripheral area than in the National Park that, 48 years later, had the same land-cover type as in å?1957	NA	NA	NA	NA	NA	NA	No	Forest-cover change decreased with both elevation and distance to villages	No	NA	No
9	The role of PAs in mitigating human impact in the world's last wilderness areas	PA - Management interv.	Comparison between different management regimes (Forest Department vs. Kenya Wildlife Service)	PA - PA categories	For protection status, we distinguished between sites with high protection priority i.e., National or Nature Reserves (n = 10) and sites with low protection priority i.e., Forest Reserves (n = 12)		NA	Multiple	22 sites - Sites being managed by different institutions KWS (n = 6) and the FD (n = 16)		Forest reserve / Nature reserve	Forest reserve / Nature reserve	Mixed		Yes	Non reported		Not mentioned			Single	1	5.3 Logging & wood harvesting	5.3 Logging & wood harvesting	Deforestation	Illegal logging was significantly lower in Kenya Wildlife Service managed sites and within highly protected National and Nature Reserves compared to less protected Forest Reserves, indicating management effectiveness and protection status influence on Kakamega Forest.	Deforestation	NA	We could not find differences in the number of logged trees for past logging (i.e. more than 20 years ago) between different sites indicating that logging levels in the past might have been similar throughout Kakamega Fores	NA	NA	NA	NA	Yes	Logging was lower within highly protected National and Nature Reserves as compared to high logging within the less protected Forest Reserves	Yes	NA	NA	NA	Yes	The number of trees logged illegally in the last 20 years was significantly lower at sites managed by the Kenya Wildlife Service	Yes	fewer trees logged at sites managed by the KWS and with high protection priority	No
8	Global protected-area coverage and human pressure on tidal flats	Inside - Outside	A quasi-experimental approach (matching) ‰Ûªto compare the change within PAs vs. the change outside, within each of earth‰Ûªs terrestrial biomes.	PA - PA categories	We assess whether or not the effectiveness of PAs depends on their IUCN category; in other words, we examine whether areas with more strict protection status (i.e., IUCN categories I to II) are more successful in reducing impact when compared to areas with a less strict status (III to VI) or no status at all			Multiple	52281	NA	All IUCN categories	All IUCN categories	Mixed	WDPA - Grouped by: (a) I‰ÛÒII; (b) III‰ÛÒVI; and (c) no assigned IUCN category	Non reported	Non reported	< 1993	Not mentioned	NA	Not specified	Combined	1	HFI	Human footprint	HFI	Overall increase in human footprint higher in tropical than temperate regions. The increase was lower inside PAs than outside, in half of the fourteen biomes examined the differences were insignificant. Although reasons varied, PAs alone are unlikely to be successful in protecting wilderness areas	Human footprint	Increased	The average increase in human footprint inside PAs was 0.20	Increased	The average increase of human footprint outside PAs was 0.32 (sd = 0.30).	Yes	NA	Neutral	There was no statistical difference between the increases in human footprint within the three types of PAs, i.e., (a) strict; (b) non-strict; and (c) no IUCN category (Kruskal‰ÛÒWallis Chi squared = 1.65, df = 2, p value = 0.4;	NA		NA		Partially	PAs generally mitigate human impact within wild areas, but the degree of effectiveness varies across different biomes. While PAs typically have lower human footprints compared to unPAs, this trend is not universal. In some biomes, such as boreal forests and tundra, the difference in human impact between protected and unPAs is minimal. This is likely due to factors other than the effectiveness of …	No	Wild areas in temperate biomes (e.g., boreal forests and tundra) remain relatively free of substantial increases in intense human pressure (Table 1), while wild areas in tropical and subtropical biomes are increasingly impacted by human activities	No
6	Severe human pressures in the Sundaland biodiversity hotspot	Inside - Outside						Multiple - Mixed types	5927	WDPA			Non reported		Non reported	Non reported	< 1999	Not mentioned	NA	Not specified	Combined	1	Other: Human pressure	Human footprint	Human modification	Net change of tidal flat extent inside PAs was similar to tidal flat net change outside PAs from 1999 to 2016. Substantial shortfalls in protection of tidal flats occurred across Asia, where large intertidal extents coincided with high to very high human pressure (HMc > 0.4‰ÛÒ1.0) and net tidal flat losses up to 86.4 km2 (95% CI 83.9‰ÛÒ89.0) occurred inside individual PAs in the study period.	Human footprint	Neutral	Our analysis of individual PAs showed that the percentage of PAs that experienced net loss (e.g., Figs. 1b, 1f, & 1g) and net gain (e.g., Figs. 1c‰ÛÒe) were similar (51.6% and 48.4% respectively), but that average gains of 1.8 km2 (1.78‰öÕ1.89 km2, 95% CI <0.01‰ÛÒ240.6 km2) were greater than average losses of 0.9 km2 (0.85‰ÛÒ0.91 km2, 95% CI < 0.01‰ÛÒ89.0)	Neutral		Neutral	From 1999 to 2016, tidal flat extent did not significantly differ within the PA network (3.2%, 95% CI ‰öÕ2.7% to 9.5%) compared with outside the PA network (‰öÕ1.3%,95% CI ‰öÕ7.0% to 4.7%)	NA		NA		Yes	Tidal flat coverage in areas with moderate to very high human pressure is below the global average, particularly in East and Southeast Asia, where rapid loss has been noted	Partially	Country governance	NA		No
5	Assessing naturalness in northern great lakes forests based on historical land-cover and vegetation changes	PA - PA categories						Multiple		WDPA 2018	National - IUCN I to VI	National - IUCN I to VI	Mixed		Non reported	Non reported	<= 1993	Not mentioned	NA	Not specified	Combined	1	HFI	Human footprint	HFI	we find that 70% of Sundaland has been heavily modified by humans. This represents a 55% increase in areas under intense human pressure since 1993. The results imply that the actual level of protection by PAs is only one-third to half of that on paper once human footprint is accounted for. While all PAs were impacted by human pressures, those managed strictly for biodiversity conservation present…	Human footprint	Increased	In 1993, on average, 70.5% å± 38.6 SD of each PA extent in Sundaland was categorized as having human footprint ‰ä´4, and this average increased to 77.9% å±34.3 SD by 2009	Increased	Overall, the Sundaland biodiversity hotspot has been subjected to intense human pressure that compromises key conservation values in the region. On average, over 70% of protected land is under intense human pressures. This far exceeds the global average of approximately 30% due to the high concentration of human activities in Sundaland (Jones et al., 2018	NA		No	The change in human pressures across PAs differed significantly (p = .005). The PA Category Ia showed the highest and a statistically significant increase (26.1%) in mean human pressure (p = .0001). The PA Categories Ib (p = .49) and VI (p = .54) experienced an increase in human pressure that was not statistically significant, whereas Categories II, III, IV and V remained stable (Figure 2a).	No		NA		No		Yes		No
4	Monitoring of organochlorine pesticides in and around Keoladeo National Park, Bharatpur, Rajasthan, India	PA - PA buffer	NA	Inside - Outside	NA		NA	Single	1	Pictured Rocks National Lakeshore	IUCN III - Natural monument	IUCN III - Natural monument	Medium	NA	Non reported	Non reported	1966	Yes	15300 ha inland buffer zone	Not specified	Single	1	5.3 Logging & wood harvesting	5.3 Logging & wood harvesting	Deforestation	Gradient in land-cover continuity from the core zone (81 % continuity) to the inland buffer zone (74 %) and the area outside the park (66 %).	Deforestation	Increased	Landscape continuity is by far the dominant trajectory over the whole study period. 73 % of the total study area remained in the same land-cover class in all three time points	Increased	However, there was a clear gradient in landscape continuity from the park core zone (81 %) to the inland buffer zone (74 %) and the area outside the park (66 %).	Yes	Gradient in land-cover continuity from the core zone (81 % continuity) to the inland buffer zone (74 %) and the area outside the park (66 %)	NA	NA	NA	NA	NA	NA	Yes	ore than half of the study area was considered as ‰Û÷‰Û÷natural virgin‰Ûª‰Ûª (no changes in land-cover and forest community type) with a higher portion within the park than in the adjacent area. he core zone showed the largest degree of similarity between pre-settlement and current times	NA	NA	No
		Inside - Outside	Soil samples inside and outside the park		NA		NA	Single	1	Keoladeo National Park	National park	National park	Non reported	NA	Non reported	Non reported	NA	Not mentioned	NA	Not specified	Single	1	9 Pollution	9 Pollution	17 agriculture pollutants OCPs		Pollution	NA		NA		Neutral	The present study indicates that the soil inside the park and outside is uniformly contaminated.	Neutral		NA		No		No	Because of the water coming from areas which are extensively used for agricultural purposes and farmers using different kinds of pesticides to protect their crops from termites and other pests.	NA		No
[truncated: 172 more columns]

## Sheet: 1.2. Extract - Reasons outcomes
ID	Title	main_outcome_reason	specific_outcome_reason	outcome_effect	Support
1	Management impacts on fire occurrence: A comparison of fire regimes of African and South American tropical savannas in different protected areas	Baseline	High threat area	Positive		in longer fire return intervals	lower percentages of burned area and fewer ignitions	when compared with Malagasy parks. In contrast	despite a similar ban on fire in Madagascar (Kull	2004)	the lessmechanized	traditional ways employed by Malagasy people to manage agriculture and pasture using fire has resulted in shorter fire return intervals	a higher percentage of burned areas and a higher number of ignitions for Ibity and Itremo	suggesting that Madagascar's fire suppression policies are less effective.
1	Management impacts on fire occurrence: A comparison of fire regimes of African and South American tropical savannas in different protected areas	Management	Local interventions, plans or policies	Positive	the parks under higher human influence suffered less burning after management interventions, while the opposite was observed for the remote Itremo. The strongly enforced fire suppression policy in Brazil (Durigan and Ratter, 2016) and the significant reduction in human activities on the SCNP (França and Ribeiro, 2008) have resulted, over 32 years, in longer fire return intervals, lower percentage…
1	Management impacts on fire occurrence: A comparison of fire regimes of African and South American tropical savannas in different protected areas	Location	Population density	Positive	Our results thus suggest an effect of population density around the parks on total burned area in both continents, as has been demonstrated in Africa where increases in population density have resulted in a decrease of burned area
2	Using nighttime lights to assess infrastructure expansion within and around protected areas in South America	Location	Accessibility	Positive	In general, the increase of infrastructure (and NTL)within PAs could be associated with urban expansion [38] in those PAs near urban areas and to mining projects[16, 39], oil and gas projects[19] and dams constructions[18] in PAs located far from large urban centers
2	Using nighttime lights to assess infrastructure expansion within and around protected areas in South America	Design	Fragmentation	Negative
2	Using nighttime lights to assess infrastructure expansion within and around protected areas in South America	Management	PA strictness	Positive	For instance, strictly protected PAs(I, II, III, and IV)were more successful in regulating infrastructure expansion than multiple-use PAs(V, VI, Others)
2	Using nighttime lights to assess infrastructure expansion within and around protected areas in South America	Design	Small size	Negative	Given that many of these PAs are small, this increase in infrastructure could increase isolation by eliminating corridors and habitat patches in the surrounding landscape
3	Differential vulnerability to biological invasions: not all protected areas (and not all invaders) are the same	Location	Accessibility	Negative	the similar number of regulated IAS registered in N2K sites and their belt zones could be explained by their recent designation, high human accessibility, and permissive management that allows low-intensity activities. However, due to the correlational nature of our study, we cannot ascribe the observed patterns to any specifc mechanism
3	Differential vulnerability to biological invasions: not all protected areas (and not all invaders) are the same	Management	PA strictness	Positive	While APAs hosted fewer regulated IAS, N2K sites did not perform better than belt zones	Others)
4	Road-effect mitigation promotes connectivity and reduces mortality at the population-level	Management	Local interventions, plans or policies	Positive	The exclusion fencing installed in Presqu'ile PP to mitigate herpetofauna road mortality significantly reduced the number of turtles and amphibians on the road compared to our control site.
5	Impacts of conservation incentives in protected areas: The case of Bolsa Floresta, Brazil	Management	Funding and resources	Positive	Conservation effects concentrate in areas near markets and at reserve boundaries, and where ex-ante deforestation pressure is relatively high
5	Impacts of conservation incentives in protected areas: The case of Bolsa Floresta, Brazil	Baseline	Low threat area	Neutral
6	Urban sprawl into Natura 2000 network over Europe	Location	Accessibility	Negative	the proximity to densely settled territories (i.e., urban clusters) was confirmed to be a major driver of urban sprawl into Natura 2000 protected areas
6	Urban sprawl into Natura 2000 network over Europe	Design	Large size	Negative
6	Urban sprawl into Natura 2000 network over Europe	Management	Local interventions, plans or policies	Positive	However, these initial plans have to be implemented to be effective, and only 30% of Natura sites under the Birds Directive and 41% of sites under the Habitats Directive had management plans in place in 2012
6	Urban sprawl into Natura 2000 network over Europe	Location	Population density	Negative	Natura sites affected most by urbanization were those surrounded by densely populated areas
6	Urban sprawl into Natura 2000 network over Europe	Design	Small size	Negative	Small Natura sites had more urban cover than large sites, but urban growth rates were highest in large Natura sites.
7	Human-climate interactions shape fire regimes in the Cerrado of SÃŒÂ£o Paulo state, Brazil	Management	Local interventions, plans or policies	Negative	Fire regimes in PA were similar to those observed in buffer zones suggesting that fire-exclusion policies do not effectively prevent fires in PA that are surrounded by an anthropic matrix where fire is often used.
8	How does the fire regime change after creating a protected area in the Brazilian Cerrado?	Location	Accessibility	Positive
8	How does the fire regime change after creating a protected area in the Brazilian Cerrado?	Design	Fragmentation	Positive
8	How does the fire regime change after creating a protected area in the Brazilian Cerrado?	Location	Population density	Positive
9	Assessment of National Parks affected by naturbanization processes in Southern Europe	Not identified
10	Compound impact of land use and extreme climate on the 2020 fire record of the Brazilian Pantanal	Design	Fragmentation	Negative	he effectiveness of the small number of PAs and ILs is jeopardized by their fragmentation and anthropogenic pressure
10	Compound impact of land use and extreme climate on the 2020 fire record of the Brazilian Pantanal	Design	Small size	Negative	Therefore, the enlargement of PAs in combination with a long-term strategy to mitigate fires are essential to prevent future disasters.
10	Compound impact of land use and extreme climate on the 2020 fire record of the Brazilian Pantanal	Baseline	Environmental conditions	Negative
11	An integrative analysis of threats affecting protected areas in a biodiversity stronghold in Southeast Mexico	Management	Lack of funding and resources	Negative	2016 annual operating budget was cut in more than a half during 2017. Moreover, the same source indicates that there are only 25 park guards to monitor the entire area of these PAs
12	Influence of settings management and protection status on recreational uses and pressures in marine protected areas	Location	Accessibility	Negative
13	Deforestation in an African biodiversity hotspot: Extent, variation and the effectiveness of protected areas	Location	Accessibility	Negative	For forest, highest conversion rates are found at mid elevations with low ruggedness, suggesting that topographic accessibility and potential for farming could be important considerations.
13	Deforestation in an African biodiversity hotspot: Extent, variation and the effectiveness of protected areas	Socioeconomic context	Areas of economic development	Negative
13	Deforestation in an African biodiversity hotspot: Extent, variation and the effectiveness of protected areas	Design	Fragmentation	Negative	As habitat fragmentation continues and as protected area boundaries become ‘‘habitat edges’’, our models also suggest that threat is likely to increase.
14	Is the Natura 2000 network effective to prevent the biological invasions?	Location	Accessibility	Negative
14	Is the Natura 2000 network effective to prevent the biological invasions?	Management	PA strictness	Neutral	Therefore, it seems that a stricter management of human pressure under additional regulations does not prevent IAS occurrence in N2000 sites
15	Worldwide increase in Artificial Light At Night around protected areas and within biodiversity hotspots	Location	Accessibility	Negative	Accessibility (High)
16	Evolving protected-area impacts in Panama: impact shifts show that plans require anticipation	Location	Accessibility	Neutral	protected lands’ elevations and slopes are considerably higher on average
16	Evolving protected-area impacts in Panama: impact shifts show that plans require anticipation	Baseline	Low threat area	Neutral	located on lands likely to face lower pressure for clearing
17	Assessing variation in the effectiveness of IUCN protected area categorisation. What remotely sensed forest integrity and human modification reveals across the major tropical forest biomes	Design	Large size	Positive	e IUCN management category allocation played a minor role in influencing the modification and forest integrity observed within PAs. Instead, PA size was the most important determinant of these variables across the different regions under consideration
17	Assessing variation in the effectiveness of IUCN protected area categorisation. What remotely sensed forest integrity and human modification reveals across the major tropical forest biomes	Management	PA strictness	Neutral
18	Continuous growth of human footprint risks compromising the benefits of protected areas on the Qinghai-Tibet Plateau	Location	Accessibility	Negative	e NRs located in less harsh climatic conditions were less affected by human activities, and they are more favourable to human settlement due to the more suitable climate conditions for human living
18	Continuous growth of human footprint risks compromising the benefits of protected areas on the Qinghai-Tibet Plateau	Baseline	High threat area	Negative
18	Continuous growth of human footprint risks compromising the benefits of protected areas on the Qinghai-Tibet Plateau	Design	Large size	Positive	The human footprint was low in large NRs and high in small ones
18	Continuous growth of human footprint risks compromising the benefits of protected areas on the Qinghai-Tibet Plateau	Location	Population density	Negative	specially in the south and southeast of the Qinghai-Tibet Plateau, was under intense human pressure.
19	Analyzing multi-temporal satellite imagery and stakeholders' perceptions to have an insight into how forest co-management is changing the protected area landscapes in Bangladesh	Governance	Governance	Neutral
20	Business as usual for the human use of Moreton Bay following marine park zoning	Management	Local interventions, plans or policies	Neutral	Prior to rezoning, few fishing vessels were found in future MNP areas and the historical fishing pressure in these areas was not high relative to similar locations nearby (with the exception of offshore reef MNP zones). Consequently, the reduction in level of fishing in most MNP zones was likely to be low, an effect further dampened by the lack of compliance within the zones
20	Business as usual for the human use of Moreton Bay following marine park zoning	Baseline	Low threat area	Neutral
21	Ecological indicators for protection impact assessment at two scales in the Bozin and Marakhil protected area, Iran	Design	Large size	Positive	patch size distribution models at this scale showed that protection did improve habitat cover inside the protected area by patch aggregation
21	Ecological indicators for protection impact assessment at two scales in the Bozin and Marakhil protected area, Iran	Location	Population density	Negative	Here, the increase in population intensity and destruction in habitat area and structure outside the protected area are correlated, because anthropogenic utilizations are the main underlying factors ofthe habitatloss in the region. B
22	Many a little makes a mickle: Cumulative land cover changes and traditional land use in the Kyro reindeer herding district, northern Finland	Baseline	High threat area	Negative
23	Characterizing land disturbance in Atewa Range Forest Reserve and Buffer Zone	Management	Lack of funding and resources	Negative	the conservation management policies were yielding very little results due to a number of policy deficiencies including low staff strength, lack oflogistics and low remuneration
24	Are MPAs effective in removing fishing pressure from benthic species and habitats?	Baseline	Low threat area	Neutral	protection has been focussed in areas that already act as natural refugia for sensitive benthic species and lie away from the majority of fishing activit
25	Land use and landscape pattern changes on the inside and outside of protected areas in urbanizing Selangor state, peninsular Malaysia	Location	Accessibility	Negative
25	Land use and landscape pattern changes on the inside and outside of protected areas in urbanizing Selangor state, peninsular Malaysia	Design	Fragmentation	Negative	The results of our study indicate a more intense land use change occurred on the inside and outside of Klang Gate and Sungai Dusun compared to Bukit Kutu. These changes could link to the increasing landscape fragmentation and hemeroby in these protected areas that necessitate the reduction of connectedness with adjacent natural habitat. When fragmentation happens, forest density and core area (i.…
25	Land use and landscape pattern changes on the inside and outside of protected areas in urbanizing Selangor state, peninsular Malaysia	Baseline	High threat area	Negative
25	Land use and landscape pattern changes on the inside and outside of protected areas in urbanizing Selangor state, peninsular Malaysia	Baseline	Low threat area	Positive
26	Human pressure dynamics in protected areas of China based on nighttime light	Socioeconomic context	Areas of economic development	Negative	The anthropogenic activities in PAs were the dominant factor for environmental degradation and wildlife losses in PAs, and the ecosystem was severely affected by economic development and urbanisation around the PAs. Some studies suggested that human density is a key determinant of environmental degradation (
27	Human footprint in Tibet: Assessing the spatial layout and effectiveness of nature reserves	Not identified
28	Effectiveness of functional zones in National Nature Reserves for the protection of forest ecosystems in China	Not identified
29	Landscape change in Southern Ecuador: An indicator-based and multi-temporal evaluation of land use and land cover in a mixed-use protected area	Not identified
30	A global assessment of the human pressure on the world's lakes	Socioeconomic context	Development index	Positive	Lakes within temperate regions, especially in North America, experienced less increase in human footprint and overall appear to be on average under lower human pressure—irrespective of the index used to measure human pressure (Fig. 1). In Europe, the human footprint had decreased in more than half of the lakes
30	A global assessment of the human pressure on the world's lakes	Management	PA strictness	Positive	he percentage of lakes within protected areas in which human footprint had increased was higher in those with no IUCN category (24.4%) or a non-strict protection level (i.e., IUCN categories III–VI; 22.9%).
30	A global assessment of the human pressure on the world's lakes	Location	Population density	Negative	the human population densities within the lakes in those regions appear to be increasing further
31	Recent land cover changes in Spain across biogeographical regions and protection levels: Implications for conservation policies	Management	PA strictness	Positive
31	Recent land cover changes in Spain across biogeographical regions and protection levels: Implications for conservation policies
32	Effectiveness in protected areas at resisting development pressures in China	Baseline	High threat area	Negative		and causes habitat loss and isolation
33	European National Parks protect their surroundings but not everywhere: A study using land use/land cover dynamics derived from CORINE Land Cover data	Design	PA age	Positive	The naturalization effect is only visible at the nearest buffer distance considered (?1 km) in those reserves that have been protected for the longest time
34	Terrestrial protected areas do not fully shield their streams from exogenous stressors	Baseline	Permeable boundaries	Neutral	We found that the water quality of streams inside the PAs mirrored the exogenous anthropogenic inputs and represented the condition of the streams in the region as a whol
35	Are ranger patrols effective in reducing poaching-related threats within protected areas?	Location	Accessibility	Negative
35	Are ranger patrols effective in reducing poaching-related threats within protected areas?	Management	Funding and resources	Positive	poaching-related threats can be effectively reduced in NNP by adding ranger posts in areas where they do not currently exist, and by increasing the number of patrols to sites where the probability of poaching activities is high
36	The sources and prevalence of anthropogenic noise in Rockfish Conservation Areas with implications for marine reserve planning	Baseline	Permeable boundaries	Neutral	We have not found evidence that Rockfish Conservation Areas (RCAs) in the Salish Sea provide consistent protection against potentially disruptive levels of anthropogenic noise compared to nearby unprotected area
37	Quantifying the effects of deforestation and fragmentation on a range-wide conservation plan for jaguars	Socioeconomic context	Development index	Positive	A full analysis of why certain protected areas were more functional than others is beyond the scope of this paper, but may be related to differential country or site level drivers such as population density, enforcement, or level of development
37	Quantifying the effects of deforestation and fragmentation on a range-wide conservation plan for jaguars	Baseline	High threat area	Negative	Compared to Numerous jaguar core areas (JCUs), forest loss was higher in corridors for both protected and unprotected sites, suggesting that human pressure on remaining forest in corridors is high regardless of protection status.
38	A twenty year GIS-based assessment of environmental sustainability of land use changes in and around protected areas of a fast developing country: Spain	Management	PA strictness	Neutral	there was a gradient in the overall environmental sustainability of LULC change processes among the four PA networks: NRs?>?SCIs?>?SPAs?>?NPs. This result adds to evidence that different PA categories perform differently according to their legal and managerial characteristics
38	A twenty year GIS-based assessment of environmental sustainability of land use changes in and around protected areas of a fast developing country: Spain
38	A twenty year GIS-based assessment of environmental sustainability of land use changes in and around protected areas of a fast developing country: Spain
38	A twenty year GIS-based assessment of environmental sustainability of land use changes in and around protected areas of a fast developing country: Spain
39	Development stressors are stronger than protected area management: A case of the Pantanos de Centla Biosphere Reserve, Mexico	Socioeconomic context	Areas of economic development	Negative
39	Development stressors are stronger than protected area management: A case of the Pantanos de Centla Biosphere Reserve, Mexico	Management	Lack of funding and resources	Negative
40	Protection status and national socio-economic context shape land conversion in and around a key transboundary protected area complex in West Africa	Socioeconomic context	Areas of economic development	Negative	Based on our results, it is clear that the WAP complex has been under increasing pressure from expansion of cropland over the past decade
40	Protection status and national socio-economic context shape land conversion in and around a key transboundary protected area complex in West Africa	Management	PA strictness	Positive	Protected areas with high protection status appear considerably more effective at preventing land conversion than other protected areas
40	Protection status and national socio-economic context shape land conversion in and around a key transboundary protected area complex in West Africa	Location	Population density	Neutral	Our results thus illustrate that rural population growth rates do not fully capture the relationships between human activity and cropland expansion
41	Assessing biological invasions in protected areas after 30 years: Revisiting nature reserves targeted by the 1980s SCOPE programme	Management	Local interventions, plans or policies	Neutral
42	What determines the effectiveness of national protected area networks?	Socioeconomic context	Areas of economic development	Negative
42	What determines the effectiveness of national protected area networks?	Socioeconomic context	Development index	Positive
42	What determines the effectiveness of national protected area networks?	Governance	Governance	Positive
42	What determines the effectiveness of national protected area networks?	Management	PA strictness	Positive	n average strict PAs were more effective at reducing forest loss though less strict PAs in several countries performed better. While a variety of factors including strictness of protection and PA placement contributed to PA success, PAs in countries with lower agricultural activity, higher economic growth rates and better governance were generally associated with greater PA effectiveness
43	Spatio-temporal analysis of the human footprint in South Ecuador: Influence of human pressure on ecosystems and effectiveness of protected areas	Not identified
44	Human transformation of ecosystems: Comparing protected and unprotected areas with natural baselines	Socioeconomic context	Areas of economic development	Negative	All the indicators used in this analysis are strongly related to the intensity of land cover and land use change
45	Spatial-temporal pattern analysis of landscape ecological risk assessment based on land use/land cover change in Baishuijiang National nature reserve in Gansu Province, China	Location	Accessibility	Negative	The change in cultivated land mostly happened at higher elevation and the steep areas where the agricultural activities are not suitable.
45	Spatial-temporal pattern analysis of landscape ecological risk assessment based on land use/land cover change in Baishuijiang National nature reserve in Gansu Province, China	Management	Local interventions, plans or policies	Positive	The reduction of farmland has two major reasons, one is that the protection policies restrict agricultural activities and encourage farmers to work outside the nature reserve
46	Changes in habitat quality of nature reserves in depopulating areas due to anthropogenic pressure: Evidence from Northeast China, 2000-2018	Design	Large size	Positive	arger NRs were more effective than smaller NRs.
46	Changes in habitat quality of nature reserves in depopulating areas due to anthropogenic pressure: Evidence from Northeast China, 2000-2018	Management	PA strictness	Positive	The overall performance of the national nature reserves surpasses that of the local nature reserves
46	Changes in habitat quality of nature reserves in depopulating areas due to anthropogenic pressure: Evidence from Northeast China, 2000-2018	Location	Population density	Negative	We found that in Northeast China—a typical depopulating area—the anthropogenic pressure within nature reserves has been greatly eased and the habitat quality has improved. Along with depopulation, the anthropogenic pressure in more than half of the protected area in Northeast China declined between 2000 and 2018
47	Have China's national forest reserves designated since 1990 conserved forests effectively?	Socioeconomic context	Areas of economic development	Negative
47	Have China's national forest reserves designated since 1990 conserved forests effectively?	Management	Local interventions, plans or policies	Positive	National Nature Reserve was designated in 2007 when %FC was 53.28% and experienced the greatest increase in %FC to 2019 (by 18.03%; Fig. S3), due to the enormous effort invested to regenerate and protect forests
48	Sustainability of social-ecological systems under conservation projects: Lessons from a biodiversity hotspot in western China	Management	Funding and resources	Positive
48	Sustainability of social-ecological systems under conservation projects: Lessons from a biodiversity hotspot in western China	Governance	Governance	Positive	The main reasons for the success of conservation projects in the area (especially in the slightly-disturbed zone) might be attributed to the overall consideration of ecological conservation and poverty elimination from authorities.
48	Sustainability of social-ecological systems under conservation projects: Lessons from a biodiversity hotspot in western China	Management	Local interventions, plans or policies	Positive	onservation projects had effectively facilitated vegetation recovery. ? Most farmers hold positive attitudes towards the ‘Grain-for-Green’ Program.
49	How good is your marine protected area at curbing threats?	Management	Local interventions, plans or policies	Neutral	We show that fully protected areas effectively eliminate extractive activities, whereas the intensity of artisanal and recreational fishing within partially protected areas, paradoxically, is higher than that found outside MPAs, questioning their ability at reaching conservation targets.
50	Improving protected area effectiveness through consideration of different human-pressure baselines	Management	Local interventions, plans or policies	Positive	It is most urgent to enhance the conservation effectiveness of PAs in resisting human pressure for PAs with high HPI baselines, and our results indicated that effectively. controlling illegal threats was the most important management measure. For PAs with medium HPI baselines, the most important management measure was an effective patrol and surveillance system
51	Land Use and Land Cover Dynamics Analysis of the Togodo Protected Area and Its Surroundings in Southeastern Togo, West Africa	Socioeconomic context	Areas of economic development	Negative	Meanwhile, the intensity analysis showed that the changes are becoming more intense and are mainly linked to anthropogenic pressures
52	An invasive species erodes the performance of coastal wetland protected areas	Not identified			Our study also suggests that active control of exotic species in PAs should be habitat and species specific. Compared to PAs, non-PAs with stronger human disturbances and more open habitats are typically expected to be more vulnerable to exotic species invasions
53	Protected areas in South Asia have not prevented habitat loss: a study using historical models of land-use change	Management	Ineffective management	Negative
53	Protected areas in South Asia have not prevented habitat loss: a study using historical models of land-use change	Design	Small size	Negative	is the smaller protected areas that have proved particularly vulnerable
54	Effectiveness of Africa's tropical protected areas for maintaining forest cover	Location	Accessibility	Negative	Relatively inaccessible areas had a higher probability (odds ratio >1, p < 0.001) of forest loss but only in ineffective parks, and relatively accessible areas had a higher probability of forest loss but only in effective parks.
54	Effectiveness of Africa's tropical protected areas for maintaining forest cover	Design	Large size	Positive	Smaller parks less effectively prevented forest loss inside park boundaries than larger parks (T = ?2.32, p < 0.05)
54	Effectiveness of Africa's tropical protected areas for maintaining forest cover	Design	PA age	Negative	and older parks less effectively prevented forest loss inside park boundaries than younger parks (F2,154 = ?4.11, p < 0.001).
55	Exploring the relationships between marine protected areas and invasive fish in the world's most invaded sea	Socioeconomic context	Areas of economic development	Negative	The fishing pressure exerted in unprotected areas most likely explains the significantly lower biomass of S. luridus and S. cretense compared to that found in the Zakynthos and Lampedusa MPAs, where large individuals find refuge.
55	Exploring the relationships between marine protected areas and invasive fish in the world's most invaded sea	Baseline	Environmental conditions	Negative	The establishment of invasive fishes of Indo-Pacific origins (often thermophilic species) appears to be limited by the low temperatures in the western and northern parts of the Mediterranean
56	Correlates of long-term land-cover change and protected area performance at priority conservation sites in Africa	Location	Accessibility	Negative
56	Correlates of long-term land-cover change and protected area performance at priority conservation sites in Africa	Location	Population density	Positive
57	The last frontiers of wilderness: Tracking loss of intact forest landscapes from 2000 to 2013	Socioeconomic context	Areas of economic development	Negative
57	The last frontiers of wilderness: Tracking loss of intact forest landscapes from 2000 to 2013	Management	PA strictness	Neutral	Protected areas (International Union for Conservation of Nature categories I to III) were found to have a positive effect in slowing the reduction of IFL area from timber harvesting but were less effective in limiting agricultural expansion
58	Mapping change in human pressure globally on land and within protected areas	Socioeconomic context	Development index	Positive	igh HDI values correlated with greater reductions in pressure across protected areas
58	Mapping change in human pressure globally on land and within protected areas	Design	PA age	Negative	while increasing age of the protected area correlated with increases in pressure
58	Mapping change in human pressure globally on land and within protected areas	Management	PA strictness	Positive	nly wilderness areas and natural monuments (management categories Ib and III) exhibited decreases in pressure. Protected areas not assigned any category exhibited the greatest increases.
59	Tracking the response of industrial fishing fleets to large marine protected areas in the Pacific Ocean	Management	Local interventions, plans or policies	Positive	fter their implementation, all 5 MPAs successfully kept industrial fishing effort exceptionally low. Detected fishing effort was already low in 4 of the 5 large MPAs prior to MPA implementation,
59	Tracking the response of industrial fishing fleets to large marine protected areas in the Pacific Ocean	Baseline	Low threat area	Neutral	Our results suggest that these large MPAs may present major conservation opportunities in relatively intact ecosystems with low immediate impact to industrial fisheries, but the large MPAs we considered often did not significantly reduce fishing effort because baseline fishing was typically low.
60	Size-dependent resistance of protected areas to land-use change	Design	Large size	Positive	Our results suggest that small parks are not going to be viable in the long term if they are considered as islands surrounded by a ‘human-dominated ocean’
61	Southeast Asian protected areas are effective in conserving forest cover and forest carbon stocks compared to unprotected areas	Management	Local interventions, plans or policies	Positive	rotected areas that had completed management reporting using the Management Effectiveness Tracking Tool (METT) conserved significantly more forest cover and forest carbon stocks than those that had not.
62	Indigenous, colonist, and government Impacts on Nicaragua's Bosawas Reserve	Governance	Indigenous communities	Positive	Our results show that indigenous common-property institutions and indigenous defense of homeland have been powerful factors in protecting the forests of Bosawas and that the difficult evolution of a nested cross-scale governance system in Bosawas-under pressure from indigenous peoples-is probably the key to the forest's survival thus far.
62	Indigenous, colonist, and government Impacts on Nicaragua's Bosawas Reserve	Management	Ineffective management	Negative	It seems that the Nicaraguan government has not proved effective in halting colonization of Bosawas. Our results show that the ability of the state to defend the biosphere it created is extremely weak. In contrast, indigenous people in Bosawas—with the collaboration, or at least permission, of the state—have been able to maintain the integrity of demarcated indigenous territories without violenc
63	Landscape Fragmentation in Qinling-Daba Mountains Nature Reserves and Its Influencing Factors	Socioeconomic context	Areas of economic development	Negative	Human activities were relatively intense around the edges at 1 km (M-1), and the degree of landscape fragmentation in these areas was found to be high.
64	The Sanjiangyuan Nature Reserve Is Partially Effective in Mitigating Human Pressures	Management	Local interventions, plans or policies	Neutral	Grazing was mitigated most obviously in 2005–2010. In 2003, Qinghai Province started implementing a large-scale herding and grassland restoration project in the Sanjiangyuan region. In 2005, the Sanjiangyuan Ecological Conservation and Construction Project was officially launched. Due to these projects [46], the number of livestock in the reserve is significantly reduced. here is a lack of more c…
65	Effectiveness of the Natura 2000 network for freshwater fish conservation in a Mediterranean region	Management	Ineffective management	Negative	Results showed that PAs did not guarantee less anthropogenic impacts and higher fish species richness than outside PAs, suggesting that PAs are not a panacea for anthropogenic pressures and safeguarding fish diversity
66	Illegal settlement in the Babile Elephant Sanctuary is threatening the resident elephant population	Baseline	High threat area	Negative
66	Illegal settlement in the Babile Elephant Sanctuary is threatening the resident elephant population	Management	Ineffective management	Negative
66	Illegal settlement in the Babile Elephant Sanctuary is threatening the resident elephant population	Governance	Social conflicts	Negative
67	Evaluating heterogeneous conservation effects of forest protection in Indonesia	Location	Accessibility	Negative
68	Does the Establishment of Sustainable Use Reserves Affect Fire Management in the Humid Tropics?	Location	Accessibility	Negative	We show that reserve creation had no discernible impact on fire density, and that fires were less prevalent in SURs due to their characteristics of sparser human settlement and remoteness, rather than their status de jure. In addition, the timing of fires in relation to rainfall, indicative of local fire management and adherence to environmental law, did not improve following SUR creation
68	Does the Establishment of Sustainable Use Reserves Affect Fire Management in the Humid Tropics?	Management	Local interventions, plans or policies	Neutral
68	Does the Establishment of Sustainable Use Reserves Affect Fire Management in the Humid Tropics?	Baseline	Low threat area	Neutral		destroy resources	or destroy the landscape shall be constructed."
69	Landscape Changes in Protected Areas in Poland	Not identified
70	Relating Country-Level Governance and Tree Cover Loss in Sub-Saharan African Protected Areas: Identifying Knowledge Gaps and a More Nuanced Perspective	Socioeconomic context	Development index	Positive
71	Indicators for Assessing Habitat Values and Pressures for Protected Areas-An Integrated Habitat and Land Cover Change Approach for the Udzungwa Mountains National Park in Tanzania	Baseline	High threat area	Negative
72	Assessing the role of protected areas in the land-use change dynamics of a biodiversity hotspot	Management	PA strictness	Positive	more restricted protection led to less human-induced changes
73	Landscape fragmentation of the Natura 2000 network and its surrounding areas	Location	Accessibility	Negative
73	Landscape fragmentation of the Natura 2000 network and its surrounding areas	Design	Fragmentation	Negative	Despite their protected status, our results show that N2k sites are very fragmented. Moreover, fragmentation within N2k sites strongly correlates with the fragmentation of their surroundings
73	Landscape fragmentation of the Natura 2000 network and its surrounding areas	Design	PA age	Neutral	N2k PA age does not correlate with the difference in exterior and interior fragmentation of N2k PA
74	Biological quality of running waters in protected areas: the influence of size and land use	Baseline	Permeable boundaries	Negative	In the protected areas, the biological quality of streams was higher than for the same streams in the surrounding territory provided that anthropogenic changes were fewer. These data indicate that the creation of protected areas per se does not increase freshwater biodiversity and that land use has a major impact on the biological quality of the stream in a protected area
75	Combining historical aerial photography with machine learning to map landscape change impacts on dry grasslands in the Central Alps	Management	Local interventions, plans or policies	Positive	he smaller magnitude of transformed dry grassland (Fig. 5) within the protection boundaries confirms the use of proper management strategies within these sites.
76	Effectiveness of Federal Protected Areas in the Preservation of Mangrove Forests on the Coast of the State of Paraiba, Brazil	Baseline	High threat area	Negative
77	Effectiveness of the Qilian Mountain Nature Reserve of China in Reducing Human Impacts	Baseline	High threat area	Negative
77	Effectiveness of the Qilian Mountain Nature Reserve of China in Reducing Human Impacts	Management	Local interventions, plans or policies	Positive	The QMNR was effective in controlling population density and land use, but ineffective in reducing road construction, mining, and construction of hydropower facilities.
78	Reserves protect against deforestation fires in the Amazon	Location	Accessibility	Negative
78	Reserves protect against deforestation fires in the Amazon	Governance	Indigenous communities	Positive
79	Multiple anthropogenic pressures challenge the effectiveness of protected areas in western Tanzania	Management	Ineffective management	Negative
79	Multiple anthropogenic pressures challenge the effectiveness of protected areas in western Tanzania	Management	PA strictness	Neutral	Our results clearly show that the highest rates of encroachment occurred in areas subject to fewer restrictions to human resource utilization, particularly in UA. Yet, starting from the early 2000s, cropland expansion occurred to a small degree even inside formally PAs
79	Multiple anthropogenic pressures challenge the effectiveness of protected areas in western Tanzania	Location	Population density	Negative	This land-use change is likely associated with an increase of the human population size (119,939 people in 2002 to 179,136 people in 2012) in Mpanda district which is mostly driven by immigration of people belonging to the pastoralists Sukuma ethnicity (
80	Elevated fires during COVID-19 lockdown and the vulnerability of protected areas	Management	Local interventions, plans or policies	Positive	By contrast, in 2020, COVID-19 meant on-site management of Madagascar’s protected areas was suspended from March to July. This period was associated with 76–248% more fires than predicted, after which burning returned to normal.
81	Assessing national human footprint and implications for biodiversity conservation in Iran	Location	Accessibility	Negative
82	A global-level assessment of the effectiveness of protected areas at resisting anthropogenic pressures	Location	Accessibility	Negative
82	A global-level assessment of the effectiveness of protected areas at resisting anthropogenic pressures	Socioeconomic context	Development index	Positive
83	COVID-19 lockdown frees wildlife to roam but increases poaching threats in Nepal	Baseline	High threat area	Negative
83	COVID-19 lockdown frees wildlife to roam but increases poaching threats in Nepal	Management	Local interventions, plans or policies	Positive
84	Land cover dynamics in the Simien Mountains (Ethiopia), half a century after establishment of the National Park	Location	Population density	Negative
85	Spatial and temporal deforestation dynamics in protected and unprotected dry forests: a case study from Myanmar (Burma)	Baseline	High threat area	Negative
86	Monitoring the light pollution changes of China's mangrove forests from 1992-2020 using nighttime light data	Baseline	Permeable boundaries	Negative	he results showed that the area of mangrove forests in China polluted by light increased by 12,112 ha from 1992 to 2020, with the proportion increasing from 12% to 52%, which was directly related to coastal urbanization of southeast China.
87	Protected areas: mixed success in conserving East Africa's evergreen forests	Location	Accessibility	Negative
87	Protected areas: mixed success in conserving East Africa's evergreen forests	Baseline	High threat area	Negative
87	Protected areas: mixed success in conserving East Africa's evergreen forests	Design	Large size	Positive
87	Protected areas: mixed success in conserving East Africa's evergreen forests	Management	PA strictness	Positive
88	Monitoring parks through remote sensing: studies in Nepal and Honduras	Location	Accessibility	Negative
88	Monitoring parks through remote sensing: studies in Nepal and Honduras	Management	Funding and resources	Positive
88	Monitoring parks through remote sensing: studies in Nepal and Honduras	Governance	Governance	Positive
89	The co-management approach has positive impacts on mangrove conservation: evidence from the mono transboundary biosphere reserve (Togo-Benin), West Africa	Governance	Governance	Positive	co-management approach has lowered anthropogenic stressors to mangroves in the reserve.
90	Dynamic threats of nighttime light-represented human activities to giant pandas and their habitat	Management	Local interventions, plans or policies	Positive	he intensity and range of nighttime light inside the natural reserves first increased and then decreased during the two decades, indicating that the protection inside the natural reserves effectively reversed the rapid increase in human activities in the previous decade
90	Dynamic threats of nighttime light-represented human activities to giant pandas and their habitat	Baseline	Permeable boundaries	Negative	our study found that the nighttime light was gradually approaching the giant panda populations from 2000 to 2020, which could be the consequence of the gradual increase in the scope of human activities
91	Fire Response to Local Climate Variability: Huascaran National Park, Peru	Not identified
92	Protected areas have remarkable spillover effects on forest conservation on the QinghaiÂ‰Ã›ÂTibet Plateau	Management	PA strictness	Neutral	no significant difference between national and provin-cial NRs on forest conservation, indicating that stricter protectedareas are not always more effective at forest conservation
93	Global protected area impacts	Location	Accessibility	Negative
94	Natura 2000 Areas, Road, Railway, Water, and Ecological Networks May Provide Pathways for Biological Invasion: A Country Scale Analysis	Location	Accessibility	Negative	we have shown that roads, railways, water and ecological networks play an important role in the occurrence and spread of certain invasive plants in Hungary
95	Changes in the human footprint in and around Indonesia's terrestrial national parks between 2012 and 2017	Location	Accessibility	Negative
95	Changes in the human footprint in and around Indonesia's terrestrial national parks between 2012 and 2017	Location	Population density	Negative
96	Deforestation in Continental Ecuador with a Focus on Protected Areas	Location	Accessibility	Negative	The other drivers of deforestation identified in the multiple regression analysis were distances to mining concessions, settlements, touristic infrastructure, plantations, and roads.
96	Deforestation in Continental Ecuador with a Focus on Protected Areas	Baseline	High threat area	Negative
96	Deforestation in Continental Ecuador with a Focus on Protected Areas	Management	PA strictness	Negative	Protected areas and their buffer zones with higher protection status were identified as the most deforested areas among SNAP.
97	Rapid and large changes in coastal wetland structure in China's four major river deltas	Management	Local interventions, plans or policies	Positive	In China's four major river deltas, four PAs have been established as NNRs, three of which have been listed as Ramsar sites
97	Rapid and large changes in coastal wetland structure in China's four major river deltas	Baseline	Permeable boundaries	Negative	e also found that PAs were effective in halting the decreasing trends in saltmarsh and tidal flat areas, but still, there are great potentials to be improved, especially, the success of PAs in slowing the expansion of reclamation is being counteracted by soaring exotic plant invasions
98	Protected Area Effectiveness in Reducing Conversion in a Rapidly Vanishing Ecosystem: The Brazilian Cerrado	Management	PA strictness	Positive		water and ecological networks play an important role in the occurrence and spread of certain invasive plants in Hungary
99	Land-cover changes in and around a National Park in a mountain landscape in the Pyrenees	Location	Accessibility	Negative
99	Land-cover changes in and around a National Park in a mountain landscape in the Pyrenees	Baseline	Permeable boundaries	Positive	Afforestation
100	Assessment of threat status and management effectiveness in Kakamega forest, Kenya	Management	Funding and resources	Positive
100	Assessment of threat status and management effectiveness in Kakamega forest, Kenya	Management	Local interventions, plans or policies	Positive	Forest Department and Kenya Wildlife Service. The number of trees logged illegally in the last 20 years was significantly lower at sites managed by the Kenya Wildlife Service. Fi
100	Assessment of threat status and management effectiveness in Kakamega forest, Kenya	Management	PA strictness	Positive	ogging was lower within highly protected National and Nature Reserves as compared to high logging within the less protected Forest Reserves
101	The role of protected areas in mitigating human impact in the world's last wilderness areas	Socioeconomic context	Development index	Positive
101	The role of protected areas in mitigating human impact in the world's last wilderness areas	Baseline	Low threat area	Neutral
102	Global protected-area coverage and human pressure on tidal flats	Socioeconomic context	Development index	Positive	Tidal flats in areas of high and very high human pressure that had high PA coverage were typically in developed countries with high governance scores where extensive historic losses had already occurred. whereas countries with lower governance scores, such as India (> 0.05%) and Nigeria (> 0.05%), had minimal to no coverage of tidal flats exposed to high and very high pressure
102	Global protected-area coverage and human pressure on tidal flats	Governance	Governance	Positive	Our results suggest that countries with strong governance may be more likely to progress toward coverage targets
103	Severe human pressures in the Sundaland biodiversity hotspot	Socioeconomic context	Areas of economic development	Negative	he Sundaland biodiversity hotspot has been subjected to intense human pressure that compromises key conservation values in the region. On average, over 70% of protected land is under intense human pressures.
103	Severe human pressures in the Sundaland biodiversity hotspot	Management	PA strictness	Negative	While all protected areas were impacted by human pressures, those managed strictly for biodiversity conservation presented the largest increases. T
104	Assessing naturalness in northern great lakes forests based on historical land-cover and vegetation changes	Baseline	Permeable boundaries	Positive	Land-use abandonment led to a recovery toward initial conditions in the core zone, selective logging in the inland buffer preserved the conditions at the time of park establishment, and ongoing commercial logging outside the park led to continued land transformations.
105	Monitoring of organochlorine pesticides in and around Keoladeo National Park, Bharatpur, Rajasthan, India	Baseline	Permeable boundaries	Negative

## Sheet: 2. Critical appraisal per study
Covidence #	Study ID	Title	Reviewer Name	Criterion 1: Risk of confounding biases	Criterion 1: Risk of confounding biases supporting text	1.1. Is it possible for the impact of the exposure or the effectiveness of the intervention to be confounded in this study?	1.1. Is it possible for the impact of the exposure or the effectiveness of the intervention to be confounded in this study? supporting text	1.2. Did the author(s) control for all the potential confounders?	1.2. Did the author(s) control for all the potential confounders? supporting text	1.3. Is there any justifiable reason for not controlling for all the potential confounders (so that omission of some of the potential confounders is unlikely to influence the assessment of the effectiveness or impact)?	1.3. Is there any justifiable reason for not controlling for all the potential confounders (so that omission of some of the potential confounders is unlikely to influence the assessment of the effectiveness or impact)? supporting text	Criterion 2: Risk of post-intervention/exposure selection biases	Criterion 2: Risk of post-intervention/exposure selection biases supporting text	2.1. Were study subjects or areas selected randomly or systematically before the intervention?	2.1. Were study subjects or areas selected randomly or systematically before the intervention? supporting text	Criterion 3: Risk of misclassified comparison biases (observational studies only)	Criterion 3: Risk of misclassified comparison biases (observational studies only) supporting text	3.1. Were outcome measures clearly defined and consistently applied?	3.1. Were outcome measures clearly defined and consistently applied? supporting text	Criterion 4: Risk of detection biases	Criterion 4: Risk of detection biases supporting text	4.1. Were outcome measures clearly defined and consistently applied?	4.1. Were outcome measures clearly defined and consistently applied? supporting text	Criterion 5: Risk of outcome reporting biases	Criterion 5: Risk of outcome reporting biases supporting text	5.1 Are the reported relevant outcome data (or effect estimate) likely to be of (or based on) selected measurements of the outcome?	5.1 Are the reported relevant outcome data (or effect estimate) likely to be of (or based on) selected measurements of the outcome? supporting text	5.2 Are relevant outcome data likely to be unreported for some subgroup(s)?	5.2 Are relevant outcome data likely to be unreported for some subgroup(s)? supporting text	Criterion 6: Risk of outcome assessment biases	Criterion 6: Risk of outcome assessment biases supporting text	Is it likely that there is/are error(s) or inappropriate methods in the applied descriptive statistical analyses?	Is it likely that there is/are error(s) or inappropriate methods in the applied descriptive statistical analyses? supporting text
387	Alvarado 2018	Management impacts on fire occurrence: A comparison of fire regimes of African and South American tropical savannas in different protected areas	Katherine Pulido Chadid	Medium	No confounders mentioned	Seemingly yes		No		No		Low		Yes		Low		Yes		Low		Yes		Low		Yes		No		Low		No
387	Alvarado 2018	Management impacts on fire occurrence: A comparison of fire regimes of African and South American tropical savannas in different protected areas	Consensus	Medium		Seemingly yes		No		No		Medium		Seemingly no		Low		Yes		Low		Yes		Low		Yes		No		Low		No
385	Andrade-Nunez 2020	Using nighttime lights to assess infrastructure expansion within and around protected areas in South America	Katherine Pulido Chadid	Low		Yes		Seemingly yes		Seemingly no		Low		Seemingly yes		Low		Yes		Low		Yes		Low		Yes		No		Low		No
385	Andrade-Nunez 2020	Using nighttime lights to assess infrastructure expansion within and around protected areas in South America	Consensus	Low		Yes		Seemingly yes		Seemingly no		Low		Seemingly yes		Low		Yes		Low		Yes		Low		Yes		No		Low		No
380		Differential vulnerability to biological invasions: not all protected areas (and not all invaders) are the same	Katherine Pulido Chadid	Low		Seemingly yes		Seemingly yes		NA		Low		Seemingly yes		Low		Yes		Low		Yes		Low		Yes		No		Low		No
380		Differential vulnerability to biological invasions: not all protected areas (and not all invaders) are the same	Consensus	Low		Seemingly yes		Seemingly yes		NA		Low		Seemingly yes		Low		Yes		Low		Yes		Low		Yes		No		Low		No
375	Boyle 2021	Road-effect mitigation promotes connectivity and reduces mortality at the population-level	Katherine Pulido Chadid	Low		No		Yes		NA		Low		Yes		Low		Yes		Low		Yes		Low		Yes		No		Low		Yes
375	Boyle 2021	Road-effect mitigation promotes connectivity and reduces mortality at the population-level	Consensus	Low		No		Yes		NA		Low		Yes		Low		Yes		Low		Yes		Low		Yes		No		Low		Yes
360	Cisneros 2022	Impacts of conservation incentives in protected areas: The case of Bolsa Floresta, Brazil	Katherine Pulido Chadid	Low		Yes		Yes		NA		Low		Yes		Low		Yes		Low		Yes		Low		Yes		No		Low		No
360	Cisneros 2022	Impacts of conservation incentives in protected areas: The case of Bolsa Floresta, Brazil	Consensus	Low		Yes		Yes		NA		Low		Yes		Low		Yes		Low		Yes		Low		Yes		No		Low		No
356		Urban sprawl into Natura 2000 network over Europe	Katherine Pulido Chadid	Medium		Seemingly yes		Seemingly yes		NA		Medium		No		Low		Yes		Low		Yes		Low		Yes		Seemingly no		Low		No
356		Urban sprawl into Natura 2000 network over Europe	Consensus	Low		Seemingly yes		Seemingly yes		NA		Medium		Seemingly no		Low		Yes		Low		Yes		Low		Yes		Seemingly no		Low		No
354	Conciani 2021	Human-climate interactions shape fire regimes in the Cerrado of SÃ£o Paulo state, Brazil	Katherine Pulido Chadid	Medium		Seemingly yes		Seemingly no		No		Medium		Seemingly no		Low		Yes		Low		Yes		Low		Yes		Seemingly no		Low		Seemingly no
354	Conciani 2021	Human-climate interactions shape fire regimes in the Cerrado of SÃ£o Paulo state, Brazil	Consensus	Medium		Seemingly yes		Seemingly no		No		Medium		Seemingly no		Low		Yes		Low		Yes		Low		Yes		Seemingly no		Low		Seemingly no
351	deCarvalho 2023	How does the fire regime change after creating a protected area in the Brazilian Cerrado?	Katherine Pulido Chadid	Low		Seemingly yes		Seemingly no		No		Medium		Seemingly no		Low		Yes		Low		Yes		Low		Yes		No		Low		No
351	deCarvalho 2023	How does the fire regime change after creating a protected area in the Brazilian Cerrado?	Consensus	Low		Seemingly yes		Seemingly no		No		Low		Seemingly yes		Low		Yes		Low		Yes		Low		Yes		No		Low		No
340		Assessment of National Parks affected by naturbanization processes in Southern Europe	Katherine Pulido Chadid	Medium		Yes		Seemingly no		Seemingly no		Medium		Seemingly no		Low		Yes		Low		Yes		Low		Yes		No		Low		No
340		Assessment of National Parks affected by naturbanization processes in Southern Europe	Consensus	Low		Yes		Seemingly yes		NA		Low		Yes		Low		Yes		Low		Yes		Low		Yes		No		Low		No
339		Compound impact of land use and extreme climate on the 2020 fire record of the Brazilian Pantanal	Katherine Pulido Chadid	Low		Seemingly no		Seemingly yes		NA		Medium		No		Low		Yes		Low		Yes		Medium		Yes		Seemingly yes		Low		No
339		Compound impact of land use and extreme climate on the 2020 fire record of the Brazilian Pantanal	Consensus	Low		Seemingly no		Seemingly yes		NA		Medium		No		Low		Yes		Low		Yes		Medium		Yes		Seemingly yes		Low		No
327	Gonson 2017	Influence of settings management and protection status on recreational uses and pressures in marine protected areas	Katherine Pulido Chadid	Medium		Seemingly yes		Seemingly no		No		Medium		Seemingly no		Low		Yes		Low		Yes		Low		Yes		No		Low		No
327	Gonson 2017	Influence of settings management and protection status on recreational uses and pressures in marine protected areas	Consensus	Medium		Seemingly yes		Seemingly no		No		Medium		Seemingly no		Low		Yes		Low		Yes		Low		Yes		No		Low		No
324	Green 2013	Deforestation in an African biodiversity hotspot: Extent, variation and the effectiveness of protected areas	Katherine Pulido Chadid	Low		Yes		Yes		NA		Medium		Seemingly yes		Low		Yes		Low		Yes		Low		Yes		No		Low		No
324	Green 2013	Deforestation in an African biodiversity hotspot: Extent, variation and the effectiveness of protected areas	Consensus	Low		Yes		Yes		NA		Medium		Seemingly yes		Low		Yes		Low		Yes		Low		Yes		No		Low		No
322		Is the Natura 2000 network effective to prevent the biological invasions?	Katherine Pulido Chadid	Low		Seemingly yes		Seemingly yes		NA		Medium		Seemingly yes		Low		Yes		Low		Yes		Low		Yes		No		Low		No
322		Is the Natura 2000 network effective to prevent the biological invasions?	Consensus	Low		Seemingly yes		Seemingly yes		NA		Medium		Seemingly yes		Low		Yes		Low		Yes		Low		Yes		No		Low		No
321		Worldwide increase in Artificial Light At Night around protected areas and within biodiversity hotspots	Katherine Pulido Chadid	Low		Seemingly no		Seemingly yes		NA		Low		NA		Low		Yes		Low		Yes		Low		Yes		No		Low		No
321		Worldwide increase in Artificial Light At Night around protected areas and within biodiversity hotspots	Consensus	Low		Seemingly no		Seemingly yes		NA		Low		NA		Low		Yes		Low		Yes		Low		Yes		No		Low		No
319	Haruna 2014	Evolving protected-area impacts in Panama: impact shifts show that plans require anticipation	Katherine Pulido Chadid	Low		Yes		Yes		NA		Low		Yes		Low		Yes		Low		Yes		Low		Yes		No		Low		No
319	Haruna 2014	Evolving protected-area impacts in Panama: impact shifts show that plans require anticipation	Consensus	Low		Yes		Yes		NA		Low		Yes		Low		Yes		Low		Yes		Low		Yes		No		Low		No
317	Hirons 2022	Assessing variation in the effectiveness of IUCN protected area categorisation. What remotely sensed forest integrity and human modification reveals across the major tropical forest biomes	Katherine Pulido Chadid	Medium		Yes		Seemingly yes		Seemingly yes		NA		NA		Low		Yes		Low		Yes		Low		Yes		No		Low		No
317	Hirons 2022	Assessing variation in the effectiveness of IUCN protected area categorisation. What remotely sensed forest integrity and human modification reveals across the major tropical forest biomes	Consensus	Medium		Yes		Seemingly yes		Seemingly yes		NA		NA		Low		Yes		Low		Yes		Low		Yes		No		Low		No
314	Hua 2022	Continuous growth of human footprint risks compromising the benefits of protected areas on the Qinghai-Tibet Plateau	Katherine Pulido Chadid	Low		Seemingly yes		Yes		NA		Medium		Seemingly no		Low		Yes		Low		Yes		Low		Yes		No		Low		No
314	Hua 2022	Continuous growth of human footprint risks compromising the benefits of protected areas on the Qinghai-Tibet Plateau	Consensus	Low		Seemingly yes		Yes		NA		Medium		Seemingly no		Low		Yes		Low		Yes		Low		Yes		No		Low		No
310	Islam 2019	Analyzing multi-temporal satellite imagery and stakeholders' perceptions to have an insight into how forest co-management is changing the protected area landscapes in Bangladesh	Katherine Pulido Chadid	Medium		Seemingly yes		Seemingly yes		NA		Low		Seemingly yes		Low		Yes		Low		Yes		Low		Yes		No		Low		No
310	Islam 2019	Analyzing multi-temporal satellite imagery and stakeholders' perceptions to have an insight into how forest co-management is changing the protected area landscapes in Bangladesh	Consensus	Medium		Seemingly yes		Seemingly yes		NA		Low		Seemingly yes		Low		Yes		Low		Yes		Low		Yes		No		Low		No
302	Kenyon 2018	Business as usual for the human use of Moreton Bay following marine park zoning	Katherine Pulido Chadid	Low		Seemingly yes		Seemingly yes		NA		Medium		Seemingly yes		Low		Yes		Low		Yes		Low		Yes		No		Low		Yes
302	Kenyon 2018	Business as usual for the human use of Moreton Bay following marine park zoning	Consensus	Low		Seemingly yes		Seemingly yes		NA		Medium		Seemingly yes		Low		Yes		Low		Yes		Low		Yes		No		Low		Yes
301	Khalyani 2013	Ecological indicators for protection impact assessment at two scales in the Bozin and Marakhil protected area, Iran	Katherine Pulido Chadid	Medium		Seemingly yes		Seemingly no		NA		Low		Seemingly no		Low		Yes		Low		Yes		Low		Yes		No		Low		No
301	Khalyani 2013	Ecological indicators for protection impact assessment at two scales in the Bozin and Marakhil protected area, Iran	Consensus	Medium		Seemingly yes		Seemingly no		NA		Low		Seemingly no		Low		Yes		Low		Yes		Low		Yes		No		Low		No
299	Kivinen 2015	Many a little makes a mickle: Cumulative land cover changes and traditional land use in the Kyro reindeer herding district, northern Finland	Katherine Pulido Chadid	Low		Seemingly yes		Yes		NA		Medium		Seemingly no		Low		Yes		Low		Yes		Low		Yes		No		Low		No
299	Kivinen 2015	Many a little makes a mickle: Cumulative land cover changes and traditional land use in the Kyro reindeer herding district, northern Finland	Consensus	Low		Seemingly yes		Yes		NA		Medium		Seemingly no		Low		Yes		Low		Yes		Low		Yes		No		Low		No
295	Kusimi 2015	Characterizing land disturbance in Atewa Range Forest Reserve and Buffer Zone	Katherine Pulido Chadid	Medium		Seemingly yes		No		No		Medium		No		Low		Seemingly yes		Low		Seemingly yes		Low		Seemingly yes		Seemingly no		Low		Seemingly no
295	Kusimi 2015	Characterizing land disturbance in Atewa Range Forest Reserve and Buffer Zone	Consensus	Medium		Seemingly yes		No		No		Medium		No		Low		Seemingly yes		Low		Seemingly yes		Low		Seemingly yes		Seemingly no		Low		Seemingly no
294		Are MPAs effective in removing fishing pressure from benthic species and habitats?	Katherine Pulido Chadid	Medium		Seemingly yes		Seemingly yes		NA		Medium		Seemingly no		Low		Yes		Low		Yes		Low		Yes		Seemingly no		Low		No
294		Are MPAs effective in removing fishing pressure from benthic species and habitats?	Consensus	Medium		Seemingly yes		Seemingly yes		NA		Medium		Seemingly no		Low		Yes		Low		Yes		Low		Yes		Seemingly no		Low		No
292		Land use and landscape pattern changes on the inside and outside of protected areas in urbanizing Selangor state, peninsular Malaysia	Katherine Pulido Chadid	Medium		Seemingly yes		Seemingly no		NA		Medium		Seemingly no		Low		Yes		Low		Yes		Low		Yes		No		Low		Yes
292		Land use and landscape pattern changes on the inside and outside of protected areas in urbanizing Selangor state, peninsular Malaysia	Consensus	Medium		Seemingly yes		Seemingly no		NA		Medium		Seemingly no		Low		Yes		Low		Yes		Low		Yes		No		Low		Yes
288	Li 2020	Human pressure dynamics in protected areas of China based on nighttime light	Katherine Pulido Chadid	Medium		Seemingly yes		No		No		Medium		Seemingly no		Low		Yes		Low		Yes		Low		Yes		No		Low		No
288	Li 2020	Human pressure dynamics in protected areas of China based on nighttime light	Consensus	Medium		Seemingly yes		No		No		Medium		Seemingly no		Low		Yes		Low		Yes		Low		Yes		No		Low		No
286	Li 2018	Human footprint in Tibet: Assessing the spatial layout and effectiveness of nature reserves	Katherine Pulido Chadid	Medium		Seemingly yes		Seemingly yes		NA		Low		Yes		Low		Yes		Low		Yes		Low		Yes		No		Low		No
286	Li 2018	Human footprint in Tibet: Assessing the spatial layout and effectiveness of nature reserves	Consensus	Medium		Seemingly yes		Seemingly yes		NA		Low		Yes		Low		Yes		Low		Yes		Low		Yes		No		Low		No
280	Liu 2022	Effectiveness of functional zones in National Nature Reserves for the protection of forest ecosystems in China	Katherine Pulido Chadid	Medium		Seemingly yes		Seemingly no		NA		Low		Seemingly no		Low		Yes		Low		Yes		Low		Yes		No		Low		No
280	Liu 2022	Effectiveness of functional zones in National Nature Reserves for the protection of forest ecosystems in China	Consensus	Medium		Seemingly yes		Seemingly no		NA		Low		Seemingly no		Low		Yes		Low		Yes		Low		Yes		No		Low		No
273		A global assessment of the human pressure on the world's lakes	Katherine Pulido Chadid	Low		Seemingly yes		Seemingly yes		NA		Low		Yes		Low		Yes		Low		Yes		Low		Yes		No		Low		No
273		A global assessment of the human pressure on the world's lakes	Consensus	Low		Seemingly yes		Seemingly yes		NA		Low		Yes		Low		Yes		Low		Yes		Low		Yes		No		Low		No
270		Recent land cover changes in Spain across biogeographical regions and protection levels: Implications for conservation policies	Katherine Pulido Chadid	Low		Seemingly no		Seemingly yes		NA		Medium		Seemingly yes		Low		Yes		Low		Yes		Low		Yes		No		Low		No
270		Recent land cover changes in Spain across biogeographical regions and protection levels: Implications for conservation policies	Consensus	Low		Seemingly no		Seemingly yes		NA		Medium		Seemingly yes		Low		Yes		Low		Yes		Low		Yes		No		Low		No
267	Meng 2022	Effectiveness in protected areas at resisting development pressures in China	Katherine Pulido Chadid	Low		Yes		Yes		NA		Low		Yes		Low		Yes		Low		Yes		Low		Yes		No		Low		No
267	Meng 2022	Effectiveness in protected areas at resisting development pressures in China	Consensus	Low		Yes		Yes		NA		Low		Yes		Low		Yes		Low		Yes		Low		Yes		No		Low		No
266		European National Parks protect their surroundings but not everywhere: A study using land use/land cover dynamics derived from CORINE Land Cover data	Katherine Pulido Chadid	Low		Seemingly yes		Seemingly yes		NA		Low		Seemingly yes		Low		Yes		Low		Yes		Low		Yes		No		Low		No
266		European National Parks protect their surroundings but not everywhere: A study using land use/land cover dynamics derived from CORINE Land Cover data	Consensus	Low		Seemingly yes		Seemingly yes		NA		Low		Seemingly yes		Low		Yes		Low		Yes		Low		Yes		No		Low		No
264		Terrestrial protected areas do not fully shield their streams from exogenous stressors	Katherine Pulido Chadid	Medium		Seemingly yes		Seemingly no		NA		Medium		Seemingly yes		Low		Yes		Low		Yes		Low		Yes		No		Low		No
264		Terrestrial protected areas do not fully shield their streams from exogenous stressors	Consensus	Medium		Seemingly yes		Seemingly no		NA		Medium		Seemingly yes		Low		Yes		Low		Yes		Low		Yes		No		Low		No
261		Are ranger patrols effective in reducing poaching-related threats within protected areas?	Katherine Pulido Chadid	Low		Seemingly no		Yes		NA		Low		Seemingly yes		Low		Yes		Low		Yes		Low		Yes		No		Low		No
261		Are ranger patrols effective in reducing poaching-related threats within protected areas?	Consensus	Low		Seemingly no		Yes		NA		Low		Seemingly yes		Low		Yes		Low		Yes		Low		Yes		No		Low		No
258	Nikolich 2021	The sources and prevalence of anthropogenic noise in Rockfish Conservation Areas with implications for marine reserve planning	Katherine Pulido Chadid	Low		Seemingly yes		Seemingly yes		NA		Medium		Seemingly yes		Low		Yes		Low		Yes		Low		Yes		Seemingly no		Low		No
258	Nikolich 2021	The sources and prevalence of anthropogenic noise in Rockfish Conservation Areas with implications for marine reserve planning	Consensus	Low		Seemingly yes		Seemingly yes		NA		Medium		Seemingly yes		Low		Yes		Low		Yes		Low		Yes		Seemingly no		Low		No
257	Olsoy 2016	Quantifying the effects of deforestation and fragmentation on a range-wide conservation plan for jaguars	Katherine Pulido Chadid	Medium		Seemingly yes		Seemingly no		No		Medium		Seemingly yes		Low		Yes		Low		Yes		Low		Seemingly yes		No		Low		No
257	Olsoy 2016	Quantifying the effects of deforestation and fragmentation on a range-wide conservation plan for jaguars	Consensus	Medium		Seemingly yes		Seemingly no		No		Medium		Seemingly yes		Low		Yes		Low		Yes		Low		Seemingly yes		No		Low		No
245		A twenty year GIS-based assessment of environmental sustainability of land use changes in and around protected areas of a fast developing country: Spain	Katherine Pulido Chadid	Low		Seemingly yes		Seemingly no		NA		Medium		Seemingly yes		Low		Yes		Low		Yes		Low		Yes		No		Low		No
245		A twenty year GIS-based assessment of environmental sustainability of land use changes in and around protected areas of a fast developing country: Spain	Consensus	Low		Seemingly yes		Seemingly no		NA		Medium		Seemingly yes		Low		Yes		Low		Yes		Low		Yes		No		Low		No
243		Development stressors are stronger than protected area management: A case of the Pantanos de Centla Biosphere Reserve, Mexico	Katherine Pulido Chadid	Medium		Seemingly yes		Seemingly yes		NA		Medium		Seemingly no		Low		Yes		Low		Yes		Low		Yes		No		Low		No
243		Development stressors are stronger than protected area management: A case of the Pantanos de Centla Biosphere Reserve, Mexico	Consensus	Medium		Seemingly yes		Seemingly yes		NA		Medium		Seemingly no		Low		Yes		Low		Yes		Low		Yes		No		Low		No
237		Protection status and national socio-economic context shape land conversion in and around a key transboundary protected area complex in West Africa	Katherine Pulido Chadid	Low		Seemingly yes		Seemingly no		Seemingly yes		Medium		Seemingly no		Low		Yes		Low		Yes		Low		Yes		No		Low		No
237		Protection status and national socio-economic context shape land conversion in and around a key transboundary protected area complex in West Africa	Consensus	Low		Seemingly yes		Seemingly no		Seemingly yes		Medium		Seemingly no		Low		Yes		Low		Yes		Low		Yes		No		Low		No
234	Shackleton 2020	Assessing biological invasions in protected areas after 30 years: Revisiting nature reserves targeted by the 1980s SCOPE programme	Katherine Pulido Chadid	Medium		Seemingly no		Seemingly no		Seemingly no		Medium		Seemingly no		Low		Yes		Low		Yes		Low		Yes		No		Low		No
234	Shackleton 2020	Assessing biological invasions in protected areas after 30 years: Revisiting nature reserves targeted by the 1980s SCOPE programme	Consensus	Medium		Seemingly no		Seemingly no		Seemingly no		Medium		Seemingly no		Low		Yes		Low		Yes		Low		Yes		No		Low		No
233		What determines the effectiveness of national protected area networks?	Katherine Pulido Chadid	Low		Yes		Yes		Yes		Low		Yes		Low		Yes		Low		Yes		Low		Yes		No		Low		No
233		What determines the effectiveness of national protected area networks?	Consensus	Low		Yes		Yes		Yes		Low		Yes		Low		Yes		Low		Yes		Low		Yes		No		Low		No
225	Tapia-Armijos 2017	Spatio-temporal analysis of the human footprint in South Ecuador: Influence of human pressure on ecosystems and effectiveness of protected areas	Katherine Pulido Chadid	Medium		Yes		Yes		NA		Low		Yes		Low		Yes		Low		Yes		Low		Yes		No		Low		No
225	Tapia-Armijos 2017	Spatio-temporal analysis of the human footprint in South Ecuador: Influence of human pressure on ecosystems and effectiveness of protected areas	Consensus	Medium		Yes		Yes		NA		Low		Yes		Low		Yes		Low		Yes		Low		Yes		No		Low		No
223		Human transformation of ecosystems: Comparing protected and unprotected areas with natural baselines	Katherine Pulido Chadid	Medium		Yes		Seemingly no		NA		Medium		Seemingly no		Low		Yes		Low		Yes		Low		Yes		No		Low		No
223		Human transformation of ecosystems: Comparing protected and unprotected areas with natural baselines	Consensus	Medium		Yes		Seemingly no		NA		Medium		Seemingly no		Low		Yes		Low		Yes		Low		Yes		No		Low		No
218	Wang 2021	Spatial-temporal pattern analysis of landscape ecological risk assessment based on land use/land cover change in Baishuijiang National nature reserve in Gansu Province, China	Katherine Pulido Chadid	Medium		Yes		Seemingly no		Seemingly no		Medium		Seemingly no		Low		Yes		Low		Yes		Low		Yes		No		Low		No
218	Wang 2021	Spatial-temporal pattern analysis of landscape ecological risk assessment based on land use/land cover change in Baishuijiang National nature reserve in Gansu Province, China	Consensus	Medium		Yes		Seemingly no		Seemingly no		Medium		Seemingly no		Low		Yes		Low		Yes		Low		Yes		No		Low		No
213	Wu 2022	Changes in habitat quality of nature reserves in depopulating areas due to anthropogenic pressure: Evidence from Northeast China, 2000-2018	Katherine Pulido Chadid	Medium		Seemingly yes		Yes		NA		Low		Yes		Low		Yes		Low		Yes		Low		Yes		Yes		Low		No
213	Wu 2022	Changes in habitat quality of nature reserves in depopulating areas due to anthropogenic pressure: Evidence from Northeast China, 2000-2018	Consensus	Medium		Seemingly yes		Yes		NA		Low		Yes		Low		Yes		Low		Yes		Low		Yes		Yes		Low		No
209	Xu 2022	Have China's national forest reserves designated since 1990 conserved forests effectively?	Katherine Pulido Chadid	Medium		Yes		Seemingly no		NA		Low		Seemingly yes		Low		Yes		Low		Yes		Low		Yes		No		Low		No
209	Xu 2022	Have China's national forest reserves designated since 1990 conserved forests effectively?	Consensus	Medium		Yes		Seemingly no		NA		Low		Seemingly yes		Low		Yes		Low		Yes		Low		Yes		No		Low		No
204	Zhang 2013	Sustainability of social-ecological systems under conservation projects: Lessons from a biodiversity hotspot in western China	Katherine Pulido Chadid	Low		No		Seemingly yes		NA		NA		NA		Low		Yes		Low		Yes		Low		Yes		No		Low		No
204	Zhang 2013	Sustainability of social-ecological systems under conservation projects: Lessons from a biodiversity hotspot in western China	Consensus	Low		No		Seemingly yes		NA		NA		NA		Low		Yes		Low		Yes		Low		Yes		No		Low		No
201		How good is your marine protected area at curbing threats?	Katherine Pulido Chadid	Low		Yes		Yes		NA		Low		Seemingly yes		Low		Yes		Low		Yes		Low		Yes		No		Low		No
201		How good is your marine protected area at curbing threats?	Consensus	Low		Yes		Yes		NA		Low		Seemingly yes		Low		Yes		Low		Yes		Low		Yes		No		Low		No
196	Feng 2022	Improving protected area effectiveness through consideration of different human-pressure baselines	Katherine Pulido Chadid	Low		Seemingly yes		Yes		NA		Low		Seemingly yes		Low		Yes		Low		Yes		Low		Yes				Low		No
196	Feng 2022	Improving protected area effectiveness through consideration of different human-pressure baselines	Consensus	Low		Seemingly yes		Yes		NA		Low		Seemingly yes		Low		Yes		Low		Yes		Low		Yes				Low		No
195	AkodÃ©wou 2020	Land Use and Land Cover Dynamics Analysis of the Togodo Protected Area and Its Surroundings in Southeastern Togo, West Africa	Katherine Pulido Chadid	Low		Seemingly yes		Seemingly yes		NA		Medium		Seemingly no		Low		Yes		Low		Yes		Low		Yes		No		Low		No
195	AkodÃ©wou 2020	Land Use and Land Cover Dynamics Analysis of the Togodo Protected Area and Its Surroundings in Southeastern Togo, West Africa	Consensus	Medium		Seemingly yes		Seemingly yes		NA		Medium		No		Low		Yes		Low		Yes		Low		Yes		No		Low		No
187	Ren 2021	An invasive species erodes the performance of coastal wetland protected areas	Katherine Pulido Chadid	Low		Yes		Yes		NA		Low		Yes		Low		Yes		Low		Yes		Low		Yes		No		Low		No
187	Ren 2021	An invasive species erodes the performance of coastal wetland protected areas	Consensus	Low		Yes		Yes		NA		Low		Yes		Low		Yes		Low		Yes		Low		Yes		No		Low		No
185	Clark 2013	Protected areas in South Asia have not prevented habitat loss: a study using historical models of land-use change	Consensus	Medium		Seemingly yes		Seemingly no		NA		Medium		No		Low		Yes		Low		Yes		Low		Yes		No		Low		No
180	Bowker 2017	Effectiveness of Africa's tropical protected areas for maintaining forest cover	Katherine Pulido Chadid	Low		Seemingly yes		Yes		NA		Low		Yes		Low		Yes		Low		Yes		Low		Yes		No		Low		No
180	Bowker 2017	Effectiveness of Africa's tropical protected areas for maintaining forest cover	Consensus	Low		Seemingly yes		Yes		NA		Low		Yes		Low		Yes		Low		Yes		Low		Yes		No		Low		No
179	Giakoumi 2019	Exploring the relationships between marine protected areas and invasive fish in the world's most invaded sea	Katherine Pulido Chadid	Low		Yes		Yes		NA		Medium		Seemingly no		Low		Yes		Low		Yes		Low		Yes		No		Low		No
179	Giakoumi 2019	Exploring the relationships between marine protected areas and invasive fish in the world's most invaded sea	Consensus	Low		Yes		Yes		NA		Medium		Seemingly no		Low		Yes		Low		Yes		Low		Yes		No		Low		No
177	Beresford 2018	Correlates of long-term land-cover change and protected area performance at priority conservation sites in Africa	Katherine Pulido Chadid	Low		Seemingly yes		Yes		NA		Low		Yes		Low		Yes		Low		Yes		Low		Yes		No		Low		No
177	Beresford 2018	Correlates of long-term land-cover change and protected area performance at priority conservation sites in Africa	Consensus	Low		Seemingly yes		Yes		NA		Low		Yes		Low		Yes		Low		Yes		Low		Yes		No		Low		No
175	Potapov 2017	The last frontiers of wilderness: Tracking loss of intact forest landscapes from 2000 to 2013	Katherine Pulido Chadid	Medium		Yes		Yes		NA		Medium		Seemingly yes		Low		Yes		Low		Yes		Low		Yes		No		Low		No
175	Potapov 2017	The last frontiers of wilderness: Tracking loss of intact forest landscapes from 2000 to 2013	Consensus	Medium		Yes		Yes		NA		Medium		Seemingly yes		Low		Yes		Low		Yes		Low		Yes		No		Low		No
170	Mwangi 2010	Tracking trends in key sites for biodiversity: a case study using Important Bird Areas in Kenya	Katherine Pulido Chadid	Medium		Seemingly yes		Seemingly no		No		High		Seemingly no		Low		Yes		Low		Yes		Medium		Yes		Seemingly yes		Low		No
170	Mwangi 2010	Tracking trends in key sites for biodiversity: a case study using Important Bird Areas in Kenya	Consensus	Medium		Seemingly yes		Seemingly no		No		High		Seemingly no		Low		Yes		Low		Yes		Medium		Yes		Seemingly yes		Low		No
169	Geldmann 2014	Mapping change in human pressure globally on land and within protected areas	Katherine Pulido Chadid	Low		Seemingly no		Yes		NA		Low		Seemingly no		Low		Yes		Low		Yes		Low		Yes		No		Low		No
169	Geldmann 2014	Mapping change in human pressure globally on land and within protected areas	Consensus	Low		Seemingly no		Yes		NA		Low		Seemingly no		Low		Yes		Low		Yes		Low		Yes		No		Low		No
162	White 2020	Tracking the response of industrial fishing fleets to large marine protected areas in the Pacific Ocean	Katherine Pulido Chadid	Medium		Yes		Seemingly yes		NA		Medium		Seemingly yes		Low		Yes		Low		Yes		Low		Yes		No		Low		No
162	White 2020	Tracking the response of industrial fishing fleets to large marine protected areas in the Pacific Ocean	Consensus	Medium		Yes		Seemingly yes		NA		Medium		Seemingly yes		Low		Yes		Low		Yes		Low		Yes		No		Low		No
157	Maiorano 2008	Size-dependent resistance of protected areas to land-use change	Katherine Pulido Chadid	Medium		Seemingly yes		Seemingly no		No		Medium		Seemingly no		Low		Yes		Low		Yes		Low		Yes		No		Low		No
157	Maiorano 2008	Size-dependent resistance of protected areas to land-use change	Consensus	Medium		Seemingly yes		Seemingly no		No		Medium		Seemingly no		Low		Yes		Low		Yes		Low		Yes		No		Low		No
153	Graham 2021	Southeast Asian protected areas are effective in conserving forest cover and forest carbon stocks compared to unprotected areas	Katherine Pulido Chadid	Low		Yes		Yes		NA		Low		Yes		Low		Yes		Low		Yes		Low		Yes		No		Low		No
153	Graham 2021	Southeast Asian protected areas are effective in conserving forest cover and forest carbon stocks compared to unprotected areas	Consensus	Low		Yes		Yes		NA		Low		Yes		Low		Yes		Low		Yes		Low		Yes		No		Low		No
148	Stocks 2007	Indigenous, colonist, and government Impacts on Nicaragua's Bosawas Reserve	Katherine Pulido Chadid	Medium		Yes		Seemingly no		NA		Medium		Seemingly no		Low		Yes		Low		Yes		Low		Yes		No		Low		No
148	Stocks 2007	Indigenous, colonist, and government Impacts on Nicaragua's Bosawas Reserve	Consensus	Medium		Yes		Seemingly no		NA		Medium		Seemingly no		Low		Yes		Low		Yes		Low		Yes		No		Low		No
147	Zhang 2021	Landscape Fragmentation in Qinling-Daba Mountains Nature Reserves and Its Influencing Factors	Katherine Pulido Chadid	Medium		Yes		Seemingly no		Seemingly yes		Medium		No		Low		Yes		Low		Seemingly yes		Low		Yes		No		Low		No
147	Zhang 2021	Landscape Fragmentation in Qinling-Daba Mountains Nature Reserves and Its Influencing Factors	Consensus	Medium		Yes		Seemingly no		Seemingly yes		Medium		No		Low		Yes		Low		Seemingly yes		Low		Yes		No		Low		No
132	Tan 2022	The Sanjiangyuan Nature Reserve Is Partially Effective in Mitigating Human Pressures	Katherine Pulido Chadid	Medium		Yes		Yes		NA		Medium		Seemingly yes		Low		Yes		Low		Yes		Low		Yes		No		Low		No
132	Tan 2022	The Sanjiangyuan Nature Reserve Is Partially Effective in Mitigating Human Pressures	Consensus	Medium		Yes		Yes		NA		Medium		Seemingly yes		Low		Yes		Low		Yes		Low		Yes		No		Low		No
128	Gavioli 2023	Effectiveness of the Natura 2000 network for freshwater fish conservation in a Mediterranean region	Katherine Pulido Chadid	Medium		Seemingly yes		Seemingly yes		NA		Medium		Seemingly yes		Low		Yes		Low		Yes		Low		Yes		No		Low		No
128	Gavioli 2023	Effectiveness of the Natura 2000 network for freshwater fish conservation in a Mediterranean region	Consensus	Medium		Seemingly yes		Seemingly yes		NA		Medium		Seemingly yes		Low		Yes		Low		Yes		Low		Yes		No		Low		No
125	Neil 2021	Illegal settlement in the Babile Elephant Sanctuary is threatening the resident elephant population	Katherine Pulido Chadid	Low		Seemingly yes		Seemingly no		No		Medium		Seemingly no		Low		Yes		Low		Yes		Low		Yes		Seemingly yes		Low		No
125	Neil 2021	Illegal settlement in the Babile Elephant Sanctuary is threatening the resident elephant population	Consensus	Low		Seemingly yes		Seemingly no		No		Medium		Seemingly no		Low		Yes		Low		Yes		Low		Yes		Seemingly yes		Low		No
117	Shah 2015	Evaluating heterogeneous conservation effects of forest protection in Indonesia	Katherine Pulido Chadid	Medium		Yes		Seemingly yes		NA		Low		Yes		Low		Yes		Low		Yes		Low		Yes		No		Low		No
117	Shah 2015	Evaluating heterogeneous conservation effects of forest protection in Indonesia	Consensus	Medium		Yes		Seemingly yes		NA		Low		Yes		Low		Yes		Low		Yes		Low		Yes		No		Low		No
113	Carmenta 2016	Does the Establishment of Sustainable Use Reserves Affect Fire Management in the Humid Tropics?	Consensus	Low		Seemingly yes		Yes		NA		Medium		Seemingly no		Low		Yes		Low		Yes		Low		Yes		Seemingly no		Low		No
112	Zbierska 2022	Landscape Changes in Protected Areas in Poland	Katherine Pulido Chadid	Medium		Yes		Seemingly no		No		Medium		Seemingly no		Low		Yes		Low		Yes		Low		Yes		No		Low		No
112	Zbierska 2022	Landscape Changes in Protected Areas in Poland	Consensus	Medium		Yes		Seemingly no		No		Medium		Seemingly no		Low		Yes		Low		Yes		Low		Yes		No		Low		No
105	Dehmel 2022	Relating Country-Level Governance and Tree Cover Loss in Sub-Saharan African Protected Areas: Identifying Knowledge Gaps and a More Nuanced Perspective	Katherine Pulido Chadid	Medium		Yes		Seemingly no		Seemingly yes		Medium		Seemingly no		Low		Yes		Low		Yes		Low		Yes		No		Low		No
105	Dehmel 2022	Relating Country-Level Governance and Tree Cover Loss in Sub-Saharan African Protected Areas: Identifying Knowledge Gaps and a More Nuanced Perspective	Consensus	Medium		Yes		Seemingly no		Seemingly yes		Medium		Seemingly no		Low		Yes		Low		Yes		Low		Yes		No		Low		No
102	Brink 2016	Indicators for Assessing Habitat Values and Pressures for Protected Areas-An Integrated Habitat and Land Cover Change Approach for the Udzungwa Mountains National Park in Tanzania	Katherine Pulido Chadid	Medium		Seemingly yes		Seemingly no		Seemingly yes		Medium		Seemingly no		Low		Yes		Low		Seemingly yes		Medium		Yes		No		Low		Seemingly no
102	Brink 2016	Indicators for Assessing Habitat Values and Pressures for Protected Areas-An Integrated Habitat and Land Cover Change Approach for the Udzungwa Mountains National Park in Tanzania	Consensus	Medium		Seemingly yes		Seemingly no		Seemingly yes		Medium		Seemingly no		Low		Yes		Low		Seemingly yes		Medium		Yes		No		Low		Seemingly no
98	Schmitz 2023	Assessing the role of protected areas in the land-use change dynamics of a biodiversity hotspot	Katherine Pulido Chadid	Low		Seemingly yes		Seemingly no		NA		Medium		Seemingly yes		Low		Yes		Low		Yes		Low		Yes		No		Low		No
98	Schmitz 2023	Assessing the role of protected areas in the land-use change dynamics of a biodiversity hotspot	Consensus	Low		Seemingly yes		Seemingly no		NA		Medium		Seemingly yes		Low		Yes		Low		Yes		Low		Yes		No		Low		No
96	Lawrence 2021	Landscape fragmentation of the Natura 2000 network and its surrounding areas	Katherine Pulido Chadid	Low		Yes		Seemingly no		NA		Medium		Seemingly no		Low		Yes		Low		Yes		Low		Yes		Seemingly no		Low		No
96	Lawrence 2021	Landscape fragmentation of the Natura 2000 network and its surrounding areas	Consensus	Low		Yes		Seemingly no		NA		Medium		Seemingly no		Low		Yes		Low		Yes		Low		Yes		Seemingly no		Low		No
94	Mancini 2005	Biological quality of running waters in protected areas: the influence of size and land use	Katherine Pulido Chadid	Low		Seemingly yes		Seemingly yes		Seemingly no		Low		Seemingly yes		Low		Yes		Low		Yes		Low		Yes		Seemingly no		Low		No
94	Mancini 2005	Biological quality of running waters in protected areas: the influence of size and land use	Consensus	Low		Seemingly yes		Seemingly yes		Seemingly no		Low		Seemingly yes		Low		Yes		Low		Yes		Low		Yes		Seemingly no		Low		No
92	Kindermann 2023	Combining historical aerial photography with machine learning to map landscape change impacts on dry grasslands in the Central Alps	Katherine Pulido Chadid	Low		Seemingly yes		Seemingly yes		NA		Medium		No		Low		Yes		Low		Yes		Medium		No		Seemingly yes		Low		No
92	Kindermann 2023	Combining historical aerial photography with machine learning to map landscape change impacts on dry grasslands in the Central Alps	Consensus	Low		Seemingly yes		Seemingly yes		NA		Medium		No		Low		Yes		Low		Yes		Medium		No		Seemingly yes		Low		No
89	Medeiros 2023	Effectiveness of Federal Protected Areas in the Preservation of Mangrove Forests on the Coast of the State of Paraiba, Brazil	Katherine Pulido Chadid	Medium		Yes		Seemingly no		Seemingly no		Low		Seemingly yes		Low		Yes		Low		Yes		Low		Yes		No		Low		No
89	Medeiros 2023	Effectiveness of Federal Protected Areas in the Preservation of Mangrove Forests on the Coast of the State of Paraiba, Brazil	Consensus	Medium		Yes		Seemingly no		Seemingly no		Low		Seemingly yes		Low		Yes		Low		Yes		Low		Yes		No		Low		No
86	Li 2022	Effectiveness of the Qilian Mountain Nature Reserve of China in Reducing Human Impacts	Katherine Pulido Chadid	Medium		Seemingly yes		Seemingly no		NA		Medium		Seemingly yes		Low		Yes		Low		Yes		Low		No		No		Low		No
86	Li 2022	Effectiveness of the Qilian Mountain Nature Reserve of China in Reducing Human Impacts	Consensus	Medium		Seemingly yes		Seemingly no		NA		Medium		Seemingly yes		Low		Yes		Low		Yes		Low		No		No		Low		No
83	Adeney 2009	Reserves protect against deforestation fires in the Amazon	Katherine Pulido Chadid	Medium	We recognize that there will be confounding factors: (a) Given that severe droughts remove moisture limitations and thus promote the spread of fires, do different kinds of reserves offer varying levels of protection in El Nino Southern Oscillation (ENSO) years?	Yes	Droughts	Seemingly yes		NA		Medium		No		Low		Yes		Low		Yes		Low		Yes		No		Low		No
83	Adeney 2009	Reserves protect against deforestation fires in the Amazon	Consensus	Medium		Yes		Seemingly yes		NA		Low		NA		Low		Yes		Low		Yes		Low		Yes		No		Low		No
82	Giliba 2022	Multiple anthropogenic pressures challenge the effectiveness of protected areas in western Tanzania	Katherine Pulido Chadid	Low		Seemingly yes		Yes		NA		Medium		Seemingly no		Low		Yes		Low		Yes		Low		Yes		No		Low		No
82	Giliba 2022	Multiple anthropogenic pressures challenge the effectiveness of protected areas in western Tanzania	Consensus	Low		Seemingly yes		Yes		NA		Medium		Seemingly no		Low		Yes		Low		Yes		Low		Yes		No		Low		No
81	Eklund 2022	Elevated fires during COVID-19 lockdown and the vulnerability of protected areas	Katherine Pulido Chadid	Low		Seemingly yes		Seemingly yes		Seemingly yes		Low		Seemingly yes		Low		Yes		Low		Yes		Low		Yes		No		Low		No
81	Eklund 2022	Elevated fires during COVID-19 lockdown and the vulnerability of protected areas	Consensus	Low		Seemingly yes		Seemingly yes		Seemingly yes		Low		Seemingly yes		Low		Yes		Low		Yes		Low		Yes		No		Low		No
80	Karimi 2020	Assessing national human footprint and implications for biodiversity conservation in Iran	Consensus	Low		Seemingly yes		NA		No		Medium		Seemingly no		Low		Yes		Low		Yes		Low		Yes		No		Low		Seemingly no
68	Geldmann 2019	A global-level assessment of the effectiveness of protected areas at resisting anthropogenic pressures	Katherine Pulido Chadid	Low		Seemingly yes		Yes		NA		Low		Yes		Low		Yes		Low		Yes		Low		Yes		No		Low		No
68	Geldmann 2019	A global-level assessment of the effectiveness of protected areas at resisting anthropogenic pressures	Consensus	Low		Seemingly yes		Yes		NA		Low		Yes		Low		Yes		Low		Yes		Low		Yes		No		Low		No
66	Koju 2021	COVID-19 lockdown frees wildlife to roam but increases poaching threats in Nepal	Katherine Pulido Chadid	Low		Seemingly no		Seemingly yes		Seemingly no		Low		Yes		Low		Yes		Low		Yes		Low		Yes		No		Low		Seemingly no
66	Koju 2021	COVID-19 lockdown frees wildlife to roam but increases poaching threats in Nepal	Consensus	Low		Seemingly no		Seemingly yes		Seemingly no		Low		Yes		Low		Yes		Low		Yes		Low		Yes		No		Low		Seemingly no
61	Jacob 2017	Land cover dynamics in the Simien Mountains (Ethiopia), half a century after establishment of the National Park	Katherine Pulido Chadid	Low		Seemingly yes		Seemingly yes		NA		Medium		Seemingly no		Low		Yes		Low		Yes		Low		Yes		No		Low		No
61	Jacob 2017	Land cover dynamics in the Simien Mountains (Ethiopia), half a century after establishment of the National Park	Consensus	Low		Seemingly yes		Seemingly yes		NA		Medium		Seemingly no		Low		Yes		Low		Yes		Low		Yes		No		Low		No
58	Songer 2009	Spatial and temporal deforestation dynamics in protected and unprotected dry forests: a case study from Myanmar (Burma)	Katherine Pulido Chadid	Medium		Seemingly yes		Seemingly yes		NA		Medium		Seemingly no		Low		Yes		Low		Yes		Low		Yes		No		Low		No
58	Songer 2009	Spatial and temporal deforestation dynamics in protected and unprotected dry forests: a case study from Myanmar (Burma)	Consensus	Medium		Seemingly yes		Seemingly yes		NA		Medium		Seemingly no		Low		Yes		Low		Yes		Low		Yes		No		Low		No
55	Zeng 2023	Monitoring the light pollution changes of China's mangrove forests from 1992-2020 using nighttime light data	Katherine Pulido Chadid	Medium		Yes		No		NA		Medium		No		Low		Yes		Low		Yes		Low		Yes		No		Low		No
55	Zeng 2023	Monitoring the light pollution changes of China's mangrove forests from 1992-2020 using nighttime light data	Consensus	Medium		Yes		No		NA		Medium		No		Low		Yes		Low		Yes		Low		Yes		No		Low		No
45	Pfeifer 2012	Protected areas: mixed success in conserving East Africa's evergreen forests	Katherine Pulido Chadid	Medium		Seemingly yes		Yes		NA		Medium		Seemingly yes		Low		Yes		Low		Yes		Low		Yes		No		Low		No
45	Pfeifer 2012	Protected areas: mixed success in conserving East Africa's evergreen forests	Consensus	Medium		Seemingly yes		Yes		NA		Medium		Seemingly yes		Low		Yes		Low		Yes		Low		Yes		No		Low		No
42	Nagendra 2004	Monitoring parks through remote sensing: studies in Nepal and Honduras	Katherine Pulido Chadid	Low		Yes		Yes		NA		Medium		Seemingly yes		Low		Yes		Low		Yes		Low		Yes		No		Low		No
42	Nagendra 2004	Monitoring parks through remote sensing: studies in Nepal and Honduras	Consensus	Low		Yes		Yes		NA		Medium		Seemingly yes		Low		Yes		Low		Yes		Low		Yes		No		Low		No
40	Gnansounou 2022	The co-management approach has positive impacts on mangrove conservation: evidence from the mono transboundary biosphere reserve (Togo-Benin), West Africa	Katherine Pulido Chadid	Medium		Yes	PeopleÂ´s perception on threat reduction	No		Seemingly no		Low		Seemingly no		Low		Seemingly yes		Low		Yes		Low		Yes		No		Low		Seemingly no
40	Gnansounou 2022	The co-management approach has positive impacts on mangrove conservation: evidence from the mono transboundary biosphere reserve (Togo-Benin), West Africa	Consensus	Medium		Yes		No		Seemingly no		Low		Seemingly no		Low		Seemingly yes		Low		Yes		Low		Yes		No		Low		Seemingly no
34	Kong 2022	Dynamic threats of nighttime light-represented human activities to giant pandas and their habitat	Katherine Pulido Chadid	Medium		Seemingly yes		Seemingly no		No		Low		Seemingly no		Low		Yes		Low		Yes		Medium		Seemingly yes		Seemingly yes		Low		No
34	Kong 2022	Dynamic threats of nighttime light-represented human activities to giant pandas and their habitat	Consensus	Medium		Seemingly yes		Seemingly no		No		Low		Seemingly no		Low		Yes		Low		Yes		Medium		Seemingly yes		Seemingly yes		Low		No
33	All 2017	Fire Response to Local Climate Variability: Huascaran National Park, Peru	Katherine Pulido Chadid	Medium		Seemingly yes		Seemingly yes		NA		Medium		Seemingly no		Low		Yes		Low		Yes		Low		Yes		No		Low		No
33	All 2017	Fire Response to Local Climate Variability: Huascaran National Park, Peru	Consensus	Medium		Seemingly yes		Seemingly yes		NA		Medium		Seemingly no		Low		Yes		Low		Yes		Low		Yes		No		Low		No
30	Shen 2021	Protected areas have remarkable spillover effects on forest conservation on the Qinghaiâ€Tibet Plateau	Katherine Pulido Chadid	Low		Yes		Yes		NA		Low		Yes		Low		Yes		Low		Yes		Low		Yes		No		Low		No
30	Shen 2021	Protected areas have remarkable spillover effects on forest conservation on the Qinghaiâ€Tibet Plateau	Consensus	Low		Yes		Yes		NA		Low		Yes		Low		Yes		Low		Yes		Low		Yes		No		Low		No
29	Joppa 2011	Global protected area impacts	Katherine Pulido Chadid	Low		Yes		Yes		NA		Low		Yes		Low		Yes		Low		Yes		Low		Yes		No		Low		No
29	Joppa 2011	Global protected area impacts	Consensus	Low		Yes		Yes		NA		Low		Yes		Low		Yes		Low		Yes		Low		Yes		No		Low		No
26	Szilassi 2021	Natura 2000 Areas, Road, Railway, Water, and Ecological Networks May Provide Pathways for Biological Invasion: A Country Scale Analysis	Katherine Pulido Chadid	Medium		Yes		Seemingly no		No		Medium		Seemingly no		Low		Yes		Low		Yes		Low		Yes		No		Low		No
26	Szilassi 2021	Natura 2000 Areas, Road, Railway, Water, and Ecological Networks May Provide Pathways for Biological Invasion: A Country Scale Analysis	Consensus	Medium		Yes		Seemingly no		No		Medium		Seemingly no		Low		Yes		Low		Yes		Low		Yes		No		Low		No
23	Dwiyahreni 2021	Changes in the human footprint in and around Indonesia's terrestrial national parks between 2012 and 2017	Katherine Pulido Chadid	Low		Seemingly no		Seemingly yes		NA		Low		Yes		Low		Yes		Low		Yes		Low		Yes		No		Low		No
23	Dwiyahreni 2021	Changes in the human footprint in and around Indonesia's terrestrial national parks between 2012 and 2017	Consensus	Low		Seemingly no		Seemingly yes		NA		Low		Yes		Low		Yes		Low		Yes		Low		Yes		No		Low		No
18	Kleemann 2022	Deforestation in Continental Ecuador with a Focus on Protected Areas	Katherine Pulido Chadid	Low		Seemingly yes		Yes		No		Low		Seemingly no		Low		Yes		Low		Yes		Low		Yes		No		Low		No
18	Kleemann 2022	Deforestation in Continental Ecuador with a Focus on Protected Areas	Consensus	Low		Seemingly yes		Yes		No		Low		Seemingly no		Low		Yes		Low		Yes		Low		Yes		No		Low		No
16	Wang 2023	Rapid and large changes in coastal wetland structure in China's four major river deltas	Katherine Pulido Chadid	Low		Seemingly yes		Yes		NA		NA		NA		Low		Yes		Low		Yes		Low		Yes		No		Low		No
16	Wang 2023	Rapid and large changes in coastal wetland structure in China's four major river deltas	Consensus	Low		Seemingly yes		Yes		NA		NA		NA		Low		Yes		Low		Yes		Low		Yes		No		Low		No
15	Carranza 2014	Protected Area Effectiveness in Reducing Conversion in a Rapidly Vanishing Ecosystem: The Brazilian Cerrado	Katherine Pulido Chadid	Low		Seemingly yes		Seemingly yes		NA		Low		Yes		Low		Yes		Low		Yes		Low		Yes		No		Low		No
15	Carranza 2014	Protected Area Effectiveness in Reducing Conversion in a Rapidly Vanishing Ecosystem: The Brazilian Cerrado	Consensus	Low		Seemingly yes		Seemingly yes		NA		Low		Yes		Low		Yes		Low		Yes		Low		Yes		No		Low		No
12	Gracia 2011	Land-cover changes in and around a National Park in a mountain landscape in the Pyrenees	Katherine Pulido Chadid	Medium		Seemingly yes		Seemingly no		NA		Medium		Seemingly no		Low		Yes		Low		Yes		Low		Yes		No		Low		No
12	Gracia 2011	Land-cover changes in and around a National Park in a mountain landscape in the Pyrenees	Consensus	Medium		Seemingly yes		Seemingly no		NA		Medium		Seemingly no		Low		Yes		Low		Yes		Low		Yes		No		Low		No
10	Bleher 2006	Assessment of threat status and management effectiveness in Kakamega forest, Kenya	Katherine Pulido Chadid	Medium		Yes		Seemingly no		No		Low		Yes	Additional 10 new sites where chosen where Mutangah (1996) had not carried out any surveys in the past	Low		Yes		Low		Yes		Low		Yes		Seemingly no		Medium		Seemingly no
10	Bleher 2006	Assessment of threat status and management effectiveness in Kakamega forest, Kenya	Consensus	Medium		Yes		Seemingly no		No		Low		Yes		Low		Yes		Low		Yes		Low		Yes		Seemingly no		Medium		Seemingly no
9	Anderson 2020	The role of protected areas in mitigating human impact in the world's last wilderness areas	Katherine Pulido Chadid	Low	In addition to controlling for differences in elevation and slope, we controlled for the different coun_x0002_tries in which the points were found. This was necessary because areas in different countries are not directly com_x0002_parable due to dissimilarities in socioeconomic factors as well as environmental governance	Seemingly yes		Yes		NA		Low		Yes		Low		Yes		Low		Yes		Low		Yes		No		Low		No
9	Anderson 2020	The role of protected areas in mitigating human impact in the world's last wilderness areas	Consensus	Low		Seemingly yes		Yes		NA		Low		Yes		Low		Yes		Low		Yes		Low		Yes		No		Low		No
8	Hill 2021	Global protected-area coverage and human pressure on tidal flats	Consensus	Medium		Seemingly yes		Seemingly yes		NA		Medium		Seemingly no		Low		Yes		Low		Yes		Low		Yes		No		Low		No
6	Verma 2020	Severe human pressures in the Sundaland biodiversity hotspot	Katherine Pulido Chadid	Medium		Seemingly yes		Seemingly no		No		Medium		Seemingly no		Low		Yes		Low		Yes		Low		Yes		No		Low		No
6	Verma 2020	Severe human pressures in the Sundaland biodiversity hotspot	Consensus	Medium		Seemingly yes		Seemingly no		No		Medium		Seemingly no		Low		Yes		Low		Yes		Low		Yes		No		Low		No
5	Gimmi 2013	Assessing naturalness in northern great lakes forests based on historical land-cover and vegetation changes	Katherine Pulido Chadid	Medium		Seemingly yes		Seemingly no		NA		Low		Seemingly yes		Low		Yes		Low		Yes		Low		Yes		No		Low		No
5	Gimmi 2013	Assessing naturalness in northern great lakes forests based on historical land-cover and vegetation changes	Consensus	Medium		Seemingly yes		Seemingly no		NA		Low		Seemingly yes		Low		Yes		Low		Yes		Low		Yes		No		Low		No
4	Bhadouria 2012	Monitoring of organochlorine pesticides in and around Keoladeo National Park, Bharatpur, Rajasthan, India	Katherine Pulido Chadid	Medium		Seemingly yes		Seemingly no	Samples were collected from different blocks of the park, which likely accounts for variations in factors like proximity to agricultural areas and human settlements.	No		NA		NA		NA		NA		Low		Yes		Low		Yes		No		Low		No
4	Bhadouria 2012	Monitoring of organochlorine pesticides in and around Keoladeo National Park, Bharatpur, Rajasthan, India	Consensus	Medium		Seemingly yes		Seemingly no		No		NA		NA		NA		NA		Low		Yes		Low		Yes		No		Low		No
