# Supplementary material for: A systematic review of the effectiveness of protected areas at reducing threats to biodiversity
Source: Research Square preprint supplement (doi:10.21203/rs.3.rs-7046705/v1), 2025-07-11
Supplement: Supplementary file 3 [file f7f34e86b987e50004f9d6c1.docx]

Additional file 3 – Data coding and extraction strategy

This document reports the decisions made in regard to data coding and extraction of data from the studies

# Study characteristics

Table S1. Scale of the conducted studies

| Type | Description |
| --- | --- |
| Global | Global or analysis involving several countries in multiple continents |
| Continental | Analysis involving all or several countries in a continent |
| Regional | Region within a country |
| National | Country level analysis |
| Local | Analysis conducted at the PA level |

Table S2. Study design types and definitions

This table summarizes common study designs found in the literature (e.g., BACI, BA, CI), with explanations of each framework.

|  | Description | Study timeframe | Supporting questions |
| --- | --- | --- | --- |
| BACI | Studies that involve:  1) A Before-After time comparison of an implemented intervention (e.g., management strategy implementation, change in management authority, or PA declaration); and  2) A Control-Impact spatial comparison between PA(s) and surrounding areas or comparator sites. | Record BA years.   1. Before:   Start of intervention, Start of monitoring, End of monitoring.   1. After:   Start, End.  3. Total study duration | - Was a management comparison involved? If yes, which one?  - Was a comparison inside vs. outside the PA conducted?  - Were counterfactuals used? If yes, which type (e.g., matching, similar area, other)? |
| BA | Studies using a time-based comparison before and after an implemented intervention. | Record BA years.   1. Before:   Start of intervention, Start of monitoring, End of monitoring.  2. Total study duration |
| CI | Studies using a spatial comparison between PA(s) and surrounding areas or comparator sites without specific mention of matching approaches. May also involve a temporal comparison after the intervention (no "before" period). | Record CI timeframe:  1. Start, End.  2. Total study duration |
| CI (Matching) | Studies using a spatial comparison between PA(s) and surrounding areas or control sites, explicitly using matching methods. May also include a temporal comparison after the intervention (no "before" period). | Record CI timeframe:  1. Start, End.  2. Total study duration |

Table S3. Types of comparators

A comparator refers to any unit—such as an area, time period, or management intervention—used as a benchmark to evaluate the effectiveness of a PA. Comparators can include areas outside the PA, buffer zones surrounding the PA, PAs with varying levels of protection, or comparisons before and after an intervention. These comparators may be descriptive or loosely matched without strict equivalency, or they may involve the use of control with counterfactuals, which aim to represent what would have happened in the absence of the intervention.

| Comparator type | Description |
| --- | --- |
| Inside - Outside | Compares areas inside and outside the PA. |
| PA - PA buffer | Compares the interior of the PA with its surrounding buffer zone. |
| PA - PA categories | Compares outcomes between PAs with different levels of enforcement or protection categories. |
| PA - Gradient | Compares threat levels within PAs under different gradients of pressure, management strictness, or locations within the PA facing conditions influencing the outcomes. |
| PA - Management intervention | Compares threat levels inside PA(s) to measure the effectiveness of a management intervention |
| PA - Other land use types | Compares threat llevels of PA(s) with other land use types in the surrouding landscape (eg. Indigenous lands, ) |

# Data collection and measurements

Table S4. Threat assessment methods

| Threat assessment method | Includes | Additional supporting data |
| --- | --- | --- |
| Remote sensing | Satellite imagery analysis (e.g., land use/land cover change, aerial photographs). | Threat indicator: Metric used to represent the threat.  Unit of measurement: Units in which outcomes were quantified.  **Method of analysis:** Techniques or statistical methods used to analyze the collected data. |
| RS - Threat indices | Human footprint, human pressure, or other remote sensing-based composite indices. |
| Field sampling/Interviews | Field observations, ecological sampling, structured interviews, or questionnaires. |
| Others | Secondary data sources, historical data, comparisons with past studies, species occurrence records. |

Table S5. Data extraction regarding protected areas

| Study population - Protected areas | Description |
| --- | --- |
| Protected areas involved | Indicates the type of PA representation in the study: single PA, multiple PAs of the same type, or multiple PAs of mixed types. |
| Number of PAs analysed | Total number of protected areas included in the study. |
| PA name, type, reported management strategies, community involvement, declaration year, designated buffer zone, size of analyzed buffer | If available, includes the PA name, type, reported management strategies, community involvement, year of declaration, designated buffer zone, and size of the buffer analyzed. |

# Study outcomes

Table S6. Terms and definitions of extracted data

| Term | Definition |
| --- | --- |
| Publications | Grey literature or peer reviewed articles |
| Articles | Peer-reviewed literature. |
| Studies | A single article may include multiple studies, often based on different types of interventions (e.g., comparisons across different PA strictness levels, management interventions). |
| Cases | Some studies reported findings on more than one threat. Each threat was extracted and treated as an independent case. |

Table S5. Core questions addressed

| Question | Option | Description |
| --- | --- | --- |
| A. Have threats changed within PA over time?  B. Have threats changed outside PA? | Increased | Threats increased by more than 10% compared to the baseline or control. |
| Slightly increased | Threats increased by 5–10%. |
| Neutral | No significant change; effect size between 0–4%, or p-values are non-significant. |
| Slightly decreased | Threats decreased by 5–10%. |
| Decreased | Threats decreased by more than 10% compared to the comparator. |
| NA | No comparison was reported. |
| C. PA more effective than outside/control? | Yes | Threat levels inside PAs were lower than in comparator/control areas. |
| Slightly yes | Threats inside PAs were reduced by 5–10% compared to control. |
| Neutral | No significant difference (0–4%) or non-significant p-values. |
| Slightly no | Threats inside PAs were 5–10% higher than in control. |
| No | Threats inside PAs were higher than in comparator/control areas. |
| NA | No comparison was reported. |

Table S6. Data coding of reasons leading to observed threat outcomes

| Effectiveness dimension | Factor | Effect |
| --- | --- | --- |
| Location and baseline considerations | High threat area | PAs surrounded by areas under high human pressure or located on land with high economic interest, either as baseline or during the study period. |
| Low threat area | PAs located in areas with low economic interest and limited development pressures. |
| Permeable boundaries | External effects (e.g., chemical pollution, light pollution) reaching PAs due to lack of physical barriers. |
| High accessibilty | Easy access to PAs (e.g., near roads or non-remote areas). |
| Population density | PAs surrounded by land with high human population density. |
| Design | Fragmentation | Areas reporting high habitat or PA fragmentation |
| PA size (large and small) | Reported effect depending on the PA size |
| PA age | Some studies reported older PAs as less effective than more recently designated ones. |
| Management | Funding and resources (sufficient/insufficient) | Presence, absence, or quality of financial and logistical support linked to observed outcomes. |
| Management interventions or strategies | Existence or absence of management plans, actions, or strategies directly influences PA outcomes. |
| Level of enforcement | Enforcement level (e.g., IUCN category, or declaration type level (national vs. local) noted as determinants. |
| National development index | Higher or lower national development status may influence policy, investment, and enforcement. |
| Governance structure | Type and quality of institutional or governmental involvement, including community participation. |
| Indigenous communities | Effects of Indigenous land rights or community presence in or around PAs on conservation outcomes. |
| Social conflicts | Presence of violence, protests, or socioeconomic instability negatively affecting PA governance or performance. |
